# Supplementary material for: Comparative Metaproteomics and Diversity Analysis of Human Intestinal Microbiota Testifies for Its Temporal Stability and Expression of Core Functions
Source: PLOS journal article supplement (doi:10.1371/journal.pone.0029913), 2012-01-18

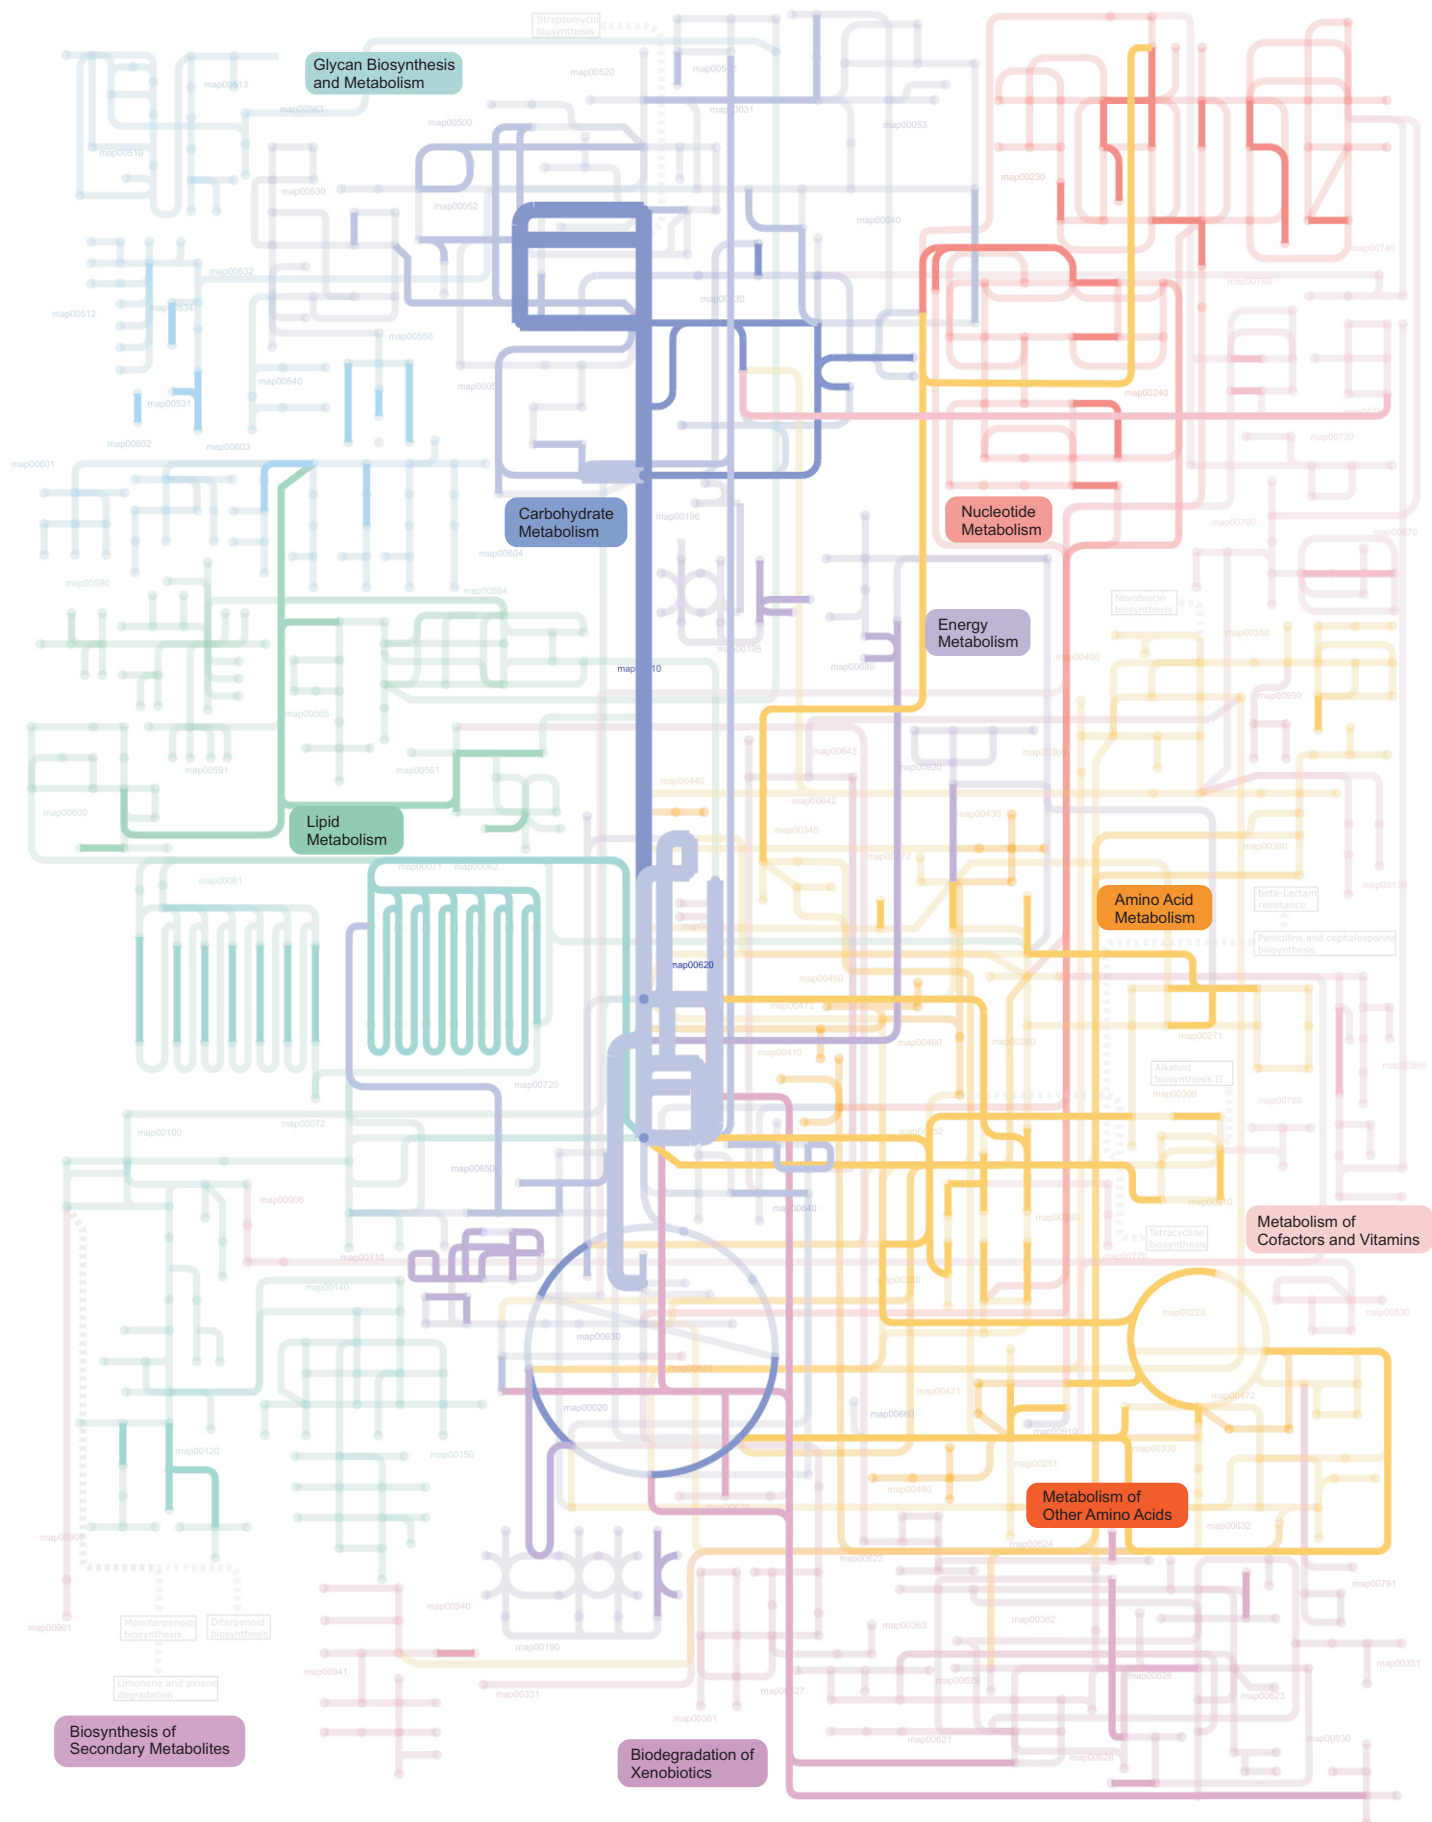

Supplement: S3 (10.1371/journal.pone.0029913.s003) [file journal.pone.0029913.s003]
