# Supplementary material for: Comparative Metaproteomics and Diversity Analysis of Human Intestinal Microbiota Testifies for Its Temporal Stability and Expression of Core Functions
Source: PLoS One. 2012 Jan 18;7(1):e29913. doi: 10.1371/journal.pone.0029913 (PMC3261163; doi:10.1371/journal.pone.0029913)
Supplement: Table S2 — List of sequences with annotation “pili” and “surface-layer protein.” (XLSX) [file pone.0029913.s007.xlsx]

## Sheet: pilus-like proteins
protseq	MASTER ID(s)	co-MASTER ID(s)	subordinate ID(s)	ABC	A12	A1	A2	B12	B1	B2	C12	C1	C2	files & spectra	HML counts	Blast Hit
MNKVLKGLVAVAATAAMAVAGFAGASTAMAAENNYDITVPTTDTHTYSVYQVFTGDLSEGTLSNIKAGQNFNKNNTANKSAADAAAEIAQGTYADNTAKLAAITPYVDLAGTAYGEVSAKTALSAPAGYYLLKDKDAVTGNDAATLFIVQVNGPVTVNRKADKPTFEKKVKDVNDSTGDKTNWQDSADYDVNDEVPFQLTATLPTNEADFAAYKTYKLVFHDQQSAGLTFNKKSVVVKYGDKTLGAGSYTVTENPEDKDTFDITIADAKAVKDAEDNAITVAAGGKFTVEYTSTLNENAVIGSTGNPNEASLEFSNNPNVGGEGETGKTPTDKVIVFTYQLDINKTFNDGTPAENDLPKFKLYKFDSTTNDYTIDRGEVTITKTEGGKYTASFKRVDDG…	GL0062306_V1_sf5569_FWD_prot2811595 (Qin2010)	-	GL0019988_MH0041_sf2506_FWD_prot0950524 (Qin2010)	5 | 8	-	-	-	5 | 8	2 | 3	4 | 5	-	-	-	20090129_01233_dda (852, 1159); 20090129_01238_dda (875); 20090921_01918 (832, 993, 1773); 20090924_01938 (945, 1900)	H = 8, M = 0, L = 0	ref|ZP_06755534.1| putative surface protein Spb1 [Scardovia inopinate F0304] 273 6e-71
NNPNQEQGGTPDTGNTPWDNVIVFTYKVVVNKIDSSKKPLAGAAFELSKKVNDEYTRVALVNATQNTEGKYILSNETVTKFEWKGLDDGDYMLTEVITPAGYNTIAPIKFTVNADHTITWEGENRNTILTSLTGNAATGDITFTANDDKTELATNVVNNKGSELPSTGGMGTTIFYVVGSILVLGAAILLITKKRMSAR	GL0113878_MH0080_sf40737_FWD_prot1744546 (Qin2010)	-	-	1 | 4	-	-	-	1 | 4	1 | 2	1 | 2	-	-	-	20090129_01233_dda (411); 20090129_01238_dda (416); 20090921_01918 (316); 20090924_01938 (298)	H = 4, M = 0, L = 0	dbj|BAG74780.1| putative pilus subunit protein [Streptococcus suis] 159 2e-37
MKMKKFAALAAATVMSVSAIAATSAFGVFATTDAGVNNIVIKDSDTNRVYKAYQIFDQASATNTIKWGKGINGDALLTSLKTSGLSTYMSQFDSAENAVDVAKIISDADHWTKEDTAKFAKAASACIIDSKSVTAHEANGEYTINVPNAGYYLVVDATENNGVDKANSALILNVSGTTDVTPKRTKPTLTKQIKHNESDTWGDVGDNAIGDDVEFKITTTIPSDVSAYDKYTYTVRDQLSEGFTFNDNLTYKYYDADGQEITSVTVGPNKTVGDDSSTTDYKESFYVTFDIKELVKNYPTVAKIETYYSAKLNEKAKVAVTAPDSVNNNPNTAYLTYSNNPQDTTGKEKGETPKVTVYDWTFSLVGNKVDEKGEPLAGAKFQLQDKNGAVLKLVDISDG…	GL0086042_MH0058_sf14368_FWD_prot1257734 (Qin2010)	GL0027480_MH0014_sf10801_FWD_prot0424593 (Qin2010), GL0171648_MH0011_sf4185_FWD_prot0220502 (Qin2010)	-	1 | 2	-	-	-	-	-	-	1 | 2	1 | 2	-	20090921_01919 (321); 20090924_01939 (286)	H = 2, M = 0, L = 0	ref|YP_003430984.1| peptidoglycan linked protein-fimbrial struct... 180 5e-43		dbj|BAG74780.1| putative pilus subunit protein [Streptococcus suis] 139 8e-31
MKTIKRSIALVLAMILTLAMSVTVFAAPNADQNTFSLTLNKAVKGHTYEAYQILSGDLSADKATLSNIKWGEGITEAGQTALGGDAASYAEKLGGFGNNSSELKEQAQIIGANLASASGSVTVTDPDAKNVISNLKPGYYLIKDQDNSLQGQESYTEFILHITDDVVANVKADVPSVEKKVKDTNDTTGVTTDWQDSADYDIGDDVPFQLTATLANNIESYKAYSLEFDDTLSKGLDYNNDAVIKLGEKDVTDYFTPSYDATAKTLTFTCDNILAFGAKNSDQIVVEYTAKLNENAVIGAAGNPNKVSLKFSNNPNNGGEGDRGTTPEDKVIVFTYKLTVNKVDKDNKPLTGAEFSLFKKVKVDGQEELKLVEVKKILSTNTEGTVFGFTGLDDGTYVL…	238924226_0147_Erect_FWD_prot (GutBugs2010)	GL0020467_O2_sf44869_FWD_prot1995262 (Qin2010), 162869900_In-A_BABB01000107_FWD_prot9 (Kurokawa2007)	163309369_In-D_BABD01001323_FWD_prot2 (Kurokawa2007), 163632849_In-R_BABG01003418_FWD_prot2 (Kurokawa2007)	5 | 13	-	-	-	1 | 2	-	1 | 2	5 | 11	4 | 6	3 | 5	20090921_01918 (622); 20090921_01919 (585, 616, 1197, 1280); 20090921_01920 (537, 560, 1313); 20090924_01938 (580); 20090924_01939 (557, 1118); 20090924_01940 (481, 506)	H = 13, M = 0, L = 0	dbj|BAG74780.1| putative pilus subunit protein [Streptococcus suis] 375 7e-102
EGDVTITIGSETTPASVGDVYAGYRLFDETEATVGEKTNVAYQKRTNWNHYDKVAEAIKDVDSSATLTADSKVDDFVAAIGKFDSTKTKRFAENLYKSLKEDGVAADANSAAVAAGAFSTTLSGPQGYYLIVQTTAANDAGKTMSAVIVNTAGQAGVTVSPKKDTVTVSKKVQENMDGVNNPASEDNWGTAADYNIGDYVKFQLTGSLPTDYADYTSYEYTFHDTADQGLTFVNDTTHPVKVYAVNDNNKVELKQDTLTGYQVLTSDINGETFNVKFADLKKAQAEKTGDTVNITSSTQIVVEYYAQLNENAVLGSNGNQNKVYLQFSNNKYGEGTGKTEEHKVTVFTFKLEVTKYGKTDSDKEALNGAGFTLYKATKVNPADSDYAKVGDEVQHTNGN…	GL0085421_MH0069_sf11607_FWD_prot1492368 (Qin2010)	-	GL0319622_MH0012_sf47975_FWD_prot0322423 (Qin2010)	5 | 12	-	-	-	-	-	-	5 | 12	5 | 10	2 | 2	20090921_01919 (595, 618, 724, 959, 1472); 20090921_01920 (881); 20090924_01939 (544, 563, 668, 892, 1376); 20090924_01940 (1243)	H = 12, M = 0, L = 0	dbj|BAG74780.1| putative pilus subunit protein [Streptococcus suis] 226 9e-57
SLTLNKAVKGHTYEAYQILSGDLSADKATLSNIKWGEGIKAEGQTALGGDAAGYAKKLADMGNNSKELKEQAQIIGANLASASGSVTVTDPDAKSVISNLKPGYYLIKDKDDSLQGQESYTEFILHVTDDVDANVKADVPSVEKKVKDTNDTTGETTGWQDSADYDIGDDVPFQLTATLANNIESYKTYSLKFNDTLSKGLDYNNDAVIKLGDKDVTSYFTPSYDATAKTLTFTCDNILAFGATNSDKIVVEYTAKLNENAVIGAAGNPNTVYLDFSNNPNNGGEGDRGKTPEDKVIVFTYKLTVNKVDKENKPLTGAEFSLFKKVNGKDELVEVKKILSTNAEGTVFGFTGLDDGTYVLRETKTPDGYNSIEDQTFTISAKHDESSDDPKLTALTGDV…	GL0095928_MH0086_sf57859_FWD_prot1904464 (Qin2010)	-	GL0084418_MH0065_sf105517_FWD_prot1428981 (Qin2010)	4 | 11	-	-	-	2 | 3	1 | 1	1 | 2	4 | 8	3 | 5	2 | 3	20090129_01233_dda (497); 20090921_01918 (622); 20090921_01919 (385, 585, 828); 20090921_01920 (537, 1313); 20090924_01938 (580); 20090924_01939 (348, 767); 20090924_01940 (481)	H = 11, M = 0, L = 0	dbj|BAG74780.1| putative pilus subunit protein [Streptococcus suis] 359 4e-97
MNKVLKGLVAVAATAAMAVAGFAGASTAMAAENNYDITVPTTDTHTYSVYQVFTGDLSEGTLSNIKAGQNFNKNNTANKSAADAAAEIAQGTYADNTAKLAAITPYVDLAGTAYGEVSAKTALSAPAGYYLLKDKDAVTGNDAATLFIVQVNGPVTVNRKADKPTFEKKVKDVNDSTGDKTNWQDSADYDVNDEVPFQLTATLPTNEADFAAYKTYKLVFHDQQSAGLTFNKKSVVVKYGDKTLGAGSYTVTENPEDKDTFDITIADAKAVKDAEDNAITVAAGGKFTVEYTSTLNENAVIGSTGNPNEASLEFSNNPNVGGEGETGKTPTDKVIVFTYQLDINKTFNDGTPAENDLPKFKLYKFDSTTNDYTIDRGEVTITKTEGGKYTASFKRVDDG…	GL0062306_V1_sf5569_FWD_prot2811595 (Qin2010)	-	GL0019988_MH0041_sf2506_FWD_prot0950524 (Qin2010)	5 | 8	-	-	-	5 | 8	2 | 3	4 | 5	-	-	-	20090129_01233_dda (852, 1159); 20090129_01238_dda (875); 20090921_01918 (832, 993, 1773); 20090924_01938 (945, 1900)	H = 8, M = 0, L = 0	dbj|BAG74780.1| putative pilus subunit protein [Streptococcus suis] 268 1e-69

## Sheet: Surface-layer like proteins
protseq	MASTER ID(s)	co-MASTER ID(s)	subordinate ID(s)	ABC	A12	A1	A2	B12	B1	B2	C12	C1	C2	files & spectra	HML counts	BLAST Hit
GVFKGYEDGSFKPEGNITRAEVATIIYRIYTADVAKNDKSGLYATYNKFSDMAGAGWAQGYIGYCANASLVKGYPDGTFKPSGKVTGYEVLAMILRAVGYDKNNEFSGADWALHVAQTAQQLGVLDNVAKTTDLNAPASRELVAELLFQGIQKAQVTYTPAFGYVTDKVISTKTNSLGEKNFKLASAVAADKWGRPATKWTYTTGDKATTFVEKPDLTYTKAVAECDVAHDLDLSADTAYALIVNGQTASTKYTVNLTDTKTKMGAQGRLFEVYKDAKTIVMIDTFLAKVTYVADITYDAQGHVKTPATITLEVYDAKNASTPLTLKDYDDNYGYAKDEYVLVNAYTDKATNSATVSGKVLNTADQYAEIVSKATSVDGAQSVIYWNAQQHNVEGTVYD…	GL0081734_V1_sf29962_FWD_prot2514174 (Qin2010)	GL0091883_MH0025_sf14319_FWD_prot0641440 (Qin2010), GL0057015_V1_sf1443_FWD_prot2429327 (Qin2010), GL0049733_O2_sf40113_FWD_prot2133663 (Qin2010), GL0014029_V1_C4048270_FWD_prot2339064 (Qin2010)	GL0064488_V1_sf76522_FWD_prot2405992 (Qin2010), GL0046879_MH0017_sf42102_FWD_prot0506124 (Qin2010), GL0076433_MH0050_sf57075_FWD_prot1096617 (Qin2010), GL0077416_MH0055_sf8440_FWD_prot1199455 (Qin2010), GL0089028_V1_sf19302_FWD_prot2743078 (Qin2010), GL0011290_V1_sf14481_FWD_prot2740872 (Qin2010), GL0000961_O2_sf20401_FWD_prot2069114 (Qin2010), GL0056549_MH0073_sf34013_FWD_prot1592029 (Qin2010), …	2 | 5	2 | 5	2 | 5	-	-	-	-	-	-	-	20090129_01242_dda (1457, 1578); 20090129_01247_dda (1539, 1649, 1652)	H = 5, M = 0, L = 0	ref|ZP_07635711.1| S-layer domain-containing protein [Ruminococcaceae bacterium] 108 5e-21
MKKILAIAAAAALTAGVSAYAANPFSDVSTDDWAYQAVSDLSDQGVVEGYPDGTFKGERNMTRYELAQVIARLMAREDQLNAEQRATLDKLAGEYADELANLGVRVSNLEKKVGNISWSGDARMQYQHNLDGAKDHTDAWTGRLRINADAQVNDQVVVSGRFVSEMNFKDNKDANTIMDRIHARWTPNDAFYMDLGRQGVALDQTGVFWDEDGRFDGVVAGYDNGKFGAEFGYGRFQDAERSMDHYHWENSASIESWYGKLTGHFGESSAVSAFYLKNVQGLDGNSVDPDIKGAHVHAWGAGATIDLGDSGLNIDGDFIQTRGNRDLGHANLWTAGLNYGKVDLNKPGSFTLGVHYVRADAGAYLLGNSALDMTDQLEYGWDNGTGVKFWVAKAGVAVQ…	GL0004304_V1_sf17057_FWD_prot2816761 (Qin2010)	GL0121887_MH0003_sf11634_FWD_prot0030409 (Qin2010), 162759844_F2-X_BAAZ01005629_FWD_prot1 (Kurokawa2007), GL0000481_MH0020_sf18325_FWD_prot0551824 (Qin2010), GL0145651_MH0081_sf23848_FWD_prot1770269 (Qin2010), GL0109367_O2_sf22138_FWD_prot2213329 (Qin2010), GL0110905_MH0020_sf27214_FWD_prot0556248 (Qin2010), GL0082319_O2_sf2519_FWD_prot2136386 (Qin2010), GL0161687_V1_sf8368_FWD_prot2813006 (Qin20…	-	1 | 2	-	-	-	-	-	-	1 | 2	1 | 1	1 | 1	20090921_01920 (856); 20090924_01939 (865)	H = 2, M = 0, L = 0	ref|ZP_05734051.1| putative S-layer protein [Dialister invisus DSM 15470] 437 0.0
TTKDVEVKNYVLSTVAQNKLTELTATVTGNTKNLKASDFTVKSEATNVVYPVSKVTVDSKDASKVTLTLFSELKDAATYDVTLDGITKTFVASDGKVASIALDTATIPYATETEVKLVSKDANGVIVKELKYGEADNSYAFTIDTKGNGYTNGSKLYLNKVGDTAEATVEYKTGKYDQNGKPEGNIGPNKVTITAVDQSAVNNFAVKVVDSLNAKFDDAKDTNKVAANDTGKYACFMIKNADGKEIDATEYAKYTVESSDNTVLMLVNNTLTNKTVKLTPLKSGTAYILIKKDDKVVGSVAIEVGAERTVASLELDKYNVTLSNSIKDASGLTVADNKVVKTTLKDQYGDDISGDLVVECLSTDAKNIKSSDVTANAGSTYYRVSGKNVTFYSGVTKGN…	GL0053082_MH0045_sf92552_FWD_prot1024253 (Qin2010)	GL0034306_MH0046_sf11069_FWD_prot1030962 (Qin2010)	GL0006618_V1_sf7753_FWD_prot2657819 (Qin2010), GL0002524_O2_sf57241_FWD_prot2221162 (Qin2010), GL0007103_V1_sf91_FWD_prot2379896 (Qin2010), GL0127393_MH0033_sf79683_FWD_prot0814601 (Qin2010)	7 | 80	2 | 2	2 | 2	-	6 | 78	5 | 62	4 | 16	-	-	-	20090129_01233_dda (9, 37, 603, 635); 20090129_01234_dda (33, 57, 576, 586, 1270); 20090129_01235_dda (603, 611); 20090129_01236_dda (46, 536, 543, 1214); 20090129_01237_dda (39, 559, 569, 1269); 20090129_01238_dda (8, 26, 604, 608, 611, 640, 1193); 20090129_01239_dda (36, 549, 557, 1249); 20090129_01240_dda (676, 685, 1361); 20090129_01241_dda (32, 553, 562, 1276); 20090129_01242_dda (610, 1510)…	H = 21, M = 50, L = 9	gb|ADQ08583.1|Sap [Bacillus thuringiensis serovar pondicheriensis] 51.2 5e-04
TKDVEVKNYVLSTVAQNKLTELTATVTGNTKNLKPTDFAIKSEATNVVYPVSKVTVDSKDASKVTLTLFSELKDAATYDVTLDGITKTFVASDGKVASIALDKATIPYATETEIKLVSKDANGVIIKELKYGDTDNSYNFTIDTKGNGYTTGSKLYLNKIGDTAEATIEYKTGKYDQNGKAEGNIGPNKVTITAADQSAINDFKVRIDGANKKFDKAKDTNKIAAGETGKYAYFMIKDATGTEVSKYDYTVESSDKTVLMLASNTISSKSVGLTPVKQGTAYILFKDKDGKIVNSVAIDVTAGREAATLELDKYSVDASTSKTVAAKTVSVKVKDQYGDEVAASNYSNVHVSYLSGPVKNETAVAFDASKKAVVVTGSAFDASKTGAYVYKVAYTKDNK…	GL0054013_MH0020_C3137788_FWD_prot0566514 (Qin2010)	-	GL0002524_O2_sf57241_FWD_prot2221162 (Qin2010), GL0121925_O2_sf54348_FWD_prot1982994 (Qin2010)	7 | 69	2 | 2	2 | 2	-	6 | 67	3 | 43	6 | 24	-	-	-	20090129_01233_dda (603, 635); 20090129_01234_dda (576, 586, 1270); 20090129_01235_dda (603, 611); 20090129_01236_dda (536, 543, 1214); 20090129_01237_dda (559, 569, 1269); 20090129_01238_dda (604, 608, 611, 640, 1193); 20090129_01239_dda (549, 557, 1249); 20090129_01240_dda (676, 685, 1361); 20090129_01241_dda (553, 562, 1276); 20090129_01242_dda (610, 1510); 20090129_01253_dda (537, 546, 1221);…	H = 21, M = 37, L = 11	ref|YP_002951037.1| S-layer domain protein [Geobacillus sp. WCH70] 60.5 7e-07
STTKLTTTKKASSRAKITYTSSDETIATVSEDGTVKGVKAGKATITAKLTIGKDTATATQEVEVKNYVLSTVAQNKLTELTATVTGDTKNLKATDFAIKSEATKVVYPVSKVSVDSKDASKVTLTLFSELKDAATYDVTLDGITKTFVASDGKVASIALDKATIPYATETEVKLVSKDANGVVVKELKYGETDSNYDFTINTNGNGYTNGSKLYLNKVGDTATAEITYKTGKYDQNGKPEGNIGPNKVTITATAQSEVNNFAVRIDDTAKKFDKAKDTNKIAVNETKVAMFKIQNADNQEISDYSKYTFESSDKSVLMLASNKVGTNNSIAITALKNGTAYILVKKDDKVVGSVAIDIVAERAVATLDVDKSAVTLSQDLTNDTKKVNVTLKDQYGDKW…	GL0041223_MH0015_sf30517_FWD_prot0457608 (Qin2010)	-	GL0038367_V1_sf40645_FWD_prot2351268 (Qin2010), GL0019031_O2_sf20841_FWD_prot1975501 (Qin2010), GL0007103_V1_sf91_FWD_prot2379896 (Qin2010), GL0127393_MH0033_sf79683_FWD_prot0814601 (Qin2010)	6 | 62	1 | 1	1 | 1	-	5 | 61	5 | 55	2 | 6	-	-	-	20090129_01233_dda (9, 37, 635, 644); 20090129_01234_dda (33, 57, 576, 640, 1270); 20090129_01235_dda (603); 20090129_01236_dda (46, 536, 594, 1214); 20090129_01237_dda (39, 559, 623, 1269); 20090129_01238_dda (8, 26, 604, 608, 640, 651, 1193); 20090129_01239_dda (36, 549, 1249); 20090129_01240_dda (676, 1361); 20090129_01241_dda (32, 553, 616, 1276); 20090129_01242_dda (1510); 20090129_01253_dda…	H = 16, M = 41, L = 5	ref|YP_002748228.1| S-layer protein Sap [Bacillus cereus 03BB102] 51.6 2e-04
TTKLTNTKKNSSRAKITYTSSDDSIATVAADGTVTGVKAGKATITAKITVGKDSATTTKDVEVKNYVLSTVAQNKLTELTATVAGNTKNLKASDFTVKSEATNVVYPVSKVTVDSKDASKVTLTLFSELKDAATYDVTLDGITKTFVASDGKVASIALDKATIPYATETEIKLVSKDANGVIIKELKYGDTDNSYNFTIDTKGNGYTTGSKLYLNKIGDTAEATIEYKTGKYDQNGKAEGNIGPNKVTITAADQSAINDFKVRIDGANKKFDKAKDTNKIAAGETGKYAYFMIKDATGTEVSKYDYTVESSDKTVLMLASNTISSKSVGLTPVKQGTAYILFKDKDGKIVNSVAIDVTAGREAATLELDKYSVDASTSKTVAAKTVSVKVKDQYGDEVA…	GL0088556_MH0028_C2941906_FWD_prot0745583 (Qin2010)	-	GL0002524_O2_sf57241_FWD_prot2221162 (Qin2010), GL0121925_O2_sf54348_FWD_prot1982994 (Qin2010), GL0044437_MH0021_sf72651_FWD_prot0581245 (Qin2010)	7 | 56	2 | 8	1 | 1	1 | 7	5 | 45	2 | 28	5 | 17	1 | 3	-	1 | 3	20090129_01233_dda (635); 20090129_01234_dda (576, 1270); 20090129_01235_dda (603); 20090129_01236_dda (536, 1214); 20090129_01237_dda (559, 1269); 20090129_01238_dda (604, 608, 640, 1193); 20090129_01239_dda (549, 1249); 20090129_01240_dda (676, 1361); 20090129_01241_dda (553, 1276); 20090129_01242_dda (1510); 20090129_01253_dda (537, 1221); 20090129_01254_dda (538, 1244); 20090129_01255_dda (61…	H = 18, M = 28, L = 10	ref|YP_002951037.1|S-layer domain protein [Gebacillus sp. WCH7] 56.2 1e-05
MKVTKASVDLSGNSAVAVGSTTKLTTTKKASSRAKITYTSSDETIATVSEDGTVKGVKAGKATITAKLVIGKDTATATQEVEVKKYVLSTVAQNKLTELTATVTGDTKNLKATDFAIKSEATNVVYPVSKVTVDSKDASKVTLTLFSELKDAATYDVTLDGITKTFVASDGKVASIGLDTATVPYATETEVKLVSKDANGVIVKEMKLDETDANYSFTIDPKGNGYTNGSKLYLNKIGDTAEATIEYKTGKYDQNGKAEGNIGPNKVTITAADQAAVNGFAVRIDATGKKFDKAKDTNKIAKGETKAAYIKITDANGKEISSSEYAKYSVETSDKTTLMVSGSLASDPHYVTITAVKNGAAYLLIKKDNKVVGSVAIDVVAERTVATLELDKYSVTVSK…	GL0037423_MH0083_sf26717_FWD_prot1836615 (Qin2010)	-	GL0106393_MH0044_sf21873_FWD_prot1002630 (Qin2010), GL0121925_O2_sf54348_FWD_prot1982994 (Qin2010)	17 | 49	1 | 1	1 | 1	-	16 | 48	2 | 19	15 | 29	-	-	-	20090129_01233_dda (644); 20090129_01234_dda (640, 1270); 20090129_01236_dda (594, 1214); 20090129_01237_dda (623, 1269); 20090129_01238_dda (651, 1193); 20090129_01239_dda (1249); 20090129_01240_dda (1361); 20090129_01241_dda (616, 1276); 20090129_01242_dda (1510); 20090129_01253_dda (597, 1221); 20090129_01254_dda (604, 1244); 20090129_01255_dda (1316); 20090129_01256_dda (1239); 20090626_01676…	H = 27, M = 19, L = 3	ref|ZP_04221198.1| hypothetical protein bcere0021_7810 [Bacillus cereus Rock3-42]; ref|NP_843397.1|S-layer protein SAP [Bacillus anthracis str.] 58.2 4e-06
QNKLTELTATVAGDTKNLKVTDFAIKSEATNVVYPVSKVTVDSKDASKVTLTLFSELKDAATYDVTLDGITKTFVASDGKVASIGLDTPTVPYATETEVKLVSKDANGVVLKEMKTTDADANYSFTIDPKGNGYTNGSKLYLNKVGDTAEATIEYKTGKYDQNGKAEGNIGPNKVTITAVDQAAVNGFAVRIDATGKKFDKAKDTNKIAKGETKAAYIKITDANGKEVSDYYKYSVETSDKTTLMVSGSLASDPHYVTITAVKNGAAYLLIKKDNKVVGSVAIDVVAERTVATLELDKYSVTVSKSPVLKNAIPVKATVKDQYGDDIDATLTVECLSTDVKDLKAANVTSDIYYTYDGKKTVTFNYTADAGNYVYKISYKKDGKEVVAKTVSVAVKTVD…	GL0002049_MH0035_sf67637_FWD_prot0841917 (Qin2010)	-	GL0106393_MH0044_sf21873_FWD_prot1002630 (Qin2010)	14 | 37	1 | 1	1 | 1	-	13 | 36	1 | 11	13 | 25	-	-	-	20090129_01234_dda (1270); 20090129_01236_dda (1214); 20090129_01237_dda (1269); 20090129_01238_dda (1193); 20090129_01239_dda (1249); 20090129_01240_dda (1361); 20090129_01241_dda (1276); 20090129_01242_dda (1510); 20090129_01253_dda (1221); 20090129_01254_dda (1244); 20090129_01255_dda (1316); 20090129_01256_dda (1239); 20090626_01676 (547); 20090626_01677 (567); 20090702_01736 (556); 20090921_…	H = 22, M = 12, L = 3	gb|ADQ08583.1| Sap [Bacillus thuringiensis serovar pondicheriensis] 61.6 4e-07
PYATETEVKLVSKDANGVIVKEMKLDETDANYSFTIDPKGNGYTNGSKLYLNKIGDTAEATIEYKTGKYDQNGKPEGNIGPNKVTITAADQATVNGFAVRIDAAGKKFDKAKDTNKIAKGETKVAYIKITDANGKEVSDYNNYSVESSDKASLMVSGSLAADPHCVYITAVKNGAAYLLIKKENKIVGSVAIDIVAERTVATLELDKYSVTVSTSIDLKNAIPVKATVKDQYGDDIAATLTVECLSTDVSGLSATAVNADKKNTYFTYDGNKTVKFNYTAKPGNYVYKISYKKDGKEVVAKTVSVVVKAADASKVNGWRIDVSNVDLKVDKDNKAAKDVVLKVIGTNNGVDATEVKADSWEVKDKDGKQVTTTTSGSAIRIAAVGENSTVSGGAITALE…	GL0025145_V1_C4728463_FWD_prot2390427 (Qin2010)	-	GL0007103_V1_sf91_FWD_prot2379896 (Qin2010), GL0127393_MH0033_sf79683_FWD_prot0814601 (Qin2010), GL0121925_O2_sf54348_FWD_prot1982994 (Qin2010)	6 | 27	-	-	-	6 | 27	2 | 19	4 | 8	-	-	-	20090129_01233_dda (9, 37); 20090129_01234_dda (33, 57); 20090129_01236_dda (46); 20090129_01237_dda (39); 20090129_01238_dda (8, 26); 20090129_01239_dda (36); 20090129_01241_dda (32); 20090129_01253_dda (33); 20090129_01254_dda (34); 20090129_01255_dda (35); 20090129_01256_dda (34, 81, 102); 20090626_01675 (76); 20090626_01677 (693); 20090702_01735 (71, 83); 20090921_01918 (453, 553, 1160); 2009…	H = 11, M = 16, L = 0	ref|ZP_04221198.1| hypothetical protein bcere0021_7810 [Bacillus cereus Rock3-42] 50.8 4e-04; sp|Q9ZES5.1|SLAP_BACTF RecName: Full=S-layer protein 47.4 0.005
GSVNQVLSREKAAQMCLNALEAPMVTYDTKGSTIVVDGTKINFGASVAKYETSTVAKDQNISKEKLTSGEYTVELGEKLYKDLKKNSTTDAFERPATEWMLKAKSIGTYADAADLSYTATVEIGTIYSDLGLSKGIDDSKVTYYEDGRNLSSSWTQDIVKGSKVEKGGNGTLLEVYYNDDAESLTVIAINTYVGKITASYKASTTKDAYVTFTAKTGAGSSYETDDSYSKDDIVLYTYSGKAGDAGVKSMALAEKVTGKMNGFTAEKNVTVDGTTYKKSANGTSITPGMNTSVGKDVSVYLDQYGYAAFVDADDTLQYAVILAYEKGSRLDSPRAKLLFTDGTTKKVDVKALKKDNSTASSSAGSSLPGYASANSELNKYDVVSYTVNSDEEYTLTLAA…	GL0136760_V1_sf91228_FWD_prot2726761 (Qin2010)	GL0083279_O2_sf12554_FWD_prot2090027 (Qin2010), GL0018292_MH0050_sf8085_FWD_prot1087589 (Qin2010), GL0056131_MH0002_sf5210_FWD_prot0005488 (Qin2010), GL0059493_MH0014_sf23107_FWD_prot0431852 (Qin2010), GL0117402_MH0043_sf84924_FWD_prot0986479 (Qin2010), GL0036885_MH0075_sf53393_FWD_prot1639425 (Qin2010)	-	1 | 2	-	-	-	1 | 2	-	1 | 2	-	-	-	20090921_01918 (1718); 20090924_01938 (1632)	H = 2, M = 0, L = 0	ref|ZP_07635719.1| S-layer domain protein [Ruminococcaceae bacterium D16] 216 1e-53
