# Supplementary material for: Comparative Metaproteomics and Diversity Analysis of Human Intestinal Microbiota Testifies for Its Temporal Stability and Expression of Core Functions
Source: PLoS One. 2012 Jan 18;7(1):e29913. doi: 10.1371/journal.pone.0029913 (PMC3261163; doi:10.1371/journal.pone.0029913)
Supplement: Table S5 — Peptides with phylogenetic assignment. Interest in the raw data should be addressed to the corresponding author. (XLSX) [file pone.0029913.s010.xlsx]

## Sheet: A1
Peptide	COG	Functional category	Group	Phylum	Class	Order	Family	Genus	Species
SHHEVAGAGQQEXNYR	COG0174 Glutamine synthetase	E	Bacteria	Actinobacteria	Actinobacteria	Bifidobacteriales	Bifidobacteriaceae	Bifidobacterium
SHHEVAGAGQQEXNYR	COG0174 Glutamine synthetase	E	Bacteria	Actinobacteria	Actinobacteria	Bifidobacteriales	Bifidobacteriaceae	Bifidobacterium
AAAXNTXPHSTGAAK	COG0057 Glyceraldehyde-3-phosphate dehydrogenase/erythrose-4-phosphate dehydrogenase	G	Bacteria	Actinobacteria	Actinobacteria	Bifidobacteriales	Bifidobacteriaceae	Bifidobacterium
AAAXNTXPHSTGAAK	COG0057 Glyceraldehyde-3-phosphate dehydrogenase/erythrose-4-phosphate dehydrogenase	G	Bacteria	Actinobacteria	Actinobacteria	Bifidobacteriales	Bifidobacteriaceae	Bifidobacterium
XXEATKSDHXESVK	COG2115 Xylose isomerase	G	Bacteria	Actinobacteria	Actinobacteria	Bifidobacteriales	Bifidobacteriaceae	Bifidobacterium
XXEATKSDHXESVK	COG2115 Xylose isomerase	G	Bacteria	Actinobacteria	Actinobacteria	Bifidobacteriales	Bifidobacteriaceae	Bifidobacterium
AAAXNTXAHSTGAAK	COG0057 Glyceraldehyde-3-phosphate dehydrogenase/erythrose-4-phosphate dehydrogenase	G	Bacteria	Actinobacteria	Actinobacteria	Bifidobacteriales	Bifidobacteriaceae	Bifidobacterium
KVVVGHYTDPEVAEK	COG2160 L-arabinose isomerase	G	Bacteria	Actinobacteria	Actinobacteria	Bifidobacteriales	Bifidobacteriaceae	Bifidobacterium
XGAEAVAGXKK	COG0021 Transketolase	G	Bacteria	Actinobacteria	Actinobacteria	Bifidobacteriales	Bifidobacteriaceae	Bifidobacterium
VXENXQAER	COG2115 Xylose isomerase	G	Bacteria	Actinobacteria	Actinobacteria	Bifidobacteriales	Bifidobacteriaceae	Bifidobacterium
XQAAYDVTNK	COG3957 Phosphoketolase	G	Bacteria	Actinobacteria	Actinobacteria	Bifidobacteriales	Bifidobacteriaceae	Bifidobacterium
TEFKETEXDER	COG0021 Transketolase	G	Bacteria	Actinobacteria	Actinobacteria	Bifidobacteriales	Bifidobacteriaceae	Bifidobacterium
TEFKETEXDER	COG0021 Transketolase	G	Bacteria	Actinobacteria	Actinobacteria	Bifidobacteriales	Bifidobacteriaceae	Bifidobacterium
MHEDKVXENXQAER	COG2115 Xylose isomerase	G	Bacteria	Actinobacteria	Actinobacteria	Bifidobacteriales	Bifidobacteriaceae	Bifidobacterium
MHEDKVXENXQAER	COG2115 Xylose isomerase	G	Bacteria	Actinobacteria	Actinobacteria	Bifidobacteriales	Bifidobacteriaceae	Bifidobacterium
YSDPEDEAXAK	COG2115 Xylose isomerase	G	Bacteria	Actinobacteria	Actinobacteria	Bifidobacteriales	Bifidobacteriaceae	Bifidobacterium	Bifidobacterium adolescentis
XADAGXVAVGHR	COG0282 Acetate kinase	C	Bacteria	Actinobacteria	Actinobacteria	Bifidobacteriales	Bifidobacteriaceae	Bifidobacterium	Bifidobacterium adolescentis
XRDEYSGVXTGK	COG0334 Glutamate dehydrogenase/leucine dehydrogenase	E	Bacteria	Actinobacteria	Actinobacteria	Bifidobacteriales	Bifidobacteriaceae	Bifidobacterium
XRDEYSGVXTGK	COG0334 Glutamate dehydrogenase/leucine dehydrogenase	E	Bacteria	Actinobacteria	Actinobacteria	Bifidobacteriales	Bifidobacteriaceae	Bifidobacterium
VAWTDDEGKVQVNR	COG0334 Glutamate dehydrogenase/leucine dehydrogenase	E	Bacteria	Actinobacteria	Actinobacteria	Bifidobacteriales	Bifidobacteriaceae	Bifidobacterium
TGPDGGSAVAVXK	COG1653 ABC-type sugar transport system, periplasmic component	G	Bacteria	Actinobacteria	Actinobacteria	Bifidobacteriales	Bifidobacteriaceae	Bifidobacterium	Bifidobacterium longum
AXHEVGPYDPQXK	COG0176 Transaldolase	G	Bacteria	Actinobacteria	Actinobacteria	Bifidobacteriales	Bifidobacteriaceae	Bifidobacterium
XGAANSXXVK	COG0148 Enolase	G	Bacteria	Actinobacteria	Actinobacteria	Bifidobacteriales	Bifidobacteriaceae	Bifidobacterium	Bifidobacterium adolescentis
NYGGXSDXAR	COG0174 Glutamine synthetase	E	Bacteria	Actinobacteria	Actinobacteria	Bifidobacteriales	Bifidobacteriaceae	Bifidobacterium
VGGGVXEXR	COG3507 Beta-xylosidase	G	Bacteria	Actinobacteria	Actinobacteria	Bifidobacteriales	Bifidobacteriaceae	Bifidobacterium
EAGVXGSXDANQGDK	COG2115 Xylose isomerase	G	Bacteria	Actinobacteria	Actinobacteria	Bifidobacteriales	Bifidobacteriaceae	Bifidobacterium
XAXDXYVHR	COG0282 Acetate kinase	C	Bacteria	Actinobacteria	Actinobacteria	Bifidobacteriales	Bifidobacteriaceae	Bifidobacterium
RTSFAAEDXFR	COG2115 Xylose isomerase	G	Bacteria	Actinobacteria	Actinobacteria	Bifidobacteriales	Bifidobacteriaceae	Bifidobacterium
RTSFAAEDXFR	COG2115 Xylose isomerase	G	Bacteria	Actinobacteria	Actinobacteria	Bifidobacteriales	Bifidobacteriaceae	Bifidobacterium
EVTADEXNAAFK	COG0057 Glyceraldehyde-3-phosphate dehydrogenase/erythrose-4-phosphate dehydrogenase	G	Bacteria	Actinobacteria	Actinobacteria	Bifidobacteriales	Bifidobacteriaceae	Bifidobacterium
RTSFTAEDXFR	COG2115 Xylose isomerase	G	Bacteria	Actinobacteria	Actinobacteria	Bifidobacteriales	Bifidobacteriaceae	Bifidobacterium	Bifidobacterium adolescentis
DGDQPEFXQAVR	COG0334 Glutamate dehydrogenase/leucine dehydrogenase	E	Bacteria	Actinobacteria	Actinobacteria	Bifidobacteriales	Bifidobacteriaceae	Bifidobacterium
VXXSAPAKDETTPTXVFGVNHETXK	COG0057 Glyceraldehyde-3-phosphate dehydrogenase/erythrose-4-phosphate dehydrogenase	G	Bacteria	Actinobacteria	Actinobacteria	Bifidobacteriales	Bifidobacteriaceae	Bifidobacterium	Bifidobacterium adolescentis
TSFAAEDXFR	COG2115 Xylose isomerase	G	Bacteria	Actinobacteria	Actinobacteria	Bifidobacteriales	Bifidobacteriaceae	Bifidobacterium
GXWDVDKXEYVGR	COG2115 Xylose isomerase	G	Bacteria	Actinobacteria	Actinobacteria	Bifidobacteriales	Bifidobacteriaceae	Bifidobacterium
XGNXTVXFDANR	COG0021 Transketolase	G	Bacteria	Actinobacteria	Actinobacteria	Bifidobacteriales	Bifidobacteriaceae	Bifidobacterium
AXDDXEATFEVGK	COG0021 Transketolase	G	Bacteria	Actinobacteria	Actinobacteria	Bifidobacteriales	Bifidobacteriaceae	Bifidobacterium
VDYAFEXFQK	COG2115 Xylose isomerase	G	Bacteria	Actinobacteria	Actinobacteria	Bifidobacteriales	Bifidobacteriaceae	Bifidobacterium
VDYAFEFFQK	COG2115 Xylose isomerase	G	Bacteria	Actinobacteria	Actinobacteria	Bifidobacteriales	Bifidobacteriaceae	Bifidobacterium
GXWDXDKXPYVGR	COG2115 Xylose isomerase	G	Bacteria	Actinobacteria	Actinobacteria	Bifidobacteriales	Bifidobacteriaceae	Bifidobacterium
XVPDVSTAFXDPFRK	COG0174 Glutamine synthetase	E	Bacteria	Actinobacteria	Actinobacteria	Bifidobacteriales	Bifidobacteriaceae	Bifidobacterium
AGGXTGXXGEXDR	COG0129 Dihydroxyacid dehydratase/phosphogluconate dehydratase	EG	Bacteria	Actinobacteria	Actinobacteria	Bifidobacteriales	Bifidobacteriaceae	Bifidobacterium
VXGFFDEFGPK	COG0282 Acetate kinase	C	Bacteria	Actinobacteria	Actinobacteria	Bifidobacteriales	Bifidobacteriaceae	Bifidobacterium
NXXKPETXQXFADXAK	COG0166 Glucose-6-phosphate isomerase	G	Bacteria	Actinobacteria	Actinobacteria	Bifidobacteriales	Bifidobacteriaceae	Bifidobacterium
SGEAPDXAQVGYAEXPEVFTK	COG1653 ABC-type sugar transport system, periplasmic component	G	Bacteria	Actinobacteria	Actinobacteria	Bifidobacteriales	Bifidobacteriaceae	Bifidobacterium	Bifidobacterium longum
FVSGASTSPFADXYAYAGGQXK	COG2115 Xylose isomerase	G	Bacteria	Actinobacteria	Actinobacteria	Bifidobacteriales	Bifidobacteriaceae	Bifidobacterium
XGXTEXPQTADEFXAAAK	COG1653 ABC-type sugar transport system, periplasmic component	G	Bacteria	Actinobacteria	Actinobacteria	Bifidobacteriales	Bifidobacteriaceae	Bifidobacterium	Bifidobacterium longum
XNQXGTVTETXDAXEXATK	COG0148 Enolase	G	Bacteria	Actinobacteria	Actinobacteria	Bifidobacteriales	Bifidobacteriaceae	Bifidobacterium
XNQXGTVTETXDAXEXATK	COG0148 Enolase	G	Bacteria	Actinobacteria	Actinobacteria	Bifidobacteriales	Bifidobacteriaceae	Bifidobacterium
YSDPEDEAXAKVDYAFEFFQK	COG2115 Xylose isomerase	G	Bacteria	Actinobacteria	Actinobacteria	Bifidobacteriales	Bifidobacteriaceae	Bifidobacterium	Bifidobacterium adolescentis
AGEXPEGFDKAXDDXEATFEVGK	COG0021 Transketolase	G	Bacteria	Actinobacteria	Actinobacteria	Bifidobacteriales	Bifidobacteriaceae	Bifidobacterium
XGANAXXGVSXAAXYASAESADQPXYR	COG0148 Enolase	G	Bacteria	Actinobacteria	Actinobacteria	Bifidobacteriales	Bifidobacteriaceae	Bifidobacterium	Bifidobacterium adolescentis
SHHEVAGAGQQEXNYR	COG0174 Glutamine synthetase	E	Bacteria	Actinobacteria	Actinobacteria	Bifidobacteriales	Bifidobacteriaceae	Bifidobacterium
AAAXNTXPHSTGAAK	COG0057 Glyceraldehyde-3-phosphate dehydrogenase/erythrose-4-phosphate dehydrogenase	G	Bacteria	Actinobacteria	Actinobacteria	Bifidobacteriales	Bifidobacteriaceae	Bifidobacterium
XXEATKSDHXESVK	COG2115 Xylose isomerase	G	Bacteria	Actinobacteria	Actinobacteria	Bifidobacteriales	Bifidobacteriaceae	Bifidobacterium
XXEATKSDHXESVK	COG2115 Xylose isomerase	G	Bacteria	Actinobacteria	Actinobacteria	Bifidobacteriales	Bifidobacteriaceae	Bifidobacterium
AAAXNTXAHSTGAAK	COG0057 Glyceraldehyde-3-phosphate dehydrogenase/erythrose-4-phosphate dehydrogenase	G	Bacteria	Actinobacteria	Actinobacteria	Bifidobacteriales	Bifidobacteriaceae	Bifidobacterium
KVVVGHYTDPEVAEK	COG2160 L-arabinose isomerase	G	Bacteria	Actinobacteria	Actinobacteria	Bifidobacteriales	Bifidobacteriaceae	Bifidobacterium
XGAEAVAGXKK	COG0021 Transketolase	G	Bacteria	Actinobacteria	Actinobacteria	Bifidobacteriales	Bifidobacteriaceae	Bifidobacterium
TEFKETEXDER	COG0021 Transketolase	G	Bacteria	Actinobacteria	Actinobacteria	Bifidobacteriales	Bifidobacteriaceae	Bifidobacterium
TEFKETEXDER	COG0021 Transketolase	G	Bacteria	Actinobacteria	Actinobacteria	Bifidobacteriales	Bifidobacteriaceae	Bifidobacterium
MHEDKVXENXQAER	COG2115 Xylose isomerase	G	Bacteria	Actinobacteria	Actinobacteria	Bifidobacteriales	Bifidobacteriaceae	Bifidobacterium
YSDPEDEAXAK	COG2115 Xylose isomerase	G	Bacteria	Actinobacteria	Actinobacteria	Bifidobacteriales	Bifidobacteriaceae	Bifidobacterium	Bifidobacterium adolescentis
XADAGXVAVGHR	COG0282 Acetate kinase	C	Bacteria	Actinobacteria	Actinobacteria	Bifidobacteriales	Bifidobacteriaceae	Bifidobacterium	Bifidobacterium adolescentis
MHEDKVXENXQAER	COG2115 Xylose isomerase	G	Bacteria	Actinobacteria	Actinobacteria	Bifidobacteriales	Bifidobacteriaceae	Bifidobacterium
XRDEYSGVXTGK	COG0334 Glutamate dehydrogenase/leucine dehydrogenase	E	Bacteria	Actinobacteria	Actinobacteria	Bifidobacteriales	Bifidobacteriaceae	Bifidobacterium
XRDEYSGVXTGK	COG0334 Glutamate dehydrogenase/leucine dehydrogenase	E	Bacteria	Actinobacteria	Actinobacteria	Bifidobacteriales	Bifidobacteriaceae	Bifidobacterium
TGPDGGSAVAVXK	COG1653 ABC-type sugar transport system, periplasmic component	G	Bacteria	Actinobacteria	Actinobacteria	Bifidobacteriales	Bifidobacteriaceae	Bifidobacterium	Bifidobacterium longum
AXHEVGPYDPQXK	COG0176 Transaldolase	G	Bacteria	Actinobacteria	Actinobacteria	Bifidobacteriales	Bifidobacteriaceae	Bifidobacterium
XGAANSXXVK	COG0148 Enolase	G	Bacteria	Actinobacteria	Actinobacteria	Bifidobacteriales	Bifidobacteriaceae	Bifidobacterium	Bifidobacterium adolescentis
NYGGXSDXAR	COG0174 Glutamine synthetase	E	Bacteria	Actinobacteria	Actinobacteria	Bifidobacteriales	Bifidobacteriaceae	Bifidobacterium
EAGVXGSXDANQGDK	COG2115 Xylose isomerase	G	Bacteria	Actinobacteria	Actinobacteria	Bifidobacteriales	Bifidobacteriaceae	Bifidobacterium
QGXNTGXGDEGGFAPK	COG0148 Enolase	G	Bacteria	Actinobacteria	Actinobacteria	Bifidobacteriales	Bifidobacteriaceae	Bifidobacterium	Bifidobacterium adolescentis
RTSFAAEDXFR	COG2115 Xylose isomerase	G	Bacteria	Actinobacteria	Actinobacteria	Bifidobacteriales	Bifidobacteriaceae	Bifidobacterium
RTSFTAEDXFR	COG2115 Xylose isomerase	G	Bacteria	Actinobacteria	Actinobacteria	Bifidobacteriales	Bifidobacteriaceae	Bifidobacterium	Bifidobacterium adolescentis
RTSFTAEDXFR	COG2115 Xylose isomerase	G	Bacteria	Actinobacteria	Actinobacteria	Bifidobacteriales	Bifidobacteriaceae	Bifidobacterium	Bifidobacterium adolescentis
EVTADEXNAAFK	COG0057 Glyceraldehyde-3-phosphate dehydrogenase/erythrose-4-phosphate dehydrogenase	G	Bacteria	Actinobacteria	Actinobacteria	Bifidobacteriales	Bifidobacteriaceae	Bifidobacterium
YDVDPAXXDAK	COG2160 L-arabinose isomerase	G	Bacteria	Actinobacteria	Actinobacteria	Bifidobacteriales	Bifidobacteriaceae	Bifidobacterium
ADAEAXXNQEGXEYVSVR	COG0174 Glutamine synthetase	E	Bacteria	Actinobacteria	Actinobacteria	Bifidobacteriales	Bifidobacteriaceae	Bifidobacterium
XAGVEXAVXDENTNAR	COG2160 L-arabinose isomerase	G	Bacteria	Actinobacteria	Actinobacteria	Bifidobacteriales	Bifidobacteriaceae	Bifidobacterium	Bifidobacterium adolescentis
TSFAAEDXFR	COG2115 Xylose isomerase	G	Bacteria	Actinobacteria	Actinobacteria	Bifidobacteriales	Bifidobacteriaceae	Bifidobacterium
AXDXGAANSXXVK	COG0148 Enolase	G	Bacteria	Actinobacteria	Actinobacteria	Bifidobacteriales	Bifidobacteriaceae	Bifidobacterium
XGNXTVXFDANR	COG0021 Transketolase	G	Bacteria	Actinobacteria	Actinobacteria	Bifidobacteriales	Bifidobacteriaceae	Bifidobacterium
VDYAFEFFQK	COG2115 Xylose isomerase	G	Bacteria	Actinobacteria	Actinobacteria	Bifidobacteriales	Bifidobacteriaceae	Bifidobacterium
GXWDXDKXPYVGR	COG2115 Xylose isomerase	G	Bacteria	Actinobacteria	Actinobacteria	Bifidobacteriales	Bifidobacteriaceae	Bifidobacterium
AGGXTGXXGEXDR	COG0129 Dihydroxyacid dehydratase/phosphogluconate dehydratase	EG	Bacteria	Actinobacteria	Actinobacteria	Bifidobacteriales	Bifidobacteriaceae	Bifidobacterium
VXGFFDEFGPK	COG0282 Acetate kinase	C	Bacteria	Actinobacteria	Actinobacteria	Bifidobacteriales	Bifidobacteriaceae	Bifidobacterium
FVSGASTSPFADXYAYAGGQXK	COG2115 Xylose isomerase	G	Bacteria	Actinobacteria	Actinobacteria	Bifidobacteriales	Bifidobacteriaceae	Bifidobacterium
GAWDXXQPYFEK	COG4213 ABC-type xylose transport system, periplasmic component	G	Bacteria	Actinobacteria	Actinobacteria	Bifidobacteriales	Bifidobacteriaceae	Bifidobacterium
XNQXGTVTETXDAXEXATK	COG0148 Enolase	G	Bacteria	Actinobacteria	Actinobacteria	Bifidobacteriales	Bifidobacteriaceae	Bifidobacterium
XNQXGTVTETXDAXEXATK	COG0148 Enolase	G	Bacteria	Actinobacteria	Actinobacteria	Bifidobacteriales	Bifidobacteriaceae	Bifidobacterium
YSDPEDEAXAKVDYAFEFFQK	COG2115 Xylose isomerase	G	Bacteria	Actinobacteria	Actinobacteria	Bifidobacteriales	Bifidobacteriaceae	Bifidobacterium	Bifidobacterium adolescentis
AGEXPEGFDKAXDDXEATFEVGK	COG0021 Transketolase	G	Bacteria	Actinobacteria	Actinobacteria	Bifidobacteriales	Bifidobacteriaceae	Bifidobacterium
GGQAGDXEVAAXNDXTTPATXAYXXK	COG0057 Glyceraldehyde-3-phosphate dehydrogenase/erythrose-4-phosphate dehydrogenase	G	Bacteria	Actinobacteria	Actinobacteria	Bifidobacteriales	Bifidobacteriaceae	Bifidobacterium
XGANAXXGVSXAAXYASAESADQPXYR	COG0148 Enolase	G	Bacteria	Actinobacteria	Actinobacteria	Bifidobacteriales	Bifidobacteriaceae	Bifidobacterium	Bifidobacterium adolescentis
XGANAXXGVSXAAXYASAESADQPXYR	COG0148 Enolase	G	Bacteria	Actinobacteria	Actinobacteria	Bifidobacteriales	Bifidobacteriaceae	Bifidobacterium	Bifidobacterium adolescentis
FAEXFETVFDEXCDXK	COG3957 Phosphoketolase	G	Bacteria	Actinobacteria	Actinobacteria	Bifidobacteriales	Bifidobacteriaceae	Bifidobacterium
FAEXFETVFDEXCDXK	COG3957 Phosphoketolase	G	Bacteria	Actinobacteria	Actinobacteria	Bifidobacteriales	Bifidobacteriaceae	Bifidobacterium
SHHEVAGAGQQEXNYR	COG0174 Glutamine synthetase	E	Bacteria	Actinobacteria	Actinobacteria	Bifidobacteriales	Bifidobacteriaceae	Bifidobacterium
KVVVGHYTDPEVAEK	COG2160 L-arabinose isomerase	G	Bacteria	Actinobacteria	Actinobacteria	Bifidobacteriales	Bifidobacteriaceae	Bifidobacterium
XGAEAVAGXKK	COG0021 Transketolase	G	Bacteria	Actinobacteria	Actinobacteria	Bifidobacteriales	Bifidobacteriaceae	Bifidobacterium
XQAAYDVTNK	COG3957 Phosphoketolase	G	Bacteria	Actinobacteria	Actinobacteria	Bifidobacteriales	Bifidobacteriaceae	Bifidobacterium
XQAAYDVTNK	COG3957 Phosphoketolase	G	Bacteria	Actinobacteria	Actinobacteria	Bifidobacteriales	Bifidobacteriaceae	Bifidobacterium
TEFKETEXDER	COG0021 Transketolase	G	Bacteria	Actinobacteria	Actinobacteria	Bifidobacteriales	Bifidobacteriaceae	Bifidobacterium
XQAAYDVTNK	COG3957 Phosphoketolase	G	Bacteria	Actinobacteria	Actinobacteria	Bifidobacteriales	Bifidobacteriaceae	Bifidobacterium
VQRPXWASTGTK	COG0176 Transaldolase	G	Bacteria	Actinobacteria	Actinobacteria	Bifidobacteriales	Bifidobacteriaceae	Bifidobacterium
ADAEAXXNK	COG0174 Glutamine synthetase	E	Bacteria	Actinobacteria	Actinobacteria	Bifidobacteriales	Bifidobacteriaceae	Bifidobacterium
MHEDKVXENXQAER	COG2115 Xylose isomerase	G	Bacteria	Actinobacteria	Actinobacteria	Bifidobacteriales	Bifidobacteriaceae	Bifidobacterium
YSDPEDEAXAK	COG2115 Xylose isomerase	G	Bacteria	Actinobacteria	Actinobacteria	Bifidobacteriales	Bifidobacteriaceae	Bifidobacterium	Bifidobacterium adolescentis
XADAGXVAVGHR	COG0282 Acetate kinase	C	Bacteria	Actinobacteria	Actinobacteria	Bifidobacteriales	Bifidobacteriaceae	Bifidobacterium	Bifidobacterium adolescentis
XRDEYSGVXTGK	COG0334 Glutamate dehydrogenase/leucine dehydrogenase	E	Bacteria	Actinobacteria	Actinobacteria	Bifidobacteriales	Bifidobacteriaceae	Bifidobacterium
XRDEYSGVXTGK	COG0334 Glutamate dehydrogenase/leucine dehydrogenase	E	Bacteria	Actinobacteria	Actinobacteria	Bifidobacteriales	Bifidobacteriaceae	Bifidobacterium
MHEDKVXENXQAER	COG2115 Xylose isomerase	G	Bacteria	Actinobacteria	Actinobacteria	Bifidobacteriales	Bifidobacteriaceae	Bifidobacterium
TGPDGGSAVAVXK	COG1653 ABC-type sugar transport system, periplasmic component	G	Bacteria	Actinobacteria	Actinobacteria	Bifidobacteriales	Bifidobacteriaceae	Bifidobacterium	Bifidobacterium longum
AXHEVGPYDPQXK	COG0176 Transaldolase	G	Bacteria	Actinobacteria	Actinobacteria	Bifidobacteriales	Bifidobacteriaceae	Bifidobacterium
XGAANSXXVK	COG0148 Enolase	G	Bacteria	Actinobacteria	Actinobacteria	Bifidobacteriales	Bifidobacteriaceae	Bifidobacterium	Bifidobacterium adolescentis
EKGPQEGXAFHYYDADK	COG2115 Xylose isomerase	G	Bacteria	Actinobacteria	Actinobacteria	Bifidobacteriales	Bifidobacteriaceae	Bifidobacterium
EAGVXGSXDANQGDK	COG2115 Xylose isomerase	G	Bacteria	Actinobacteria	Actinobacteria	Bifidobacteriales	Bifidobacteriaceae	Bifidobacterium
HSSSVXAFTNPSXNSYHR	COG0174 Glutamine synthetase	E	Bacteria	Actinobacteria	Actinobacteria	Bifidobacteriales	Bifidobacteriaceae	Bifidobacterium
DAVVVSMSDVR	COG2160 L-arabinose isomerase	G	Bacteria	Actinobacteria	Actinobacteria	Bifidobacteriales	Bifidobacteriaceae	Bifidobacterium
HDDGTPVEVTSTDDSXVVDGK	COG0057 Glyceraldehyde-3-phosphate dehydrogenase/erythrose-4-phosphate dehydrogenase	G	Bacteria	Actinobacteria	Actinobacteria	Bifidobacteriales	Bifidobacteriaceae	Bifidobacterium	Bifidobacterium adolescentis
QGXNTGXGDEGGFAPK	COG0148 Enolase	G	Bacteria	Actinobacteria	Actinobacteria	Bifidobacteriales	Bifidobacteriaceae	Bifidobacterium	Bifidobacterium adolescentis
RTSFAAEDXFR	COG2115 Xylose isomerase	G	Bacteria	Actinobacteria	Actinobacteria	Bifidobacteriales	Bifidobacteriaceae	Bifidobacterium
RTSFAAEDXFR	COG2115 Xylose isomerase	G	Bacteria	Actinobacteria	Actinobacteria	Bifidobacteriales	Bifidobacteriaceae	Bifidobacterium
RTSFTAEDXFR	COG2115 Xylose isomerase	G	Bacteria	Actinobacteria	Actinobacteria	Bifidobacteriales	Bifidobacteriaceae	Bifidobacterium	Bifidobacterium adolescentis
DGDQPEFXQAVR	COG0334 Glutamate dehydrogenase/leucine dehydrogenase	E	Bacteria	Actinobacteria	Actinobacteria	Bifidobacteriales	Bifidobacteriaceae	Bifidobacterium
AXPQXEVARPADAYETAEAYR	COG0021 Transketolase	G	Bacteria	Actinobacteria	Actinobacteria	Bifidobacteriales	Bifidobacteriaceae	Bifidobacterium	Bifidobacterium adolescentis
TSFAAEDXFR	COG2115 Xylose isomerase	G	Bacteria	Actinobacteria	Actinobacteria	Bifidobacteriales	Bifidobacteriaceae	Bifidobacterium
VADXFSDAQTTSVDTXK	COG1653 ABC-type sugar transport system, periplasmic component	G	Bacteria	Actinobacteria	Actinobacteria	Bifidobacteriales	Bifidobacteriaceae	Bifidobacterium	Bifidobacterium longum
AXDDXEATFEVGK	COG0021 Transketolase	G	Bacteria	Actinobacteria	Actinobacteria	Bifidobacteriales	Bifidobacteriaceae	Bifidobacterium
XGNXTVXFDANR	COG0021 Transketolase	G	Bacteria	Actinobacteria	Actinobacteria	Bifidobacteriales	Bifidobacteriaceae	Bifidobacterium
ATADFYQQXXDAK	COG1653 ABC-type sugar transport system, periplasmic component	G	Bacteria	Actinobacteria	Actinobacteria	Bifidobacteriales	Bifidobacteriaceae	Bifidobacterium	Bifidobacterium longum
SHXAGMDSFAAGXXVAAK	COG2115 Xylose isomerase	G	Bacteria	Actinobacteria	Actinobacteria	Bifidobacteriales	Bifidobacteriaceae	Bifidobacterium
XQVPDGSVTEXTTVXNK	COG0057 Glyceraldehyde-3-phosphate dehydrogenase/erythrose-4-phosphate dehydrogenase	G	Bacteria	Actinobacteria	Actinobacteria	Bifidobacteriales	Bifidobacteriaceae	Bifidobacterium
VDYAFEFFQK	COG2115 Xylose isomerase	G	Bacteria	Actinobacteria	Actinobacteria	Bifidobacteriales	Bifidobacteriaceae	Bifidobacterium
GXWDXDKXPYVGR	COG2115 Xylose isomerase	G	Bacteria	Actinobacteria	Actinobacteria	Bifidobacteriales	Bifidobacteriaceae	Bifidobacterium
TYDXMDVFK	COG2115 Xylose isomerase	G	Bacteria	Actinobacteria	Actinobacteria	Bifidobacteriales	Bifidobacteriaceae	Bifidobacterium	Bifidobacterium adolescentis
YQXVDXETGEGXASGXVEK	COG0282 Acetate kinase	C	Bacteria	Actinobacteria	Actinobacteria	Bifidobacteriales	Bifidobacteriaceae	Bifidobacterium
AYGXPQDTGPXVYFYNK	COG1653 ABC-type sugar transport system, periplasmic component	G	Bacteria	Actinobacteria	Actinobacteria	Bifidobacteriales	Bifidobacteriaceae	Bifidobacterium	Bifidobacterium longum
VXGFFDEFGPK	COG0282 Acetate kinase	C	Bacteria	Actinobacteria	Actinobacteria	Bifidobacteriales	Bifidobacteriaceae	Bifidobacterium
NXXKPETXQXFADXAK	COG0166 Glucose-6-phosphate isomerase	G	Bacteria	Actinobacteria	Actinobacteria	Bifidobacteriales	Bifidobacteriaceae	Bifidobacterium
EXWFGVGSQDXYGEEAXR	COG2160 L-arabinose isomerase	G	Bacteria	Actinobacteria	Actinobacteria	Bifidobacteriales	Bifidobacteriaceae	Bifidobacterium
SGEAPDXAQVGYAEXPEVFTK	COG1653 ABC-type sugar transport system, periplasmic component	G	Bacteria	Actinobacteria	Actinobacteria	Bifidobacteriales	Bifidobacteriaceae	Bifidobacterium	Bifidobacterium longum
XGXTEXPQTADEFXAAAK	COG1653 ABC-type sugar transport system, periplasmic component	G	Bacteria	Actinobacteria	Actinobacteria	Bifidobacteriales	Bifidobacteriaceae	Bifidobacterium	Bifidobacterium longum
FVSGASTSPFADXYAYAGGQXK	COG2115 Xylose isomerase	G	Bacteria	Actinobacteria	Actinobacteria	Bifidobacteriales	Bifidobacteriaceae	Bifidobacterium
FVSGASTSPFADXYAYAGGQXK	COG2115 Xylose isomerase	G	Bacteria	Actinobacteria	Actinobacteria	Bifidobacteriales	Bifidobacteriaceae	Bifidobacterium
SXMEEXVANSXAAAK	COG0334 Glutamate dehydrogenase/leucine dehydrogenase	E	Bacteria	Actinobacteria	Actinobacteria	Bifidobacteriales	Bifidobacteriaceae	Bifidobacterium
GAWDXXQPYFEK	COG4213 ABC-type xylose transport system, periplasmic component	G	Bacteria	Actinobacteria	Actinobacteria	Bifidobacteriales	Bifidobacteriaceae	Bifidobacterium
AVAQAXVDATAAGAFTXVGGGDSASAVR	COG0126 3-phosphoglycerate kinase	G	Bacteria	Actinobacteria	Actinobacteria	Bifidobacteriales	Bifidobacteriaceae	Bifidobacterium	Bifidobacterium adolescentis
GXDPETTXFXXVSK	COG0166 Glucose-6-phosphate isomerase	G	Bacteria	Actinobacteria	Actinobacteria	Bifidobacteriales	Bifidobacteriaceae	Bifidobacterium
XNQXGTVTETXDAXEXATK	COG0148 Enolase	G	Bacteria	Actinobacteria	Actinobacteria	Bifidobacteriales	Bifidobacteriaceae	Bifidobacterium
XNQXGTVTETXDAXEXATK	COG0148 Enolase	G	Bacteria	Actinobacteria	Actinobacteria	Bifidobacteriales	Bifidobacteriaceae	Bifidobacterium
DSXNYXMDAXSAAGYEPGK	COG0148 Enolase	G	Bacteria	Actinobacteria	Actinobacteria	Bifidobacteriales	Bifidobacteriaceae	Bifidobacterium
XADAVYDMVVEXAEGK	COG4213 ABC-type xylose transport system, periplasmic component	G	Bacteria	Actinobacteria	Actinobacteria	Bifidobacteriales	Bifidobacteriaceae	Bifidobacterium
GGQAGDXEVAAXNDXTTPATXAYXXK	COG0057 Glyceraldehyde-3-phosphate dehydrogenase/erythrose-4-phosphate dehydrogenase	G	Bacteria	Actinobacteria	Actinobacteria	Bifidobacteriales	Bifidobacteriaceae	Bifidobacterium
GGQAGDXEVAAXNDXTTPATXAYXXK	COG0057 Glyceraldehyde-3-phosphate dehydrogenase/erythrose-4-phosphate dehydrogenase	G	Bacteria	Actinobacteria	Actinobacteria	Bifidobacteriales	Bifidobacteriaceae	Bifidobacterium
XGANAXXGVSXAAXYASAESADQPXYR	COG0148 Enolase	G	Bacteria	Actinobacteria	Actinobacteria	Bifidobacteriales	Bifidobacteriaceae	Bifidobacterium	Bifidobacterium adolescentis
FAEXFETVFDEXCDXK	COG3957 Phosphoketolase	G	Bacteria	Actinobacteria	Actinobacteria	Bifidobacteriales	Bifidobacteriaceae	Bifidobacterium
GASGSVXNAXAAVMPEXWGGSADXGGSNK	COG0021 Transketolase	G	Bacteria	Actinobacteria	Actinobacteria	Bifidobacteriales	Bifidobacteriaceae	Bifidobacterium
FAEXFETVFDEXCDXK	COG3957 Phosphoketolase	G	Bacteria	Actinobacteria	Actinobacteria	Bifidobacteriales	Bifidobacteriaceae	Bifidobacterium
SHHEVAGAGQQEXNYR	COG0174 Glutamine synthetase	E	Bacteria	Actinobacteria	Actinobacteria	Bifidobacteriales	Bifidobacteriaceae	Bifidobacterium
KVVVGHYTDPEVAEK	COG2160 L-arabinose isomerase	G	Bacteria	Actinobacteria	Actinobacteria	Bifidobacteriales	Bifidobacteriaceae	Bifidobacterium
XQAAYDVTNK	COG3957 Phosphoketolase	G	Bacteria	Actinobacteria	Actinobacteria	Bifidobacteriales	Bifidobacteriaceae	Bifidobacterium
XQAAYDVTNK	COG3957 Phosphoketolase	G	Bacteria	Actinobacteria	Actinobacteria	Bifidobacteriales	Bifidobacteriaceae	Bifidobacterium
XQAAYDVTNK	COG3957 Phosphoketolase	G	Bacteria	Actinobacteria	Actinobacteria	Bifidobacteriales	Bifidobacteriaceae	Bifidobacterium
VQRPXWASTGTK	COG0176 Transaldolase	G	Bacteria	Actinobacteria	Actinobacteria	Bifidobacteriales	Bifidobacteriaceae	Bifidobacterium
MHEDKVXENXQAER	COG2115 Xylose isomerase	G	Bacteria	Actinobacteria	Actinobacteria	Bifidobacteriales	Bifidobacteriaceae	Bifidobacterium
YSDPEDEAXAK	COG2115 Xylose isomerase	G	Bacteria	Actinobacteria	Actinobacteria	Bifidobacteriales	Bifidobacteriaceae	Bifidobacterium	Bifidobacterium adolescentis
XADAGXVAVGHR	COG0282 Acetate kinase	C	Bacteria	Actinobacteria	Actinobacteria	Bifidobacteriales	Bifidobacteriaceae	Bifidobacterium	Bifidobacterium adolescentis
ATEDSXXVDGK	COG0057 Glyceraldehyde-3-phosphate dehydrogenase/erythrose-4-phosphate dehydrogenase	G	Bacteria	Actinobacteria	Actinobacteria	Bifidobacteriales	Bifidobacteriaceae	Bifidobacterium
XRDEYSGVXTGK	COG0334 Glutamate dehydrogenase/leucine dehydrogenase	E	Bacteria	Actinobacteria	Actinobacteria	Bifidobacteriales	Bifidobacteriaceae	Bifidobacterium
XRDEYSGVXTGK	COG0334 Glutamate dehydrogenase/leucine dehydrogenase	E	Bacteria	Actinobacteria	Actinobacteria	Bifidobacteriales	Bifidobacteriaceae	Bifidobacterium
MHEDKVXENXQAER	COG2115 Xylose isomerase	G	Bacteria	Actinobacteria	Actinobacteria	Bifidobacteriales	Bifidobacteriaceae	Bifidobacterium
MHEDKVXENXQAER	COG2115 Xylose isomerase	G	Bacteria	Actinobacteria	Actinobacteria	Bifidobacteriales	Bifidobacteriaceae	Bifidobacterium
AXHEVGPYDPQXK	COG0176 Transaldolase	G	Bacteria	Actinobacteria	Actinobacteria	Bifidobacteriales	Bifidobacteriaceae	Bifidobacterium
KQGXNTGXGDEGGFAPK	COG0148 Enolase	G	Bacteria	Actinobacteria	Actinobacteria	Bifidobacteriales	Bifidobacteriaceae	Bifidobacterium	Bifidobacterium adolescentis
XGAANSXXVK	COG0148 Enolase	G	Bacteria	Actinobacteria	Actinobacteria	Bifidobacteriales	Bifidobacteriaceae	Bifidobacterium	Bifidobacterium adolescentis
EKGPQEGXAFHYYDADK	COG2115 Xylose isomerase	G	Bacteria	Actinobacteria	Actinobacteria	Bifidobacteriales	Bifidobacteriaceae	Bifidobacterium
EAGVXGSXDANQGDK	COG2115 Xylose isomerase	G	Bacteria	Actinobacteria	Actinobacteria	Bifidobacteriales	Bifidobacteriaceae	Bifidobacterium
HSSSVXAFTNPSXNSYHR	COG0174 Glutamine synthetase	E	Bacteria	Actinobacteria	Actinobacteria	Bifidobacteriales	Bifidobacteriaceae	Bifidobacterium
HDDGTPVEVTSTDDSXVVDGK	COG0057 Glyceraldehyde-3-phosphate dehydrogenase/erythrose-4-phosphate dehydrogenase	G	Bacteria	Actinobacteria	Actinobacteria	Bifidobacteriales	Bifidobacteriaceae	Bifidobacterium	Bifidobacterium adolescentis
EXAEATDFVDGR	COG0176 Transaldolase	G	Bacteria	Actinobacteria	Actinobacteria	Bifidobacteriales	Bifidobacteriaceae	Bifidobacterium
QGXNTGXGDEGGFAPK	COG0148 Enolase	G	Bacteria	Actinobacteria	Actinobacteria	Bifidobacteriales	Bifidobacteriaceae	Bifidobacterium	Bifidobacterium adolescentis
RTSFAAEDXFR	COG2115 Xylose isomerase	G	Bacteria	Actinobacteria	Actinobacteria	Bifidobacteriales	Bifidobacteriaceae	Bifidobacterium
RTSFTAEDXFR	COG2115 Xylose isomerase	G	Bacteria	Actinobacteria	Actinobacteria	Bifidobacteriales	Bifidobacteriaceae	Bifidobacterium	Bifidobacterium adolescentis
EVTADEXNAAFK	COG0057 Glyceraldehyde-3-phosphate dehydrogenase/erythrose-4-phosphate dehydrogenase	G	Bacteria	Actinobacteria	Actinobacteria	Bifidobacteriales	Bifidobacteriaceae	Bifidobacterium
AXPQXEVARPADAYETAEAYR	COG0021 Transketolase	G	Bacteria	Actinobacteria	Actinobacteria	Bifidobacteriales	Bifidobacteriaceae	Bifidobacterium	Bifidobacterium adolescentis
XAGVEXAVXDENTNAR	COG2160 L-arabinose isomerase	G	Bacteria	Actinobacteria	Actinobacteria	Bifidobacteriales	Bifidobacteriaceae	Bifidobacterium	Bifidobacterium adolescentis
TSFAAEDXFR	COG2115 Xylose isomerase	G	Bacteria	Actinobacteria	Actinobacteria	Bifidobacteriales	Bifidobacteriaceae	Bifidobacterium
VADXFSDAQTTSVDTXK	COG1653 ABC-type sugar transport system, periplasmic component	G	Bacteria	Actinobacteria	Actinobacteria	Bifidobacteriales	Bifidobacteriaceae	Bifidobacterium	Bifidobacterium longum
AXDDXEATFEVGK	COG0021 Transketolase	G	Bacteria	Actinobacteria	Actinobacteria	Bifidobacteriales	Bifidobacteriaceae	Bifidobacterium
XGNXTVXFDANR	COG0021 Transketolase	G	Bacteria	Actinobacteria	Actinobacteria	Bifidobacteriales	Bifidobacteriaceae	Bifidobacterium
AXDDXEATFEVGK	COG0021 Transketolase	G	Bacteria	Actinobacteria	Actinobacteria	Bifidobacteriales	Bifidobacteriaceae	Bifidobacterium
ATADFYQQXXDAK	COG1653 ABC-type sugar transport system, periplasmic component	G	Bacteria	Actinobacteria	Actinobacteria	Bifidobacteriales	Bifidobacteriaceae	Bifidobacterium	Bifidobacterium longum
SHXAGMDSFAAGXXVAAK	COG2115 Xylose isomerase	G	Bacteria	Actinobacteria	Actinobacteria	Bifidobacteriales	Bifidobacteriaceae	Bifidobacterium
FEVSXASXDPTXK	COG0137 Argininosuccinate synthase	E	Bacteria	Actinobacteria	Actinobacteria	Bifidobacteriales	Bifidobacteriaceae	Bifidobacterium
VDYAFEFFQK	COG2115 Xylose isomerase	G	Bacteria	Actinobacteria	Actinobacteria	Bifidobacteriales	Bifidobacteriaceae	Bifidobacterium
GXWDXDKXPYVGR	COG2115 Xylose isomerase	G	Bacteria	Actinobacteria	Actinobacteria	Bifidobacteriales	Bifidobacteriaceae	Bifidobacterium
GXWDXDKXPYVGR	COG2115 Xylose isomerase	G	Bacteria	Actinobacteria	Actinobacteria	Bifidobacteriales	Bifidobacteriaceae	Bifidobacterium
TYDXMDVFK	COG2115 Xylose isomerase	G	Bacteria	Actinobacteria	Actinobacteria	Bifidobacteriales	Bifidobacteriaceae	Bifidobacterium	Bifidobacterium adolescentis
YQXVDXETGEGXASGXVEK	COG0282 Acetate kinase	C	Bacteria	Actinobacteria	Actinobacteria	Bifidobacteriales	Bifidobacteriaceae	Bifidobacterium
VXGFFDEFGPK	COG0282 Acetate kinase	C	Bacteria	Actinobacteria	Actinobacteria	Bifidobacteriales	Bifidobacteriaceae	Bifidobacterium
TXDVAFSXVDPXTDEPYSRDPR	COG0174 Glutamine synthetase	E	Bacteria	Actinobacteria	Actinobacteria	Bifidobacteriales	Bifidobacteriaceae	Bifidobacterium
EPTXHQYDFDAATAXEFXR	COG2115 Xylose isomerase	G	Bacteria	Actinobacteria	Actinobacteria	Bifidobacteriales	Bifidobacteriaceae	Bifidobacterium
SNKDSXNYXMDAXSAAGYEPGK	COG0148 Enolase	G	Bacteria	Actinobacteria	Actinobacteria	Bifidobacteriales	Bifidobacteriaceae	Bifidobacterium
EXWFGVGSQDXYGEEAXR	COG2160 L-arabinose isomerase	G	Bacteria	Actinobacteria	Actinobacteria	Bifidobacteriales	Bifidobacteriaceae	Bifidobacterium
SGEAPDXAQVGYAEXPEVFTK	COG1653 ABC-type sugar transport system, periplasmic component	G	Bacteria	Actinobacteria	Actinobacteria	Bifidobacteriales	Bifidobacteriaceae	Bifidobacterium	Bifidobacterium longum
XGXTEXPQTADEFXAAAK	COG1653 ABC-type sugar transport system, periplasmic component	G	Bacteria	Actinobacteria	Actinobacteria	Bifidobacteriales	Bifidobacteriaceae	Bifidobacterium	Bifidobacterium longum
FVSGASTSPFADXYAYAGGQXK	COG2115 Xylose isomerase	G	Bacteria	Actinobacteria	Actinobacteria	Bifidobacteriales	Bifidobacteriaceae	Bifidobacterium
FVSGASTSPFADXYAYAGGQXK	COG2115 Xylose isomerase	G	Bacteria	Actinobacteria	Actinobacteria	Bifidobacteriales	Bifidobacteriaceae	Bifidobacterium
SWDTVXADVQAGXDR	COG0176 Transaldolase	G	Bacteria	Actinobacteria	Actinobacteria	Bifidobacteriales	Bifidobacteriaceae	Bifidobacterium
SXMEEXVANSXAAAK	COG0334 Glutamate dehydrogenase/leucine dehydrogenase	E	Bacteria	Actinobacteria	Actinobacteria	Bifidobacteriales	Bifidobacteriaceae	Bifidobacterium
AKEPTMFQYDFDAATAXNFXR	COG2115 Xylose isomerase	G	Bacteria	Actinobacteria	Actinobacteria	Bifidobacteriales	Bifidobacteriaceae	Bifidobacterium	Bifidobacterium adolescentis
XNQXGTVTETXDAXEXATK	COG0148 Enolase	G	Bacteria	Actinobacteria	Actinobacteria	Bifidobacteriales	Bifidobacteriaceae	Bifidobacterium
XNQXGTVTETXDAXEXATK	COG0148 Enolase	G	Bacteria	Actinobacteria	Actinobacteria	Bifidobacteriales	Bifidobacteriaceae	Bifidobacterium
DSXNYXMDAXSAAGYEPGK	COG0148 Enolase	G	Bacteria	Actinobacteria	Actinobacteria	Bifidobacteriales	Bifidobacteriaceae	Bifidobacterium
XADAVYDMVVEXAEGK	COG4213 ABC-type xylose transport system, periplasmic component	G	Bacteria	Actinobacteria	Actinobacteria	Bifidobacteriales	Bifidobacteriaceae	Bifidobacterium
GGQAGDXEVAAXNDXTTPATXAYXXK	COG0057 Glyceraldehyde-3-phosphate dehydrogenase/erythrose-4-phosphate dehydrogenase	G	Bacteria	Actinobacteria	Actinobacteria	Bifidobacteriales	Bifidobacteriaceae	Bifidobacterium
GGQAGDXEVAAXNDXTTPATXAYXXK	COG0057 Glyceraldehyde-3-phosphate dehydrogenase/erythrose-4-phosphate dehydrogenase	G	Bacteria	Actinobacteria	Actinobacteria	Bifidobacteriales	Bifidobacteriaceae	Bifidobacterium
XGANAXXGVSXAAXYASAESADQPXYR	COG0148 Enolase	G	Bacteria	Actinobacteria	Actinobacteria	Bifidobacteriales	Bifidobacteriaceae	Bifidobacterium	Bifidobacterium adolescentis
GASGSVXNAXAAVMPEXWGGSADXGGSNK	COG0021 Transketolase	G	Bacteria	Actinobacteria	Actinobacteria	Bifidobacteriales	Bifidobacteriaceae	Bifidobacterium
FAEXFETVFDEXCDXK	COG3957 Phosphoketolase	G	Bacteria	Actinobacteria	Actinobacteria	Bifidobacteriales	Bifidobacteriaceae	Bifidobacterium
FAEXFETVFDEXCDXK	COG3957 Phosphoketolase	G	Bacteria	Actinobacteria	Actinobacteria	Bifidobacteriales	Bifidobacteriaceae	Bifidobacterium
AAAXNTXAHSTGAAK	COG0057 Glyceraldehyde-3-phosphate dehydrogenase/erythrose-4-phosphate dehydrogenase	G	Bacteria	Actinobacteria	Actinobacteria	Bifidobacteriales	Bifidobacteriaceae	Bifidobacterium
XQAAYDVTNK	COG3957 Phosphoketolase	G	Bacteria	Actinobacteria	Actinobacteria	Bifidobacteriales	Bifidobacteriaceae	Bifidobacterium
XQAAYDVTNK	COG3957 Phosphoketolase	G	Bacteria	Actinobacteria	Actinobacteria	Bifidobacteriales	Bifidobacteriaceae	Bifidobacterium
VQRPXWASTGTK	COG0176 Transaldolase	G	Bacteria	Actinobacteria	Actinobacteria	Bifidobacteriales	Bifidobacteriaceae	Bifidobacterium
MHEDKVXENXQAER	COG2115 Xylose isomerase	G	Bacteria	Actinobacteria	Actinobacteria	Bifidobacteriales	Bifidobacteriaceae	Bifidobacterium
YSDPEDEAXAK	COG2115 Xylose isomerase	G	Bacteria	Actinobacteria	Actinobacteria	Bifidobacteriales	Bifidobacteriaceae	Bifidobacterium	Bifidobacterium adolescentis
XADAGXVAVGHR	COG0282 Acetate kinase	C	Bacteria	Actinobacteria	Actinobacteria	Bifidobacteriales	Bifidobacteriaceae	Bifidobacterium	Bifidobacterium adolescentis
XRDEYSGVXTGK	COG0334 Glutamate dehydrogenase/leucine dehydrogenase	E	Bacteria	Actinobacteria	Actinobacteria	Bifidobacteriales	Bifidobacteriaceae	Bifidobacterium
MHEDKVXENXQAER	COG2115 Xylose isomerase	G	Bacteria	Actinobacteria	Actinobacteria	Bifidobacteriales	Bifidobacteriaceae	Bifidobacterium
AXHEVGPYDPQXK	COG0176 Transaldolase	G	Bacteria	Actinobacteria	Actinobacteria	Bifidobacteriales	Bifidobacteriaceae	Bifidobacterium
XGAANSXXVK	COG0148 Enolase	G	Bacteria	Actinobacteria	Actinobacteria	Bifidobacteriales	Bifidobacteriaceae	Bifidobacterium	Bifidobacterium adolescentis
EAGVXGSXDANQGDK	COG2115 Xylose isomerase	G	Bacteria	Actinobacteria	Actinobacteria	Bifidobacteriales	Bifidobacteriaceae	Bifidobacterium
HSSSVXAFTNPSXNSYHR	COG0174 Glutamine synthetase	E	Bacteria	Actinobacteria	Actinobacteria	Bifidobacteriales	Bifidobacteriaceae	Bifidobacterium
EXAEATDFVDGR	COG0176 Transaldolase	G	Bacteria	Actinobacteria	Actinobacteria	Bifidobacteriales	Bifidobacteriaceae	Bifidobacterium
YXSNXDPNDXAEK	COG0166 Glucose-6-phosphate isomerase	G	Bacteria	Actinobacteria	Actinobacteria	Bifidobacteriales	Bifidobacteriaceae	Bifidobacterium
QGXNTGXGDEGGFAPK	COG0148 Enolase	G	Bacteria	Actinobacteria	Actinobacteria	Bifidobacteriales	Bifidobacteriaceae	Bifidobacterium	Bifidobacterium adolescentis
RTSFAAEDXFR	COG2115 Xylose isomerase	G	Bacteria	Actinobacteria	Actinobacteria	Bifidobacteriales	Bifidobacteriaceae	Bifidobacterium
RTSFTAEDXFR	COG2115 Xylose isomerase	G	Bacteria	Actinobacteria	Actinobacteria	Bifidobacteriales	Bifidobacteriaceae	Bifidobacterium	Bifidobacterium adolescentis
EVTADEXNAAFK	COG0057 Glyceraldehyde-3-phosphate dehydrogenase/erythrose-4-phosphate dehydrogenase	G	Bacteria	Actinobacteria	Actinobacteria	Bifidobacteriales	Bifidobacteriaceae	Bifidobacterium
XAYEXFENK	COG0176 Transaldolase	G	Bacteria	Actinobacteria	Actinobacteria	Bifidobacteriales	Bifidobacteriaceae	Bifidobacterium
DGDQPEFXQAVR	COG0334 Glutamate dehydrogenase/leucine dehydrogenase	E	Bacteria	Actinobacteria	Actinobacteria	Bifidobacteriales	Bifidobacteriaceae	Bifidobacterium
XSWTFEEVDNKXK	COG0334 Glutamate dehydrogenase/leucine dehydrogenase	E	Bacteria	Actinobacteria	Actinobacteria	Bifidobacteriales	Bifidobacteriaceae	Bifidobacterium
TSFAAEDXFR	COG2115 Xylose isomerase	G	Bacteria	Actinobacteria	Actinobacteria	Bifidobacteriales	Bifidobacteriaceae	Bifidobacterium
AXDXGAANSXXVK	COG0148 Enolase	G	Bacteria	Actinobacteria	Actinobacteria	Bifidobacteriales	Bifidobacteriaceae	Bifidobacterium
XGNXTVXFDANR	COG0021 Transketolase	G	Bacteria	Actinobacteria	Actinobacteria	Bifidobacteriales	Bifidobacteriaceae	Bifidobacterium
XQVPDGSVTEXTTVXNK	COG0057 Glyceraldehyde-3-phosphate dehydrogenase/erythrose-4-phosphate dehydrogenase	G	Bacteria	Actinobacteria	Actinobacteria	Bifidobacteriales	Bifidobacteriaceae	Bifidobacterium
VDYAFEFFQK	COG2115 Xylose isomerase	G	Bacteria	Actinobacteria	Actinobacteria	Bifidobacteriales	Bifidobacteriaceae	Bifidobacterium
XQVPDGSVTEXTTVXNK	COG0057 Glyceraldehyde-3-phosphate dehydrogenase/erythrose-4-phosphate dehydrogenase	G	Bacteria	Actinobacteria	Actinobacteria	Bifidobacteriales	Bifidobacteriaceae	Bifidobacterium
GXWDXDKXPYVGR	COG2115 Xylose isomerase	G	Bacteria	Actinobacteria	Actinobacteria	Bifidobacteriales	Bifidobacteriaceae	Bifidobacterium
TYDXMDVFK	COG2115 Xylose isomerase	G	Bacteria	Actinobacteria	Actinobacteria	Bifidobacteriales	Bifidobacteriaceae	Bifidobacterium	Bifidobacterium adolescentis
NXXKPETXQXFANXAK	COG0166 Glucose-6-phosphate isomerase	G	Bacteria	Actinobacteria	Actinobacteria	Bifidobacteriales	Bifidobacteriaceae	Bifidobacterium
YQXVDXETGEGXASGXVEK	COG0282 Acetate kinase	C	Bacteria	Actinobacteria	Actinobacteria	Bifidobacteriales	Bifidobacteriaceae	Bifidobacterium
VXGFFDEFGPK	COG0282 Acetate kinase	C	Bacteria	Actinobacteria	Actinobacteria	Bifidobacteriales	Bifidobacteriaceae	Bifidobacterium
TXDVAFSXVDPXTDEPYSRDPR	COG0174 Glutamine synthetase	E	Bacteria	Actinobacteria	Actinobacteria	Bifidobacteriales	Bifidobacteriaceae	Bifidobacterium
VXGFFEEYGPNXSEAGXVAVGHR	COG0282 Acetate kinase	C	Bacteria	Actinobacteria	Actinobacteria	Bifidobacteriales	Bifidobacteriaceae	Bifidobacterium
SGEAPDXAQVGYAEXPEVFTK	COG1653 ABC-type sugar transport system, periplasmic component	G	Bacteria	Actinobacteria	Actinobacteria	Bifidobacteriales	Bifidobacteriaceae	Bifidobacterium	Bifidobacterium longum
FVSGASTSPFADXYAYAGGQXK	COG2115 Xylose isomerase	G	Bacteria	Actinobacteria	Actinobacteria	Bifidobacteriales	Bifidobacteriaceae	Bifidobacterium
FVSGASTSPFADXYAYAGGQXK	COG2115 Xylose isomerase	G	Bacteria	Actinobacteria	Actinobacteria	Bifidobacteriales	Bifidobacteriaceae	Bifidobacterium
SWDTVXADVQAGXDR	COG0176 Transaldolase	G	Bacteria	Actinobacteria	Actinobacteria	Bifidobacteriales	Bifidobacteriaceae	Bifidobacterium
SWDTVXADVQAGXDR	COG0176 Transaldolase	G	Bacteria	Actinobacteria	Actinobacteria	Bifidobacteriales	Bifidobacteriaceae	Bifidobacterium
FVNDEVDAXXXSSTEDSGWDDSXKK	COG1879 ABC-type sugar transport system, periplasmic component	G	Bacteria	Actinobacteria	Actinobacteria	Bifidobacteriales	Bifidobacteriaceae	Bifidobacterium
AKEPTMFQYDFDAATAXNFXR	COG2115 Xylose isomerase	G	Bacteria	Actinobacteria	Actinobacteria	Bifidobacteriales	Bifidobacteriaceae	Bifidobacterium	Bifidobacterium adolescentis
GAWDXXQPYFEK	COG4213 ABC-type xylose transport system, periplasmic component	G	Bacteria	Actinobacteria	Actinobacteria	Bifidobacteriales	Bifidobacteriaceae	Bifidobacterium
GXDPETTXFXXVSK	COG0166 Glucose-6-phosphate isomerase	G	Bacteria	Actinobacteria	Actinobacteria	Bifidobacteriales	Bifidobacteriaceae	Bifidobacterium
GXDPETTXFXXVSK	COG0166 Glucose-6-phosphate isomerase	G	Bacteria	Actinobacteria	Actinobacteria	Bifidobacteriales	Bifidobacteriaceae	Bifidobacterium
XNQXGTVTETXDAXEXATK	COG0148 Enolase	G	Bacteria	Actinobacteria	Actinobacteria	Bifidobacteriales	Bifidobacteriaceae	Bifidobacterium
XNQXGTVTETXDAXEXATK	COG0148 Enolase	G	Bacteria	Actinobacteria	Actinobacteria	Bifidobacteriales	Bifidobacteriaceae	Bifidobacterium
VQVPDGSVTEXTTVXNTETTADEXNAAFK	COG0057 Glyceraldehyde-3-phosphate dehydrogenase/erythrose-4-phosphate dehydrogenase	G	Bacteria	Actinobacteria	Actinobacteria	Bifidobacteriales	Bifidobacteriaceae	Bifidobacterium
GGQAGDXEVAAXNDXTTPATXAYXXK	COG0057 Glyceraldehyde-3-phosphate dehydrogenase/erythrose-4-phosphate dehydrogenase	G	Bacteria	Actinobacteria	Actinobacteria	Bifidobacteriales	Bifidobacteriaceae	Bifidobacterium
XGANAXXGVSXAAXYASAESADQPXYR	COG0148 Enolase	G	Bacteria	Actinobacteria	Actinobacteria	Bifidobacteriales	Bifidobacteriaceae	Bifidobacterium	Bifidobacterium adolescentis
FAEXFETVFDEXCDXK	COG3957 Phosphoketolase	G	Bacteria	Actinobacteria	Actinobacteria	Bifidobacteriales	Bifidobacteriaceae	Bifidobacterium
FAEXFETVFDEXCDXK	COG3957 Phosphoketolase	G	Bacteria	Actinobacteria	Actinobacteria	Bifidobacteriales	Bifidobacteriaceae	Bifidobacterium
SHHEVAGAGQQEXNYR	COG0174 Glutamine synthetase	E	Bacteria	Actinobacteria	Actinobacteria	Bifidobacteriales	Bifidobacteriaceae	Bifidobacterium
KVVVGHYTDPEVAEK	COG2160 L-arabinose isomerase	G	Bacteria	Actinobacteria	Actinobacteria	Bifidobacteriales	Bifidobacteriaceae	Bifidobacterium
XQAAYDVTNK	COG3957 Phosphoketolase	G	Bacteria	Actinobacteria	Actinobacteria	Bifidobacteriales	Bifidobacteriaceae	Bifidobacterium
VQRPXWASTGTK	COG0176 Transaldolase	G	Bacteria	Actinobacteria	Actinobacteria	Bifidobacteriales	Bifidobacteriaceae	Bifidobacterium
YSDPEDEAXAK	COG2115 Xylose isomerase	G	Bacteria	Actinobacteria	Actinobacteria	Bifidobacteriales	Bifidobacteriaceae	Bifidobacterium	Bifidobacterium adolescentis
ATEDSXXVDGK	COG0057 Glyceraldehyde-3-phosphate dehydrogenase/erythrose-4-phosphate dehydrogenase	G	Bacteria	Actinobacteria	Actinobacteria	Bifidobacteriales	Bifidobacteriaceae	Bifidobacterium
XRDEYSGVXTGK	COG0334 Glutamate dehydrogenase/leucine dehydrogenase	E	Bacteria	Actinobacteria	Actinobacteria	Bifidobacteriales	Bifidobacteriaceae	Bifidobacterium
XRDEYSGVXTGK	COG0334 Glutamate dehydrogenase/leucine dehydrogenase	E	Bacteria	Actinobacteria	Actinobacteria	Bifidobacteriales	Bifidobacteriaceae	Bifidobacterium
MHEDKVXENXQAER	COG2115 Xylose isomerase	G	Bacteria	Actinobacteria	Actinobacteria	Bifidobacteriales	Bifidobacteriaceae	Bifidobacterium
MHEDKVXENXQAER	COG2115 Xylose isomerase	G	Bacteria	Actinobacteria	Actinobacteria	Bifidobacteriales	Bifidobacteriaceae	Bifidobacterium
TGPDGGSAVAVXK	COG1653 ABC-type sugar transport system, periplasmic component	G	Bacteria	Actinobacteria	Actinobacteria	Bifidobacteriales	Bifidobacteriaceae	Bifidobacterium	Bifidobacterium longum
XGAANSXXVK	COG0148 Enolase	G	Bacteria	Actinobacteria	Actinobacteria	Bifidobacteriales	Bifidobacteriaceae	Bifidobacterium	Bifidobacterium adolescentis
EKGPQEGXAFHYYDADK	COG2115 Xylose isomerase	G	Bacteria	Actinobacteria	Actinobacteria	Bifidobacteriales	Bifidobacteriaceae	Bifidobacterium
EAGVXGSXDANQGDK	COG2115 Xylose isomerase	G	Bacteria	Actinobacteria	Actinobacteria	Bifidobacteriales	Bifidobacteriaceae	Bifidobacterium
HSSSVXAFTNPSXNSYHR	COG0174 Glutamine synthetase	E	Bacteria	Actinobacteria	Actinobacteria	Bifidobacteriales	Bifidobacteriaceae	Bifidobacterium
GPQEGXAFHYYDADK	COG2115 Xylose isomerase	G	Bacteria	Actinobacteria	Actinobacteria	Bifidobacteriales	Bifidobacteriaceae	Bifidobacterium
DAVVVSMSDVR	COG2160 L-arabinose isomerase	G	Bacteria	Actinobacteria	Actinobacteria	Bifidobacteriales	Bifidobacteriaceae	Bifidobacterium
RTSFAAEDXFR	COG2115 Xylose isomerase	G	Bacteria	Actinobacteria	Actinobacteria	Bifidobacteriales	Bifidobacteriaceae	Bifidobacterium
RTSFTAEDXFR	COG2115 Xylose isomerase	G	Bacteria	Actinobacteria	Actinobacteria	Bifidobacteriales	Bifidobacteriaceae	Bifidobacterium	Bifidobacterium adolescentis
EVTADEXNAAFK	COG0057 Glyceraldehyde-3-phosphate dehydrogenase/erythrose-4-phosphate dehydrogenase	G	Bacteria	Actinobacteria	Actinobacteria	Bifidobacteriales	Bifidobacteriaceae	Bifidobacterium
XXDENWGXK	COG0057 Glyceraldehyde-3-phosphate dehydrogenase/erythrose-4-phosphate dehydrogenase	G	Bacteria	Actinobacteria	Actinobacteria	Bifidobacteriales	Bifidobacteriaceae	Bifidobacterium
DGDQPEFXQAVR	COG0334 Glutamate dehydrogenase/leucine dehydrogenase	E	Bacteria	Actinobacteria	Actinobacteria	Bifidobacteriales	Bifidobacteriaceae	Bifidobacterium
AXPQXEVARPADAYETAEAYR	COG0021 Transketolase	G	Bacteria	Actinobacteria	Actinobacteria	Bifidobacteriales	Bifidobacteriaceae	Bifidobacterium	Bifidobacterium adolescentis
XAGVEXAVXDENTNAR	COG2160 L-arabinose isomerase	G	Bacteria	Actinobacteria	Actinobacteria	Bifidobacteriales	Bifidobacteriaceae	Bifidobacterium	Bifidobacterium adolescentis
TSFAAEDXFR	COG2115 Xylose isomerase	G	Bacteria	Actinobacteria	Actinobacteria	Bifidobacteriales	Bifidobacteriaceae	Bifidobacterium
AXDDXEATFEVGK	COG0021 Transketolase	G	Bacteria	Actinobacteria	Actinobacteria	Bifidobacteriales	Bifidobacteriaceae	Bifidobacterium
XGNXTVXFDANR	COG0021 Transketolase	G	Bacteria	Actinobacteria	Actinobacteria	Bifidobacteriales	Bifidobacteriaceae	Bifidobacterium
AXDDXEATFEVGK	COG0021 Transketolase	G	Bacteria	Actinobacteria	Actinobacteria	Bifidobacteriales	Bifidobacteriaceae	Bifidobacterium
SHXAGMDSFAAGXXVAAK	COG2115 Xylose isomerase	G	Bacteria	Actinobacteria	Actinobacteria	Bifidobacteriales	Bifidobacteriaceae	Bifidobacterium
FEVSXASXDPTXK	COG0137 Argininosuccinate synthase	E	Bacteria	Actinobacteria	Actinobacteria	Bifidobacteriales	Bifidobacteriaceae	Bifidobacterium
VDYAFEFFQK	COG2115 Xylose isomerase	G	Bacteria	Actinobacteria	Actinobacteria	Bifidobacteriales	Bifidobacteriaceae	Bifidobacterium
GXWDXDKXPYVGR	COG2115 Xylose isomerase	G	Bacteria	Actinobacteria	Actinobacteria	Bifidobacteriales	Bifidobacteriaceae	Bifidobacterium
AXPQXEVXRPADAFETAEAYR	COG0021 Transketolase	G	Bacteria	Actinobacteria	Actinobacteria	Bifidobacteriales	Bifidobacteriaceae	Bifidobacterium
XPDSEGMTXVNDXVAK	COG1653 ABC-type sugar transport system, periplasmic component	G	Bacteria	Actinobacteria	Actinobacteria	Bifidobacteriales	Bifidobacteriaceae	Bifidobacterium
TYDXMDVFK	COG2115 Xylose isomerase	G	Bacteria	Actinobacteria	Actinobacteria	Bifidobacteriales	Bifidobacteriaceae	Bifidobacterium	Bifidobacterium adolescentis
XXMDVVDVVEPQGSXK	COG2160 L-arabinose isomerase	G	Bacteria	Actinobacteria	Actinobacteria	Bifidobacteriales	Bifidobacteriaceae	Bifidobacterium
YQXVDXETGEGXASGXVEK	COG0282 Acetate kinase	C	Bacteria	Actinobacteria	Actinobacteria	Bifidobacteriales	Bifidobacteriaceae	Bifidobacterium
AYGXPQDTGPXVYFYNK	COG1653 ABC-type sugar transport system, periplasmic component	G	Bacteria	Actinobacteria	Actinobacteria	Bifidobacteriales	Bifidobacteriaceae	Bifidobacterium	Bifidobacterium longum
VXGFFDEFGPK	COG0282 Acetate kinase	C	Bacteria	Actinobacteria	Actinobacteria	Bifidobacteriales	Bifidobacteriaceae	Bifidobacterium
YDVDPAXXDAKYDSXFXAAK	COG2160 L-arabinose isomerase	G	Bacteria	Actinobacteria	Actinobacteria	Bifidobacteriales	Bifidobacteriaceae	Bifidobacterium
EPTXHQYDFDAATAXEFXR	COG2115 Xylose isomerase	G	Bacteria	Actinobacteria	Actinobacteria	Bifidobacteriales	Bifidobacteriaceae	Bifidobacterium
EXWFGVGSQDXYGEEAXR	COG2160 L-arabinose isomerase	G	Bacteria	Actinobacteria	Actinobacteria	Bifidobacteriales	Bifidobacteriaceae	Bifidobacterium
SGEAPDXAQVGYAEXPEVFTK	COG1653 ABC-type sugar transport system, periplasmic component	G	Bacteria	Actinobacteria	Actinobacteria	Bifidobacteriales	Bifidobacteriaceae	Bifidobacterium	Bifidobacterium longum
XGXTEXPQTADEFXAAAK	COG1653 ABC-type sugar transport system, periplasmic component	G	Bacteria	Actinobacteria	Actinobacteria	Bifidobacteriales	Bifidobacteriaceae	Bifidobacterium	Bifidobacterium longum
FVSGASTSPFADXYAYAGGQXK	COG2115 Xylose isomerase	G	Bacteria	Actinobacteria	Actinobacteria	Bifidobacteriales	Bifidobacteriaceae	Bifidobacterium
FVSGASTSPFADXYAYAGGQXK	COG2115 Xylose isomerase	G	Bacteria	Actinobacteria	Actinobacteria	Bifidobacteriales	Bifidobacteriaceae	Bifidobacterium
SXMEEXVANSXAAAK	COG0334 Glutamate dehydrogenase/leucine dehydrogenase	E	Bacteria	Actinobacteria	Actinobacteria	Bifidobacteriales	Bifidobacteriaceae	Bifidobacterium
GAWDXXQPYFEK	COG4213 ABC-type xylose transport system, periplasmic component	G	Bacteria	Actinobacteria	Actinobacteria	Bifidobacteriales	Bifidobacteriaceae	Bifidobacterium
AVAQAXVDATAAGAFTXVGGGDSASAVR	COG0126 3-phosphoglycerate kinase	G	Bacteria	Actinobacteria	Actinobacteria	Bifidobacteriales	Bifidobacteriaceae	Bifidobacterium	Bifidobacterium adolescentis
XNQXGTVTETXDAXEXATK	COG0148 Enolase	G	Bacteria	Actinobacteria	Actinobacteria	Bifidobacteriales	Bifidobacteriaceae	Bifidobacterium
XNQXGTVTETXDAXEXATK	COG0148 Enolase	G	Bacteria	Actinobacteria	Actinobacteria	Bifidobacteriales	Bifidobacteriaceae	Bifidobacterium
DSXNYXMDAXSAAGYEPGK	COG0148 Enolase	G	Bacteria	Actinobacteria	Actinobacteria	Bifidobacteriales	Bifidobacteriaceae	Bifidobacterium
GGQAGDXEVAAXNDXTTPATXAYXXK	COG0057 Glyceraldehyde-3-phosphate dehydrogenase/erythrose-4-phosphate dehydrogenase	G	Bacteria	Actinobacteria	Actinobacteria	Bifidobacteriales	Bifidobacteriaceae	Bifidobacterium
XGANAXXGVSXAAXYASAESADQPXYR	COG0148 Enolase	G	Bacteria	Actinobacteria	Actinobacteria	Bifidobacteriales	Bifidobacteriaceae	Bifidobacterium	Bifidobacterium adolescentis
FAEXFETVFDEXCDXK	COG3957 Phosphoketolase	G	Bacteria	Actinobacteria	Actinobacteria	Bifidobacteriales	Bifidobacteriaceae	Bifidobacterium
FAEXFETVFDEXCDXK	COG3957 Phosphoketolase	G	Bacteria	Actinobacteria	Actinobacteria	Bifidobacteriales	Bifidobacteriaceae	Bifidobacterium
GASGSVXNAXAAVMPEXWGGSADXGGSNK	COG0021 Transketolase	G	Bacteria	Actinobacteria	Actinobacteria	Bifidobacteriales	Bifidobacteriaceae	Bifidobacterium
SHHEVAGAGQQEXNYR	COG0174 Glutamine synthetase	E	Bacteria	Actinobacteria	Actinobacteria	Bifidobacteriales	Bifidobacteriaceae	Bifidobacterium
KVVVGHYTDPEVAEK	COG2160 L-arabinose isomerase	G	Bacteria	Actinobacteria	Actinobacteria	Bifidobacteriales	Bifidobacteriaceae	Bifidobacterium
XQAAYDVTNK	COG3957 Phosphoketolase	G	Bacteria	Actinobacteria	Actinobacteria	Bifidobacteriales	Bifidobacteriaceae	Bifidobacterium
TEFKETEXDER	COG0021 Transketolase	G	Bacteria	Actinobacteria	Actinobacteria	Bifidobacteriales	Bifidobacteriaceae	Bifidobacterium
XQAAYDVTNK	COG3957 Phosphoketolase	G	Bacteria	Actinobacteria	Actinobacteria	Bifidobacteriales	Bifidobacteriaceae	Bifidobacterium
MHEDKVXENXQAER	COG2115 Xylose isomerase	G	Bacteria	Actinobacteria	Actinobacteria	Bifidobacteriales	Bifidobacteriaceae	Bifidobacterium
YSDPEDEAXAK	COG2115 Xylose isomerase	G	Bacteria	Actinobacteria	Actinobacteria	Bifidobacteriales	Bifidobacteriaceae	Bifidobacterium	Bifidobacterium adolescentis
XRDEYSGVXTGK	COG0334 Glutamate dehydrogenase/leucine dehydrogenase	E	Bacteria	Actinobacteria	Actinobacteria	Bifidobacteriales	Bifidobacteriaceae	Bifidobacterium
XRDEYSGVXTGK	COG0334 Glutamate dehydrogenase/leucine dehydrogenase	E	Bacteria	Actinobacteria	Actinobacteria	Bifidobacteriales	Bifidobacteriaceae	Bifidobacterium
MHEDKVXENXQAER	COG2115 Xylose isomerase	G	Bacteria	Actinobacteria	Actinobacteria	Bifidobacteriales	Bifidobacteriaceae	Bifidobacterium
MHEDKVXENXQAER	COG2115 Xylose isomerase	G	Bacteria	Actinobacteria	Actinobacteria	Bifidobacteriales	Bifidobacteriaceae	Bifidobacterium
TGPDGGSAVAVXK	COG1653 ABC-type sugar transport system, periplasmic component	G	Bacteria	Actinobacteria	Actinobacteria	Bifidobacteriales	Bifidobacteriaceae	Bifidobacterium	Bifidobacterium longum
AXHEVGPYDPQXK	COG0176 Transaldolase	G	Bacteria	Actinobacteria	Actinobacteria	Bifidobacteriales	Bifidobacteriaceae	Bifidobacterium
XGAANSXXVK	COG0148 Enolase	G	Bacteria	Actinobacteria	Actinobacteria	Bifidobacteriales	Bifidobacteriaceae	Bifidobacterium	Bifidobacterium adolescentis
EAGVXGSXDANQGDK	COG2115 Xylose isomerase	G	Bacteria	Actinobacteria	Actinobacteria	Bifidobacteriales	Bifidobacteriaceae	Bifidobacterium
HSSSVXAFTNPSXNSYHR	COG0174 Glutamine synthetase	E	Bacteria	Actinobacteria	Actinobacteria	Bifidobacteriales	Bifidobacteriaceae	Bifidobacterium
QGXNTGXGDEGGFAPK	COG0148 Enolase	G	Bacteria	Actinobacteria	Actinobacteria	Bifidobacteriales	Bifidobacteriaceae	Bifidobacterium	Bifidobacterium adolescentis
RTSFAAEDXFR	COG2115 Xylose isomerase	G	Bacteria	Actinobacteria	Actinobacteria	Bifidobacteriales	Bifidobacteriaceae	Bifidobacterium
RTSFTAEDXFR	COG2115 Xylose isomerase	G	Bacteria	Actinobacteria	Actinobacteria	Bifidobacteriales	Bifidobacteriaceae	Bifidobacterium	Bifidobacterium adolescentis
XXDENWGXK	COG0057 Glyceraldehyde-3-phosphate dehydrogenase/erythrose-4-phosphate dehydrogenase	G	Bacteria	Actinobacteria	Actinobacteria	Bifidobacteriales	Bifidobacteriaceae	Bifidobacterium
DGDQPEFXQAVR	COG0334 Glutamate dehydrogenase/leucine dehydrogenase	E	Bacteria	Actinobacteria	Actinobacteria	Bifidobacteriales	Bifidobacteriaceae	Bifidobacterium
AXPQXEVARPADAYETAEAYR	COG0021 Transketolase	G	Bacteria	Actinobacteria	Actinobacteria	Bifidobacteriales	Bifidobacteriaceae	Bifidobacterium	Bifidobacterium adolescentis
XAGVEXAVXDENTNAR	COG2160 L-arabinose isomerase	G	Bacteria	Actinobacteria	Actinobacteria	Bifidobacteriales	Bifidobacteriaceae	Bifidobacterium	Bifidobacterium adolescentis
TSFAAEDXFR	COG2115 Xylose isomerase	G	Bacteria	Actinobacteria	Actinobacteria	Bifidobacteriales	Bifidobacteriaceae	Bifidobacterium
VADXFSDAQTTSVDTXK	COG1653 ABC-type sugar transport system, periplasmic component	G	Bacteria	Actinobacteria	Actinobacteria	Bifidobacteriales	Bifidobacteriaceae	Bifidobacterium	Bifidobacterium longum
AXDDXEATFEVGK	COG0021 Transketolase	G	Bacteria	Actinobacteria	Actinobacteria	Bifidobacteriales	Bifidobacteriaceae	Bifidobacterium
XGNXTVXFDANR	COG0021 Transketolase	G	Bacteria	Actinobacteria	Actinobacteria	Bifidobacteriales	Bifidobacteriaceae	Bifidobacterium
AXDDXEATFEVGK	COG0021 Transketolase	G	Bacteria	Actinobacteria	Actinobacteria	Bifidobacteriales	Bifidobacteriaceae	Bifidobacterium
FEVSXASXDPTXK	COG0137 Argininosuccinate synthase	E	Bacteria	Actinobacteria	Actinobacteria	Bifidobacteriales	Bifidobacteriaceae	Bifidobacterium
XQVPDGSVTEXTTVXNK	COG0057 Glyceraldehyde-3-phosphate dehydrogenase/erythrose-4-phosphate dehydrogenase	G	Bacteria	Actinobacteria	Actinobacteria	Bifidobacteriales	Bifidobacteriaceae	Bifidobacterium
VDYAFEFFQK	COG2115 Xylose isomerase	G	Bacteria	Actinobacteria	Actinobacteria	Bifidobacteriales	Bifidobacteriaceae	Bifidobacterium
GXWDXDKXPYVGR	COG2115 Xylose isomerase	G	Bacteria	Actinobacteria	Actinobacteria	Bifidobacteriales	Bifidobacteriaceae	Bifidobacterium
GXWDXDKXPYVGR	COG2115 Xylose isomerase	G	Bacteria	Actinobacteria	Actinobacteria	Bifidobacteriales	Bifidobacteriaceae	Bifidobacterium
TYDXMDVFK	COG2115 Xylose isomerase	G	Bacteria	Actinobacteria	Actinobacteria	Bifidobacteriales	Bifidobacteriaceae	Bifidobacterium	Bifidobacterium adolescentis
XXMDVVDVVEPQGSXK	COG2160 L-arabinose isomerase	G	Bacteria	Actinobacteria	Actinobacteria	Bifidobacteriales	Bifidobacteriaceae	Bifidobacterium
VXGFFDEFGPK	COG0282 Acetate kinase	C	Bacteria	Actinobacteria	Actinobacteria	Bifidobacteriales	Bifidobacteriaceae	Bifidobacterium
NXXKPETXQXFADXAK	COG0166 Glucose-6-phosphate isomerase	G	Bacteria	Actinobacteria	Actinobacteria	Bifidobacteriales	Bifidobacteriaceae	Bifidobacterium
EXWFGVGSQDXYGEEAXR	COG2160 L-arabinose isomerase	G	Bacteria	Actinobacteria	Actinobacteria	Bifidobacteriales	Bifidobacteriaceae	Bifidobacterium
VXGFFEEYGPNXSEAGXVAVGHR	COG0282 Acetate kinase	C	Bacteria	Actinobacteria	Actinobacteria	Bifidobacteriales	Bifidobacteriaceae	Bifidobacterium
SGEAPDXAQVGYAEXPEVFTK	COG1653 ABC-type sugar transport system, periplasmic component	G	Bacteria	Actinobacteria	Actinobacteria	Bifidobacteriales	Bifidobacteriaceae	Bifidobacterium	Bifidobacterium longum
FVSGASTSPFADXYAYAGGQXK	COG2115 Xylose isomerase	G	Bacteria	Actinobacteria	Actinobacteria	Bifidobacteriales	Bifidobacteriaceae	Bifidobacterium
FVSGASTSPFADXYAYAGGQXK	COG2115 Xylose isomerase	G	Bacteria	Actinobacteria	Actinobacteria	Bifidobacteriales	Bifidobacteriaceae	Bifidobacterium
SWDTVXADVQAGXDR	COG0176 Transaldolase	G	Bacteria	Actinobacteria	Actinobacteria	Bifidobacteriales	Bifidobacteriaceae	Bifidobacterium
SXMEEXVANSXAAAK	COG0334 Glutamate dehydrogenase/leucine dehydrogenase	E	Bacteria	Actinobacteria	Actinobacteria	Bifidobacteriales	Bifidobacteriaceae	Bifidobacterium
DAFTDGMPFDGSSVEGFQAXNESDMK	COG0174 Glutamine synthetase	E	Bacteria	Actinobacteria	Actinobacteria	Bifidobacteriales	Bifidobacteriaceae	Bifidobacterium
GAWDXXQPYFEK	COG4213 ABC-type xylose transport system, periplasmic component	G	Bacteria	Actinobacteria	Actinobacteria	Bifidobacteriales	Bifidobacteriaceae	Bifidobacterium
XNQXGTVTETXDAXEXATK	COG0148 Enolase	G	Bacteria	Actinobacteria	Actinobacteria	Bifidobacteriales	Bifidobacteriaceae	Bifidobacterium
XNQXGTVTETXDAXEXATK	COG0148 Enolase	G	Bacteria	Actinobacteria	Actinobacteria	Bifidobacteriales	Bifidobacteriaceae	Bifidobacterium
DSXNYXMDAXSAAGYEPGK	COG0148 Enolase	G	Bacteria	Actinobacteria	Actinobacteria	Bifidobacteriales	Bifidobacteriaceae	Bifidobacterium
GGQAGDXEVAAXNDXTTPATXAYXXK	COG0057 Glyceraldehyde-3-phosphate dehydrogenase/erythrose-4-phosphate dehydrogenase	G	Bacteria	Actinobacteria	Actinobacteria	Bifidobacteriales	Bifidobacteriaceae	Bifidobacterium
GGQAGDXEVAAXNDXTTPATXAYXXK	COG0057 Glyceraldehyde-3-phosphate dehydrogenase/erythrose-4-phosphate dehydrogenase	G	Bacteria	Actinobacteria	Actinobacteria	Bifidobacteriales	Bifidobacteriaceae	Bifidobacterium
XGANAXXGVSXAAXYASAESADQPXYR	COG0148 Enolase	G	Bacteria	Actinobacteria	Actinobacteria	Bifidobacteriales	Bifidobacteriaceae	Bifidobacterium	Bifidobacterium adolescentis
GASGSVXNAXAAVMPEXWGGSADXGGSNK	COG0021 Transketolase	G	Bacteria	Actinobacteria	Actinobacteria	Bifidobacteriales	Bifidobacteriaceae	Bifidobacterium
FAEXFETVFDEXCDXK	COG3957 Phosphoketolase	G	Bacteria	Actinobacteria	Actinobacteria	Bifidobacteriales	Bifidobacteriaceae	Bifidobacterium
FAEXFETVFDEXCDXK	COG3957 Phosphoketolase	G	Bacteria	Actinobacteria	Actinobacteria	Bifidobacteriales	Bifidobacteriaceae	Bifidobacterium
DGSKVVGVPYAMETYGXXYNK	COG1653 ABC-type sugar transport system, periplasmic component	G	Bacteria	Actinobacteria	Actinobacteria	Bifidobacteriales	Bifidobacteriaceae	Bifidobacterium	Bifidobacterium pseudocatenulatum
AAAXNTXPHSTGAAK	COG0057 Glyceraldehyde-3-phosphate dehydrogenase/erythrose-4-phosphate dehydrogenase	G	Bacteria	Actinobacteria	Actinobacteria	Bifidobacteriales	Bifidobacteriaceae	Bifidobacterium
XQAAYDVTNK	COG3957 Phosphoketolase	G	Bacteria	Actinobacteria	Actinobacteria	Bifidobacteriales	Bifidobacteriaceae	Bifidobacterium
VQRPXWASTGTK	COG0176 Transaldolase	G	Bacteria	Actinobacteria	Actinobacteria	Bifidobacteriales	Bifidobacteriaceae	Bifidobacterium
MHEDKVXENXQAER	COG2115 Xylose isomerase	G	Bacteria	Actinobacteria	Actinobacteria	Bifidobacteriales	Bifidobacteriaceae	Bifidobacterium
YSDPEDEAXAK	COG2115 Xylose isomerase	G	Bacteria	Actinobacteria	Actinobacteria	Bifidobacteriales	Bifidobacteriaceae	Bifidobacterium	Bifidobacterium adolescentis
XADAGXVAVGHR	COG0282 Acetate kinase	C	Bacteria	Actinobacteria	Actinobacteria	Bifidobacteriales	Bifidobacteriaceae	Bifidobacterium	Bifidobacterium adolescentis
XRDEYSGVXTGK	COG0334 Glutamate dehydrogenase/leucine dehydrogenase	E	Bacteria	Actinobacteria	Actinobacteria	Bifidobacteriales	Bifidobacteriaceae	Bifidobacterium
XRDEYSGVXTGK	COG0334 Glutamate dehydrogenase/leucine dehydrogenase	E	Bacteria	Actinobacteria	Actinobacteria	Bifidobacteriales	Bifidobacteriaceae	Bifidobacterium
MHEDKVXENXQAER	COG2115 Xylose isomerase	G	Bacteria	Actinobacteria	Actinobacteria	Bifidobacteriales	Bifidobacteriaceae	Bifidobacterium
MHEDKVXENXQAER	COG2115 Xylose isomerase	G	Bacteria	Actinobacteria	Actinobacteria	Bifidobacteriales	Bifidobacteriaceae	Bifidobacterium
TGPDGGSAVAVXK	COG1653 ABC-type sugar transport system, periplasmic component	G	Bacteria	Actinobacteria	Actinobacteria	Bifidobacteriales	Bifidobacteriaceae	Bifidobacterium	Bifidobacterium longum
VXESQSANWSTDEAK	COG1879 ABC-type sugar transport system, periplasmic component	G	Bacteria	Actinobacteria	Actinobacteria	Bifidobacteriales	Bifidobacteriaceae	Bifidobacterium
AXHEVGPYDPQXK	COG0176 Transaldolase	G	Bacteria	Actinobacteria	Actinobacteria	Bifidobacteriales	Bifidobacteriaceae	Bifidobacterium
HYDEXQVEGVSXKK	COG0166 Glucose-6-phosphate isomerase	G	Bacteria	Actinobacteria	Actinobacteria	Bifidobacteriales	Bifidobacteriaceae	Bifidobacterium
XGAANSXXVK	COG0148 Enolase	G	Bacteria	Actinobacteria	Actinobacteria	Bifidobacteriales	Bifidobacteriaceae	Bifidobacterium	Bifidobacterium adolescentis
EAGVXGSXDANQGDK	COG2115 Xylose isomerase	G	Bacteria	Actinobacteria	Actinobacteria	Bifidobacteriales	Bifidobacteriaceae	Bifidobacterium
HSSSVXAFTNPSXNSYHR	COG0174 Glutamine synthetase	E	Bacteria	Actinobacteria	Actinobacteria	Bifidobacteriales	Bifidobacteriaceae	Bifidobacterium
XAXDXYVHR	COG0282 Acetate kinase	C	Bacteria	Actinobacteria	Actinobacteria	Bifidobacteriales	Bifidobacteriaceae	Bifidobacterium
EXAEATDFVDGR	COG0176 Transaldolase	G	Bacteria	Actinobacteria	Actinobacteria	Bifidobacteriales	Bifidobacteriaceae	Bifidobacterium
YXSNXDPNDXAEK	COG0166 Glucose-6-phosphate isomerase	G	Bacteria	Actinobacteria	Actinobacteria	Bifidobacteriales	Bifidobacteriaceae	Bifidobacterium
RTSFAAEDXFR	COG2115 Xylose isomerase	G	Bacteria	Actinobacteria	Actinobacteria	Bifidobacteriales	Bifidobacteriaceae	Bifidobacterium
RTSFTAEDXFR	COG2115 Xylose isomerase	G	Bacteria	Actinobacteria	Actinobacteria	Bifidobacteriales	Bifidobacteriaceae	Bifidobacterium	Bifidobacterium adolescentis
EVTADEXNAAFK	COG0057 Glyceraldehyde-3-phosphate dehydrogenase/erythrose-4-phosphate dehydrogenase	G	Bacteria	Actinobacteria	Actinobacteria	Bifidobacteriales	Bifidobacteriaceae	Bifidobacterium
XAYEXFENK	COG0176 Transaldolase	G	Bacteria	Actinobacteria	Actinobacteria	Bifidobacteriales	Bifidobacteriaceae	Bifidobacterium
VVNVVDXVK	COG3957 Phosphoketolase	G	Bacteria	Actinobacteria	Actinobacteria	Bifidobacteriales	Bifidobacteriaceae	Bifidobacterium
DGDQPEFXQAVR	COG0334 Glutamate dehydrogenase/leucine dehydrogenase	E	Bacteria	Actinobacteria	Actinobacteria	Bifidobacteriales	Bifidobacteriaceae	Bifidobacterium
VXXSAPAKDETTPTXVFGVNHETXK	COG0057 Glyceraldehyde-3-phosphate dehydrogenase/erythrose-4-phosphate dehydrogenase	G	Bacteria	Actinobacteria	Actinobacteria	Bifidobacteriales	Bifidobacteriaceae	Bifidobacterium	Bifidobacterium adolescentis
XAGVEXAVXDENTNAR	COG2160 L-arabinose isomerase	G	Bacteria	Actinobacteria	Actinobacteria	Bifidobacteriales	Bifidobacteriaceae	Bifidobacterium	Bifidobacterium adolescentis
AAEAEXPVFTVDR	COG1879 ABC-type sugar transport system, periplasmic component	G	Bacteria	Actinobacteria	Actinobacteria	Bifidobacteriales	Bifidobacteriaceae	Bifidobacterium
TSFAAEDXFR	COG2115 Xylose isomerase	G	Bacteria	Actinobacteria	Actinobacteria	Bifidobacteriales	Bifidobacteriaceae	Bifidobacterium
XGNXTVXFDANR	COG0021 Transketolase	G	Bacteria	Actinobacteria	Actinobacteria	Bifidobacteriales	Bifidobacteriaceae	Bifidobacterium
XQVPDGSVTEXTTVXNK	COG0057 Glyceraldehyde-3-phosphate dehydrogenase/erythrose-4-phosphate dehydrogenase	G	Bacteria	Actinobacteria	Actinobacteria	Bifidobacteriales	Bifidobacteriaceae	Bifidobacterium
VDYAFEFFQK	COG2115 Xylose isomerase	G	Bacteria	Actinobacteria	Actinobacteria	Bifidobacteriales	Bifidobacteriaceae	Bifidobacterium
GXWDXDKXPYVGR	COG2115 Xylose isomerase	G	Bacteria	Actinobacteria	Actinobacteria	Bifidobacteriales	Bifidobacteriaceae	Bifidobacterium
TYDXMDVFK	COG2115 Xylose isomerase	G	Bacteria	Actinobacteria	Actinobacteria	Bifidobacteriales	Bifidobacteriaceae	Bifidobacterium	Bifidobacterium adolescentis
YQXVDXETGEGXASGXVEK	COG0282 Acetate kinase	C	Bacteria	Actinobacteria	Actinobacteria	Bifidobacteriales	Bifidobacteriaceae	Bifidobacterium
VXGFFDEFGPK	COG0282 Acetate kinase	C	Bacteria	Actinobacteria	Actinobacteria	Bifidobacteriales	Bifidobacteriaceae	Bifidobacterium
VXGFFEEYGPNXSEAGXVAVGHR	COG0282 Acetate kinase	C	Bacteria	Actinobacteria	Actinobacteria	Bifidobacteriales	Bifidobacteriaceae	Bifidobacterium
EXWFGVGSQDXYGEEAXR	COG2160 L-arabinose isomerase	G	Bacteria	Actinobacteria	Actinobacteria	Bifidobacteriales	Bifidobacteriaceae	Bifidobacterium
SGEAPDXAQVGYAEXPEVFTK	COG1653 ABC-type sugar transport system, periplasmic component	G	Bacteria	Actinobacteria	Actinobacteria	Bifidobacteriales	Bifidobacteriaceae	Bifidobacterium	Bifidobacterium longum
FVSGASTSPFADXYAYAGGQXK	COG2115 Xylose isomerase	G	Bacteria	Actinobacteria	Actinobacteria	Bifidobacteriales	Bifidobacteriaceae	Bifidobacterium
FVSGASTSPFADXYAYAGGQXK	COG2115 Xylose isomerase	G	Bacteria	Actinobacteria	Actinobacteria	Bifidobacteriales	Bifidobacteriaceae	Bifidobacterium
SWDTVXADVQAGXDR	COG0176 Transaldolase	G	Bacteria	Actinobacteria	Actinobacteria	Bifidobacteriales	Bifidobacteriaceae	Bifidobacterium
FVNDEVDAXXXSSTEDSGWDDSXKK	COG1879 ABC-type sugar transport system, periplasmic component	G	Bacteria	Actinobacteria	Actinobacteria	Bifidobacteriales	Bifidobacteriaceae	Bifidobacterium
GXDPETTXFXXVSK	COG0166 Glucose-6-phosphate isomerase	G	Bacteria	Actinobacteria	Actinobacteria	Bifidobacteriales	Bifidobacteriaceae	Bifidobacterium
XQVPDGSVTEXTTVXNKEVTADEXNAAFK	COG0057 Glyceraldehyde-3-phosphate dehydrogenase/erythrose-4-phosphate dehydrogenase	G	Bacteria	Actinobacteria	Actinobacteria	Bifidobacteriales	Bifidobacteriaceae	Bifidobacterium
XNQXGTVTETXDAXEXATK	COG0148 Enolase	G	Bacteria	Actinobacteria	Actinobacteria	Bifidobacteriales	Bifidobacteriaceae	Bifidobacterium
XNQXGTVTETXDAXEXATK	COG0148 Enolase	G	Bacteria	Actinobacteria	Actinobacteria	Bifidobacteriales	Bifidobacteriaceae	Bifidobacterium
VQVPDGSVTEXTTVXNTETTADEXNAAFK	COG0057 Glyceraldehyde-3-phosphate dehydrogenase/erythrose-4-phosphate dehydrogenase	G	Bacteria	Actinobacteria	Actinobacteria	Bifidobacteriales	Bifidobacteriaceae	Bifidobacterium
GGQAGDXEVAAXNDXTTPATXAYXXK	COG0057 Glyceraldehyde-3-phosphate dehydrogenase/erythrose-4-phosphate dehydrogenase	G	Bacteria	Actinobacteria	Actinobacteria	Bifidobacteriales	Bifidobacteriaceae	Bifidobacterium
GGQAGDXEVAAXNDXTTPATXAYXXK	COG0057 Glyceraldehyde-3-phosphate dehydrogenase/erythrose-4-phosphate dehydrogenase	G	Bacteria	Actinobacteria	Actinobacteria	Bifidobacteriales	Bifidobacteriaceae	Bifidobacterium
XGANAXXGVSXAAXYASAESADQPXYR	COG0148 Enolase	G	Bacteria	Actinobacteria	Actinobacteria	Bifidobacteriales	Bifidobacteriaceae	Bifidobacterium	Bifidobacterium adolescentis
ANPTAAXXSAAMXXEHXGFDDAAK	COG0473 Isocitrate/isopropylmalate dehydrogenase	CE	Bacteria	Actinobacteria	Actinobacteria	Bifidobacteriales	Bifidobacteriaceae	Bifidobacterium
FAEXFETVFDEXCDXK	COG3957 Phosphoketolase	G	Bacteria	Actinobacteria	Actinobacteria	Bifidobacteriales	Bifidobacteriaceae	Bifidobacterium
FAEXFETVFDEXCDXK	COG3957 Phosphoketolase	G	Bacteria	Actinobacteria	Actinobacteria	Bifidobacteriales	Bifidobacteriaceae	Bifidobacterium
XQAAYDVTNK	COG3957 Phosphoketolase	G	Bacteria	Actinobacteria	Actinobacteria	Bifidobacteriales	Bifidobacteriaceae	Bifidobacterium
XQAAYDVTNK	COG3957 Phosphoketolase	G	Bacteria	Actinobacteria	Actinobacteria	Bifidobacteriales	Bifidobacteriaceae	Bifidobacterium
VQRPXWASTGTK	COG0176 Transaldolase	G	Bacteria	Actinobacteria	Actinobacteria	Bifidobacteriales	Bifidobacteriaceae	Bifidobacterium
VTDAETGEXVR	COG1070 Sugar (pentulose and hexulose) kinases	G	Bacteria	Actinobacteria	Actinobacteria	Bifidobacteriales	Bifidobacteriaceae	Bifidobacterium
AXHEVGPYDPQXK	COG0176 Transaldolase	G	Bacteria	Actinobacteria	Actinobacteria	Bifidobacteriales	Bifidobacteriaceae	Bifidobacterium
XAYEXFENK	COG0176 Transaldolase	G	Bacteria	Actinobacteria	Actinobacteria	Bifidobacteriales	Bifidobacteriaceae	Bifidobacterium
VXHEEYPDVNPEYDFNQXDSAPEEAAR	COG0050 GTPases - translation elongation factors	J	Bacteria	Actinobacteria	Actinobacteria	Bifidobacteriales	Bifidobacteriaceae	Bifidobacterium
XEXVGATXNXXK	COG0039 Malate/lactate dehydrogenases	C	Bacteria	Actinobacteria	Actinobacteria	Bifidobacteriales	Bifidobacteriaceae	Bifidobacterium
AAEXXDXTEYXDR	COG3839 ABC-type sugar transport systems, ATPase components	G	Bacteria	Actinobacteria	Actinobacteria	Bifidobacteriales	Bifidobacteriaceae	Bifidobacterium
SWDTVXADVQAGXDR	COG0176 Transaldolase	G	Bacteria	Actinobacteria	Actinobacteria	Bifidobacteriales	Bifidobacteriaceae	Bifidobacterium
XGEXXGXTVPXAADTYGEDAQAK	COG0126 3-phosphoglycerate kinase	G	Bacteria	Actinobacteria	Actinobacteria	Bifidobacteriales	Bifidobacteriaceae	Bifidobacterium	Bifidobacterium adolescentis
TVEKDXEXESK	COG1879 ABC-type sugar transport system, periplasmic component	G	Bacteria	Actinobacteria	Actinobacteria	Bifidobacteriales	Bifidobacteriaceae	Bifidobacterium
VQRPXWASTGTK	COG0176 Transaldolase	G	Bacteria	Actinobacteria	Actinobacteria	Bifidobacteriales	Bifidobacteriaceae	Bifidobacterium
XQEEYSHPHXETVGPK	COG0059 Ketol-acid reductoisomerase	EH	Bacteria	Actinobacteria	Actinobacteria	Bifidobacteriales	Bifidobacteriaceae	Bifidobacterium
AXHEVGPYDPQXK	COG0176 Transaldolase	G	Bacteria	Actinobacteria	Actinobacteria	Bifidobacteriales	Bifidobacteriaceae	Bifidobacterium
DSGVDVVVGXRPTSK	COG0059 Ketol-acid reductoisomerase	EH	Bacteria	Actinobacteria	Actinobacteria	Bifidobacteriales	Bifidobacteriaceae	Bifidobacterium
XAYEXFENK	COG0176 Transaldolase	G	Bacteria	Actinobacteria	Actinobacteria	Bifidobacteriales	Bifidobacteriaceae	Bifidobacterium
VVNVVDXVK	COG3957 Phosphoketolase	G	Bacteria	Actinobacteria	Actinobacteria	Bifidobacteriales	Bifidobacteriaceae	Bifidobacterium
AAEAEXPVFTVDR	COG1879 ABC-type sugar transport system, periplasmic component	G	Bacteria	Actinobacteria	Actinobacteria	Bifidobacteriales	Bifidobacteriaceae	Bifidobacterium
VXHEEYPDVNPEYDFNQXDSAPEEAAR	COG0050 GTPases - translation elongation factors	J	Bacteria	Actinobacteria	Actinobacteria	Bifidobacteriales	Bifidobacteriaceae	Bifidobacterium
VXHEEFPDVNPEYDFNQXDSAPEEAAR	COG0050 GTPases - translation elongation factors	J	Bacteria	Actinobacteria	Actinobacteria	Bifidobacteriales	Bifidobacteriaceae	Bifidobacterium
XEXVGATXNXXK	COG0039 Malate/lactate dehydrogenases	C	Bacteria	Actinobacteria	Actinobacteria	Bifidobacteriales	Bifidobacteriaceae	Bifidobacterium
SWDTVXADVQAGXDR	COG0176 Transaldolase	G	Bacteria	Actinobacteria	Actinobacteria	Bifidobacteriales	Bifidobacteriaceae	Bifidobacterium
FAEXFETVFDEXCDXK	COG3957 Phosphoketolase	G	Bacteria	Actinobacteria	Actinobacteria	Bifidobacteriales	Bifidobacteriaceae	Bifidobacterium
XQASYEVTNK	COG3957 Phosphoketolase	G	Bacteria	Actinobacteria	Actinobacteria	Bifidobacteriales	Bifidobacteriaceae	Bifidobacterium
XQAAYDVTNK	COG3957 Phosphoketolase	G	Bacteria	Actinobacteria	Actinobacteria	Bifidobacteriales	Bifidobacteriaceae	Bifidobacterium
AXHEVGPYDPQXK	COG0176 Transaldolase	G	Bacteria	Actinobacteria	Actinobacteria	Bifidobacteriales	Bifidobacteriaceae	Bifidobacterium
NAADAATXSATXK	COG3250 Beta-galactosidase/beta-glucuronidase	G	Bacteria	Actinobacteria	Actinobacteria	Bifidobacteriales	Bifidobacteriaceae	Bifidobacterium	Bifidobacterium adolescentis
DYDDVTDXETR	COG3250 Beta-galactosidase/beta-glucuronidase	G	Bacteria	Actinobacteria	Actinobacteria	Bifidobacteriales	Bifidobacteriaceae	Bifidobacterium
XDRYEXTAEAXR	COG3957 Phosphoketolase	G	Bacteria	Actinobacteria	Actinobacteria	Bifidobacteriales	Bifidobacteriaceae	Bifidobacterium
FFGAGPEETYQDR	COG3250 Beta-galactosidase/beta-glucuronidase	G	Bacteria	Actinobacteria	Actinobacteria	Bifidobacteriales	Bifidobacteriaceae	Bifidobacterium
VNNXDRYEXQAEAXR	COG3957 Phosphoketolase	G	Bacteria	Actinobacteria	Actinobacteria	Bifidobacteriales	Bifidobacteriaceae	Bifidobacterium	Bifidobacterium adolescentis
XNAPVSEEAXEGVDK	COG3957 Phosphoketolase	G	Bacteria	Actinobacteria	Actinobacteria	Bifidobacteriales	Bifidobacteriaceae	Bifidobacterium
VVNVVDXVK	COG3957 Phosphoketolase	G	Bacteria	Actinobacteria	Actinobacteria	Bifidobacteriales	Bifidobacteriaceae	Bifidobacterium
XPNXEDYEVK	COG3957 Phosphoketolase	G	Bacteria	Actinobacteria	Actinobacteria	Bifidobacteriales	Bifidobacteriaceae	Bifidobacterium
NDXKXPNXEDYEVK	COG3957 Phosphoketolase	G	Bacteria	Actinobacteria	Actinobacteria	Bifidobacteriales	Bifidobacteriaceae	Bifidobacterium
ASQAWXTDPTVFEVNR	COG3250 Beta-galactosidase/beta-glucuronidase	G	Bacteria	Actinobacteria	Actinobacteria	Bifidobacteriales	Bifidobacteriaceae	Bifidobacterium
VANYXSXGQXYXR	COG3957 Phosphoketolase	G	Bacteria	Actinobacteria	Actinobacteria	Bifidobacteriales	Bifidobacteriaceae	Bifidobacterium
FKVVNVADXXSXQSAK	COG3957 Phosphoketolase	G	Bacteria	Actinobacteria	Actinobacteria	Bifidobacteriales	Bifidobacteriaceae	Bifidobacterium
AAAQTDDMTRPFYPMXXFR	COG3957 Phosphoketolase	G	Bacteria	Actinobacteria	Actinobacteria	Bifidobacteriales	Bifidobacteriaceae	Bifidobacterium
AXGXDTKPVFXGPYTFXK	COG0620 Methionine synthase II (cobalamin-independent)	E	Bacteria	Actinobacteria	Actinobacteria	Bifidobacteriales	Bifidobacteriaceae	Bifidobacterium
FVSGASTSPFADXYAYAGGQXK	COG2115 Xylose isomerase	G	Bacteria	Actinobacteria	Actinobacteria	Bifidobacteriales	Bifidobacteriaceae	Bifidobacterium
FVSGASTSPFADXYAYAGGQXK	COG2115 Xylose isomerase	G	Bacteria	Actinobacteria	Actinobacteria	Bifidobacteriales	Bifidobacteriaceae	Bifidobacterium
EAXGXPXXPTTTXGSFPQTK	COG0620 Methionine synthase II (cobalamin-independent)	E	Bacteria	Actinobacteria	Actinobacteria	Bifidobacteriales	Bifidobacteriaceae	Bifidobacterium
AKEPTMFQYDFDAATAXNFXR	COG2115 Xylose isomerase	G	Bacteria	Actinobacteria	Actinobacteria	Bifidobacteriales	Bifidobacteriaceae	Bifidobacterium	Bifidobacterium adolescentis
AVAQAXVDATAAGAFTXVGGGDSASAVR	COG0126 3-phosphoglycerate kinase	G	Bacteria	Actinobacteria	Actinobacteria	Bifidobacteriales	Bifidobacteriaceae	Bifidobacterium	Bifidobacterium adolescentis
XGANAXXGVSXAAXYASAESADQPXYR	COG0148 Enolase	G	Bacteria	Actinobacteria	Actinobacteria	Bifidobacteriales	Bifidobacteriaceae	Bifidobacterium	Bifidobacterium adolescentis
XQASYEVTNK	COG3957 Phosphoketolase	G	Bacteria	Actinobacteria	Actinobacteria	Bifidobacteriales	Bifidobacteriaceae	Bifidobacterium
GAVTATAATAGDNE	COG3957 Phosphoketolase	G	Bacteria	Actinobacteria	Actinobacteria	Bifidobacteriales	Bifidobacteriaceae	Bifidobacterium
XQASYEVTNK	COG3957 Phosphoketolase	G	Bacteria	Actinobacteria	Actinobacteria	Bifidobacteriales	Bifidobacteriaceae	Bifidobacterium
XQAAYDVTNK	COG3957 Phosphoketolase	G	Bacteria	Actinobacteria	Actinobacteria	Bifidobacteriales	Bifidobacteriaceae	Bifidobacterium
XQAAYDVTNK	COG3957 Phosphoketolase	G	Bacteria	Actinobacteria	Actinobacteria	Bifidobacteriales	Bifidobacteriaceae	Bifidobacterium
XQAAYDVTNK	COG3957 Phosphoketolase	G	Bacteria	Actinobacteria	Actinobacteria	Bifidobacteriales	Bifidobacteriaceae	Bifidobacterium
VSGDTYXGVER	NO COG		Bacteria	Actinobacteria	Actinobacteria	Bifidobacteriales	Bifidobacteriaceae	Bifidobacterium	Bifidobacterium longum
NAADAATXSATXK	COG3250 Beta-galactosidase/beta-glucuronidase	G	Bacteria	Actinobacteria	Actinobacteria	Bifidobacteriales	Bifidobacteriaceae	Bifidobacterium	Bifidobacterium adolescentis
DYDDVTDXETR	COG3250 Beta-galactosidase/beta-glucuronidase	G	Bacteria	Actinobacteria	Actinobacteria	Bifidobacteriales	Bifidobacteriaceae	Bifidobacterium
XDRYEXTAEAXR	COG3957 Phosphoketolase	G	Bacteria	Actinobacteria	Actinobacteria	Bifidobacteriales	Bifidobacteriaceae	Bifidobacterium
XDRYEXTAEAXR	COG3957 Phosphoketolase	G	Bacteria	Actinobacteria	Actinobacteria	Bifidobacteriales	Bifidobacteriaceae	Bifidobacterium
FFGAGPEETYQDR	COG3250 Beta-galactosidase/beta-glucuronidase	G	Bacteria	Actinobacteria	Actinobacteria	Bifidobacteriales	Bifidobacteriaceae	Bifidobacterium
TQGGXVSYTFNNR	COG3250 Beta-galactosidase/beta-glucuronidase	G	Bacteria	Actinobacteria	Actinobacteria	Bifidobacteriales	Bifidobacteriaceae	Bifidobacterium	Bifidobacterium adolescentis
VNNXDRYEXQAEAXR	COG3957 Phosphoketolase	G	Bacteria	Actinobacteria	Actinobacteria	Bifidobacteriales	Bifidobacteriaceae	Bifidobacterium	Bifidobacterium adolescentis
VVNVVDXVK	COG3957 Phosphoketolase	G	Bacteria	Actinobacteria	Actinobacteria	Bifidobacteriales	Bifidobacteriaceae	Bifidobacterium
XPNXEDYEVK	COG3957 Phosphoketolase	G	Bacteria	Actinobacteria	Actinobacteria	Bifidobacteriales	Bifidobacteriaceae	Bifidobacterium
NDXKXPNXEDYEVK	COG3957 Phosphoketolase	G	Bacteria	Actinobacteria	Actinobacteria	Bifidobacteriales	Bifidobacteriaceae	Bifidobacterium
XNAPVSEEAXEGVDKYWR	COG3957 Phosphoketolase	G	Bacteria	Actinobacteria	Actinobacteria	Bifidobacteriales	Bifidobacteriaceae	Bifidobacterium
XDVGXXEVADR / VDXGXXEVADR	COG3345 Alpha-galactosidase	G	Bacteria	Actinobacteria	Actinobacteria	Bifidobacteriales	Bifidobacteriaceae	Bifidobacterium
ASQAWXTDPTVFEVNR	COG3250 Beta-galactosidase/beta-glucuronidase	G	Bacteria	Actinobacteria	Actinobacteria	Bifidobacteriales	Bifidobacteriaceae	Bifidobacterium
FKVVNVADXXSXQSAK	COG3957 Phosphoketolase	G	Bacteria	Actinobacteria	Actinobacteria	Bifidobacteriales	Bifidobacteriaceae	Bifidobacterium
YGGDFGDRPSDYEFSGDGXXFADR	COG3250 Beta-galactosidase/beta-glucuronidase	G	Bacteria	Actinobacteria	Actinobacteria	Bifidobacteriales	Bifidobacteriaceae	Bifidobacterium
AAAQTDDMTRPFYPMXXFR	COG3957 Phosphoketolase	G	Bacteria	Actinobacteria	Actinobacteria	Bifidobacteriales	Bifidobacteriaceae	Bifidobacterium
AXGXDTKPVFXGPYTFXK	COG0620 Methionine synthase II (cobalamin-independent)	E	Bacteria	Actinobacteria	Actinobacteria	Bifidobacteriales	Bifidobacteriaceae	Bifidobacterium
NNDEAEVVXAAAGDVPTQEXMAASDK	COG3957 Phosphoketolase	G	Bacteria	Actinobacteria	Actinobacteria	Bifidobacteriales	Bifidobacteriaceae	Bifidobacterium
XGANAXXGVSXAAXYASAESADQPXYR	COG0148 Enolase	G	Bacteria	Actinobacteria	Actinobacteria	Bifidobacteriales	Bifidobacteriaceae	Bifidobacterium	Bifidobacterium adolescentis
VXGMDASDQR	COG0148 Enolase	G	Bacteria	Actinobacteria	Actinobacteria	Bifidobacteriales	Bifidobacteriaceae
YVVHETAAXAGK	COG0174 Glutamine synthetase	E	Bacteria	Actinobacteria	Actinobacteria	Bifidobacteriales	Bifidobacteriaceae
YVVHETAAXAGK	COG0174 Glutamine synthetase	E	Bacteria	Actinobacteria	Actinobacteria	Bifidobacteriales	Bifidobacteriaceae
XPXAGTSPAAK	COG0174 Glutamine synthetase	E	Bacteria	Actinobacteria	Actinobacteria	Bifidobacteriales	Bifidobacteriaceae
KXVVGHYTDPEVAEK	COG2160 L-arabinose isomerase	G	Bacteria	Actinobacteria	Actinobacteria	Bifidobacteriales	Bifidobacteriaceae
XGAEAVAGXK	COG0021 Transketolase	G	Bacteria	Actinobacteria	Actinobacteria	Bifidobacteriales	Bifidobacteriaceae
XFEXQAR	COG0057 Glyceraldehyde-3-phosphate dehydrogenase/erythrose-4-phosphate dehydrogenase	G	Bacteria	Actinobacteria	Actinobacteria	Bifidobacteriales	Bifidobacteriaceae
XGDRXQFVGDDXXVTNPAR	COG0148 Enolase	G	Bacteria	Actinobacteria	Actinobacteria	Bifidobacteriales	Bifidobacteriaceae
XQFVGDDXXVTNPAR	COG0148 Enolase	G	Bacteria	Actinobacteria	Actinobacteria	Bifidobacteriales	Bifidobacteriaceae
XXWNTSSXFTNPR	COG2115 Xylose isomerase	G	Bacteria	Actinobacteria	Actinobacteria	Bifidobacteriales	Bifidobacteriaceae
FTDXXGVQQHFTVPASEFXK	COG0174 Glutamine synthetase	E	Bacteria	Actinobacteria	Actinobacteria	Bifidobacteriales	Bifidobacteriaceae
STGXADTASFAPEAEFFXFDKVR	COG0174 Glutamine synthetase	E	Bacteria	Actinobacteria	Actinobacteria	Bifidobacteriales	Bifidobacteriaceae
XAPTPXEYEXYFHX	COG0174 Glutamine synthetase	E	Bacteria	Actinobacteria	Actinobacteria	Bifidobacteriales	Bifidobacteriaceae
YVVHETAAXAGK	COG0174 Glutamine synthetase	E	Bacteria	Actinobacteria	Actinobacteria	Bifidobacteriales	Bifidobacteriaceae
YVVHETAAXAGK	COG0174 Glutamine synthetase	E	Bacteria	Actinobacteria	Actinobacteria	Bifidobacteriales	Bifidobacteriaceae
XPXAGTSPAAK	COG0174 Glutamine synthetase	E	Bacteria	Actinobacteria	Actinobacteria	Bifidobacteriales	Bifidobacteriaceae
KXVVGHYTDPEVAEK	COG2160 L-arabinose isomerase	G	Bacteria	Actinobacteria	Actinobacteria	Bifidobacteriales	Bifidobacteriaceae
XFEXQAR	COG0057 Glyceraldehyde-3-phosphate dehydrogenase/erythrose-4-phosphate dehydrogenase	G	Bacteria	Actinobacteria	Actinobacteria	Bifidobacteriales	Bifidobacteriaceae
XAXYPXGXGGK	COG2160 L-arabinose isomerase	G	Bacteria	Actinobacteria	Actinobacteria	Bifidobacteriales	Bifidobacteriaceae
XGDRXQFVGDDXXVTNPAR	COG0148 Enolase	G	Bacteria	Actinobacteria	Actinobacteria	Bifidobacteriales	Bifidobacteriaceae
XQFVGDDXXVTNPAR	COG0148 Enolase	G	Bacteria	Actinobacteria	Actinobacteria	Bifidobacteriales	Bifidobacteriaceae
XXWNTSSXFTNPR	COG2115 Xylose isomerase	G	Bacteria	Actinobacteria	Actinobacteria	Bifidobacteriales	Bifidobacteriaceae
FTDXXGVQQHFTVPASEFXK	COG0174 Glutamine synthetase	E	Bacteria	Actinobacteria	Actinobacteria	Bifidobacteriales	Bifidobacteriaceae
XPATXEGXPAXTATXAK	COG0176 Transaldolase	G	Bacteria	Actinobacteria	Actinobacteria	Bifidobacteriales	Bifidobacteriaceae
STGXADTASFAPEAEFFXFDKVR	COG0174 Glutamine synthetase	E	Bacteria	Actinobacteria	Actinobacteria	Bifidobacteriales	Bifidobacteriaceae
STGXADTASFAPEAEFFXFDK	COG0174 Glutamine synthetase	E	Bacteria	Actinobacteria	Actinobacteria	Bifidobacteriales	Bifidobacteriaceae
STGXADTASFAPEAEFFXFDK	COG0174 Glutamine synthetase	E	Bacteria	Actinobacteria	Actinobacteria	Bifidobacteriales	Bifidobacteriaceae
YVVHETAAXAGK	COG0174 Glutamine synthetase	E	Bacteria	Actinobacteria	Actinobacteria	Bifidobacteriales	Bifidobacteriaceae
YVVHETAAXAGK	COG0174 Glutamine synthetase	E	Bacteria	Actinobacteria	Actinobacteria	Bifidobacteriales	Bifidobacteriaceae
KXVVGHYTDPEVAEK	COG2160 L-arabinose isomerase	G	Bacteria	Actinobacteria	Actinobacteria	Bifidobacteriales	Bifidobacteriaceae
XGAEAVAGXK	COG0021 Transketolase	G	Bacteria	Actinobacteria	Actinobacteria	Bifidobacteriales	Bifidobacteriaceae
DVTDKXEADGVAAFXK	COG0176 Transaldolase	G	Bacteria	Actinobacteria	Actinobacteria	Bifidobacteriales	Bifidobacteriaceae
AANYXSXGQXYXR	COG3957 Phosphoketolase	G	Bacteria	Actinobacteria	Actinobacteria	Bifidobacteriales	Bifidobacteriaceae
FTDXXGVQQHFTVPASEFXK	COG0174 Glutamine synthetase	E	Bacteria	Actinobacteria	Actinobacteria	Bifidobacteriales	Bifidobacteriaceae
XPATXEGXPAXTATXAK	COG0176 Transaldolase	G	Bacteria	Actinobacteria	Actinobacteria	Bifidobacteriales	Bifidobacteriaceae
XPATXEGXPAXTATXAK	COG0176 Transaldolase	G	Bacteria	Actinobacteria	Actinobacteria	Bifidobacteriales	Bifidobacteriaceae
STGXADTASFAPEAEFFXFDKVR	COG0174 Glutamine synthetase	E	Bacteria	Actinobacteria	Actinobacteria	Bifidobacteriales	Bifidobacteriaceae
XAPTPXEYEXYFHX	COG0174 Glutamine synthetase	E	Bacteria	Actinobacteria	Actinobacteria	Bifidobacteriales	Bifidobacteriaceae
STGXADTASFAPEAEFFXFDK	COG0174 Glutamine synthetase	E	Bacteria	Actinobacteria	Actinobacteria	Bifidobacteriales	Bifidobacteriaceae
STGXADTASFAPEAEFFXFDK	COG0174 Glutamine synthetase	E	Bacteria	Actinobacteria	Actinobacteria	Bifidobacteriales	Bifidobacteriaceae
GGQAGDXEVAAXNDXTTPSMXAYXXK	COG0057 Glyceraldehyde-3-phosphate dehydrogenase/erythrose-4-phosphate dehydrogenase	G	Bacteria	Actinobacteria	Actinobacteria	Bifidobacteriales	Bifidobacteriaceae
YVVHETAAXAGK	COG0174 Glutamine synthetase	E	Bacteria	Actinobacteria	Actinobacteria	Bifidobacteriales	Bifidobacteriaceae
YVVHETAAXAGK	COG0174 Glutamine synthetase	E	Bacteria	Actinobacteria	Actinobacteria	Bifidobacteriales	Bifidobacteriaceae
XPXAGTSPAAK	COG0174 Glutamine synthetase	E	Bacteria	Actinobacteria	Actinobacteria	Bifidobacteriales	Bifidobacteriaceae
VXGMDASDQR	COG0148 Enolase	G	Bacteria	Actinobacteria	Actinobacteria	Bifidobacteriales	Bifidobacteriaceae
KXVVGHYTDPEVAEK	COG2160 L-arabinose isomerase	G	Bacteria	Actinobacteria	Actinobacteria	Bifidobacteriales	Bifidobacteriaceae
XGAEAVAGXK	COG0021 Transketolase	G	Bacteria	Actinobacteria	Actinobacteria	Bifidobacteriales	Bifidobacteriaceae
NVVGVTTNPSXFQK	COG0176 Transaldolase	G	Bacteria	Actinobacteria	Actinobacteria	Bifidobacteriales	Bifidobacteriaceae
XESGSXQDXXANK	COG0176 Transaldolase	G	Bacteria	Actinobacteria	Actinobacteria	Bifidobacteriales	Bifidobacteriaceae
DVTDKXEADGVAAFXK	COG0176 Transaldolase	G	Bacteria	Actinobacteria	Actinobacteria	Bifidobacteriales	Bifidobacteriaceae
XXWNTSSXFTNPR	COG2115 Xylose isomerase	G	Bacteria	Actinobacteria	Actinobacteria	Bifidobacteriales	Bifidobacteriaceae
FTDXXGVQQHFTVPASEFXK	COG0174 Glutamine synthetase	E	Bacteria	Actinobacteria	Actinobacteria	Bifidobacteriales	Bifidobacteriaceae
FTDXXGVQQHFTVPASEFXK	COG0174 Glutamine synthetase	E	Bacteria	Actinobacteria	Actinobacteria	Bifidobacteriales	Bifidobacteriaceae
XPATXEGXPAXTATXAK	COG0176 Transaldolase	G	Bacteria	Actinobacteria	Actinobacteria	Bifidobacteriales	Bifidobacteriaceae
XPATXEGXPAXTATXAK	COG0176 Transaldolase	G	Bacteria	Actinobacteria	Actinobacteria	Bifidobacteriales	Bifidobacteriaceae
TSDSGVSXWXDDXSR	COG0176 Transaldolase	G	Bacteria	Actinobacteria	Actinobacteria	Bifidobacteriales	Bifidobacteriaceae
XXEXEEEXGSTAQYAGYSAFK	COG0148 Enolase	G	Bacteria	Actinobacteria	Actinobacteria	Bifidobacteriales	Bifidobacteriaceae
XXSTPDSSVXXAVXPTNEEXAXAR	COG0282 Acetate kinase	C	Bacteria	Actinobacteria	Actinobacteria	Bifidobacteriales	Bifidobacteriaceae
STGXADTASFAPEAEFFXFDK	COG0174 Glutamine synthetase	E	Bacteria	Actinobacteria	Actinobacteria	Bifidobacteriales	Bifidobacteriaceae
STGXADTASFAPEAEFFXFDK	COG0174 Glutamine synthetase	E	Bacteria	Actinobacteria	Actinobacteria	Bifidobacteriales	Bifidobacteriaceae
GGQAGDXEVAAXNDXTTPSMXAYXXK	COG0057 Glyceraldehyde-3-phosphate dehydrogenase/erythrose-4-phosphate dehydrogenase	G	Bacteria	Actinobacteria	Actinobacteria	Bifidobacteriales	Bifidobacteriaceae
YVVHETAAXAGK	COG0174 Glutamine synthetase	E	Bacteria	Actinobacteria	Actinobacteria	Bifidobacteriales	Bifidobacteriaceae
YVVHETAAXAGK	COG0174 Glutamine synthetase	E	Bacteria	Actinobacteria	Actinobacteria	Bifidobacteriales	Bifidobacteriaceae
KXVVGHYTDPEVAEK	COG2160 L-arabinose isomerase	G	Bacteria	Actinobacteria	Actinobacteria	Bifidobacteriales	Bifidobacteriaceae
XGAEAVAGXK	COG0021 Transketolase	G	Bacteria	Actinobacteria	Actinobacteria	Bifidobacteriales	Bifidobacteriaceae
NVVGVTTNPSXFQK	COG0176 Transaldolase	G	Bacteria	Actinobacteria	Actinobacteria	Bifidobacteriales	Bifidobacteriaceae
XESGSXQDXXANK	COG0176 Transaldolase	G	Bacteria	Actinobacteria	Actinobacteria	Bifidobacteriales	Bifidobacteriaceae
XGDRXQFVGDDXXVTNPAR	COG0148 Enolase	G	Bacteria	Actinobacteria	Actinobacteria	Bifidobacteriales	Bifidobacteriaceae
DVTDKXEADGVAAFXK	COG0176 Transaldolase	G	Bacteria	Actinobacteria	Actinobacteria	Bifidobacteriales	Bifidobacteriaceae
DVTDKXEADGVAAFXK	COG0176 Transaldolase	G	Bacteria	Actinobacteria	Actinobacteria	Bifidobacteriales	Bifidobacteriaceae
XQFVGDDXXVTNPAR	COG0148 Enolase	G	Bacteria	Actinobacteria	Actinobacteria	Bifidobacteriales	Bifidobacteriaceae
AANYXSXGQXYXR	COG3957 Phosphoketolase	G	Bacteria	Actinobacteria	Actinobacteria	Bifidobacteriales	Bifidobacteriaceae
XXWNTSSXFTNPR	COG2115 Xylose isomerase	G	Bacteria	Actinobacteria	Actinobacteria	Bifidobacteriales	Bifidobacteriaceae
YQXVDXESGEGXASGXVEK	COG0282 Acetate kinase	C	Bacteria	Actinobacteria	Actinobacteria	Bifidobacteriales	Bifidobacteriaceae
FTDXXGVQQHFTVPASEFXK	COG0174 Glutamine synthetase	E	Bacteria	Actinobacteria	Actinobacteria	Bifidobacteriales	Bifidobacteriaceae
XPATXEGXPAXTATXAK	COG0176 Transaldolase	G	Bacteria	Actinobacteria	Actinobacteria	Bifidobacteriales	Bifidobacteriaceae
TSDSGVSXWXDDXSR	COG0176 Transaldolase	G	Bacteria	Actinobacteria	Actinobacteria	Bifidobacteriales	Bifidobacteriaceae
STGXADTASFAPEAEFFXFDKVR	COG0174 Glutamine synthetase	E	Bacteria	Actinobacteria	Actinobacteria	Bifidobacteriales	Bifidobacteriaceae
STGXADTASFAPEAEFFXFDK	COG0174 Glutamine synthetase	E	Bacteria	Actinobacteria	Actinobacteria	Bifidobacteriales	Bifidobacteriaceae
GGQAGDXEVAAXNDXTTPSMXAYXXK	COG0057 Glyceraldehyde-3-phosphate dehydrogenase/erythrose-4-phosphate dehydrogenase	G	Bacteria	Actinobacteria	Actinobacteria	Bifidobacteriales	Bifidobacteriaceae
YVVHETAAXAGK	COG0174 Glutamine synthetase	E	Bacteria	Actinobacteria	Actinobacteria	Bifidobacteriales	Bifidobacteriaceae
YVVHETAAXAGK	COG0174 Glutamine synthetase	E	Bacteria	Actinobacteria	Actinobacteria	Bifidobacteriales	Bifidobacteriaceae
KXVVGHYTDPEVAEK	COG2160 L-arabinose isomerase	G	Bacteria	Actinobacteria	Actinobacteria	Bifidobacteriales	Bifidobacteriaceae
KXVVGHYTDPEVAEK	COG2160 L-arabinose isomerase	G	Bacteria	Actinobacteria	Actinobacteria	Bifidobacteriales	Bifidobacteriaceae
XGAEAVAGXK	COG0021 Transketolase	G	Bacteria	Actinobacteria	Actinobacteria	Bifidobacteriales	Bifidobacteriaceae
XGDRXQFVGDDXXVTNPAR	COG0148 Enolase	G	Bacteria	Actinobacteria	Actinobacteria	Bifidobacteriales	Bifidobacteriaceae
DVTDKXEADGVAAFXK	COG0176 Transaldolase	G	Bacteria	Actinobacteria	Actinobacteria	Bifidobacteriales	Bifidobacteriaceae
XQFVGDDXXVTNPAR	COG0148 Enolase	G	Bacteria	Actinobacteria	Actinobacteria	Bifidobacteriales	Bifidobacteriaceae
AANYXSXGQXYXR	COG3957 Phosphoketolase	G	Bacteria	Actinobacteria	Actinobacteria	Bifidobacteriales	Bifidobacteriaceae
XXWNTSSXFTNPR	COG2115 Xylose isomerase	G	Bacteria	Actinobacteria	Actinobacteria	Bifidobacteriales	Bifidobacteriaceae
FTDXXGVQQHFTVPASEFXK	COG0174 Glutamine synthetase	E	Bacteria	Actinobacteria	Actinobacteria	Bifidobacteriales	Bifidobacteriaceae
XPATXEGXPAXTATXAK	COG0176 Transaldolase	G	Bacteria	Actinobacteria	Actinobacteria	Bifidobacteriales	Bifidobacteriaceae
TSDSGVSXWXDDXSR	COG0176 Transaldolase	G	Bacteria	Actinobacteria	Actinobacteria	Bifidobacteriales	Bifidobacteriaceae
XXEXEEEXGSTAQYAGYSAFK	COG0148 Enolase	G	Bacteria	Actinobacteria	Actinobacteria	Bifidobacteriales	Bifidobacteriaceae
STGXADTASFAPEAEFFXFDKVR	COG0174 Glutamine synthetase	E	Bacteria	Actinobacteria	Actinobacteria	Bifidobacteriales	Bifidobacteriaceae
STGXADTASFAPEAEFFXFDK	COG0174 Glutamine synthetase	E	Bacteria	Actinobacteria	Actinobacteria	Bifidobacteriales	Bifidobacteriaceae
STGXADTASFAPEAEFFXFDK	COG0174 Glutamine synthetase	E	Bacteria	Actinobacteria	Actinobacteria	Bifidobacteriales	Bifidobacteriaceae
GGQAGDXEVAAXNDXTTPSMXAYXXK	COG0057 Glyceraldehyde-3-phosphate dehydrogenase/erythrose-4-phosphate dehydrogenase	G	Bacteria	Actinobacteria	Actinobacteria	Bifidobacteriales	Bifidobacteriaceae
GGQAGDXEVAAXNDXTTPSMXAYXXK	COG0057 Glyceraldehyde-3-phosphate dehydrogenase/erythrose-4-phosphate dehydrogenase	G	Bacteria	Actinobacteria	Actinobacteria	Bifidobacteriales	Bifidobacteriaceae
YVVHETAAXAGK	COG0174 Glutamine synthetase	E	Bacteria	Actinobacteria	Actinobacteria	Bifidobacteriales	Bifidobacteriaceae
YVVHETAAXAGK	COG0174 Glutamine synthetase	E	Bacteria	Actinobacteria	Actinobacteria	Bifidobacteriales	Bifidobacteriaceae
VXGMDASDQR	COG0148 Enolase	G	Bacteria	Actinobacteria	Actinobacteria	Bifidobacteriales	Bifidobacteriaceae
VXGMDASDQR	COG0148 Enolase	G	Bacteria	Actinobacteria	Actinobacteria	Bifidobacteriales	Bifidobacteriaceae
KXVVGHYTDPEVAEK	COG2160 L-arabinose isomerase	G	Bacteria	Actinobacteria	Actinobacteria	Bifidobacteriales	Bifidobacteriaceae
XGAEAVAGXK	COG0021 Transketolase	G	Bacteria	Actinobacteria	Actinobacteria	Bifidobacteriales	Bifidobacteriaceae
XESGSXQDXXANK	COG0176 Transaldolase	G	Bacteria	Actinobacteria	Actinobacteria	Bifidobacteriales	Bifidobacteriaceae
DVTDKXEADGVAAFXK	COG0176 Transaldolase	G	Bacteria	Actinobacteria	Actinobacteria	Bifidobacteriales	Bifidobacteriaceae
DVTDKXEADGVAAFXK	COG0176 Transaldolase	G	Bacteria	Actinobacteria	Actinobacteria	Bifidobacteriales	Bifidobacteriaceae
AANYXSXGQXYXR	COG3957 Phosphoketolase	G	Bacteria	Actinobacteria	Actinobacteria	Bifidobacteriales	Bifidobacteriaceae
XXWNTSSXFTNPR	COG2115 Xylose isomerase	G	Bacteria	Actinobacteria	Actinobacteria	Bifidobacteriales	Bifidobacteriaceae
FTDXXGVQQHFTVPASEFXK	COG0174 Glutamine synthetase	E	Bacteria	Actinobacteria	Actinobacteria	Bifidobacteriales	Bifidobacteriaceae
FTDXXGVQQHFTVPASEFXK	COG0174 Glutamine synthetase	E	Bacteria	Actinobacteria	Actinobacteria	Bifidobacteriales	Bifidobacteriaceae
XPATXEGXPAXTATXAK	COG0176 Transaldolase	G	Bacteria	Actinobacteria	Actinobacteria	Bifidobacteriales	Bifidobacteriaceae
TSDSGVSXWXDDXSR	COG0176 Transaldolase	G	Bacteria	Actinobacteria	Actinobacteria	Bifidobacteriales	Bifidobacteriaceae
XXEXEEEXGSTAQYAGYSAFK	COG0148 Enolase	G	Bacteria	Actinobacteria	Actinobacteria	Bifidobacteriales	Bifidobacteriaceae
XXEXEEEXGSTAQYAGYSAFK	COG0148 Enolase	G	Bacteria	Actinobacteria	Actinobacteria	Bifidobacteriales	Bifidobacteriaceae
XXSTPDSSVXXAVXPTNEEXAXAR	COG0282 Acetate kinase	C	Bacteria	Actinobacteria	Actinobacteria	Bifidobacteriales	Bifidobacteriaceae
STGXADTASFAPEAEFFXFDK	COG0174 Glutamine synthetase	E	Bacteria	Actinobacteria	Actinobacteria	Bifidobacteriales	Bifidobacteriaceae
STGXADTASFAPEAEFFXFDK	COG0174 Glutamine synthetase	E	Bacteria	Actinobacteria	Actinobacteria	Bifidobacteriales	Bifidobacteriaceae
GGQAGDXEVAAXNDXTTPSMXAYXXK	COG0057 Glyceraldehyde-3-phosphate dehydrogenase/erythrose-4-phosphate dehydrogenase	G	Bacteria	Actinobacteria	Actinobacteria	Bifidobacteriales	Bifidobacteriaceae
YVVHETAAXAGK	COG0174 Glutamine synthetase	E	Bacteria	Actinobacteria	Actinobacteria	Bifidobacteriales	Bifidobacteriaceae
YVVHETAAXAGK	COG0174 Glutamine synthetase	E	Bacteria	Actinobacteria	Actinobacteria	Bifidobacteriales	Bifidobacteriaceae
KXVVGHYTDPEVAEK	COG2160 L-arabinose isomerase	G	Bacteria	Actinobacteria	Actinobacteria	Bifidobacteriales	Bifidobacteriaceae
XGAEAVAGXK	COG0021 Transketolase	G	Bacteria	Actinobacteria	Actinobacteria	Bifidobacteriales	Bifidobacteriaceae
NVVGVTTNPSXFQK	COG0176 Transaldolase	G	Bacteria	Actinobacteria	Actinobacteria	Bifidobacteriales	Bifidobacteriaceae
XAEXGXNXK	COG0176 Transaldolase	G	Bacteria	Actinobacteria	Actinobacteria	Bifidobacteriales	Bifidobacteriaceae
XESGSXQDXXANK	COG0176 Transaldolase	G	Bacteria	Actinobacteria	Actinobacteria	Bifidobacteriales	Bifidobacteriaceae
XGDRXQFVGDDXXVTNPAR	COG0148 Enolase	G	Bacteria	Actinobacteria	Actinobacteria	Bifidobacteriales	Bifidobacteriaceae
DVTDKXEADGVAAFXK	COG0176 Transaldolase	G	Bacteria	Actinobacteria	Actinobacteria	Bifidobacteriales	Bifidobacteriaceae
DVTDKXEADGVAAFXK	COG0176 Transaldolase	G	Bacteria	Actinobacteria	Actinobacteria	Bifidobacteriales	Bifidobacteriaceae
XXWNTSSXFTNPR	COG2115 Xylose isomerase	G	Bacteria	Actinobacteria	Actinobacteria	Bifidobacteriales	Bifidobacteriaceae
FTDXXGVQQHFTVPASEFXK	COG0174 Glutamine synthetase	E	Bacteria	Actinobacteria	Actinobacteria	Bifidobacteriales	Bifidobacteriaceae
XPATXEGXPAXTATXAK	COG0176 Transaldolase	G	Bacteria	Actinobacteria	Actinobacteria	Bifidobacteriales	Bifidobacteriaceae
XPATXEGXPAXTATXAK	COG0176 Transaldolase	G	Bacteria	Actinobacteria	Actinobacteria	Bifidobacteriales	Bifidobacteriaceae
TSDSGVSXWXDDXSR	COG0176 Transaldolase	G	Bacteria	Actinobacteria	Actinobacteria	Bifidobacteriales	Bifidobacteriaceae
NDGVEFVXECTGFYTSAEK	COG0057 Glyceraldehyde-3-phosphate dehydrogenase/erythrose-4-phosphate dehydrogenase	G	Bacteria	Actinobacteria	Actinobacteria	Bifidobacteriales	Bifidobacteriaceae
XXEXEEEXGSTAQYAGYSAFK	COG0148 Enolase	G	Bacteria	Actinobacteria	Actinobacteria	Bifidobacteriales	Bifidobacteriaceae
STGXADTASFAPEAEFFXFDKVR	COG0174 Glutamine synthetase	E	Bacteria	Actinobacteria	Actinobacteria	Bifidobacteriales	Bifidobacteriaceae
STGXADTASFAPEAEFFXFDK	COG0174 Glutamine synthetase	E	Bacteria	Actinobacteria	Actinobacteria	Bifidobacteriales	Bifidobacteriaceae
STGXADTASFAPEAEFFXFDK	COG0174 Glutamine synthetase	E	Bacteria	Actinobacteria	Actinobacteria	Bifidobacteriales	Bifidobacteriaceae
GGQAGDXEVAAXNDXTTPSMXAYXXK	COG0057 Glyceraldehyde-3-phosphate dehydrogenase/erythrose-4-phosphate dehydrogenase	G	Bacteria	Actinobacteria	Actinobacteria	Bifidobacteriales	Bifidobacteriaceae
GGQAGDXEVAAXNDXTTPSMXAYXXK	COG0057 Glyceraldehyde-3-phosphate dehydrogenase/erythrose-4-phosphate dehydrogenase	G	Bacteria	Actinobacteria	Actinobacteria	Bifidobacteriales	Bifidobacteriaceae
FXXAQQTGVNVK	COG0039 Malate/lactate dehydrogenases	C	Bacteria	Actinobacteria	Actinobacteria	Bifidobacteriales	Bifidobacteriaceae
XESGSXQDXXANK	COG0176 Transaldolase	G	Bacteria	Actinobacteria	Actinobacteria	Bifidobacteriales	Bifidobacteriaceae
DVTDKXEADGVAAFXK	COG0176 Transaldolase	G	Bacteria	Actinobacteria	Actinobacteria	Bifidobacteriales	Bifidobacteriaceae
XAAXGEVFVSDGFGVVHR	COG0126 3-phosphoglycerate kinase	G	Bacteria	Actinobacteria	Actinobacteria	Bifidobacteriales	Bifidobacteriaceae
XPATXEGXPAXTATXAK	COG0176 Transaldolase	G	Bacteria	Actinobacteria	Actinobacteria	Bifidobacteriales	Bifidobacteriaceae
XPATXEGXPAXTATXAK	COG0176 Transaldolase	G	Bacteria	Actinobacteria	Actinobacteria	Bifidobacteriales	Bifidobacteriaceae
AQGSNYDVAADXPAAAGXXVEK	COG0126 3-phosphoglycerate kinase	G	Bacteria	Actinobacteria	Actinobacteria	Bifidobacteriales	Bifidobacteriaceae
TSDSGVSXWXDDXSR	COG0176 Transaldolase	G	Bacteria	Actinobacteria	Actinobacteria	Bifidobacteriales	Bifidobacteriaceae
XNXQFFSFR	COG1085 Galactose-1-phosphate uridylyltransferase	C	Bacteria	Actinobacteria	Actinobacteria	Bifidobacteriales	Bifidobacteriaceae
STGXADTASFAPEAEFFXFDK	COG0174 Glutamine synthetase	E	Bacteria	Actinobacteria	Actinobacteria	Bifidobacteriales	Bifidobacteriaceae
FXXAQQTGVNVK	COG0039 Malate/lactate dehydrogenases	C	Bacteria	Actinobacteria	Actinobacteria	Bifidobacteriales	Bifidobacteriaceae
NVVGVTTNPSXFQK	COG0176 Transaldolase	G	Bacteria	Actinobacteria	Actinobacteria	Bifidobacteriales	Bifidobacteriaceae
AANYXSXGQXYXR	COG3957 Phosphoketolase	G	Bacteria	Actinobacteria	Actinobacteria	Bifidobacteriales	Bifidobacteriaceae
XPATXEGXPAXTATXAK	COG0176 Transaldolase	G	Bacteria	Actinobacteria	Actinobacteria	Bifidobacteriales	Bifidobacteriaceae
XPATXEGXPAXTATXAK	COG0176 Transaldolase	G	Bacteria	Actinobacteria	Actinobacteria	Bifidobacteriales	Bifidobacteriaceae
TSDSGVSXWXDDXSR	COG0176 Transaldolase	G	Bacteria	Actinobacteria	Actinobacteria	Bifidobacteriales	Bifidobacteriaceae
AQGSNYDVAADXPAAAGXXVEK	COG0126 3-phosphoglycerate kinase	G	Bacteria	Actinobacteria	Actinobacteria	Bifidobacteriales	Bifidobacteriaceae
XNXQFFSFR	COG1085 Galactose-1-phosphate uridylyltransferase	C	Bacteria	Actinobacteria	Actinobacteria	Bifidobacteriales	Bifidobacteriaceae
GAAAWDWASTAK	COG3957 Phosphoketolase	G	Bacteria	Actinobacteria	Actinobacteria	Bifidobacteriales	Bifidobacteriaceae
HXGSVASFFVSR	COG0176 Transaldolase	G	Bacteria	Actinobacteria	Actinobacteria	Bifidobacteriales	Bifidobacteriaceae
XESGSXQDXXANK	COG0176 Transaldolase	G	Bacteria	Actinobacteria	Actinobacteria	Bifidobacteriales	Bifidobacteriaceae
DVTDKXEADGVAAFXK	COG0176 Transaldolase	G	Bacteria	Actinobacteria	Actinobacteria	Bifidobacteriales	Bifidobacteriaceae
XPATXEGXPAXTATXAK	COG0176 Transaldolase	G	Bacteria	Actinobacteria	Actinobacteria	Bifidobacteriales	Bifidobacteriaceae
XPATXEGXPAXTATXAK	COG0176 Transaldolase	G	Bacteria	Actinobacteria	Actinobacteria	Bifidobacteriales	Bifidobacteriaceae
TSDSGVSXWXDDXSR	COG0176 Transaldolase	G	Bacteria	Actinobacteria	Actinobacteria	Bifidobacteriales	Bifidobacteriaceae
XXEXEEEXGSTAQYAGYSAFK	COG0148 Enolase	G	Bacteria	Actinobacteria	Actinobacteria	Bifidobacteriales	Bifidobacteriaceae
XXEXEEEXGSTAQYAGYSAFK	COG0148 Enolase	G	Bacteria	Actinobacteria	Actinobacteria	Bifidobacteriales	Bifidobacteriaceae
GAAAWDWASTAK	COG3957 Phosphoketolase	G	Bacteria	Actinobacteria	Actinobacteria	Bifidobacteriales	Bifidobacteriaceae
AANYXSXGQXYXR	COG3957 Phosphoketolase	G	Bacteria	Actinobacteria	Actinobacteria	Bifidobacteriales	Bifidobacteriaceae
NDGVEFVXECTGFYTSAEK	COG0057 Glyceraldehyde-3-phosphate dehydrogenase/erythrose-4-phosphate dehydrogenase	G	Bacteria	Actinobacteria	Actinobacteria	Bifidobacteriales	Bifidobacteriaceae
XXEXEEEXGSTAQYAGYSAFK	COG0148 Enolase	G	Bacteria	Actinobacteria	Actinobacteria	Bifidobacteriales	Bifidobacteriaceae
XXDXTTEEXEYXXK	COG0078 Ornithine carbamoyltransferase	E	Bacteria	Actinobacteria	Actinobacteria	Coriobacteriales	Coriobacteriaceae	Collinsella	Collinsella aerofaciens
EXXHXPGETNEEXXAAXVQK	COG1454 Alcohol dehydrogenase, class IV	C	Bacteria	Actinobacteria	Actinobacteria	Coriobacteriales	Coriobacteriaceae	Collinsella	Collinsella aerofaciens
EXXHXPGETNEEXXAAXVQK	COG1454 Alcohol dehydrogenase, class IV	C	Bacteria	Actinobacteria	Actinobacteria	Coriobacteriales	Coriobacteriaceae	Collinsella	Collinsella aerofaciens
EXXHXPGETNEEXXAAXVQK	COG1454 Alcohol dehydrogenase, class IV	C	Bacteria	Actinobacteria	Actinobacteria	Coriobacteriales	Coriobacteriaceae	Collinsella	Collinsella aerofaciens
EXXHXPGETNEEXXAAXVQK	COG1454 Alcohol dehydrogenase, class IV	C	Bacteria	Actinobacteria	Actinobacteria	Coriobacteriales	Coriobacteriaceae	Collinsella	Collinsella aerofaciens
EXXHXPGETNEEXXAAXVQK	COG1454 Alcohol dehydrogenase, class IV	C	Bacteria	Actinobacteria	Actinobacteria	Coriobacteriales	Coriobacteriaceae	Collinsella	Collinsella aerofaciens
XXDXTTEEXEYXXK	COG0078 Ornithine carbamoyltransferase	E	Bacteria	Actinobacteria	Actinobacteria	Coriobacteriales	Coriobacteriaceae	Collinsella	Collinsella aerofaciens
VXVSPWXXSVXTTDR	COG2222 Predicted phosphosugar isomerases	M	Bacteria	Actinobacteria	Actinobacteria	Coriobacteriales	Coriobacteriaceae	Collinsella	Collinsella aerofaciens
EXXHXPGETNEEXXAAXVQK	COG1454 Alcohol dehydrogenase, class IV	C	Bacteria	Actinobacteria	Actinobacteria	Coriobacteriales	Coriobacteriaceae	Collinsella	Collinsella aerofaciens
SQTAFSEGGXPVGASXDDXGK	COG0822 NifU homolog involved in Fe-S cluster formation	C	Bacteria	Actinobacteria	Actinobacteria	Coriobacteriales	Coriobacteriaceae	Collinsella
SQTAFSEGGXPVGASXDDXGK	COG0822 NifU homolog involved in Fe-S cluster formation	C	Bacteria	Actinobacteria	Actinobacteria	Coriobacteriales	Coriobacteriaceae	Collinsella
VTXQNAASVASXXXXTEATVSDVPK	COG0459 Chaperonin GroEL (HSP60 family)	O	Bacteria	Actinobacteria	Actinobacteria	Coriobacteriales	Coriobacteriaceae	Collinsella	Collinsella aerofaciens
GVVVDRPTPXQWNQAXGTPDFR	NO HITS		Bacteria	Actinobacteria	Actinobacteria	Coriobacteriales	Coriobacteriaceae
HXGPDTDVPAGDXGTGAR	COG0334 Glutamate dehydrogenase/leucine dehydrogenase	E	Bacteria	Actinobacteria	Actinobacteria	Coriobacteriales	Coriobacteriaceae
GVVVDRPTPXQWNQAXGTPDFR	NO HITS		Bacteria	Actinobacteria	Actinobacteria	Coriobacteriales	Coriobacteriaceae
HXGPDTDVPAGDXGTGAR	COG0334 Glutamate dehydrogenase/leucine dehydrogenase	E	Bacteria	Actinobacteria	Actinobacteria	Coriobacteriales	Coriobacteriaceae
HXGPDTDVPAGDXGTGAR	COG0334 Glutamate dehydrogenase/leucine dehydrogenase	E	Bacteria	Actinobacteria	Actinobacteria	Coriobacteriales	Coriobacteriaceae
HXGPDTDVPAGDXGTGAR	COG0334 Glutamate dehydrogenase/leucine dehydrogenase	E	Bacteria	Actinobacteria	Actinobacteria	Coriobacteriales	Coriobacteriaceae
NVAVTEGDKTEAER	COG2160 L-arabinose isomerase	G	Bacteria	Actinobacteria	Actinobacteria
NVAVTEGDKTEAER	COG2160 L-arabinose isomerase	G	Bacteria	Actinobacteria	Actinobacteria
XEXHPXGXGGK	COG2160 L-arabinose isomerase	G	Bacteria	Actinobacteria	Actinobacteria
TGDXDPAVVFHXXR	COG0282 Acetate kinase	C	Bacteria	Actinobacteria	Actinobacteria
NVAVTEGDKTEAER	COG2160 L-arabinose isomerase	G	Bacteria	Actinobacteria	Actinobacteria
XEXHPXGXGGK	COG2160 L-arabinose isomerase	G	Bacteria	Actinobacteria	Actinobacteria
XEXHPXGXGGK	COG2160 L-arabinose isomerase	G	Bacteria	Actinobacteria	Actinobacteria
TGDXDPAVVFHXXR	COG0282 Acetate kinase	C	Bacteria	Actinobacteria	Actinobacteria
TVXVXNSGSSSXK	COG0282 Acetate kinase	C	Bacteria	Actinobacteria	Actinobacteria
SHXAGMDAFAAGXXVAAK	COG2115 Xylose isomerase	G	Bacteria	Actinobacteria	Actinobacteria
SHXAGMDAFAAGXXVAAK	COG2115 Xylose isomerase	G	Bacteria	Actinobacteria	Actinobacteria
TVXVXNSGSSSXK	COG0282 Acetate kinase	C	Bacteria	Actinobacteria	Actinobacteria
GYAGXSDXAR	COG0174 Glutamine synthetase	E	Bacteria	Actinobacteria	Actinobacteria
SHXAGMDAFAAGXXVAAK	COG2115 Xylose isomerase	G	Bacteria	Actinobacteria	Actinobacteria
SHXAGMDAFAAGXXVAAK	COG2115 Xylose isomerase	G	Bacteria	Actinobacteria	Actinobacteria
TGDXDPAVVFHXXR	COG0282 Acetate kinase	C	Bacteria	Actinobacteria	Actinobacteria
GYAGXSDXAR	COG0174 Glutamine synthetase	E	Bacteria	Actinobacteria	Actinobacteria
SHXAGMDAFAAGXXVAAK	COG2115 Xylose isomerase	G	Bacteria	Actinobacteria	Actinobacteria
TGDXDPAVVFHXXR	COG0282 Acetate kinase	C	Bacteria	Actinobacteria	Actinobacteria
GYAGXSDXAR	COG0174 Glutamine synthetase	E	Bacteria	Actinobacteria	Actinobacteria
SHXAGMDAFAAGXXVAAK	COG2115 Xylose isomerase	G	Bacteria	Actinobacteria	Actinobacteria
TGDXDPAVVFHXXR	COG0282 Acetate kinase	C	Bacteria	Actinobacteria	Actinobacteria
GYAGXSDXAR	COG0174 Glutamine synthetase	E	Bacteria	Actinobacteria	Actinobacteria
SHXAGMDAFAAGXXVAAK	COG2115 Xylose isomerase	G	Bacteria	Actinobacteria	Actinobacteria
SHXAGMDAFAAGXXVAAK	COG2115 Xylose isomerase	G	Bacteria	Actinobacteria	Actinobacteria
SHXAGMDAFAAGXXVAAK	COG2115 Xylose isomerase	G	Bacteria	Actinobacteria	Actinobacteria
SHXAGMDAFAAGXXVAAK	COG2115 Xylose isomerase	G	Bacteria	Actinobacteria	Actinobacteria
TGDXDPAVVFHXXR	COG0282 Acetate kinase	C	Bacteria	Actinobacteria	Actinobacteria
AXADXXESXDEXR	COG1949 Oligoribonuclease (3'->5' exoribonuclease)	A	Bacteria	Actinobacteria	Actinobacteria
GXTXNXAHXEYQTEK	COG0050 GTPases - translation elongation factors	J	Bacteria	Actinobacteria	Actinobacteria
DTEAHFEVXK	COG3957 Phosphoketolase	G	Bacteria	Actinobacteria	Actinobacteria
DTEAHFEVXK	COG3957 Phosphoketolase	G	Bacteria	Actinobacteria	Actinobacteria
DTEAHFEVXK	COG3957 Phosphoketolase	G	Bacteria	Actinobacteria	Actinobacteria
XSFDAGDXHFDXSK	COG0166 Glucose-6-phosphate isomerase	G	Bacteria	Actinobacteria	Actinobacteria
DXXXTVGNEXMASANSFR	NO HITS		Bacteria	Actinobacteria	Actinobacteria
DTEAHFEVXK	COG3957 Phosphoketolase	G	Bacteria	Actinobacteria	Actinobacteria
XSFDAGDXHFDXSK	COG0166 Glucose-6-phosphate isomerase	G	Bacteria	Actinobacteria	Actinobacteria
DXXXTVGNEXMASANSFR	NO HITS		Bacteria	Actinobacteria	Actinobacteria
DTEAHFEVXK	COG3957 Phosphoketolase	G	Bacteria	Actinobacteria	Actinobacteria
XSFDAGDXHFDXSK	COG0166 Glucose-6-phosphate isomerase	G	Bacteria	Actinobacteria	Actinobacteria
DTEAHFEVXK	COG3957 Phosphoketolase	G	Bacteria	Actinobacteria	Actinobacteria
XSFDAGDXHFDXSK	COG0166 Glucose-6-phosphate isomerase	G	Bacteria	Actinobacteria	Actinobacteria
DTEAHFEVXK	COG3957 Phosphoketolase	G	Bacteria	Actinobacteria	Actinobacteria
DTEAHFEVXK	COG3957 Phosphoketolase	G	Bacteria	Actinobacteria	Actinobacteria
XVNSWNDWDPXKR	NO HITS		Bacteria	Actinobacteria	Actinobacteria
DTEAHFEVXK	COG3957 Phosphoketolase	G	Bacteria	Actinobacteria	Actinobacteria
DTEAHFEVXK	COG3957 Phosphoketolase	G	Bacteria	Actinobacteria	Actinobacteria
DTEAHFEVXK	COG3957 Phosphoketolase	G	Bacteria	Actinobacteria	Actinobacteria
EGXFSDRXNMSR	COG0491 Zn-dependent hydrolases, including glyoxylases	R	Bacteria	Bacteroidetes	Bacteroidia	Bacteroidales	Bacteroidaceae	Bacteroides	Bacteroides fragilis
EGXFSDRXNMSR	COG0491 Zn-dependent hydrolases, including glyoxylases	R	Bacteria	Bacteroidetes	Bacteroidia	Bacteroidales	Bacteroidaceae	Bacteroides	Bacteroides fragilis
GFXTXAFDPSFTGESSGEPR	COG1073 Hydrolases of the alpha/beta superfamily	R	Bacteria	Bacteroidetes	Bacteroidia	Bacteroidales	Bacteroidaceae	Bacteroides	Bacteroides coprophilus
EGXFSDRXNMSR	COG0491 Zn-dependent hydrolases, including glyoxylases	R	Bacteria	Bacteroidetes	Bacteroidia	Bacteroidales	Bacteroidaceae	Bacteroides	Bacteroides fragilis
WDAXGAEYVVESTGXFXTK	COG0057 Glyceraldehyde-3-phosphate dehydrogenase/erythrose-4-phosphate dehydrogenase	G	Bacteria	Bacteroidetes	Bacteroidia	Bacteroidales	Bacteroidaceae	Bacteroides
EGXFSDRXNMSR	COG0491 Zn-dependent hydrolases, including glyoxylases	R	Bacteria	Bacteroidetes	Bacteroidia	Bacteroidales	Bacteroidaceae	Bacteroides	Bacteroides fragilis
XPAVQEXVEK	COG0443 Molecular chaperone	O	Bacteria	Bacteroidetes	Bacteroidia	Bacteroidales	Bacteroidaceae	Bacteroides
EGXFSDRXNMSR	COG0491 Zn-dependent hydrolases, including glyoxylases	R	Bacteria	Bacteroidetes	Bacteroidia	Bacteroidales	Bacteroidaceae	Bacteroides	Bacteroides fragilis
NDXQXVGXNDXCPVDYXAYMXK	COG0057 Glyceraldehyde-3-phosphate dehydrogenase/erythrose-4-phosphate dehydrogenase	G	Bacteria	Bacteroidetes	Bacteroidia	Bacteroidales	Bacteroidaceae	Bacteroides
EGXFSDRXNMSR	COG0491 Zn-dependent hydrolases, including glyoxylases	R	Bacteria	Bacteroidetes	Bacteroidia	Bacteroidales	Bacteroidaceae	Bacteroides	Bacteroides fragilis
AGDAAAAXKPGEVXXXENXR	COG0126 3-phosphoglycerate kinase	G	Bacteria	Bacteroidetes	Bacteroidia	Bacteroidales	Bacteroidaceae	Bacteroides
EXXNEYDFPGDDTPXXQGSAXK	COG0050 GTPases - translation elongation factors	J	Bacteria	Bacteroidetes	Bacteroidia	Bacteroidales	Bacteroidaceae	Bacteroides	Bacteroides pectinophilus
XVPPPXAFEVXDAVMEK / XVPPPXEFAVXDAVMEK	COG0191 Fructose/tagatose bisphosphate aldolase	G	Bacteria	Bacteroidetes	Bacteroidia	Bacteroidales	Bacteroidaceae	Bacteroides
EXFANPDVDGGXXGGAAXK	COG0149 Triosephosphate isomerase	G	Bacteria	Bacteroidetes	Bacteroidia	Bacteroidales	Bacteroidaceae	Bacteroides
VPTXDVSVVDXTVNXAKPATK	COG0057 Glyceraldehyde-3-phosphate dehydrogenase/erythrose-4-phosphate dehydrogenase	G	Bacteria	Bacteroidetes	Bacteroidia	Bacteroidales	Bacteroidaceae	Bacteroides	Bacteroides salanitronis
FSVXTPVGXXPXAVAGFDXEK	COG0166 Glucose-6-phosphate isomerase	G	Bacteria	Bacteroidetes	Bacteroidia	Bacteroidales	Bacteroidaceae	Bacteroides
VYAVNYDGTXVDPDGK	NO HITS		Bacteria	Bacteroidetes	Bacteroidia	Bacteroidales	Bacteroidaceae	Bacteroides
XXDXXNAXGAADK	NO HITS		Bacteria	Bacteroidetes	Bacteroidia	Bacteroidales	Bacteroidaceae	Bacteroides
VPXYXATSTFTPAVTADFAK	NO HITS		Bacteria	Bacteroidetes	Bacteroidia	Bacteroidales	Bacteroidaceae	Bacteroides
GTAFVDXTPXDGXXMTSR	NO HITS		Bacteria	Bacteroidetes	Bacteroidia	Bacteroidales	Bacteroidaceae	Bacteroides	Bacteroides eggerthii
DXNTXXQSAVENSFR	NO HITS		Bacteria	Bacteroidetes	Bacteroidia	Bacteroidales	Bacteroidaceae	Bacteroides	Bacteroides sp.
DAYGSSXSXESAK	NO HITS		Bacteria	Bacteroidetes	Bacteroidia	Bacteroidales	Bacteroidaceae	Bacteroides
AFNATQXGTVAAK	NO HITS		Bacteria	Bacteroidetes	Bacteroidia	Bacteroidales	Bacteroidaceae	Bacteroides	Bacteroides dorei
VYAVNYDGTXVDPDGK	NO HITS		Bacteria	Bacteroidetes	Bacteroidia	Bacteroidales	Bacteroidaceae	Bacteroides
GTAFVDXTPXDGXXMTSR	NO HITS		Bacteria	Bacteroidetes	Bacteroidia	Bacteroidales	Bacteroidaceae	Bacteroides	Bacteroides eggerthii
DXNTXXQSAVENSFR	NO HITS		Bacteria	Bacteroidetes	Bacteroidia	Bacteroidales	Bacteroidaceae	Bacteroides	Bacteroides sp.
VQAFXXDFAK	COG2195 Di- and tripeptidases	E	Bacteria	Bacteroidetes	Bacteroidia	Bacteroidales	Prevotellaceae	Prevotella	Prevotella disiens
SXXQAFXEPXDTXR	COG4806 L-rhamnose isomerase	G	Bacteria	Bacteroidetes	Bacteroidia	Bacteroidales	Prevotellaceae	Prevotella	Prevotella copri
VQAFXXDFAK	COG2195 Di- and tripeptidases	E	Bacteria	Bacteroidetes	Bacteroidia	Bacteroidales	Prevotellaceae	Prevotella	Prevotella disiens
FSVXTPVGXXPXAVAGFDVK	COG0166 Glucose-6-phosphate isomerase	G	Bacteria	Bacteroidetes	Bacteroidia	Bacteroidales	Prevotellaceae	Prevotella
SXXQAFXEPXDTXR	COG4806 L-rhamnose isomerase	G	Bacteria	Bacteroidetes	Bacteroidia	Bacteroidales	Prevotellaceae	Prevotella	Prevotella copri
FSVXTPVGXXPXAVAGFDVK	COG0166 Glucose-6-phosphate isomerase	G	Bacteria	Bacteroidetes	Bacteroidia	Bacteroidales	Prevotellaceae	Prevotella
FSVXTPVGXXPXAVAGFDVK	COG0166 Glucose-6-phosphate isomerase	G	Bacteria	Bacteroidetes	Bacteroidia	Bacteroidales	Prevotellaceae	Prevotella
MGAEVFHAXAK	COG0148 Enolase	G	Bacteria	Bacteroidetes	Bacteroidia	Bacteroidales	Prevotellaceae	Prevotella
YNFNAGPSXXPR	COG1932 Phosphoserine aminotransferase	HE	Bacteria	Bacteroidetes	Bacteroidia	Bacteroidales	Prevotellaceae	Prevotella
FXYYXNEXR	COG1073 Hydrolases of the alpha/beta superfamily	R	Bacteria	Bacteroidetes	Bacteroidia	Bacteroidales	Prevotellaceae	Prevotella
FSVXTPVGXXPXAVAGFDVK	COG0166 Glucose-6-phosphate isomerase	G	Bacteria	Bacteroidetes	Bacteroidia	Bacteroidales	Prevotellaceae	Prevotella
SXXQAFXEPXDTXR	COG4806 L-rhamnose isomerase	G	Bacteria	Bacteroidetes	Bacteroidia	Bacteroidales	Prevotellaceae	Prevotella	Prevotella copri
FSVXTPVGXXPXAVAGFDVK	COG0166 Glucose-6-phosphate isomerase	G	Bacteria	Bacteroidetes	Bacteroidia	Bacteroidales	Prevotellaceae	Prevotella
SXXQAFXEPXDTXR	COG4806 L-rhamnose isomerase	G	Bacteria	Bacteroidetes	Bacteroidia	Bacteroidales	Prevotellaceae	Prevotella	Prevotella copri
FSVXTPVGXXPXAVAGFDVK	COG0166 Glucose-6-phosphate isomerase	G	Bacteria	Bacteroidetes	Bacteroidia	Bacteroidales	Prevotellaceae	Prevotella
YNFNAGPSXXPR	COG1932 Phosphoserine aminotransferase	HE	Bacteria	Bacteroidetes	Bacteroidia	Bacteroidales	Prevotellaceae	Prevotella
FXYYXNEXR	COG1073 Hydrolases of the alpha/beta superfamily	R	Bacteria	Bacteroidetes	Bacteroidia	Bacteroidales	Prevotellaceae	Prevotella
KXTHQFQGVXTGK	COG0334 Glutamate dehydrogenase/leucine dehydrogenase	E	Bacteria	Bacteroidetes	Bacteroidia	Bacteroidales	Prevotellaceae	Prevotella
XPDAVGXPEEQXTK	COG0191 Fructose/tagatose bisphosphate aldolase	G	Bacteria	Bacteroidetes	Bacteroidia	Bacteroidales	Prevotellaceae	Prevotella	Prevotella copri
NXXXAYEPXWAXGTGK	COG0149 Triosephosphate isomerase	G	Bacteria	Bacteroidetes	Bacteroidia	Bacteroidales	Prevotellaceae	Prevotella
XVPPPXAFDVXDAXMEK	COG0191 Fructose/tagatose bisphosphate aldolase	G	Bacteria	Bacteroidetes	Bacteroidia	Bacteroidales	Prevotellaceae	Prevotella
NXXXAYEPXWAXGTGK	COG0149 Triosephosphate isomerase	G	Bacteria	Bacteroidetes	Bacteroidia	Bacteroidales	Prevotellaceae	Prevotella
FSVXTPVGXXPXAVAGFDVK	COG0166 Glucose-6-phosphate isomerase	G	Bacteria	Bacteroidetes	Bacteroidia	Bacteroidales	Prevotellaceae	Prevotella
XXWGTANVFGHAR	COG2115 Xylose isomerase	G	Bacteria	Bacteroidetes	Bacteroidia	Bacteroidales
VXPYFDFVVPTEXPGVDPK	COG1866 Phosphoenolpyruvate carboxykinase (ATP)	C	Bacteria	Bacteroidetes	Bacteroidia	Bacteroidales
VXPYFDFVVPTEXPGVDPK	COG1866 Phosphoenolpyruvate carboxykinase (ATP)	C	Bacteria	Bacteroidetes	Bacteroidia	Bacteroidales
VXPYFDFVVPTEXPGVDPK	COG1866 Phosphoenolpyruvate carboxykinase (ATP)	C	Bacteria	Bacteroidetes	Bacteroidia	Bacteroidales
VXPYFDFVVPTEXPGVDPK	COG1866 Phosphoenolpyruvate carboxykinase (ATP)	C	Bacteria	Bacteroidetes	Bacteroidia	Bacteroidales
VXPYFDFVVPTEXPGVDPK	COG1866 Phosphoenolpyruvate carboxykinase (ATP)	C	Bacteria	Bacteroidetes	Bacteroidia	Bacteroidales
VXPYFDFVVPTEXPGVDPK	COG1866 Phosphoenolpyruvate carboxykinase (ATP)	C	Bacteria	Bacteroidetes	Bacteroidia	Bacteroidales
XXVTGAAGFXGSK	COG0451 Nucleoside-diphosphate-sugar epimerases	MG	Bacteria	Bacteroidetes	Bacteroidia	Bacteroidales
XVADXXSVAGXDR	COG0462 Phosphoribosylpyrophosphate synthetase	FE	Bacteria	Bacteroidetes	Bacteroidia	Bacteroidales
VXPYFDFVVPTEXPGVDPK	COG1866 Phosphoenolpyruvate carboxykinase (ATP)	C	Bacteria	Bacteroidetes	Bacteroidia	Bacteroidales
XXVTGAAGFXGSK	COG0451 Nucleoside-diphosphate-sugar epimerases	MG	Bacteria	Bacteroidetes	Bacteroidia	Bacteroidales
XVADXXSVAGXDR	COG0462 Phosphoribosylpyrophosphate synthetase	FE	Bacteria	Bacteroidetes	Bacteroidia	Bacteroidales
VXPYFDFVVPTEXPGVDPK	COG1866 Phosphoenolpyruvate carboxykinase (ATP)	C	Bacteria	Bacteroidetes	Bacteroidia	Bacteroidales
YGVHTDFXAR	COG0524 Sugar kinases, ribokinase family	G	Bacteria	Bacteroidetes
GXXDAXXDGSXDKAPTK	COG1866 Phosphoenolpyruvate carboxykinase (ATP)	C	Bacteria	Bacteroidetes
GXXDAXXDGSXDKAPTK	COG1866 Phosphoenolpyruvate carboxykinase (ATP)	C	Bacteria	Bacteroidetes
GXXDAXXDGSXDKAPTK	COG1866 Phosphoenolpyruvate carboxykinase (ATP)	C	Bacteria	Bacteroidetes
GXXDAXXDGSXDKAPTK	COG1866 Phosphoenolpyruvate carboxykinase (ATP)	C	Bacteria	Bacteroidetes
YGVHTDFXAR	COG0524 Sugar kinases, ribokinase family	G	Bacteria	Bacteroidetes
GXXDAXXDGSXDKAPTK	COG1866 Phosphoenolpyruvate carboxykinase (ATP)	C	Bacteria	Bacteroidetes
GVXGYTEDAVVSSDFXGDTR	COG0057 Glyceraldehyde-3-phosphate dehydrogenase/erythrose-4-phosphate dehydrogenase	G	Bacteria	Bacteroidetes
GXXDAXXDGSXDKAPTK	COG1866 Phosphoenolpyruvate carboxykinase (ATP)	C	Bacteria	Bacteroidetes
YGVHTDFXAR	COG0524 Sugar kinases, ribokinase family	G	Bacteria	Bacteroidetes
GXXDAXXDGSXDKAPTK	COG1866 Phosphoenolpyruvate carboxykinase (ATP)	C	Bacteria	Bacteroidetes
NSTDXEDXFXAHXAGMDAMAR	COG2115 Xylose isomerase	G	Bacteria	Bacteroidetes
YGVHTDFXAR	COG0524 Sugar kinases, ribokinase family	G	Bacteria	Bacteroidetes
GXXDAXXDGSXDKAPTK	COG1866 Phosphoenolpyruvate carboxykinase (ATP)	C	Bacteria	Bacteroidetes
XGXFDMXXXK	COG0157 Nicotinate-nucleotide pyrophosphorylase	H	Bacteria	Bacteroidetes
YRPQFYXR	COG0050 GTPases - translation elongation factors	J	Bacteria	Bacteroidetes
GXXDAXXDGSXDKAPTK	COG1866 Phosphoenolpyruvate carboxykinase (ATP)	C	Bacteria	Bacteroidetes
GXXDAXXDGSXDKAPTK	COG1866 Phosphoenolpyruvate carboxykinase (ATP)	C	Bacteria	Bacteroidetes
GVXGYTEDAVVSSDFXGDTR	COG0057 Glyceraldehyde-3-phosphate dehydrogenase/erythrose-4-phosphate dehydrogenase	G	Bacteria	Bacteroidetes
XGXFDMXXXK	COG0157 Nicotinate-nucleotide pyrophosphorylase	H	Bacteria	Bacteroidetes
VMXXDEPXSNXDAK	COG3839 ABC-type sugar transport systems, ATPase components	G	Bacteria	Firmicutes	Bacilli	Lactobacillales	Leoconostocaceae	Oenococcus	Oenococcus oeni
VMXXDEPXSNXDAK	COG3839 ABC-type sugar transport systems, ATPase components	G	Bacteria	Firmicutes	Bacilli	Lactobacillales	Leoconostocaceae	Oenococcus	Oenococcus oeni
VMXXDEPXSNXDAK	COG3839 ABC-type sugar transport systems, ATPase components	G	Bacteria	Firmicutes	Bacilli	Lactobacillales	Leoconostocaceae	Oenococcus	Oenococcus oeni
XKXETYXK	NO HITS		Bacteria	Firmicutes	Bacilli	Lactobacillales	Streptococcaceae	Streptococcus	Streptococcus vestibularis
XKXETYXK	NO HITS		Bacteria	Firmicutes	Bacilli	Lactobacillales	Streptococcaceae	Streptococcus	Streptococcus vestibularis
XYGYDXSGPATNAK	COG1882 Pyruvate-formate lyase	C	Bacteria	Firmicutes	Clostridia	Clostridiales	unclassified Clostridiales	unclassified Clostridiales	butyrate-producing bacterium
XYGYDXSGPATNAK	COG1882 Pyruvate-formate lyase	C	Bacteria	Firmicutes	Clostridia	Clostridiales	unclassified Clostridiales	unclassified Clostridiales	butyrate-producing bacterium
XYGYDXSGPATNAK	COG1882 Pyruvate-formate lyase	C	Bacteria	Firmicutes	Clostridia	Clostridiales	unclassified Clostridiales	unclassified Clostridiales	butyrate-producing bacterium
EXAFXGNAVENPVRPFVAXXGGAK	COG0126 3-phosphoglycerate kinase	G	Bacteria	Firmicutes	Clostridia	Clostridiales	unclassified Clostridiales	unclassified Clostridiales	butyrate-producing bacterium
XYGYDXSGPATNAK	COG1882 Pyruvate-formate lyase	C	Bacteria	Firmicutes	Clostridia	Clostridiales	unclassified Clostridiales	unclassified Clostridiales	butyrate-producing bacterium
XYGYDXSGPATNAK	COG1882 Pyruvate-formate lyase	C	Bacteria	Firmicutes	Clostridia	Clostridiales	unclassified Clostridiales	unclassified Clostridiales	butyrate-producing bacterium
XYGYDXSGPATNAK	COG1882 Pyruvate-formate lyase	C	Bacteria	Firmicutes	Clostridia	Clostridiales	unclassified Clostridiales	unclassified Clostridiales	butyrate-producing bacterium
EXAFXGNAVENPVRPFVAXXGGAK	COG0126 3-phosphoglycerate kinase	G	Bacteria	Firmicutes	Clostridia	Clostridiales	unclassified Clostridiales	unclassified Clostridiales	butyrate-producing bacterium
EXAFXGNAVENPVRPFVAXXGGAK	COG0126 3-phosphoglycerate kinase	G	Bacteria	Firmicutes	Clostridia	Clostridiales	unclassified Clostridiales	unclassified Clostridiales	butyrate-producing bacterium
XYGYDXSGPATNAK	COG1882 Pyruvate-formate lyase	C	Bacteria	Firmicutes	Clostridia	Clostridiales	unclassified Clostridiales	unclassified Clostridiales	butyrate-producing bacterium
XYGYDXSGPATNAK	COG1882 Pyruvate-formate lyase	C	Bacteria	Firmicutes	Clostridia	Clostridiales	unclassified Clostridiales	unclassified Clostridiales	butyrate-producing bacterium
XPXAXXVQVAGR	COG1614 CO dehydrogenase/acetyl-CoA synthase beta subunit	C	Bacteria	Firmicutes	Clostridia	Clostridiales	Clostridiaceae	Clostridium	Clostridium bartlettii
TXNVFEXAQXQVK	COG0334 Glutamate dehydrogenase/leucine dehydrogenase	E	Bacteria	Firmicutes	Clostridia	Clostridiales	Clostridiaceae	Clostridium	Clostridium bartlettii
XPXAXXVQVAGR	COG1614 CO dehydrogenase/acetyl-CoA synthase beta subunit	C	Bacteria	Firmicutes	Clostridia	Clostridiales	Clostridiaceae	Clostridium	Clostridium bartlettii
VTGEFAPGTYTGKPVDFYGSXAR	COG0334 Glutamate dehydrogenase/leucine dehydrogenase	E	Bacteria	Firmicutes	Clostridia	Clostridiales	Clostridiaceae	Clostridium	Clostridium bartlettii
GFAAAXAPFVGEK	COG0334 Glutamate dehydrogenase/leucine dehydrogenase	E	Bacteria	Firmicutes	Clostridia	Clostridiales	Clostridiaceae	Clostridium	Clostridium bartlettii
XPXAXXVQVAGR	COG1614 CO dehydrogenase/acetyl-CoA synthase beta subunit	C	Bacteria	Firmicutes	Clostridia	Clostridiales	Clostridiaceae	Clostridium	Clostridium bartlettii
TXNVFEXAQXQVK	COG0334 Glutamate dehydrogenase/leucine dehydrogenase	E	Bacteria	Firmicutes	Clostridia	Clostridiales	Clostridiaceae	Clostridium	Clostridium bartlettii
GGEXXXXSGXAXK	COG2508 Regulator of polyketide synthase expression	TQ	Bacteria	Firmicutes	Clostridia	Clostridiales	Clostridiaceae	Clostridium	Clostridium acetobutylicum
HVENXTKVYK	COG2759 Formyltetrahydrofolate synthetase	F	Bacteria	Firmicutes	Clostridia	Clostridiales	Clostridiaceae	Clostridium
VMEFNFPVK	COG0334 Glutamate dehydrogenase/leucine dehydrogenase	E	Bacteria	Firmicutes	Clostridia	Clostridiales	Clostridiaceae	Clostridium	Clostridium bartlettii
VTGEFAPGTYTGKPVDFYGSXAR	COG0334 Glutamate dehydrogenase/leucine dehydrogenase	E	Bacteria	Firmicutes	Clostridia	Clostridiales	Clostridiaceae	Clostridium	Clostridium bartlettii
GFAAAXAPFVGEK	COG0334 Glutamate dehydrogenase/leucine dehydrogenase	E	Bacteria	Firmicutes	Clostridia	Clostridiales	Clostridiaceae	Clostridium	Clostridium bartlettii
XPXAXXVQVAGR	COG1614 CO dehydrogenase/acetyl-CoA synthase beta subunit	C	Bacteria	Firmicutes	Clostridia	Clostridiales	Clostridiaceae	Clostridium	Clostridium bartlettii
HVENXTKVYK	COG2759 Formyltetrahydrofolate synthetase	F	Bacteria	Firmicutes	Clostridia	Clostridiales	Clostridiaceae	Clostridium
VTGEFAPGTYTGKPVDFYGSXAR	COG0334 Glutamate dehydrogenase/leucine dehydrogenase	E	Bacteria	Firmicutes	Clostridia	Clostridiales	Clostridiaceae	Clostridium	Clostridium bartlettii
XAXASNXEVXGVK	COG0282 Acetate kinase	C	Bacteria	Firmicutes	Clostridia	Clostridiales	Clostridiaceae	Clostridium	Clostridium bartlettii
GFAAAXAPFVGEK	COG0334 Glutamate dehydrogenase/leucine dehydrogenase	E	Bacteria	Firmicutes	Clostridia	Clostridiales	Clostridiaceae	Clostridium	Clostridium bartlettii
XPXAXXVQVAGR	COG1614 CO dehydrogenase/acetyl-CoA synthase beta subunit	C	Bacteria	Firmicutes	Clostridia	Clostridiales	Clostridiaceae	Clostridium	Clostridium bartlettii
TXNVFEXAQXQVK	COG0334 Glutamate dehydrogenase/leucine dehydrogenase	E	Bacteria	Firmicutes	Clostridia	Clostridiales	Clostridiaceae	Clostridium	Clostridium bartlettii
SNEEAXEVXXEAXTK	COG0148 Enolase	G	Bacteria	Firmicutes	Clostridia	Clostridiales	Clostridiaceae	Clostridium	Clostridium sp.
VTGEFAPGTYTGKPVDFYGSXAR	COG0334 Glutamate dehydrogenase/leucine dehydrogenase	E	Bacteria	Firmicutes	Clostridia	Clostridiales	Clostridiaceae	Clostridium	Clostridium bartlettii
GFAAAXAPFVGEK	COG0334 Glutamate dehydrogenase/leucine dehydrogenase	E	Bacteria	Firmicutes	Clostridia	Clostridiales	Clostridiaceae	Clostridium	Clostridium bartlettii
XPXAXXVQVAGR	COG1614 CO dehydrogenase/acetyl-CoA synthase beta subunit	C	Bacteria	Firmicutes	Clostridia	Clostridiales	Clostridiaceae	Clostridium	Clostridium bartlettii
YGXGYNXVAGANXVGFQK	COG0334 Glutamate dehydrogenase/leucine dehydrogenase	E	Bacteria	Firmicutes	Clostridia	Clostridiales	Clostridiaceae	Clostridium
TXNVFEXAQXQVK	COG0334 Glutamate dehydrogenase/leucine dehydrogenase	E	Bacteria	Firmicutes	Clostridia	Clostridiales	Clostridiaceae	Clostridium	Clostridium bartlettii
SNEEAXEVXXEAXTK	COG0148 Enolase	G	Bacteria	Firmicutes	Clostridia	Clostridiales	Clostridiaceae	Clostridium	Clostridium sp.
GGEXXXXSGXAXK	COG2508 Regulator of polyketide synthase expression	TQ	Bacteria	Firmicutes	Clostridia	Clostridiales	Clostridiaceae	Clostridium	Clostridium acetobutylicum
HVENXTKVYK	COG2759 Formyltetrahydrofolate synthetase	F	Bacteria	Firmicutes	Clostridia	Clostridiales	Clostridiaceae	Clostridium
VTGEFAPGTYTGKPVDFYGSXAR	COG0334 Glutamate dehydrogenase/leucine dehydrogenase	E	Bacteria	Firmicutes	Clostridia	Clostridiales	Clostridiaceae	Clostridium	Clostridium bartlettii
XAXASNXEVXGVK	COG0282 Acetate kinase	C	Bacteria	Firmicutes	Clostridia	Clostridiales	Clostridiaceae	Clostridium	Clostridium bartlettii
GFAAAXAPFVGEK	COG0334 Glutamate dehydrogenase/leucine dehydrogenase	E	Bacteria	Firmicutes	Clostridia	Clostridiales	Clostridiaceae	Clostridium	Clostridium bartlettii
XPXAXXVQVAGR	COG1614 CO dehydrogenase/acetyl-CoA synthase beta subunit	C	Bacteria	Firmicutes	Clostridia	Clostridiales	Clostridiaceae	Clostridium	Clostridium bartlettii
VTEAPTRXXK	COG2884 Predicted ATPase involved in cell division	D	Bacteria	Firmicutes	Clostridia	Clostridiales	Clostridiaceae	Clostridium	Clostridium nexile
SNEEAXEVXXEAXTK	COG0148 Enolase	G	Bacteria	Firmicutes	Clostridia	Clostridiales	Clostridiaceae	Clostridium	Clostridium sp.
VTGEFAPGTYTGKPVDFYGSXAR	COG0334 Glutamate dehydrogenase/leucine dehydrogenase	E	Bacteria	Firmicutes	Clostridia	Clostridiales	Clostridiaceae	Clostridium	Clostridium bartlettii
XAXASNXEVXGVK	COG0282 Acetate kinase	C	Bacteria	Firmicutes	Clostridia	Clostridiales	Clostridiaceae	Clostridium	Clostridium bartlettii
GFAAAXAPFVGEK	COG0334 Glutamate dehydrogenase/leucine dehydrogenase	E	Bacteria	Firmicutes	Clostridia	Clostridiales	Clostridiaceae	Clostridium	Clostridium bartlettii
XPXAXXVQVAGR	COG1614 CO dehydrogenase/acetyl-CoA synthase beta subunit	C	Bacteria	Firmicutes	Clostridia	Clostridiales	Clostridiaceae	Clostridium	Clostridium bartlettii
TXNVFEXAQXQVK	COG0334 Glutamate dehydrogenase/leucine dehydrogenase	E	Bacteria	Firmicutes	Clostridia	Clostridiales	Clostridiaceae	Clostridium	Clostridium bartlettii
SNEEAXEVXXEAXTK	COG0148 Enolase	G	Bacteria	Firmicutes	Clostridia	Clostridiales	Clostridiaceae	Clostridium	Clostridium sp.
SNEEAXEVXXEAXTK	COG0148 Enolase	G	Bacteria	Firmicutes	Clostridia	Clostridiales	Clostridiaceae	Clostridium	Clostridium sp.
VXGPVRPESQVEVSXADAR	COG4869 Propanediol utilization protein	Q	Bacteria	Firmicutes	Clostridia	Clostridiales	Clostridiaceae	Clostridium	Clostridium bartlettii
SYVDEVXEXVKK	COG0334 Glutamate dehydrogenase/leucine dehydrogenase	E	Bacteria	Firmicutes	Clostridia	Clostridiales	Clostridiaceae	Clostridium	Clostridium sp.
SYVDEVXEXVKK	COG0334 Glutamate dehydrogenase/leucine dehydrogenase	E	Bacteria	Firmicutes	Clostridia	Clostridiales	Clostridiaceae	Clostridium	Clostridium sp.
GGEXXXXSGXAXK	COG2508 Regulator of polyketide synthase expression	TQ	Bacteria	Firmicutes	Clostridia	Clostridiales	Clostridiaceae	Clostridium	Clostridium acetobutylicum
XCXATXEQXGAAAXFNETPASYXK	COG0436 Aspartate/tyrosine/aromatic aminotransferase	E	Bacteria	Firmicutes	Clostridia	Clostridiales	Clostridiaceae	Clostridium	Clostridium bartlettii
HVENXTKVYK	COG2759 Formyltetrahydrofolate synthetase	F	Bacteria	Firmicutes	Clostridia	Clostridiales	Clostridiaceae	Clostridium
VXGPVRPESQVEVSXADAR	COG4869 Propanediol utilization protein	Q	Bacteria	Firmicutes	Clostridia	Clostridiales	Clostridiaceae	Clostridium	Clostridium bartlettii
VTGEFAPGTYTGKPVDFYGSXAR	COG0334 Glutamate dehydrogenase/leucine dehydrogenase	E	Bacteria	Firmicutes	Clostridia	Clostridiales	Clostridiaceae	Clostridium	Clostridium bartlettii
XAXASNXEVXGVK	COG0282 Acetate kinase	C	Bacteria	Firmicutes	Clostridia	Clostridiales	Clostridiaceae	Clostridium	Clostridium bartlettii
GGEXXXXSGXAXK	COG2508 Regulator of polyketide synthase expression	TQ	Bacteria	Firmicutes	Clostridia	Clostridiales	Clostridiaceae	Clostridium	Clostridium acetobutylicum
EGAXASXNSVAK	COG1882 Pyruvate-formate lyase	C	Bacteria	Firmicutes	Clostridia	Clostridiales	Clostridiaceae	Clostridium	Clostridium kluyveri
YGXGYNXVAGANXVGFQK	COG0334 Glutamate dehydrogenase/leucine dehydrogenase	E	Bacteria	Firmicutes	Clostridia	Clostridiales	Clostridiaceae	Clostridium
VAXYGXDYXXER	COG1882 Pyruvate-formate lyase	C	Bacteria	Firmicutes	Clostridia	Clostridiales	Clostridiaceae	Clostridium	Clostridium scindens
EGAXASXNSVAK	COG1882 Pyruvate-formate lyase	C	Bacteria	Firmicutes	Clostridia	Clostridiales	Clostridiaceae	Clostridium	Clostridium kluyveri
VAXYGXDYXXER	COG1882 Pyruvate-formate lyase	C	Bacteria	Firmicutes	Clostridia	Clostridiales	Clostridiaceae	Clostridium	Clostridium scindens
VHSGEXTNAAGEK	COG0166 Glucose-6-phosphate isomerase	G	Bacteria	Firmicutes	Clostridia	Clostridiales	Eubacteriaceae	Eubacterium	Eubacterium rectale
KVXAHETDGAXK	COG0166 Glucose-6-phosphate isomerase	G	Bacteria	Firmicutes	Clostridia	Clostridiales	Eubacteriaceae	Eubacterium	Eubacterium rectale
GASXDEVQAVAQK	COG2376 Dihydroxyacetone kinase	G	Bacteria	Firmicutes	Clostridia	Clostridiales	Eubacteriaceae	Eubacterium	Eubacterium hallii
STDXAHAXFXVVSK	COG0166 Glucose-6-phosphate isomerase	G	Bacteria	Firmicutes	Clostridia	Clostridiales	Eubacteriaceae	Eubacterium	Eubacterium hallii
STDXAHAXFXVVSK	COG0166 Glucose-6-phosphate isomerase	G	Bacteria	Firmicutes	Clostridia	Clostridiales	Eubacteriaceae	Eubacterium	Eubacterium hallii
KPXETADEXVDTXXEK	COG2376 Dihydroxyacetone kinase	G	Bacteria	Firmicutes	Clostridia	Clostridiales	Eubacteriaceae	Eubacterium	Eubacterium hallii
NXVXNASSEXXSDXK	COG0747 ABC-type dipeptide transport system, periplasmic component	E	Bacteria	Firmicutes	Clostridia	Clostridiales	Eubacteriaceae	Eubacterium	Eubacterium hallii
GXXDAXXSGDXXNAPTK	COG1866 Phosphoenolpyruvate carboxykinase (ATP)	C	Bacteria	Firmicutes	Clostridia	Clostridiales	Eubacteriaceae	Eubacterium	Eubacterium rectale
GASXDEVQAVAQK	COG2376 Dihydroxyacetone kinase	G	Bacteria	Firmicutes	Clostridia	Clostridiales	Eubacteriaceae	Eubacterium	Eubacterium hallii
XVEGXSYNNAVR	COG1904 Glucuronate isomerase	G	Bacteria	Firmicutes	Clostridia	Clostridiales	Eubacteriaceae	Eubacterium	Eubacterium eligens
TGAGPQXFACDEAVK	COG4816 Ethanolamine utilization protein	E	Bacteria	Firmicutes	Clostridia	Clostridiales	Eubacteriaceae	Eubacterium	Eubacterium hallii
XAPAWAXTYK	NO HITS		Bacteria	Firmicutes	Clostridia	Clostridiales	Eubacteriaceae	Eubacterium	Eubacterium eligens
NENYWGEAPYYDEVVXK	COG0747 ABC-type dipeptide transport system, periplasmic component	E	Bacteria	Firmicutes	Clostridia	Clostridiales	Eubacteriaceae	Eubacterium	Eubacterium hallii
STDXAHAXFXVVSK	COG0166 Glucose-6-phosphate isomerase	G	Bacteria	Firmicutes	Clostridia	Clostridiales	Eubacteriaceae	Eubacterium	Eubacterium hallii
KPXETADEXVDTXXEK	COG2376 Dihydroxyacetone kinase	G	Bacteria	Firmicutes	Clostridia	Clostridiales	Eubacteriaceae	Eubacterium	Eubacterium hallii
KPXETADEXVDTXXEK	COG2376 Dihydroxyacetone kinase	G	Bacteria	Firmicutes	Clostridia	Clostridiales	Eubacteriaceae	Eubacterium	Eubacterium hallii
TEATGYGXXYXTNAXWK	COG0334 Glutamate dehydrogenase/leucine dehydrogenase	E	Bacteria	Firmicutes	Clostridia	Clostridiales	Eubacteriaceae	Eubacterium	Eubacterium eligens
XAAAQAAXAEQAK	COG0574 Phosphoenolpyruvate synthase/pyruvate phosphate dikinase	G	Bacteria	Firmicutes	Clostridia	Clostridiales	Eubacteriaceae	Eubacterium	Eubacterium rectale
VAXXSGGGSGHEPAHGGFVGK	COG2376 Dihydroxyacetone kinase	G	Bacteria	Firmicutes	Clostridia	Clostridiales	Eubacteriaceae	Eubacterium	Eubacterium hallii
GASXDEVQAVAQK	COG2376 Dihydroxyacetone kinase	G	Bacteria	Firmicutes	Clostridia	Clostridiales	Eubacteriaceae	Eubacterium	Eubacterium hallii
AVEVAXSFVGK	COG4816 Ethanolamine utilization protein	E	Bacteria	Firmicutes	Clostridia	Clostridiales	Eubacteriaceae	Eubacterium	Eubacterium hallii
VXGXDKESEPDXYNAXR	COG1866 Phosphoenolpyruvate carboxykinase (ATP)	C	Bacteria	Firmicutes	Clostridia	Clostridiales	Eubacteriaceae	Eubacterium	Eubacterium rectale
NENYWGEAPYYDEVVXK	COG0747 ABC-type dipeptide transport system, periplasmic component	E	Bacteria	Firmicutes	Clostridia	Clostridiales	Eubacteriaceae	Eubacterium	Eubacterium hallii
KPXETADEXVDTXXEK	COG2376 Dihydroxyacetone kinase	G	Bacteria	Firmicutes	Clostridia	Clostridiales	Eubacteriaceae	Eubacterium	Eubacterium hallii
NXVXNASSEXXSDXK	COG0747 ABC-type dipeptide transport system, periplasmic component	E	Bacteria	Firmicutes	Clostridia	Clostridiales	Eubacteriaceae	Eubacterium	Eubacterium hallii
NXVXNASSEXXSDXK	COG0747 ABC-type dipeptide transport system, periplasmic component	E	Bacteria	Firmicutes	Clostridia	Clostridiales	Eubacteriaceae	Eubacterium	Eubacterium hallii
AFGXTVGAPSGXGXVXADTASK	COG4816 Ethanolamine utilization protein	E	Bacteria	Firmicutes	Clostridia	Clostridiales	Eubacteriaceae	Eubacterium	Eubacterium hallii
AFGXTVGAPSGXGXVXADTASK	COG4816 Ethanolamine utilization protein	E	Bacteria	Firmicutes	Clostridia	Clostridiales	Eubacteriaceae	Eubacterium	Eubacterium hallii
TEATGYGXXYXTNAXWK	COG0334 Glutamate dehydrogenase/leucine dehydrogenase	E	Bacteria	Firmicutes	Clostridia	Clostridiales	Eubacteriaceae	Eubacterium	Eubacterium eligens
GXXDAXXSGDXXNAPTK	COG1866 Phosphoenolpyruvate carboxykinase (ATP)	C	Bacteria	Firmicutes	Clostridia	Clostridiales	Eubacteriaceae	Eubacterium	Eubacterium rectale
ATVESXAYQTYDXXEAMQADAGVK	COG0554 Glycerol kinase	C	Bacteria	Firmicutes	Clostridia	Clostridiales	Eubacteriaceae	Eubacterium	Eubacterium hallii
XAAAQAAXAEQAK	COG0574 Phosphoenolpyruvate synthase/pyruvate phosphate dikinase	G	Bacteria	Firmicutes	Clostridia	Clostridiales	Eubacteriaceae	Eubacterium	Eubacterium rectale
TVVVDTDEGPRPGTTAESXSK	COG0183 Acetyl-CoA acetyltransferase	I	Bacteria	Firmicutes	Clostridia	Clostridiales	Eubacteriaceae	Eubacterium	Eubacterium hallii
GASXDEVQAVAQK	COG2376 Dihydroxyacetone kinase	G	Bacteria	Firmicutes	Clostridia	Clostridiales	Eubacteriaceae	Eubacterium	Eubacterium hallii
TDYVAGANXAGFEK	COG0334 Glutamate dehydrogenase/leucine dehydrogenase	E	Bacteria	Firmicutes	Clostridia	Clostridiales	Eubacteriaceae	Eubacterium
VXGXDKESEPDXYNAXR	COG1866 Phosphoenolpyruvate carboxykinase (ATP)	C	Bacteria	Firmicutes	Clostridia	Clostridiales	Eubacteriaceae	Eubacterium	Eubacterium rectale
NENYWGEAPYYDEVVXK	COG0747 ABC-type dipeptide transport system, periplasmic component	E	Bacteria	Firmicutes	Clostridia	Clostridiales	Eubacteriaceae	Eubacterium	Eubacterium hallii
KPXETADEXVDTXXEK	COG2376 Dihydroxyacetone kinase	G	Bacteria	Firmicutes	Clostridia	Clostridiales	Eubacteriaceae	Eubacterium	Eubacterium hallii
NXVXNASSEXXSDXK	COG0747 ABC-type dipeptide transport system, periplasmic component	E	Bacteria	Firmicutes	Clostridia	Clostridiales	Eubacteriaceae	Eubacterium	Eubacterium hallii
ANAXXDEAGWVMNESTGXR	COG0747 ABC-type dipeptide transport system, periplasmic component	E	Bacteria	Firmicutes	Clostridia	Clostridiales	Eubacteriaceae	Eubacterium	Eubacterium hallii
TEATGYGXXYXTNAXWK	COG0334 Glutamate dehydrogenase/leucine dehydrogenase	E	Bacteria	Firmicutes	Clostridia	Clostridiales	Eubacteriaceae	Eubacterium	Eubacterium eligens
GXXDAXXSGDXXNAPTK	COG1866 Phosphoenolpyruvate carboxykinase (ATP)	C	Bacteria	Firmicutes	Clostridia	Clostridiales	Eubacteriaceae	Eubacterium	Eubacterium rectale
XAAAQAAXAEQAK	COG0574 Phosphoenolpyruvate synthase/pyruvate phosphate dikinase	G	Bacteria	Firmicutes	Clostridia	Clostridiales	Eubacteriaceae	Eubacterium	Eubacterium rectale
VAXXSGGGSGHEPAHGGFVGK	COG2376 Dihydroxyacetone kinase	G	Bacteria	Firmicutes	Clostridia	Clostridiales	Eubacteriaceae	Eubacterium	Eubacterium hallii
TVVVDTDEGPRPGTTAESXSK	COG0183 Acetyl-CoA acetyltransferase	I	Bacteria	Firmicutes	Clostridia	Clostridiales	Eubacteriaceae	Eubacterium	Eubacterium hallii
GASXDEVQAVAQK	COG2376 Dihydroxyacetone kinase	G	Bacteria	Firmicutes	Clostridia	Clostridiales	Eubacteriaceae	Eubacterium	Eubacterium hallii
TGAGPQXFACDEAVK	COG4816 Ethanolamine utilization protein	E	Bacteria	Firmicutes	Clostridia	Clostridiales	Eubacteriaceae	Eubacterium	Eubacterium hallii
AVEVAXSFVGK	COG4816 Ethanolamine utilization protein	E	Bacteria	Firmicutes	Clostridia	Clostridiales	Eubacteriaceae	Eubacterium	Eubacterium hallii
VXGXDKESEPDXYNAXR	COG1866 Phosphoenolpyruvate carboxykinase (ATP)	C	Bacteria	Firmicutes	Clostridia	Clostridiales	Eubacteriaceae	Eubacterium	Eubacterium rectale
NENYWGEAPYYDEVVXK	COG0747 ABC-type dipeptide transport system, periplasmic component	E	Bacteria	Firmicutes	Clostridia	Clostridiales	Eubacteriaceae	Eubacterium	Eubacterium hallii
NXVXNASSEXXSDXK	COG0747 ABC-type dipeptide transport system, periplasmic component	E	Bacteria	Firmicutes	Clostridia	Clostridiales	Eubacteriaceae	Eubacterium	Eubacterium hallii
XXTXDPVDXEFYDVK	NO HITS		Bacteria	Firmicutes	Clostridia	Clostridiales	Eubacteriaceae	Eubacterium	Eubacterium rectale
VGXAAQAXGXAEGAXEETTK	COG1960 Acyl-CoA dehydrogenases	I	Bacteria	Firmicutes	Clostridia	Clostridiales	Eubacteriaceae	Eubacterium	Eubacterium hallii
TEATGYGXXYXTNAXWK	COG0334 Glutamate dehydrogenase/leucine dehydrogenase	E	Bacteria	Firmicutes	Clostridia	Clostridiales	Eubacteriaceae	Eubacterium	Eubacterium eligens
GXXDAXXSGDXXNAPTK	COG1866 Phosphoenolpyruvate carboxykinase (ATP)	C	Bacteria	Firmicutes	Clostridia	Clostridiales	Eubacteriaceae	Eubacterium	Eubacterium rectale
XAAAQAAXAEQAK	COG0574 Phosphoenolpyruvate synthase/pyruvate phosphate dikinase	G	Bacteria	Firmicutes	Clostridia	Clostridiales	Eubacteriaceae	Eubacterium	Eubacterium rectale
TVVVDTDEGPRPGTTAESXSK	COG0183 Acetyl-CoA acetyltransferase	I	Bacteria	Firmicutes	Clostridia	Clostridiales	Eubacteriaceae	Eubacterium	Eubacterium hallii
GASXDEVQAVAQK	COG2376 Dihydroxyacetone kinase	G	Bacteria	Firmicutes	Clostridia	Clostridiales	Eubacteriaceae	Eubacterium	Eubacterium hallii
DTYADASEWEAK	COG1866 Phosphoenolpyruvate carboxykinase (ATP)	C	Bacteria	Firmicutes	Clostridia	Clostridiales	Eubacteriaceae	Eubacterium
VXGXDKESEPDXYNAXR	COG1866 Phosphoenolpyruvate carboxykinase (ATP)	C	Bacteria	Firmicutes	Clostridia	Clostridiales	Eubacteriaceae	Eubacterium	Eubacterium rectale
NENYWGEAPYYDEVVXK	COG0747 ABC-type dipeptide transport system, periplasmic component	E	Bacteria	Firmicutes	Clostridia	Clostridiales	Eubacteriaceae	Eubacterium	Eubacterium hallii
KPXETADEXVDTXXEK	COG2376 Dihydroxyacetone kinase	G	Bacteria	Firmicutes	Clostridia	Clostridiales	Eubacteriaceae	Eubacterium	Eubacterium hallii
NXVXNASSEXXSDXK	COG0747 ABC-type dipeptide transport system, periplasmic component	E	Bacteria	Firmicutes	Clostridia	Clostridiales	Eubacteriaceae	Eubacterium	Eubacterium hallii
AFGXTVGAPSGXGXVXADTASK	COG4816 Ethanolamine utilization protein	E	Bacteria	Firmicutes	Clostridia	Clostridiales	Eubacteriaceae	Eubacterium	Eubacterium hallii
ANAXXDEAGWVMNESTGXR	COG0747 ABC-type dipeptide transport system, periplasmic component	E	Bacteria	Firmicutes	Clostridia	Clostridiales	Eubacteriaceae	Eubacterium	Eubacterium hallii
XXTXDPVDXEFYDVK	NO HITS		Bacteria	Firmicutes	Clostridia	Clostridiales	Eubacteriaceae	Eubacterium	Eubacterium rectale
TEATGYGXXYXTNAXWK	COG0334 Glutamate dehydrogenase/leucine dehydrogenase	E	Bacteria	Firmicutes	Clostridia	Clostridiales	Eubacteriaceae	Eubacterium	Eubacterium eligens
GXXDAXXSGDXXNAPTK	COG1866 Phosphoenolpyruvate carboxykinase (ATP)	C	Bacteria	Firmicutes	Clostridia	Clostridiales	Eubacteriaceae	Eubacterium	Eubacterium rectale
NNXXAQAGQSMXAQANQSNQGVXSXXQ	COG1344 Flagellin and related hook-associated proteins	N	Bacteria	Firmicutes	Clostridia	Clostridiales	Eubacteriaceae	Eubacterium	Eubacterium rectale
XAAAQAAXAEQAK	COG0574 Phosphoenolpyruvate synthase/pyruvate phosphate dikinase	G	Bacteria	Firmicutes	Clostridia	Clostridiales	Eubacteriaceae	Eubacterium	Eubacterium rectale
TVVVDTDEGPRPGTTAESXSK	COG0183 Acetyl-CoA acetyltransferase	I	Bacteria	Firmicutes	Clostridia	Clostridiales	Eubacteriaceae	Eubacterium	Eubacterium hallii
GASXDEVQAVAQK	COG2376 Dihydroxyacetone kinase	G	Bacteria	Firmicutes	Clostridia	Clostridiales	Eubacteriaceae	Eubacterium	Eubacterium hallii
TDYVAGANXAGFEK	COG0334 Glutamate dehydrogenase/leucine dehydrogenase	E	Bacteria	Firmicutes	Clostridia	Clostridiales	Eubacteriaceae	Eubacterium
AVEVAXSFVGK	COG4816 Ethanolamine utilization protein	E	Bacteria	Firmicutes	Clostridia	Clostridiales	Eubacteriaceae	Eubacterium	Eubacterium hallii
VXGXDKESEPDXYNAXR	COG1866 Phosphoenolpyruvate carboxykinase (ATP)	C	Bacteria	Firmicutes	Clostridia	Clostridiales	Eubacteriaceae	Eubacterium	Eubacterium rectale
NENYWGEAPYYDEVVXK	COG0747 ABC-type dipeptide transport system, periplasmic component	E	Bacteria	Firmicutes	Clostridia	Clostridiales	Eubacteriaceae	Eubacterium	Eubacterium hallii
XDDQMKEXXDEEADTPAXTVAK	COG2376 Dihydroxyacetone kinase	G	Bacteria	Firmicutes	Clostridia	Clostridiales	Eubacteriaceae	Eubacterium	Eubacterium hallii
KPXETADEXVDTXXEK	COG2376 Dihydroxyacetone kinase	G	Bacteria	Firmicutes	Clostridia	Clostridiales	Eubacteriaceae	Eubacterium	Eubacterium hallii
KPXETADEXVDTXXEK	COG2376 Dihydroxyacetone kinase	G	Bacteria	Firmicutes	Clostridia	Clostridiales	Eubacteriaceae	Eubacterium	Eubacterium hallii
NXVXNASSEXXSDXK	COG0747 ABC-type dipeptide transport system, periplasmic component	E	Bacteria	Firmicutes	Clostridia	Clostridiales	Eubacteriaceae	Eubacterium	Eubacterium hallii
GMXDAAVAGAVFTSPTPDQXYEGXK	COG2376 Dihydroxyacetone kinase	G	Bacteria	Firmicutes	Clostridia	Clostridiales	Eubacteriaceae	Eubacterium	Eubacterium hallii
TNVPADQVDEVXMGCVXQAGXGQNVAR	COG0183 Acetyl-CoA acetyltransferase	I	Bacteria	Firmicutes	Clostridia	Clostridiales	Eubacteriaceae	Eubacterium	Eubacterium hallii
TEATGYGXXYXTNAXWK	COG0334 Glutamate dehydrogenase/leucine dehydrogenase	E	Bacteria	Firmicutes	Clostridia	Clostridiales	Eubacteriaceae	Eubacterium	Eubacterium eligens
XAAAQAAXAEQAK	COG0574 Phosphoenolpyruvate synthase/pyruvate phosphate dikinase	G	Bacteria	Firmicutes	Clostridia	Clostridiales	Eubacteriaceae	Eubacterium	Eubacterium rectale
XAAAQAAXAEQAK	COG0574 Phosphoenolpyruvate synthase/pyruvate phosphate dikinase	G	Bacteria	Firmicutes	Clostridia	Clostridiales	Eubacteriaceae	Eubacterium	Eubacterium rectale
VAXXSGGGSGHEPAHGGFVGK	COG2376 Dihydroxyacetone kinase	G	Bacteria	Firmicutes	Clostridia	Clostridiales	Eubacteriaceae	Eubacterium	Eubacterium hallii
TVVVDTDEGPRPGTTAESXSK	COG0183 Acetyl-CoA acetyltransferase	I	Bacteria	Firmicutes	Clostridia	Clostridiales	Eubacteriaceae	Eubacterium	Eubacterium hallii
GASXDEVQAVAQK	COG2376 Dihydroxyacetone kinase	G	Bacteria	Firmicutes	Clostridia	Clostridiales	Eubacteriaceae	Eubacterium	Eubacterium hallii
TDYVAGANXAGFEK	COG0334 Glutamate dehydrogenase/leucine dehydrogenase	E	Bacteria	Firmicutes	Clostridia	Clostridiales	Eubacteriaceae	Eubacterium
XYEAXEGCPVTXR	COG0574 Phosphoenolpyruvate synthase/pyruvate phosphate dikinase	G	Bacteria	Firmicutes	Clostridia	Clostridiales	Eubacteriaceae	Eubacterium	Eubacterium rectale
NENYWGEAPYYDEVVXK	COG0747 ABC-type dipeptide transport system, periplasmic component	E	Bacteria	Firmicutes	Clostridia	Clostridiales	Eubacteriaceae	Eubacterium	Eubacterium hallii
KPXETADEXVDTXXEK	COG2376 Dihydroxyacetone kinase	G	Bacteria	Firmicutes	Clostridia	Clostridiales	Eubacteriaceae	Eubacterium	Eubacterium hallii
SYVDEVXAVVQK	COG0334 Glutamate dehydrogenase/leucine dehydrogenase	E	Bacteria	Firmicutes	Clostridia	Clostridiales	Eubacteriaceae	Eubacterium	Eubacterium rectale
VGXAAQAXGXAEGAXEETTK	COG1960 Acyl-CoA dehydrogenases	I	Bacteria	Firmicutes	Clostridia	Clostridiales	Eubacteriaceae	Eubacterium	Eubacterium hallii
GXXDAXXSGDXXNAPTK	COG1866 Phosphoenolpyruvate carboxykinase (ATP)	C	Bacteria	Firmicutes	Clostridia	Clostridiales	Eubacteriaceae	Eubacterium	Eubacterium rectale
XAAAQAAXAEQAK	COG0574 Phosphoenolpyruvate synthase/pyruvate phosphate dikinase	G	Bacteria	Firmicutes	Clostridia	Clostridiales	Eubacteriaceae	Eubacterium	Eubacterium rectale
XVEVXAGVNTPVETVDAXKK	COG1250 3-hydroxyacyl-CoA dehydrogenase	I	Bacteria	Firmicutes	Clostridia	Clostridiales	Eubacteriaceae	Eubacterium	Eubacterium rectale
XDDXSQPGXEXXR	COG0176 Transaldolase	G	Bacteria	Firmicutes	Clostridia	Clostridiales	Eubacteriaceae	Eubacterium	Eubacterium rectale
VADKXNVXDNXXEK	COG0126 3-phosphoglycerate kinase	G	Bacteria	Firmicutes	Clostridia	Clostridiales	Eubacteriaceae	Eubacterium	Eubacterium rectale
AVENPVRPFVAXXGGAK	COG0126 3-phosphoglycerate kinase	G	Bacteria	Firmicutes	Clostridia	Clostridiales	Eubacteriaceae	Eubacterium	Eubacterium rectale
KPXETADEXVDTXXEK	COG2376 Dihydroxyacetone kinase	G	Bacteria	Firmicutes	Clostridia	Clostridiales	Eubacteriaceae	Eubacterium	Eubacterium hallii
VGXAAQAXGXAEGAXEETTK	COG1960 Acyl-CoA dehydrogenases	I	Bacteria	Firmicutes	Clostridia	Clostridiales	Eubacteriaceae	Eubacterium	Eubacterium hallii
DXASXADVFVNDAFGTAHR	COG0126 3-phosphoglycerate kinase	G	Bacteria	Firmicutes	Clostridia	Clostridiales	Eubacteriaceae	Eubacterium	Eubacterium eligens
GXXDAXXSGDXXNAPTK	COG1866 Phosphoenolpyruvate carboxykinase (ATP)	C	Bacteria	Firmicutes	Clostridia	Clostridiales	Eubacteriaceae	Eubacterium	Eubacterium rectale
ATVESXAYQTYDXXEAMQADAGVK	COG0554 Glycerol kinase	C	Bacteria	Firmicutes	Clostridia	Clostridiales	Eubacteriaceae	Eubacterium	Eubacterium hallii
XAAAQAAXAEQAK	COG0574 Phosphoenolpyruvate synthase/pyruvate phosphate dikinase	G	Bacteria	Firmicutes	Clostridia	Clostridiales	Eubacteriaceae	Eubacterium	Eubacterium rectale
XNXVSEHAYSDGXR	NO COG		Bacteria	Firmicutes	Clostridia	Clostridiales	Eubacteriaceae	Eubacterium	Eubacterium rectale
XYEAXEGCPVTXR	COG0574 Phosphoenolpyruvate synthase/pyruvate phosphate dikinase	G	Bacteria	Firmicutes	Clostridia	Clostridiales	Eubacteriaceae	Eubacterium	Eubacterium rectale
VXGXDKESEPDXYNAXR	COG1866 Phosphoenolpyruvate carboxykinase (ATP)	C	Bacteria	Firmicutes	Clostridia	Clostridiales	Eubacteriaceae	Eubacterium	Eubacterium rectale
XVEVXAGVNTPVETVDAXKK	COG1250 3-hydroxyacyl-CoA dehydrogenase	I	Bacteria	Firmicutes	Clostridia	Clostridiales	Eubacteriaceae	Eubacterium	Eubacterium rectale
XKPGSTXXEPTSGNTGXGXAAXAAAK	COG0031 Cysteine synthase	E	Bacteria	Firmicutes	Clostridia	Clostridiales	Eubacteriaceae	Eubacterium	Eubacterium rectale
XDDXSQPGXEXXR	COG0176 Transaldolase	G	Bacteria	Firmicutes	Clostridia	Clostridiales	Eubacteriaceae	Eubacterium	Eubacterium rectale
VADKXNVXDNXXEK	COG0126 3-phosphoglycerate kinase	G	Bacteria	Firmicutes	Clostridia	Clostridiales	Eubacteriaceae	Eubacterium	Eubacterium rectale
AVENPVRPFVAXXGGAK	COG0126 3-phosphoglycerate kinase	G	Bacteria	Firmicutes	Clostridia	Clostridiales	Eubacteriaceae	Eubacterium	Eubacterium rectale
SFGSXGVFAXK	COG2407 L-fucose isomerase and related proteins	G	Bacteria	Firmicutes	Clostridia	Clostridiales	Eubacteriaceae	Eubacterium	Eubacterium rectale
TTXTAAXTAVXAAR	COG0050 GTPases - translation elongation factors	J	Bacteria	Firmicutes	Clostridia	Clostridiales	Eubacteriaceae	Eubacterium	Eubacterium rectale
VGXAAQAXGXAEGAXEETTK	COG1960 Acyl-CoA dehydrogenases	I	Bacteria	Firmicutes	Clostridia	Clostridiales	Eubacteriaceae	Eubacterium	Eubacterium hallii
TEATGYGXXYXTNAXWK	COG0334 Glutamate dehydrogenase/leucine dehydrogenase	E	Bacteria	Firmicutes	Clostridia	Clostridiales	Eubacteriaceae	Eubacterium	Eubacterium eligens
ATVESXAYQTYDXXEAMQADAGVK	COG0554 Glycerol kinase	C	Bacteria	Firmicutes	Clostridia	Clostridiales	Eubacteriaceae	Eubacterium	Eubacterium hallii
GASXDEVQAVAQK	COG2376 Dihydroxyacetone kinase	G	Bacteria	Firmicutes	Clostridia	Clostridiales	Eubacteriaceae	Eubacterium	Eubacterium hallii
XDDQMKEXXDEEADTPAXTVAK	COG2376 Dihydroxyacetone kinase	G	Bacteria	Firmicutes	Clostridia	Clostridiales	Eubacteriaceae	Eubacterium	Eubacterium hallii
TDXTYPVSFGGFTVQSR	COG0058 Glucan phosphorylase	G	Bacteria	Firmicutes	Clostridia	Clostridiales	Eubacteriaceae	Eubacterium	Eubacterium rectale
KPXETADEXVDTXXEK	COG2376 Dihydroxyacetone kinase	G	Bacteria	Firmicutes	Clostridia	Clostridiales	Eubacteriaceae	Eubacterium	Eubacterium hallii
TGXSXDDFDXXEANEAFAAQSXAVAR	COG0183 Acetyl-CoA acetyltransferase	I	Bacteria	Firmicutes	Clostridia	Clostridiales	Eubacteriaceae	Eubacterium	Eubacterium rectale
NRTGXVXEXK	NO COG		Bacteria	Firmicutes	Clostridia	Clostridiales	Eubacteriaceae	Eubacterium	Eubacterium rectale
XYDXDVVGYNNR	COG0058 Glucan phosphorylase	G	Bacteria	Firmicutes	Clostridia	Clostridiales	Eubacteriaceae	Eubacterium	Eubacterium rectale
TDXTYPVSFGGFTVQSR	COG0058 Glucan phosphorylase	G	Bacteria	Firmicutes	Clostridia	Clostridiales	Eubacteriaceae	Eubacterium	Eubacterium rectale
GXXDAXXSGDXK	COG1866 Phosphoenolpyruvate carboxykinase (ATP)	C	Bacteria	Firmicutes	Clostridia	Clostridiales	Lachnospiraceae	Butyrivibrio	Butyrivibrio fibrisolvens
GXXDAXXSGDXK	COG1866 Phosphoenolpyruvate carboxykinase (ATP)	C	Bacteria	Firmicutes	Clostridia	Clostridiales	Lachnospiraceae	Butyrivibrio	Butyrivibrio fibrisolvens
GXTQASSNAQDGXSAVQTAEGAXNEVQDMXQR	COG1344 Flagellin and related hook-associated proteins	N	Bacteria	Firmicutes	Clostridia	Clostridiales	Lachnospiraceae	Butyrivibrio	Butyrivibrio crossotus
GXXDAXXSGDXK	COG1866 Phosphoenolpyruvate carboxykinase (ATP)	C	Bacteria	Firmicutes	Clostridia	Clostridiales	Lachnospiraceae	Butyrivibrio	Butyrivibrio fibrisolvens
GXXDAXXSGDXK	COG1866 Phosphoenolpyruvate carboxykinase (ATP)	C	Bacteria	Firmicutes	Clostridia	Clostridiales	Lachnospiraceae	Butyrivibrio	Butyrivibrio fibrisolvens
GXTQASSNAQDGXSAVQTAEGAXNEVQDMXQR	COG1344 Flagellin and related hook-associated proteins	N	Bacteria	Firmicutes	Clostridia	Clostridiales	Lachnospiraceae	Butyrivibrio	Butyrivibrio crossotus
GXXDAXXSGDXK	COG1866 Phosphoenolpyruvate carboxykinase (ATP)	C	Bacteria	Firmicutes	Clostridia	Clostridiales	Lachnospiraceae	Butyrivibrio	Butyrivibrio fibrisolvens
GXTQASSNAQDGXSAVQTAEGAXNEVQDMXQR	COG1344 Flagellin and related hook-associated proteins	N	Bacteria	Firmicutes	Clostridia	Clostridiales	Lachnospiraceae	Butyrivibrio	Butyrivibrio crossotus
VTDVTGGAGXDAK	NO HITS		Bacteria	Firmicutes	Clostridia	Clostridiales	Lachnospiraceae	Butyrivibrio	Butyrivibrio crossotus
AADAAAAXGEGXQSFCXPGSVADTRK	NO COG		Bacteria	Firmicutes	Clostridia	Clostridiales	Lachnospiraceae	Butyrivibrio	Butyrivibrio crossotus
DXEQXVGXQTDEPXKR	COG1882 Pyruvate-formate lyase	C	Bacteria	Firmicutes	Clostridia	Clostridiales	Lachnospiraceae	Coprococcus	Coprococcus eutactus
GXGXVXANPEFADXR	COG1454 Alcohol dehydrogenase, class IV	C	Bacteria	Firmicutes	Clostridia	Clostridiales	Lachnospiraceae	Coprococcus	Coprococcus eutactus
XXYDFXDSSEXFK	COG1932 Phosphoserine aminotransferase	HE	Bacteria	Firmicutes	Clostridia	Clostridiales	Lachnospiraceae	Coprococcus
TPEEFXAAXK	COG1653 ABC-type sugar transport system, periplasmic component	G	Bacteria	Firmicutes	Clostridia	Clostridiales	Lachnospiraceae	Coprococcus
VXNXYAWNEEFK	NO HITS		Bacteria	Firmicutes	Clostridia	Clostridiales	Lachnospiraceae	Coprococcus	Coprococcus eutactus
XXYDFXDSSEXFK	COG1932 Phosphoserine aminotransferase	HE	Bacteria	Firmicutes	Clostridia	Clostridiales	Lachnospiraceae	Coprococcus
XXTXDPVDXEFYDXTVK	NO HITS		Bacteria	Firmicutes	Clostridia	Clostridiales	Lachnospiraceae	Coprococcus
TVDAQXAGTFGR	COG0574 Phosphoenolpyruvate synthase/pyruvate phosphate dikinase	G	Bacteria	Firmicutes	Clostridia	Clostridiales	Lachnospiraceae	Coprococcus
WVEDGKXNXDPQFK	NO HITS		Bacteria	Firmicutes	Clostridia	Clostridiales	Lachnospiraceae	Coprococcus	Coprococcus eutactus
DXEQXVGXQTDEPXKR	COG1882 Pyruvate-formate lyase	C	Bacteria	Firmicutes	Clostridia	Clostridiales	Lachnospiraceae	Coprococcus	Coprococcus eutactus
VXNXYAWNEEFK	NO HITS		Bacteria	Firmicutes	Clostridia	Clostridiales	Lachnospiraceae	Coprococcus	Coprococcus eutactus
GXGXVXANPEFADXR	COG1454 Alcohol dehydrogenase, class IV	C	Bacteria	Firmicutes	Clostridia	Clostridiales	Lachnospiraceae	Coprococcus	Coprococcus eutactus
XXTXDPVDXEFYDXTVK	NO HITS		Bacteria	Firmicutes	Clostridia	Clostridiales	Lachnospiraceae	Coprococcus
XGXAAQAXGXAEGAXETTVNYVK	COG1960 Acyl-CoA dehydrogenases	I	Bacteria	Firmicutes	Clostridia	Clostridiales	Lachnospiraceae	Coprococcus	Coprococcus eutactus
TVDAQXAGTFGR	COG0574 Phosphoenolpyruvate synthase/pyruvate phosphate dikinase	G	Bacteria	Firmicutes	Clostridia	Clostridiales	Lachnospiraceae	Coprococcus
WVEDGKXNXDPQFK	NO HITS		Bacteria	Firmicutes	Clostridia	Clostridiales	Lachnospiraceae	Coprococcus	Coprococcus eutactus
MXQNQEWESFTGR	COG1882 Pyruvate-formate lyase	C	Bacteria	Firmicutes	Clostridia	Clostridiales	Lachnospiraceae	Coprococcus	Coprococcus eutactus
DXEQXVGXQTDEPXKR	COG1882 Pyruvate-formate lyase	C	Bacteria	Firmicutes	Clostridia	Clostridiales	Lachnospiraceae	Coprococcus	Coprococcus eutactus
VXNXYAWNEEFK	NO HITS		Bacteria	Firmicutes	Clostridia	Clostridiales	Lachnospiraceae	Coprococcus	Coprococcus eutactus
GXGXVXANPEFADXR	COG1454 Alcohol dehydrogenase, class IV	C	Bacteria	Firmicutes	Clostridia	Clostridiales	Lachnospiraceae	Coprococcus	Coprococcus eutactus
XAXXXAYXR	COG1454 Alcohol dehydrogenase, class IV	C	Bacteria	Firmicutes	Clostridia	Clostridiales	Lachnospiraceae	Coprococcus	Coprococcus eutactus
XGXAAQAXGXAEGAXETTVNYVK	COG1960 Acyl-CoA dehydrogenases	I	Bacteria	Firmicutes	Clostridia	Clostridiales	Lachnospiraceae	Coprococcus	Coprococcus eutactus
SXPXFAVPTTAGTAAEVTXNYVXTDVEK	COG1454 Alcohol dehydrogenase, class IV	C	Bacteria	Firmicutes	Clostridia	Clostridiales	Lachnospiraceae	Coprococcus	Coprococcus eutactus
TVDAQXAGTFGR	COG0574 Phosphoenolpyruvate synthase/pyruvate phosphate dikinase	G	Bacteria	Firmicutes	Clostridia	Clostridiales	Lachnospiraceae	Coprococcus
WVEDGKXNXDPQFK	NO HITS		Bacteria	Firmicutes	Clostridia	Clostridiales	Lachnospiraceae	Coprococcus	Coprococcus eutactus
DXEQXVGXQTDEPXKR	COG1882 Pyruvate-formate lyase	C	Bacteria	Firmicutes	Clostridia	Clostridiales	Lachnospiraceae	Coprococcus	Coprococcus eutactus
VXNXYAWNEEFK	NO HITS		Bacteria	Firmicutes	Clostridia	Clostridiales	Lachnospiraceae	Coprococcus	Coprococcus eutactus
GXGXVXANPEFADXR	COG1454 Alcohol dehydrogenase, class IV	C	Bacteria	Firmicutes	Clostridia	Clostridiales	Lachnospiraceae	Coprococcus	Coprococcus eutactus
SYVDEVXEXVQK	COG0334 Glutamate dehydrogenase/leucine dehydrogenase	E	Bacteria	Firmicutes	Clostridia	Clostridiales	Lachnospiraceae	Coprococcus
SXPXFAVPTTAGTAAEVTXNYVXTDVEK	COG1454 Alcohol dehydrogenase, class IV	C	Bacteria	Firmicutes	Clostridia	Clostridiales	Lachnospiraceae	Coprococcus	Coprococcus eutactus
TVDAQXAGTFGR	COG0574 Phosphoenolpyruvate synthase/pyruvate phosphate dikinase	G	Bacteria	Firmicutes	Clostridia	Clostridiales	Lachnospiraceae	Coprococcus
WVEDGKXNXDPQFK	NO HITS		Bacteria	Firmicutes	Clostridia	Clostridiales	Lachnospiraceae	Coprococcus	Coprococcus eutactus
XDXSNXSAYDQGCNESFQK	NO HITS		Bacteria	Firmicutes	Clostridia	Clostridiales	Lachnospiraceae	Coprococcus	Coprococcus eutactus
DXEQXVGXQTDEPXKR	COG1882 Pyruvate-formate lyase	C	Bacteria	Firmicutes	Clostridia	Clostridiales	Lachnospiraceae	Coprococcus	Coprococcus eutactus
VXNXYAWNEEFK	NO HITS		Bacteria	Firmicutes	Clostridia	Clostridiales	Lachnospiraceae	Coprococcus	Coprococcus eutactus
GXGXVXANPEFADXR	COG1454 Alcohol dehydrogenase, class IV	C	Bacteria	Firmicutes	Clostridia	Clostridiales	Lachnospiraceae	Coprococcus	Coprococcus eutactus
SYVDEVXEXVQK	COG0334 Glutamate dehydrogenase/leucine dehydrogenase	E	Bacteria	Firmicutes	Clostridia	Clostridiales	Lachnospiraceae	Coprococcus
XGXAAQAXGXAEGAXETTVNYVK	COG1960 Acyl-CoA dehydrogenases	I	Bacteria	Firmicutes	Clostridia	Clostridiales	Lachnospiraceae	Coprococcus	Coprococcus eutactus
TVDAQXAGTFGR	COG0574 Phosphoenolpyruvate synthase/pyruvate phosphate dikinase	G	Bacteria	Firmicutes	Clostridia	Clostridiales	Lachnospiraceae	Coprococcus
WVEDGKXNXDPQFK	NO HITS		Bacteria	Firmicutes	Clostridia	Clostridiales	Lachnospiraceae	Coprococcus	Coprococcus eutactus
WVEDGKXNXDPQFK	NO HITS		Bacteria	Firmicutes	Clostridia	Clostridiales	Lachnospiraceae	Coprococcus	Coprococcus eutactus
XDXSNXSAYDQGCNESFQK	NO HITS		Bacteria	Firmicutes	Clostridia	Clostridiales	Lachnospiraceae	Coprococcus	Coprococcus eutactus
DXEQXVGXQTDEPXKR	COG1882 Pyruvate-formate lyase	C	Bacteria	Firmicutes	Clostridia	Clostridiales	Lachnospiraceae	Coprococcus	Coprococcus eutactus
VXNXYAWNEEFK	NO HITS		Bacteria	Firmicutes	Clostridia	Clostridiales	Lachnospiraceae	Coprococcus	Coprococcus eutactus
GXGXVXANPEFADXR	COG1454 Alcohol dehydrogenase, class IV	C	Bacteria	Firmicutes	Clostridia	Clostridiales	Lachnospiraceae	Coprococcus	Coprococcus eutactus
FVXNETSYHGAGAXAEXATEAXGR	COG1454 Alcohol dehydrogenase, class IV	C	Bacteria	Firmicutes	Clostridia	Clostridiales	Lachnospiraceae	Coprococcus	Coprococcus eutactus
SYVDEVXEXVQK	COG0334 Glutamate dehydrogenase/leucine dehydrogenase	E	Bacteria	Firmicutes	Clostridia	Clostridiales	Lachnospiraceae	Coprococcus
KXPMFDFEVPTEXPGVDPAXXDPR	COG1866 Phosphoenolpyruvate carboxykinase (ATP)	C	Bacteria	Firmicutes	Clostridia	Clostridiales	Lachnospiraceae	Coprococcus
XGXAAQAXGXAEGAXETTVNYVK	COG1960 Acyl-CoA dehydrogenases	I	Bacteria	Firmicutes	Clostridia	Clostridiales	Lachnospiraceae	Coprococcus	Coprococcus eutactus
TVDAQXAGTFGR	COG0574 Phosphoenolpyruvate synthase/pyruvate phosphate dikinase	G	Bacteria	Firmicutes	Clostridia	Clostridiales	Lachnospiraceae	Coprococcus
WVEDGKXNXDPQFK	NO HITS		Bacteria	Firmicutes	Clostridia	Clostridiales	Lachnospiraceae	Coprococcus	Coprococcus eutactus
DXEQXVGXQTDEPXKR	COG1882 Pyruvate-formate lyase	C	Bacteria	Firmicutes	Clostridia	Clostridiales	Lachnospiraceae	Coprococcus	Coprococcus eutactus
VXNXYAWNEEFK	NO HITS		Bacteria	Firmicutes	Clostridia	Clostridiales	Lachnospiraceae	Coprococcus	Coprococcus eutactus
GXGXVXANPEFADXR	COG1454 Alcohol dehydrogenase, class IV	C	Bacteria	Firmicutes	Clostridia	Clostridiales	Lachnospiraceae	Coprococcus	Coprococcus eutactus
SXPXFAVPTTAGTAAEVTXNYVXTDVEK	COG1454 Alcohol dehydrogenase, class IV	C	Bacteria	Firmicutes	Clostridia	Clostridiales	Lachnospiraceae	Coprococcus	Coprococcus eutactus
STDVQNADSXR	NO HITS		Bacteria	Firmicutes	Clostridia	Clostridiales	Lachnospiraceae	Coprococcus	Coprococcus eutactus
TFGFVVDQATNQVK	NO HITS		Bacteria	Firmicutes	Clostridia	Clostridiales	Lachnospiraceae	Coprococcus	Coprococcus eutactus
XAXXXAYXR	COG1454 Alcohol dehydrogenase, class IV	C	Bacteria	Firmicutes	Clostridia	Clostridiales	Lachnospiraceae	Coprococcus	Coprococcus eutactus
NNVFNSXVEFFAK	COG0078 Ornithine carbamoyltransferase	E	Bacteria	Firmicutes	Clostridia	Clostridiales	Lachnospiraceae	Coprococcus
XGXAAQAXGXAEGAXETTVNYVK	COG1960 Acyl-CoA dehydrogenases	I	Bacteria	Firmicutes	Clostridia	Clostridiales	Lachnospiraceae	Coprococcus	Coprococcus eutactus
STDVQNADSXR	NO HITS		Bacteria	Firmicutes	Clostridia	Clostridiales	Lachnospiraceae	Coprococcus	Coprococcus eutactus
TFGFVVDQATNQVK	NO HITS		Bacteria	Firmicutes	Clostridia	Clostridiales	Lachnospiraceae	Coprococcus	Coprococcus eutactus
SYVDEVXEXVQKK	COG0334 Glutamate dehydrogenase/leucine dehydrogenase	E	Bacteria	Firmicutes	Clostridia	Clostridiales	Lachnospiraceae	Coprococcus
SYVDEVXEXVQK	COG0334 Glutamate dehydrogenase/leucine dehydrogenase	E	Bacteria	Firmicutes	Clostridia	Clostridiales	Lachnospiraceae	Coprococcus
GVGTVXXGXFDDAK	COG0778 Nitroreductase	C	Bacteria	Firmicutes	Clostridia	Clostridiales	Lachnospiraceae	Coprococcus
TXPXXXAXXR	COG0395 ABC-type sugar transport system, permease component	G	Bacteria	Firmicutes	Clostridia	Clostridiales	Lachnospiraceae	Coprococcus	Coprococcus eutactus
XGXAAQAXGXAEGAXETTVNYVK	COG1960 Acyl-CoA dehydrogenases	I	Bacteria	Firmicutes	Clostridia	Clostridiales	Lachnospiraceae	Coprococcus	Coprococcus eutactus
XNTQHGXVXNNPAFTK	COG3459 Cellobiose phosphorylase	G	Bacteria	Firmicutes	Clostridia	Clostridiales	Lachnospiraceae	Coprococcus
XXGXXNVNTPDDKVNR	COG3459 Cellobiose phosphorylase	G	Bacteria	Firmicutes	Clostridia	Clostridiales	Lachnospiraceae	Coprococcus	Coprococcus eutactus
DTVQDXQGVXHXAPEMAXEK	COG3459 Cellobiose phosphorylase	G	Bacteria	Firmicutes	Clostridia	Clostridiales	Lachnospiraceae	Coprococcus
XNTQHGXVXNNPAFTK	COG3459 Cellobiose phosphorylase	G	Bacteria	Firmicutes	Clostridia	Clostridiales	Lachnospiraceae	Coprococcus
XXGXXNVNTPDDKVNR	COG3459 Cellobiose phosphorylase	G	Bacteria	Firmicutes	Clostridia	Clostridiales	Lachnospiraceae	Coprococcus	Coprococcus eutactus
YDNVXVTDADFFK	NO HITS		Bacteria	Firmicutes	Clostridia	Clostridiales	Lachnospiraceae	Coprococcus	Coprococcus eutactus
VXXDXVFPEEXVK	NO COG		Bacteria	Firmicutes	Clostridia	Clostridiales	Lachnospiraceae	Coprococcus	Coprococcus eutactus
FSVXTAVGXXPXAVSGADXTK	COG0166 Glucose-6-phosphate isomerase	G	Bacteria	Firmicutes	Clostridia	Clostridiales	Lachnospiraceae	unclassified Lachnospiraceae	Lachnospiraceae bacterium
FSVXTAVGXXPXAVSGADXTK	COG0166 Glucose-6-phosphate isomerase	G	Bacteria	Firmicutes	Clostridia	Clostridiales	Lachnospiraceae	unclassified Lachnospiraceae	Lachnospiraceae bacterium
FSVXTAVGXXPXAVSGADXTK	COG0166 Glucose-6-phosphate isomerase	G	Bacteria	Firmicutes	Clostridia	Clostridiales	Lachnospiraceae	unclassified Lachnospiraceae	Lachnospiraceae bacterium
FSVXTAVGXXPXAVSGADXTK	COG0166 Glucose-6-phosphate isomerase	G	Bacteria	Firmicutes	Clostridia	Clostridiales	Lachnospiraceae	unclassified Lachnospiraceae	Lachnospiraceae bacterium
FSVXTAVGXXPXAVSGADXTK	COG0166 Glucose-6-phosphate isomerase	G	Bacteria	Firmicutes	Clostridia	Clostridiales	Lachnospiraceae	unclassified Lachnospiraceae	Lachnospiraceae bacterium
TEATGYGXXYXTQEXXK	COG0334 Glutamate dehydrogenase/leucine dehydrogenase	E	Bacteria	Firmicutes	Clostridia	Clostridiales	Lachnospiraceae	Marvinbryantia	Marvinbryantia formatexigens
TEATGYGXXYXTQEXXK	COG0334 Glutamate dehydrogenase/leucine dehydrogenase	E	Bacteria	Firmicutes	Clostridia	Clostridiales	Lachnospiraceae	Marvinbryantia	Marvinbryantia formatexigens
TEATGYGXXYXTQEXXK	COG0334 Glutamate dehydrogenase/leucine dehydrogenase	E	Bacteria	Firmicutes	Clostridia	Clostridiales	Lachnospiraceae	Marvinbryantia	Marvinbryantia formatexigens
WQANSDFXSTXGNR	COG1653 ABC-type sugar transport system, periplasmic component	G	Bacteria	Firmicutes	Clostridia	Clostridiales	Lachnospiraceae	Marvinbryantia	Marvinbryantia formatexigens
TEATGYGXXYXTQEXXK	COG0334 Glutamate dehydrogenase/leucine dehydrogenase	E	Bacteria	Firmicutes	Clostridia	Clostridiales	Lachnospiraceae	Marvinbryantia	Marvinbryantia formatexigens
WQANSDFXSTXGNR	COG1653 ABC-type sugar transport system, periplasmic component	G	Bacteria	Firmicutes	Clostridia	Clostridiales	Lachnospiraceae	Marvinbryantia	Marvinbryantia formatexigens
WQANSDFXSTXGNR	COG1653 ABC-type sugar transport system, periplasmic component	G	Bacteria	Firmicutes	Clostridia	Clostridiales	Lachnospiraceae	Marvinbryantia	Marvinbryantia formatexigens
TEATGYGXXYXTQEXXK	COG0334 Glutamate dehydrogenase/leucine dehydrogenase	E	Bacteria	Firmicutes	Clostridia	Clostridiales	Lachnospiraceae	Marvinbryantia	Marvinbryantia formatexigens
TEATGYGXXYXTQEXXK	COG0334 Glutamate dehydrogenase/leucine dehydrogenase	E	Bacteria	Firmicutes	Clostridia	Clostridiales	Lachnospiraceae	Marvinbryantia	Marvinbryantia formatexigens
WQANSDFXSTXGNR	COG1653 ABC-type sugar transport system, periplasmic component	G	Bacteria	Firmicutes	Clostridia	Clostridiales	Lachnospiraceae	Marvinbryantia	Marvinbryantia formatexigens
TEATGYGXXYXTQEXXK	COG0334 Glutamate dehydrogenase/leucine dehydrogenase	E	Bacteria	Firmicutes	Clostridia	Clostridiales	Lachnospiraceae	Marvinbryantia	Marvinbryantia formatexigens
TEATGYGXXYXTQEXXK	COG0334 Glutamate dehydrogenase/leucine dehydrogenase	E	Bacteria	Firmicutes	Clostridia	Clostridiales	Lachnospiraceae	Marvinbryantia	Marvinbryantia formatexigens
XPGFPXVXHGSSSVPQEFVK	COG0191 Fructose/tagatose bisphosphate aldolase	G	Bacteria	Firmicutes	Clostridia	Clostridiales	Lachnospiraceae	Marvinbryantia	Marvinbryantia formatexigens
TEATGYGXXYXTQEXXK	COG0334 Glutamate dehydrogenase/leucine dehydrogenase	E	Bacteria	Firmicutes	Clostridia	Clostridiales	Lachnospiraceae	Marvinbryantia	Marvinbryantia formatexigens
XPGFPXVXHGSSSVPQEFVK	COG0191 Fructose/tagatose bisphosphate aldolase	G	Bacteria	Firmicutes	Clostridia	Clostridiales	Lachnospiraceae	Marvinbryantia	Marvinbryantia formatexigens
GXXDAXXSGDXXK	COG1866 Phosphoenolpyruvate carboxykinase (ATP)	C	Bacteria	Firmicutes	Clostridia	Clostridiales	Lachnospiraceae	Roseburia	Roseburia intestinalis
AGDDAAGXTXSEK	COG1344 Flagellin and related hook-associated proteins	N	Bacteria	Firmicutes	Clostridia	Clostridiales	Lachnospiraceae	Roseburia
SYXGAXQNR	COG1344 Flagellin and related hook-associated proteins	N	Bacteria	Firmicutes	Clostridia	Clostridiales	Lachnospiraceae	Roseburia
XEHTXDNXDNXSENTSSAESR	COG1344 Flagellin and related hook-associated proteins	N	Bacteria	Firmicutes	Clostridia	Clostridiales	Lachnospiraceae	Roseburia	Roseburia intestinalis
SEVEFAMYFPEVHXXNAAK	COG0149 Triosephosphate isomerase	G	Bacteria	Firmicutes	Clostridia	Clostridiales	Lachnospiraceae	Roseburia	Roseburia inulinivorans
AYSXAAAEXXK	COG1344 Flagellin and related hook-associated proteins	N	Bacteria	Firmicutes	Clostridia	Clostridiales	Lachnospiraceae	Roseburia	Roseburia intestinalis
AXQDEXDQXNTEXDR	COG1344 Flagellin and related hook-associated proteins	N	Bacteria	Firmicutes	Clostridia	Clostridiales	Lachnospiraceae	Roseburia	Roseburia intestinalis
GYVDEVXEVVK	COG0334 Glutamate dehydrogenase/leucine dehydrogenase	E	Bacteria	Firmicutes	Clostridia	Clostridiales	Lachnospiraceae	Roseburia	Roseburia intestinalis
AGDDAAGXTXSEK	COG1344 Flagellin and related hook-associated proteins	N	Bacteria	Firmicutes	Clostridia	Clostridiales	Lachnospiraceae	Roseburia
XEHTXDNXDNXSENTSSAESR	COG1344 Flagellin and related hook-associated proteins	N	Bacteria	Firmicutes	Clostridia	Clostridiales	Lachnospiraceae	Roseburia	Roseburia intestinalis
SEVEFAMYFPEVHXXNAAK	COG0149 Triosephosphate isomerase	G	Bacteria	Firmicutes	Clostridia	Clostridiales	Lachnospiraceae	Roseburia	Roseburia inulinivorans
AYSXAAAEXXK	COG1344 Flagellin and related hook-associated proteins	N	Bacteria	Firmicutes	Clostridia	Clostridiales	Lachnospiraceae	Roseburia	Roseburia intestinalis
AXQDEXDQXNTEXDR	COG1344 Flagellin and related hook-associated proteins	N	Bacteria	Firmicutes	Clostridia	Clostridiales	Lachnospiraceae	Roseburia	Roseburia intestinalis
GYVDEVXEVVK	COG0334 Glutamate dehydrogenase/leucine dehydrogenase	E	Bacteria	Firmicutes	Clostridia	Clostridiales	Lachnospiraceae	Roseburia	Roseburia intestinalis
ASDNAQDGVSXXQVAEGAXNETHSXXQR	COG1344 Flagellin and related hook-associated proteins	N	Bacteria	Firmicutes	Clostridia	Clostridiales	Lachnospiraceae	Roseburia	Roseburia intestinalis
GXXDAXXSGDXXK	COG1866 Phosphoenolpyruvate carboxykinase (ATP)	C	Bacteria	Firmicutes	Clostridia	Clostridiales	Lachnospiraceae	Roseburia	Roseburia intestinalis
AGDDAAGXTXSEK	COG1344 Flagellin and related hook-associated proteins	N	Bacteria	Firmicutes	Clostridia	Clostridiales	Lachnospiraceae	Roseburia
XEHTXDNXDNXSENTSSAESR	COG1344 Flagellin and related hook-associated proteins	N	Bacteria	Firmicutes	Clostridia	Clostridiales	Lachnospiraceae	Roseburia	Roseburia intestinalis
SEVEFAMYFPEVHXXNAAK	COG0149 Triosephosphate isomerase	G	Bacteria	Firmicutes	Clostridia	Clostridiales	Lachnospiraceae	Roseburia	Roseburia inulinivorans
AXQDEXDQXNTEXDR	COG1344 Flagellin and related hook-associated proteins	N	Bacteria	Firmicutes	Clostridia	Clostridiales	Lachnospiraceae	Roseburia	Roseburia intestinalis
GYVDEVXEVVK	COG0334 Glutamate dehydrogenase/leucine dehydrogenase	E	Bacteria	Firmicutes	Clostridia	Clostridiales	Lachnospiraceae	Roseburia	Roseburia intestinalis
MQQKPMXXXTGPTAVGK	COG0324 tRNA delta(2)-isopentenylpyrophosphate transferase	J	Bacteria	Firmicutes	Clostridia	Clostridiales	Lachnospiraceae	Roseburia	Roseburia intestinalis
GXXDAXXSGDXXK	COG1866 Phosphoenolpyruvate carboxykinase (ATP)	C	Bacteria	Firmicutes	Clostridia	Clostridiales	Lachnospiraceae	Roseburia	Roseburia intestinalis
AGDDAAGXTXSEK	COG1344 Flagellin and related hook-associated proteins	N	Bacteria	Firmicutes	Clostridia	Clostridiales	Lachnospiraceae	Roseburia
SYXGAXQNR	COG1344 Flagellin and related hook-associated proteins	N	Bacteria	Firmicutes	Clostridia	Clostridiales	Lachnospiraceae	Roseburia
XEHTXDNXDNXSENTSSAESR	COG1344 Flagellin and related hook-associated proteins	N	Bacteria	Firmicutes	Clostridia	Clostridiales	Lachnospiraceae	Roseburia	Roseburia intestinalis
SEVEFAMYFPEVHXXNAAK	COG0149 Triosephosphate isomerase	G	Bacteria	Firmicutes	Clostridia	Clostridiales	Lachnospiraceae	Roseburia	Roseburia inulinivorans
AXQDEXDQXNTEXDR	COG1344 Flagellin and related hook-associated proteins	N	Bacteria	Firmicutes	Clostridia	Clostridiales	Lachnospiraceae	Roseburia	Roseburia intestinalis
GXXDAXXSGDXXK	COG1866 Phosphoenolpyruvate carboxykinase (ATP)	C	Bacteria	Firmicutes	Clostridia	Clostridiales	Lachnospiraceae	Roseburia	Roseburia intestinalis
AGDDAAGXTXSEK	COG1344 Flagellin and related hook-associated proteins	N	Bacteria	Firmicutes	Clostridia	Clostridiales	Lachnospiraceae	Roseburia
XEHTXDNXDNXSENTSSAESR	COG1344 Flagellin and related hook-associated proteins	N	Bacteria	Firmicutes	Clostridia	Clostridiales	Lachnospiraceae	Roseburia	Roseburia intestinalis
SEVEFAMYFPEVHXXNAAK	COG0149 Triosephosphate isomerase	G	Bacteria	Firmicutes	Clostridia	Clostridiales	Lachnospiraceae	Roseburia	Roseburia inulinivorans
GYVDEVXEVVK	COG0334 Glutamate dehydrogenase/leucine dehydrogenase	E	Bacteria	Firmicutes	Clostridia	Clostridiales	Lachnospiraceae	Roseburia	Roseburia intestinalis
GXXDAXXSGDXXK	COG1866 Phosphoenolpyruvate carboxykinase (ATP)	C	Bacteria	Firmicutes	Clostridia	Clostridiales	Lachnospiraceae	Roseburia	Roseburia intestinalis
EXGVTPMATWVAGAXGGVEPEXMGVGPVASTK	COG0183 Acetyl-CoA acetyltransferase	I	Bacteria	Firmicutes	Clostridia	Clostridiales	Lachnospiraceae	Roseburia	Roseburia inulinivorans
AGDDAAGXTXSEK	COG1344 Flagellin and related hook-associated proteins	N	Bacteria	Firmicutes	Clostridia	Clostridiales	Lachnospiraceae	Roseburia
XEHTXDNXDNXSENTSSAESR	COG1344 Flagellin and related hook-associated proteins	N	Bacteria	Firmicutes	Clostridia	Clostridiales	Lachnospiraceae	Roseburia	Roseburia intestinalis
SEVEFAMYFPEVHXXNAAK	COG0149 Triosephosphate isomerase	G	Bacteria	Firmicutes	Clostridia	Clostridiales	Lachnospiraceae	Roseburia	Roseburia inulinivorans
AXQDEXDQXNTEXDR	COG1344 Flagellin and related hook-associated proteins	N	Bacteria	Firmicutes	Clostridia	Clostridiales	Lachnospiraceae	Roseburia	Roseburia intestinalis
GYVDEVXEVVK	COG0334 Glutamate dehydrogenase/leucine dehydrogenase	E	Bacteria	Firmicutes	Clostridia	Clostridiales	Lachnospiraceae	Roseburia	Roseburia intestinalis
XEHTXDNXDNXSENTSSAESR	COG1344 Flagellin and related hook-associated proteins	N	Bacteria	Firmicutes	Clostridia	Clostridiales	Lachnospiraceae	Roseburia	Roseburia intestinalis
SEVEFAMYFPEVHXXNAAK	COG0149 Triosephosphate isomerase	G	Bacteria	Firmicutes	Clostridia	Clostridiales	Lachnospiraceae	Roseburia	Roseburia inulinivorans
AXQDEXDQXNTEXDR	COG1344 Flagellin and related hook-associated proteins	N	Bacteria	Firmicutes	Clostridia	Clostridiales	Lachnospiraceae	Roseburia	Roseburia intestinalis
GYVDEVXEVVK	COG0334 Glutamate dehydrogenase/leucine dehydrogenase	E	Bacteria	Firmicutes	Clostridia	Clostridiales	Lachnospiraceae	Roseburia	Roseburia intestinalis
XEHTXDNXDNXSENTSSAESR	COG1344 Flagellin and related hook-associated proteins	N	Bacteria	Firmicutes	Clostridia	Clostridiales	Lachnospiraceae	Roseburia	Roseburia intestinalis
SEVEFAMYFPEVHXXNAAK	COG0149 Triosephosphate isomerase	G	Bacteria	Firmicutes	Clostridia	Clostridiales	Lachnospiraceae	Roseburia	Roseburia inulinivorans
AYSXAAAEXXK	COG1344 Flagellin and related hook-associated proteins	N	Bacteria	Firmicutes	Clostridia	Clostridiales	Lachnospiraceae	Roseburia	Roseburia intestinalis
AXQDEXDQXNTEXDR	COG1344 Flagellin and related hook-associated proteins	N	Bacteria	Firmicutes	Clostridia	Clostridiales	Lachnospiraceae	Roseburia	Roseburia intestinalis
SEVEFAMYFPEVHXXNAAK	COG0149 Triosephosphate isomerase	G	Bacteria	Firmicutes	Clostridia	Clostridiales	Lachnospiraceae	Roseburia	Roseburia inulinivorans
SEVEFAMYFPEVHXXNAAK	COG0149 Triosephosphate isomerase	G	Bacteria	Firmicutes	Clostridia	Clostridiales	Lachnospiraceae	Roseburia	Roseburia inulinivorans
AXXTESXDXFK	NO HITS		Bacteria	Firmicutes	Clostridia	Clostridiales	Lachnospiraceae
GXXDAXXNGDXK	COG1866 Phosphoenolpyruvate carboxykinase (ATP)	C	Bacteria	Firmicutes	Clostridia	Clostridiales	Lachnospiraceae
GXXDAXXNGDXK	COG1866 Phosphoenolpyruvate carboxykinase (ATP)	C	Bacteria	Firmicutes	Clostridia	Clostridiales	Lachnospiraceae
GXXDAXXNGDXK	COG1866 Phosphoenolpyruvate carboxykinase (ATP)	C	Bacteria	Firmicutes	Clostridia	Clostridiales	Lachnospiraceae
AXDXAXAYAXAXGGAR	COG0059 Ketol-acid reductoisomerase	EH	Bacteria	Firmicutes	Clostridia	Clostridiales	Lachnospiraceae
VXCAATQQGYR	COG1653 ABC-type sugar transport system, periplasmic component	G	Bacteria	Firmicutes	Clostridia	Clostridiales	Ruminococcaceae	Faecalibacterium	Faecalibacterium prausnitzii
EATKEEVNAXYQK	COG1904 Glucuronate isomerase	G	Bacteria	Firmicutes	Clostridia	Clostridiales	Ruminococcaceae	Faecalibacterium	Faecalibacterium prausnitzii
AGXAAAQAAGAVK	COG1653 ABC-type sugar transport system, periplasmic component	G	Bacteria	Firmicutes	Clostridia	Clostridiales	Ruminococcaceae	Faecalibacterium	Faecalibacterium prausnitzii
TGNDAVAEFVGKK	COG1653 ABC-type sugar transport system, periplasmic component	G	Bacteria	Firmicutes	Clostridia	Clostridiales	Ruminococcaceae	Faecalibacterium	Faecalibacterium prausnitzii
TGNDAVAEFVGKK	COG1653 ABC-type sugar transport system, periplasmic component	G	Bacteria	Firmicutes	Clostridia	Clostridiales	Ruminococcaceae	Faecalibacterium	Faecalibacterium prausnitzii
VFEQYPEYR	COG1653 ABC-type sugar transport system, periplasmic component	G	Bacteria	Firmicutes	Clostridia	Clostridiales	Ruminococcaceae	Faecalibacterium	Faecalibacterium prausnitzii
YVDSDYVXDVKK	NO HITS		Bacteria	Firmicutes	Clostridia	Clostridiales	Ruminococcaceae	Faecalibacterium	Faecalibacterium prausnitzii
MXSGFDDAYR	NO HITS		Bacteria	Firmicutes	Clostridia	Clostridiales	Ruminococcaceae	Faecalibacterium	Faecalibacterium prausnitzii
DYFTGNVDEDTAK	NO HITS		Bacteria	Firmicutes	Clostridia	Clostridiales	Ruminococcaceae	Faecalibacterium	Faecalibacterium prausnitzii
YADNETXTAXAK	COG1053 Succinate dehydrogenase/fumarate reductase, flavoprotein subunit	C	Bacteria	Firmicutes	Clostridia	Clostridiales	Ruminococcaceae	Faecalibacterium	Faecalibacterium prausnitzii
TGNDAVAEFVGK	COG1653 ABC-type sugar transport system, periplasmic component	G	Bacteria	Firmicutes	Clostridia	Clostridiales	Ruminococcaceae	Faecalibacterium	Faecalibacterium prausnitzii
YVDSDYVXDVK	NO HITS		Bacteria	Firmicutes	Clostridia	Clostridiales	Ruminococcaceae	Faecalibacterium	Faecalibacterium prausnitzii
ADXGXTDDDXAGQYQYTK	NO HITS		Bacteria	Firmicutes	Clostridia	Clostridiales	Ruminococcaceae	Faecalibacterium	Faecalibacterium prausnitzii
GTTWQATPGXFAYR	NO HITS		Bacteria	Firmicutes	Clostridia	Clostridiales	Ruminococcaceae	Faecalibacterium	Faecalibacterium prausnitzii
XAGXFEWDSAASK	COG1653 ABC-type sugar transport system, periplasmic component	G	Bacteria	Firmicutes	Clostridia	Clostridiales	Ruminococcaceae	Faecalibacterium	Faecalibacterium prausnitzii
FENXAQVWXGGR	COG1904 Glucuronate isomerase	G	Bacteria	Firmicutes	Clostridia	Clostridiales	Ruminococcaceae	Faecalibacterium	Faecalibacterium prausnitzii
VYYXNFKPEQDQDWQDXAAEYTK	COG1653 ABC-type sugar transport system, periplasmic component	G	Bacteria	Firmicutes	Clostridia	Clostridiales	Ruminococcaceae	Faecalibacterium	Faecalibacterium prausnitzii
VTXVYAEVNPXDTXVGQTATHFK	COG1638 TRAP-type C4-dicarboxylate transport system, periplasmic component	G	Bacteria	Firmicutes	Clostridia	Clostridiales	Ruminococcaceae	Faecalibacterium	Faecalibacterium prausnitzii
VXNXWCWNDEFQSR	NO HITS		Bacteria	Firmicutes	Clostridia	Clostridiales	Ruminococcaceae	Faecalibacterium	Faecalibacterium prausnitzii
XXDPECFTQEWSTYVSK	COG1653 ABC-type sugar transport system, periplasmic component	G	Bacteria	Firmicutes	Clostridia	Clostridiales	Ruminococcaceae	Faecalibacterium	Faecalibacterium prausnitzii
XASXGXXGNFVGMXTDSR	COG1904 Glucuronate isomerase	G	Bacteria	Firmicutes	Clostridia	Clostridiales	Ruminococcaceae	Faecalibacterium	Faecalibacterium prausnitzii
DGDAVTSXAYVXETYGXXYNK	COG1653 ABC-type sugar transport system, periplasmic component	G	Bacteria	Firmicutes	Clostridia	Clostridiales	Ruminococcaceae	Faecalibacterium	Faecalibacterium prausnitzii
EATKEEVNAXYQK	COG1904 Glucuronate isomerase	G	Bacteria	Firmicutes	Clostridia	Clostridiales	Ruminococcaceae	Faecalibacterium	Faecalibacterium prausnitzii
TGNDAVAEFVGKK	COG1653 ABC-type sugar transport system, periplasmic component	G	Bacteria	Firmicutes	Clostridia	Clostridiales	Ruminococcaceae	Faecalibacterium	Faecalibacterium prausnitzii
TGNDAVAEFVGKK	COG1653 ABC-type sugar transport system, periplasmic component	G	Bacteria	Firmicutes	Clostridia	Clostridiales	Ruminococcaceae	Faecalibacterium	Faecalibacterium prausnitzii
VFEQYPEYR	COG1653 ABC-type sugar transport system, periplasmic component	G	Bacteria	Firmicutes	Clostridia	Clostridiales	Ruminococcaceae	Faecalibacterium	Faecalibacterium prausnitzii
YVDSDYVXDVKK	NO HITS		Bacteria	Firmicutes	Clostridia	Clostridiales	Ruminococcaceae	Faecalibacterium	Faecalibacterium prausnitzii
YVDSDYVXDVKK	NO HITS		Bacteria	Firmicutes	Clostridia	Clostridiales	Ruminococcaceae	Faecalibacterium	Faecalibacterium prausnitzii
MXSGFDDAYR	NO HITS		Bacteria	Firmicutes	Clostridia	Clostridiales	Ruminococcaceae	Faecalibacterium	Faecalibacterium prausnitzii
TGNDAVAEFVGK	COG1653 ABC-type sugar transport system, periplasmic component	G	Bacteria	Firmicutes	Clostridia	Clostridiales	Ruminococcaceae	Faecalibacterium	Faecalibacterium prausnitzii
YVDSDYVXDVK	NO HITS		Bacteria	Firmicutes	Clostridia	Clostridiales	Ruminococcaceae	Faecalibacterium	Faecalibacterium prausnitzii
HFFTVKPVSGXADFK	COG1638 TRAP-type C4-dicarboxylate transport system, periplasmic component	G	Bacteria	Firmicutes	Clostridia	Clostridiales	Ruminococcaceae	Faecalibacterium	Faecalibacterium prausnitzii
GXQXGAGNAXXXK	COG0148 Enolase	G	Bacteria	Firmicutes	Clostridia	Clostridiales	Ruminococcaceae	Faecalibacterium	Faecalibacterium prausnitzii
XGDDYYPXHXGAYDR	COG1653 ABC-type sugar transport system, periplasmic component	G	Bacteria	Firmicutes	Clostridia	Clostridiales	Ruminococcaceae	Faecalibacterium	Faecalibacterium prausnitzii
SSXWDSQWASDQGPTGK	NO HITS		Bacteria	Firmicutes	Clostridia	Clostridiales	Ruminococcaceae	Faecalibacterium	Faecalibacterium prausnitzii
GTTWQATPGXFAYR	NO HITS		Bacteria	Firmicutes	Clostridia	Clostridiales	Ruminococcaceae	Faecalibacterium	Faecalibacterium prausnitzii
SDFXGGQNHXAXFAEAATK	NO HITS		Bacteria	Firmicutes	Clostridia	Clostridiales	Ruminococcaceae	Faecalibacterium	Faecalibacterium prausnitzii
AXTFAXDRDSXTNDVXK	COG4166 ABC-type oligopeptide transport system, periplasmic component	E	Bacteria	Firmicutes	Clostridia	Clostridiales	Ruminococcaceae	Faecalibacterium	Faecalibacterium prausnitzii
VTXVYAEVNPXDTXVGQTATHFK	COG1638 TRAP-type C4-dicarboxylate transport system, periplasmic component	G	Bacteria	Firmicutes	Clostridia	Clostridiales	Ruminococcaceae	Faecalibacterium	Faecalibacterium prausnitzii
VXNXWCWNDEFQSR	NO HITS		Bacteria	Firmicutes	Clostridia	Clostridiales	Ruminococcaceae	Faecalibacterium	Faecalibacterium prausnitzii
DSTNPXXTXANQYVADGK	COG1653 ABC-type sugar transport system, periplasmic component	G	Bacteria	Firmicutes	Clostridia	Clostridiales	Ruminococcaceae	Faecalibacterium	Faecalibacterium prausnitzii
XXDPECFTQEWSTYVSK	COG1653 ABC-type sugar transport system, periplasmic component	G	Bacteria	Firmicutes	Clostridia	Clostridiales	Ruminococcaceae	Faecalibacterium	Faecalibacterium prausnitzii
AGXAAAQAAGAVK	COG1653 ABC-type sugar transport system, periplasmic component	G	Bacteria	Firmicutes	Clostridia	Clostridiales	Ruminococcaceae	Faecalibacterium	Faecalibacterium prausnitzii
AGXAAAQAAGAVK	COG1653 ABC-type sugar transport system, periplasmic component	G	Bacteria	Firmicutes	Clostridia	Clostridiales	Ruminococcaceae	Faecalibacterium	Faecalibacterium prausnitzii
TGNDAVAEFVGKK	COG1653 ABC-type sugar transport system, periplasmic component	G	Bacteria	Firmicutes	Clostridia	Clostridiales	Ruminococcaceae	Faecalibacterium	Faecalibacterium prausnitzii
VFEQYPEYR	COG1653 ABC-type sugar transport system, periplasmic component	G	Bacteria	Firmicutes	Clostridia	Clostridiales	Ruminococcaceae	Faecalibacterium	Faecalibacterium prausnitzii
YVDSDYVXDVKK	NO HITS		Bacteria	Firmicutes	Clostridia	Clostridiales	Ruminococcaceae	Faecalibacterium	Faecalibacterium prausnitzii
YVDSDYVXDVKK	NO HITS		Bacteria	Firmicutes	Clostridia	Clostridiales	Ruminococcaceae	Faecalibacterium	Faecalibacterium prausnitzii
TGNDAVAEFVGK	COG1653 ABC-type sugar transport system, periplasmic component	G	Bacteria	Firmicutes	Clostridia	Clostridiales	Ruminococcaceae	Faecalibacterium	Faecalibacterium prausnitzii
EXXTAAGYTQDDXK	COG1653 ABC-type sugar transport system, periplasmic component	G	Bacteria	Firmicutes	Clostridia	Clostridiales	Ruminococcaceae	Faecalibacterium	Faecalibacterium prausnitzii
YVDSDYVXDVK	NO HITS		Bacteria	Firmicutes	Clostridia	Clostridiales	Ruminococcaceae	Faecalibacterium	Faecalibacterium prausnitzii
MGFVXPFKK	COG1653 ABC-type sugar transport system, periplasmic component	G	Bacteria	Firmicutes	Clostridia	Clostridiales	Ruminococcaceae	Faecalibacterium	Faecalibacterium prausnitzii
SSXWDSQWASDQGPTGK	NO HITS		Bacteria	Firmicutes	Clostridia	Clostridiales	Ruminococcaceae	Faecalibacterium	Faecalibacterium prausnitzii
XGDDYYPXHXGAYDR	COG1653 ABC-type sugar transport system, periplasmic component	G	Bacteria	Firmicutes	Clostridia	Clostridiales	Ruminococcaceae	Faecalibacterium	Faecalibacterium prausnitzii
VEQYYWVDYVK	COG1879 ABC-type sugar transport system, periplasmic component	G	Bacteria	Firmicutes	Clostridia	Clostridiales	Ruminococcaceae	Faecalibacterium	Faecalibacterium prausnitzii
SDFXGGQNHXAXFAEAATK	NO HITS		Bacteria	Firmicutes	Clostridia	Clostridiales	Ruminococcaceae	Faecalibacterium	Faecalibacterium prausnitzii
XAGXFEWDSAASK	COG1653 ABC-type sugar transport system, periplasmic component	G	Bacteria	Firmicutes	Clostridia	Clostridiales	Ruminococcaceae	Faecalibacterium	Faecalibacterium prausnitzii
AXTFAXDRDSXTNDVXK	COG4166 ABC-type oligopeptide transport system, periplasmic component	E	Bacteria	Firmicutes	Clostridia	Clostridiales	Ruminococcaceae	Faecalibacterium	Faecalibacterium prausnitzii
EKYPEXTDVVWPA	NO HITS		Bacteria	Firmicutes	Clostridia	Clostridiales	Ruminococcaceae	Faecalibacterium	Faecalibacterium prausnitzii
VYYXNFKPEQDQDWQDXAAEYTK	COG1653 ABC-type sugar transport system, periplasmic component	G	Bacteria	Firmicutes	Clostridia	Clostridiales	Ruminococcaceae	Faecalibacterium	Faecalibacterium prausnitzii
VTXVYAEVNPXDTXVGQTATHFK	COG1638 TRAP-type C4-dicarboxylate transport system, periplasmic component	G	Bacteria	Firmicutes	Clostridia	Clostridiales	Ruminococcaceae	Faecalibacterium	Faecalibacterium prausnitzii
VXNXWCWNDEFQSR	NO HITS		Bacteria	Firmicutes	Clostridia	Clostridiales	Ruminococcaceae	Faecalibacterium	Faecalibacterium prausnitzii
XXDPECFTQEWSTYVSK	COG1653 ABC-type sugar transport system, periplasmic component	G	Bacteria	Firmicutes	Clostridia	Clostridiales	Ruminococcaceae	Faecalibacterium	Faecalibacterium prausnitzii
GXEXAEQXAAAXGGGVVGASR	COG2025 Electron transfer flavoprotein, alpha subunit	C	Bacteria	Firmicutes	Clostridia	Clostridiales	Ruminococcaceae	Faecalibacterium	Faecalibacterium prausnitzii
XASXGXXGNFVGMXTDSR	COG1904 Glucuronate isomerase	G	Bacteria	Firmicutes	Clostridia	Clostridiales	Ruminococcaceae	Faecalibacterium	Faecalibacterium prausnitzii
GYADEXEGAEDFTSAAXAXXK	COG3968 Uncharacterized protein related to glutamine synthetase	R	Bacteria	Firmicutes	Clostridia	Clostridiales	Ruminococcaceae	Faecalibacterium	Faecalibacterium prausnitzii
XASXGXXGNFVGMXTDSR	COG1904 Glucuronate isomerase	G	Bacteria	Firmicutes	Clostridia	Clostridiales	Ruminococcaceae	Faecalibacterium	Faecalibacterium prausnitzii
XASXGXXGNFVGMXTDSR	COG1904 Glucuronate isomerase	G	Bacteria	Firmicutes	Clostridia	Clostridiales	Ruminococcaceae	Faecalibacterium	Faecalibacterium prausnitzii
DGDAVTSXAYVXETYGXXYNK	COG1653 ABC-type sugar transport system, periplasmic component	G	Bacteria	Firmicutes	Clostridia	Clostridiales	Ruminococcaceae	Faecalibacterium	Faecalibacterium prausnitzii
SXANXGXXGNFVGMXTDSR	COG1904 Glucuronate isomerase	G	Bacteria	Firmicutes	Clostridia	Clostridiales	Ruminococcaceae	Faecalibacterium	Faecalibacterium prausnitzii
AGXAAAQAAGAVK	COG1653 ABC-type sugar transport system, periplasmic component	G	Bacteria	Firmicutes	Clostridia	Clostridiales	Ruminococcaceae	Faecalibacterium	Faecalibacterium prausnitzii
TGNDAVAEFVGKK	COG1653 ABC-type sugar transport system, periplasmic component	G	Bacteria	Firmicutes	Clostridia	Clostridiales	Ruminococcaceae	Faecalibacterium	Faecalibacterium prausnitzii
YVDSDYVXDVKK	NO HITS		Bacteria	Firmicutes	Clostridia	Clostridiales	Ruminococcaceae	Faecalibacterium	Faecalibacterium prausnitzii
QXTXDTQDYTNNEK	NO HITS		Bacteria	Firmicutes	Clostridia	Clostridiales	Ruminococcaceae	Faecalibacterium	Faecalibacterium prausnitzii
TGNDAVAEFVGK	COG1653 ABC-type sugar transport system, periplasmic component	G	Bacteria	Firmicutes	Clostridia	Clostridiales	Ruminococcaceae	Faecalibacterium	Faecalibacterium prausnitzii
MXSGFDDAYR	NO HITS		Bacteria	Firmicutes	Clostridia	Clostridiales	Ruminococcaceae	Faecalibacterium	Faecalibacterium prausnitzii
EXXTAAGYTQDDXK	COG1653 ABC-type sugar transport system, periplasmic component	G	Bacteria	Firmicutes	Clostridia	Clostridiales	Ruminococcaceae	Faecalibacterium	Faecalibacterium prausnitzii
YVDSDYVXDVK	NO HITS		Bacteria	Firmicutes	Clostridia	Clostridiales	Ruminococcaceae	Faecalibacterium	Faecalibacterium prausnitzii
NANEPEFXQAVR	COG0334 Glutamate dehydrogenase/leucine dehydrogenase	E	Bacteria	Firmicutes	Clostridia	Clostridiales	Ruminococcaceae	Faecalibacterium	Faecalibacterium prausnitzii
AAAASXDMPXYR	COG0148 Enolase	G	Bacteria	Firmicutes	Clostridia	Clostridiales	Ruminococcaceae	Faecalibacterium	Faecalibacterium prausnitzii
ADXGXTDDDXAGQYQYTK	NO HITS		Bacteria	Firmicutes	Clostridia	Clostridiales	Ruminococcaceae	Faecalibacterium	Faecalibacterium prausnitzii
SSXWDSQWASDQGPTGK	NO HITS		Bacteria	Firmicutes	Clostridia	Clostridiales	Ruminococcaceae	Faecalibacterium	Faecalibacterium prausnitzii
XGDDYYPXHXGAYDR	COG1653 ABC-type sugar transport system, periplasmic component	G	Bacteria	Firmicutes	Clostridia	Clostridiales	Ruminococcaceae	Faecalibacterium	Faecalibacterium prausnitzii
DXGXTDSDXAGQYQYTK	NO HITS		Bacteria	Firmicutes	Clostridia	Clostridiales	Ruminococcaceae	Faecalibacterium	Faecalibacterium prausnitzii
XYGEXTSDSFAXK	COG1653 ABC-type sugar transport system, periplasmic component	G	Bacteria	Firmicutes	Clostridia	Clostridiales	Ruminococcaceae	Faecalibacterium	Faecalibacterium prausnitzii
SDFXGGQNHXAXFAEAATK	NO HITS		Bacteria	Firmicutes	Clostridia	Clostridiales	Ruminococcaceae	Faecalibacterium	Faecalibacterium prausnitzii
XAGXFEWDSAASK	COG1653 ABC-type sugar transport system, periplasmic component	G	Bacteria	Firmicutes	Clostridia	Clostridiales	Ruminococcaceae	Faecalibacterium	Faecalibacterium prausnitzii
VTXVYAEVNPXDTXVGQTATHFK	COG1638 TRAP-type C4-dicarboxylate transport system, periplasmic component	G	Bacteria	Firmicutes	Clostridia	Clostridiales	Ruminococcaceae	Faecalibacterium	Faecalibacterium prausnitzii
VXNXWCWNDEFQGR	NO HITS		Bacteria	Firmicutes	Clostridia	Clostridiales	Ruminococcaceae	Faecalibacterium	Faecalibacterium prausnitzii
VXNXWCWNDEFQSR	NO HITS		Bacteria	Firmicutes	Clostridia	Clostridiales	Ruminococcaceae	Faecalibacterium	Faecalibacterium prausnitzii
XXDPECFTQEWSTYVSK	COG1653 ABC-type sugar transport system, periplasmic component	G	Bacteria	Firmicutes	Clostridia	Clostridiales	Ruminococcaceae	Faecalibacterium	Faecalibacterium prausnitzii
XFAESGAXQPVXGXADSXEGDNK	NO HITS		Bacteria	Firmicutes	Clostridia	Clostridiales	Ruminococcaceae	Faecalibacterium	Faecalibacterium prausnitzii
VAVXVPDEYXGDVXGDXNAR	COG0480 Translation elongation factors (GTPases)	J	Bacteria	Firmicutes	Clostridia	Clostridiales	Ruminococcaceae	Faecalibacterium	Faecalibacterium prausnitzii
VNAFVPXAQMFGYATDXR	COG0480 Translation elongation factors (GTPases)	J	Bacteria	Firmicutes	Clostridia	Clostridiales	Ruminococcaceae	Faecalibacterium	Faecalibacterium prausnitzii
GYADEXEGAEDFTSAAXAXXK	COG3968 Uncharacterized protein related to glutamine synthetase	R	Bacteria	Firmicutes	Clostridia	Clostridiales	Ruminococcaceae	Faecalibacterium	Faecalibacterium prausnitzii
XASXGXXGNFVGMXTDSR	COG1904 Glucuronate isomerase	G	Bacteria	Firmicutes	Clostridia	Clostridiales	Ruminococcaceae	Faecalibacterium	Faecalibacterium prausnitzii
XASXGXXGNFVGMXTDSR	COG1904 Glucuronate isomerase	G	Bacteria	Firmicutes	Clostridia	Clostridiales	Ruminococcaceae	Faecalibacterium	Faecalibacterium prausnitzii
DGDAVTSXAYVXETYGXXYNK	COG1653 ABC-type sugar transport system, periplasmic component	G	Bacteria	Firmicutes	Clostridia	Clostridiales	Ruminococcaceae	Faecalibacterium	Faecalibacterium prausnitzii
AGXAAAQAAGAVK	COG1653 ABC-type sugar transport system, periplasmic component	G	Bacteria	Firmicutes	Clostridia	Clostridiales	Ruminococcaceae	Faecalibacterium	Faecalibacterium prausnitzii
AGXAAAQAAGAVK	COG1653 ABC-type sugar transport system, periplasmic component	G	Bacteria	Firmicutes	Clostridia	Clostridiales	Ruminococcaceae	Faecalibacterium	Faecalibacterium prausnitzii
KGDTVFDTDEGPR	COG0183 Acetyl-CoA acetyltransferase	I	Bacteria	Firmicutes	Clostridia	Clostridiales	Ruminococcaceae	Faecalibacterium	Faecalibacterium prausnitzii
TGNDAVAEFVGKK	COG1653 ABC-type sugar transport system, periplasmic component	G	Bacteria	Firmicutes	Clostridia	Clostridiales	Ruminococcaceae	Faecalibacterium	Faecalibacterium prausnitzii
YVDSDYVXDVKK	NO HITS		Bacteria	Firmicutes	Clostridia	Clostridiales	Ruminococcaceae	Faecalibacterium	Faecalibacterium prausnitzii
TGNDAVAEFVGK	COG1653 ABC-type sugar transport system, periplasmic component	G	Bacteria	Firmicutes	Clostridia	Clostridiales	Ruminococcaceae	Faecalibacterium	Faecalibacterium prausnitzii
XGDDYYPXHXGAYDR	COG1653 ABC-type sugar transport system, periplasmic component	G	Bacteria	Firmicutes	Clostridia	Clostridiales	Ruminococcaceae	Faecalibacterium	Faecalibacterium prausnitzii
DXGXTDSDXAGQYQYTK	NO HITS		Bacteria	Firmicutes	Clostridia	Clostridiales	Ruminococcaceae	Faecalibacterium	Faecalibacterium prausnitzii
ATFTDPFQGXK	COG0683 ABC-type branched-chain amino acid transport systems, periplasmic component	E	Bacteria	Firmicutes	Clostridia	Clostridiales	Ruminococcaceae	Faecalibacterium	Faecalibacterium prausnitzii
SDFXGGQNHXAXFAEAATK	NO HITS		Bacteria	Firmicutes	Clostridia	Clostridiales	Ruminococcaceae	Faecalibacterium	Faecalibacterium prausnitzii
XAGXFEWDSAASK	COG1653 ABC-type sugar transport system, periplasmic component	G	Bacteria	Firmicutes	Clostridia	Clostridiales	Ruminococcaceae	Faecalibacterium	Faecalibacterium prausnitzii
XXVDXXNEGGFSK	COG0059 Ketol-acid reductoisomerase	EH	Bacteria	Firmicutes	Clostridia	Clostridiales	Ruminococcaceae	Faecalibacterium	Faecalibacterium prausnitzii
QXNDEXTADXFEHXK	COG0574 Phosphoenolpyruvate synthase/pyruvate phosphate dikinase	G	Bacteria	Firmicutes	Clostridia	Clostridiales	Ruminococcaceae	Faecalibacterium	Faecalibacterium prausnitzii
VYYXNFKPEQDQDWQDXAAEYTK	COG1653 ABC-type sugar transport system, periplasmic component	G	Bacteria	Firmicutes	Clostridia	Clostridiales	Ruminococcaceae	Faecalibacterium	Faecalibacterium prausnitzii
FGGTXANVPAAEXGSXVXK	COG0183 Acetyl-CoA acetyltransferase	I	Bacteria	Firmicutes	Clostridia	Clostridiales	Ruminococcaceae	Faecalibacterium	Faecalibacterium prausnitzii
FGGTXANVPAAEXGSXVXK	COG0183 Acetyl-CoA acetyltransferase	I	Bacteria	Firmicutes	Clostridia	Clostridiales	Ruminococcaceae	Faecalibacterium	Faecalibacterium prausnitzii
XFFWNMTTFNK	COG1653 ABC-type sugar transport system, periplasmic component	G	Bacteria	Firmicutes	Clostridia	Clostridiales	Ruminococcaceae	Faecalibacterium	Faecalibacterium prausnitzii
VTXVYAEVNPXDTXVGQTATHFK	COG1638 TRAP-type C4-dicarboxylate transport system, periplasmic component	G	Bacteria	Firmicutes	Clostridia	Clostridiales	Ruminococcaceae	Faecalibacterium	Faecalibacterium prausnitzii
VXNXWCWNDEFQSR	NO HITS		Bacteria	Firmicutes	Clostridia	Clostridiales	Ruminococcaceae	Faecalibacterium	Faecalibacterium prausnitzii
VXNXWCWNDEFQGR	NO HITS		Bacteria	Firmicutes	Clostridia	Clostridiales	Ruminococcaceae	Faecalibacterium	Faecalibacterium prausnitzii
AHFWNFANSDXAPEFXNEPQEXGXPVR	COG1638 TRAP-type C4-dicarboxylate transport system, periplasmic component	G	Bacteria	Firmicutes	Clostridia	Clostridiales	Ruminococcaceae	Faecalibacterium	Faecalibacterium prausnitzii
YGKDWADPTTSTXNYTADEXAEGXDFXK	COG1653 ABC-type sugar transport system, periplasmic component	G	Bacteria	Firmicutes	Clostridia	Clostridiales	Ruminococcaceae	Faecalibacterium	Faecalibacterium prausnitzii
GXEXAEQXAAAXGGGVVGASR	COG2025 Electron transfer flavoprotein, alpha subunit	C	Bacteria	Firmicutes	Clostridia	Clostridiales	Ruminococcaceae	Faecalibacterium	Faecalibacterium prausnitzii
CVAEAATXXNFXXNEEK	COG1653 ABC-type sugar transport system, periplasmic component	G	Bacteria	Firmicutes	Clostridia	Clostridiales	Ruminococcaceae	Faecalibacterium	Faecalibacterium prausnitzii
XASXGXXGNFVGMXTDSR	COG1904 Glucuronate isomerase	G	Bacteria	Firmicutes	Clostridia	Clostridiales	Ruminococcaceae	Faecalibacterium	Faecalibacterium prausnitzii
XASXGXXGNFVGMXTDSR	COG1904 Glucuronate isomerase	G	Bacteria	Firmicutes	Clostridia	Clostridiales	Ruminococcaceae	Faecalibacterium	Faecalibacterium prausnitzii
AGXAAAQAAGAVK	COG1653 ABC-type sugar transport system, periplasmic component	G	Bacteria	Firmicutes	Clostridia	Clostridiales	Ruminococcaceae	Faecalibacterium	Faecalibacterium prausnitzii
VEAGTTVYNSVK	COG0480 Translation elongation factors (GTPases)	J	Bacteria	Firmicutes	Clostridia	Clostridiales	Ruminococcaceae	Faecalibacterium	Faecalibacterium prausnitzii
TGNDAVAEFVGKK	COG1653 ABC-type sugar transport system, periplasmic component	G	Bacteria	Firmicutes	Clostridia	Clostridiales	Ruminococcaceae	Faecalibacterium	Faecalibacterium prausnitzii
YVDSDYVXDVKK	NO HITS		Bacteria	Firmicutes	Clostridia	Clostridiales	Ruminococcaceae	Faecalibacterium	Faecalibacterium prausnitzii
YVDSDYVXDVKK	NO HITS		Bacteria	Firmicutes	Clostridia	Clostridiales	Ruminococcaceae	Faecalibacterium	Faecalibacterium prausnitzii
TGNDAVAEFVGK	COG1653 ABC-type sugar transport system, periplasmic component	G	Bacteria	Firmicutes	Clostridia	Clostridiales	Ruminococcaceae	Faecalibacterium	Faecalibacterium prausnitzii
EXXTAAGYTQDDXK	COG1653 ABC-type sugar transport system, periplasmic component	G	Bacteria	Firmicutes	Clostridia	Clostridiales	Ruminococcaceae	Faecalibacterium	Faecalibacterium prausnitzii
YVDSDYVXDVK	NO HITS		Bacteria	Firmicutes	Clostridia	Clostridiales	Ruminococcaceae	Faecalibacterium	Faecalibacterium prausnitzii
VSYPXDHXQNXVRPXSSAPAAK	COG1866 Phosphoenolpyruvate carboxykinase (ATP)	C	Bacteria	Firmicutes	Clostridia	Clostridiales	Ruminococcaceae	Faecalibacterium	Faecalibacterium prausnitzii
ADXGXTDDDXAGQYQYTK	NO HITS		Bacteria	Firmicutes	Clostridia	Clostridiales	Ruminococcaceae	Faecalibacterium	Faecalibacterium prausnitzii
XGDDYYPXHXGAYDR	COG1653 ABC-type sugar transport system, periplasmic component	G	Bacteria	Firmicutes	Clostridia	Clostridiales	Ruminococcaceae	Faecalibacterium	Faecalibacterium prausnitzii
SSXWDSQWASDQGPTGK	NO HITS		Bacteria	Firmicutes	Clostridia	Clostridiales	Ruminococcaceae	Faecalibacterium	Faecalibacterium prausnitzii
DXGXTDSDXAGQYQYTK	NO HITS		Bacteria	Firmicutes	Clostridia	Clostridiales	Ruminococcaceae	Faecalibacterium	Faecalibacterium prausnitzii
XYGEXTSDSFAXK	COG1653 ABC-type sugar transport system, periplasmic component	G	Bacteria	Firmicutes	Clostridia	Clostridiales	Ruminococcaceae	Faecalibacterium	Faecalibacterium prausnitzii
VEQYYWVDYVK	COG1879 ABC-type sugar transport system, periplasmic component	G	Bacteria	Firmicutes	Clostridia	Clostridiales	Ruminococcaceae	Faecalibacterium	Faecalibacterium prausnitzii
SDFXGGQNHXAXFAEAATK	NO HITS		Bacteria	Firmicutes	Clostridia	Clostridiales	Ruminococcaceae	Faecalibacterium	Faecalibacterium prausnitzii
XAGXFEWDSAASK	COG1653 ABC-type sugar transport system, periplasmic component	G	Bacteria	Firmicutes	Clostridia	Clostridiales	Ruminococcaceae	Faecalibacterium	Faecalibacterium prausnitzii
VYYXNFKPEQDQDWQDXAAEYTK	COG1653 ABC-type sugar transport system, periplasmic component	G	Bacteria	Firmicutes	Clostridia	Clostridiales	Ruminococcaceae	Faecalibacterium	Faecalibacterium prausnitzii
FGGTXANVPAAEXGSXVXK	COG0183 Acetyl-CoA acetyltransferase	I	Bacteria	Firmicutes	Clostridia	Clostridiales	Ruminococcaceae	Faecalibacterium	Faecalibacterium prausnitzii
VTXVYAEVNPXDTXVGQTATHFK	COG1638 TRAP-type C4-dicarboxylate transport system, periplasmic component	G	Bacteria	Firmicutes	Clostridia	Clostridiales	Ruminococcaceae	Faecalibacterium	Faecalibacterium prausnitzii
VXNXWCWNDEFQGR	NO HITS		Bacteria	Firmicutes	Clostridia	Clostridiales	Ruminococcaceae	Faecalibacterium	Faecalibacterium prausnitzii
VXNXWCWNDEFQSR	NO HITS		Bacteria	Firmicutes	Clostridia	Clostridiales	Ruminococcaceae	Faecalibacterium	Faecalibacterium prausnitzii
QXWDXYXTDSTCDPTXXASK	COG1653 ABC-type sugar transport system, periplasmic component	G	Bacteria	Firmicutes	Clostridia	Clostridiales	Ruminococcaceae	Faecalibacterium	Faecalibacterium prausnitzii
XXDPECFTQEWSTYVSK	COG1653 ABC-type sugar transport system, periplasmic component	G	Bacteria	Firmicutes	Clostridia	Clostridiales	Ruminococcaceae	Faecalibacterium	Faecalibacterium prausnitzii
AHFWNFANSDXAPEFXNEPQEXGXPVR	COG1638 TRAP-type C4-dicarboxylate transport system, periplasmic component	G	Bacteria	Firmicutes	Clostridia	Clostridiales	Ruminococcaceae	Faecalibacterium	Faecalibacterium prausnitzii
GXEXAEQXAAAXGGGVVGASR	COG2025 Electron transfer flavoprotein, alpha subunit	C	Bacteria	Firmicutes	Clostridia	Clostridiales	Ruminococcaceae	Faecalibacterium	Faecalibacterium prausnitzii
XASXGXXGNFVGMXTDSR	COG1904 Glucuronate isomerase	G	Bacteria	Firmicutes	Clostridia	Clostridiales	Ruminococcaceae	Faecalibacterium	Faecalibacterium prausnitzii
XASXGXXGNFVGMXTDSR	COG1904 Glucuronate isomerase	G	Bacteria	Firmicutes	Clostridia	Clostridiales	Ruminococcaceae	Faecalibacterium	Faecalibacterium prausnitzii
DGDAVTSXAYVXETYGXXYNK	COG1653 ABC-type sugar transport system, periplasmic component	G	Bacteria	Firmicutes	Clostridia	Clostridiales	Ruminococcaceae	Faecalibacterium	Faecalibacterium prausnitzii
DGDAVTSXAYVXETYGXXYNK	COG1653 ABC-type sugar transport system, periplasmic component	G	Bacteria	Firmicutes	Clostridia	Clostridiales	Ruminococcaceae	Faecalibacterium	Faecalibacterium prausnitzii
AGXAAAQAAGAVK	COG1653 ABC-type sugar transport system, periplasmic component	G	Bacteria	Firmicutes	Clostridia	Clostridiales	Ruminococcaceae	Faecalibacterium	Faecalibacterium prausnitzii
KGDTVFDTDEGPR	COG0183 Acetyl-CoA acetyltransferase	I	Bacteria	Firmicutes	Clostridia	Clostridiales	Ruminococcaceae	Faecalibacterium	Faecalibacterium prausnitzii
TGNDAVAEFVGKK	COG1653 ABC-type sugar transport system, periplasmic component	G	Bacteria	Firmicutes	Clostridia	Clostridiales	Ruminococcaceae	Faecalibacterium	Faecalibacterium prausnitzii
YVDSDYVXDVKK	NO HITS		Bacteria	Firmicutes	Clostridia	Clostridiales	Ruminococcaceae	Faecalibacterium	Faecalibacterium prausnitzii
TGNDAVAEFVGK	COG1653 ABC-type sugar transport system, periplasmic component	G	Bacteria	Firmicutes	Clostridia	Clostridiales	Ruminococcaceae	Faecalibacterium	Faecalibacterium prausnitzii
MXSGFDDAYR	NO HITS		Bacteria	Firmicutes	Clostridia	Clostridiales	Ruminococcaceae	Faecalibacterium	Faecalibacterium prausnitzii
EXXTAAGYTQDDXK	COG1653 ABC-type sugar transport system, periplasmic component	G	Bacteria	Firmicutes	Clostridia	Clostridiales	Ruminococcaceae	Faecalibacterium	Faecalibacterium prausnitzii
YVDSDYVXDVK	NO HITS		Bacteria	Firmicutes	Clostridia	Clostridiales	Ruminococcaceae	Faecalibacterium	Faecalibacterium prausnitzii
MGFVXPFKK	COG1653 ABC-type sugar transport system, periplasmic component	G	Bacteria	Firmicutes	Clostridia	Clostridiales	Ruminococcaceae	Faecalibacterium	Faecalibacterium prausnitzii
SSXWDSQWASDQGPTGK	NO HITS		Bacteria	Firmicutes	Clostridia	Clostridiales	Ruminococcaceae	Faecalibacterium	Faecalibacterium prausnitzii
XGDDYYPXHXGAYDR	COG1653 ABC-type sugar transport system, periplasmic component	G	Bacteria	Firmicutes	Clostridia	Clostridiales	Ruminococcaceae	Faecalibacterium	Faecalibacterium prausnitzii
DXGXTDSDXAGQYQYTK	NO HITS		Bacteria	Firmicutes	Clostridia	Clostridiales	Ruminococcaceae	Faecalibacterium	Faecalibacterium prausnitzii
XYGEXTSDSFAXK	COG1653 ABC-type sugar transport system, periplasmic component	G	Bacteria	Firmicutes	Clostridia	Clostridiales	Ruminococcaceae	Faecalibacterium	Faecalibacterium prausnitzii
GTTWQATPGXFAYR	NO HITS		Bacteria	Firmicutes	Clostridia	Clostridiales	Ruminococcaceae	Faecalibacterium	Faecalibacterium prausnitzii
VEQYYWVDYVK	COG1879 ABC-type sugar transport system, periplasmic component	G	Bacteria	Firmicutes	Clostridia	Clostridiales	Ruminococcaceae	Faecalibacterium	Faecalibacterium prausnitzii
SDFXGGQNHXAXFAEAATK	NO HITS		Bacteria	Firmicutes	Clostridia	Clostridiales	Ruminococcaceae	Faecalibacterium	Faecalibacterium prausnitzii
XAGXFEWDSAASK	COG1653 ABC-type sugar transport system, periplasmic component	G	Bacteria	Firmicutes	Clostridia	Clostridiales	Ruminococcaceae	Faecalibacterium	Faecalibacterium prausnitzii
VYYXNFKPEQDQDWQDXAAEYTK	COG1653 ABC-type sugar transport system, periplasmic component	G	Bacteria	Firmicutes	Clostridia	Clostridiales	Ruminococcaceae	Faecalibacterium	Faecalibacterium prausnitzii
FGGTXANVPAAEXGSXVXK	COG0183 Acetyl-CoA acetyltransferase	I	Bacteria	Firmicutes	Clostridia	Clostridiales	Ruminococcaceae	Faecalibacterium	Faecalibacterium prausnitzii
VTXVYAEVNPXDTXVGQTATHFK	COG1638 TRAP-type C4-dicarboxylate transport system, periplasmic component	G	Bacteria	Firmicutes	Clostridia	Clostridiales	Ruminococcaceae	Faecalibacterium	Faecalibacterium prausnitzii
VXNXWCWNDEFQSR	NO HITS		Bacteria	Firmicutes	Clostridia	Clostridiales	Ruminococcaceae	Faecalibacterium	Faecalibacterium prausnitzii
XFAESGAXQPVXGXADSXEGDNK	NO HITS		Bacteria	Firmicutes	Clostridia	Clostridiales	Ruminococcaceae	Faecalibacterium	Faecalibacterium prausnitzii
AHFWNFANSDXAPEFXNEPQEXGXPVR	COG1638 TRAP-type C4-dicarboxylate transport system, periplasmic component	G	Bacteria	Firmicutes	Clostridia	Clostridiales	Ruminococcaceae	Faecalibacterium	Faecalibacterium prausnitzii
YGKDWADPTTSTXNYTADEXAEGXDFXK	COG1653 ABC-type sugar transport system, periplasmic component	G	Bacteria	Firmicutes	Clostridia	Clostridiales	Ruminococcaceae	Faecalibacterium	Faecalibacterium prausnitzii
VNAFVPXAQMFGYATDXR	COG0480 Translation elongation factors (GTPases)	J	Bacteria	Firmicutes	Clostridia	Clostridiales	Ruminococcaceae	Faecalibacterium	Faecalibacterium prausnitzii
XASXGXXGNFVGMXTDSR	COG1904 Glucuronate isomerase	G	Bacteria	Firmicutes	Clostridia	Clostridiales	Ruminococcaceae	Faecalibacterium	Faecalibacterium prausnitzii
XASXGXXGNFVGMXTDSR	COG1904 Glucuronate isomerase	G	Bacteria	Firmicutes	Clostridia	Clostridiales	Ruminococcaceae	Faecalibacterium	Faecalibacterium prausnitzii
SXANXGXXGNFVGMXTDSR	COG1904 Glucuronate isomerase	G	Bacteria	Firmicutes	Clostridia	Clostridiales	Ruminococcaceae	Faecalibacterium	Faecalibacterium prausnitzii
DGDAVTSXAYVXETYGXXYNK	COG1653 ABC-type sugar transport system, periplasmic component	G	Bacteria	Firmicutes	Clostridia	Clostridiales	Ruminococcaceae	Faecalibacterium	Faecalibacterium prausnitzii
AGXAAAQAAGAVK	COG1653 ABC-type sugar transport system, periplasmic component	G	Bacteria	Firmicutes	Clostridia	Clostridiales	Ruminococcaceae	Faecalibacterium	Faecalibacterium prausnitzii
KGDTVFDTDEGPR	COG0183 Acetyl-CoA acetyltransferase	I	Bacteria	Firmicutes	Clostridia	Clostridiales	Ruminococcaceae	Faecalibacterium	Faecalibacterium prausnitzii
TGNDAVAEFVGKK	COG1653 ABC-type sugar transport system, periplasmic component	G	Bacteria	Firmicutes	Clostridia	Clostridiales	Ruminococcaceae	Faecalibacterium	Faecalibacterium prausnitzii
XRDHEPAEXAFYSR	COG0423 Glycyl-tRNA synthetase (class II)	J	Bacteria	Firmicutes	Clostridia	Clostridiales	Ruminococcaceae	Faecalibacterium	Faecalibacterium prausnitzii
QXTXDTQDYTNNEK	NO HITS		Bacteria	Firmicutes	Clostridia	Clostridiales	Ruminococcaceae	Faecalibacterium	Faecalibacterium prausnitzii
TGNDAVAEFVGK	COG1653 ABC-type sugar transport system, periplasmic component	G	Bacteria	Firmicutes	Clostridia	Clostridiales	Ruminococcaceae	Faecalibacterium	Faecalibacterium prausnitzii
EXXTAAGYTQDDXK	COG1653 ABC-type sugar transport system, periplasmic component	G	Bacteria	Firmicutes	Clostridia	Clostridiales	Ruminococcaceae	Faecalibacterium	Faecalibacterium prausnitzii
AAAASXDMPXYR	COG0148 Enolase	G	Bacteria	Firmicutes	Clostridia	Clostridiales	Ruminococcaceae	Faecalibacterium	Faecalibacterium prausnitzii
VSYPXDHXQNXVRPXSSAPAAK	COG1866 Phosphoenolpyruvate carboxykinase (ATP)	C	Bacteria	Firmicutes	Clostridia	Clostridiales	Ruminococcaceae	Faecalibacterium	Faecalibacterium prausnitzii
XGDDYYPXHXGAYDR	COG1653 ABC-type sugar transport system, periplasmic component	G	Bacteria	Firmicutes	Clostridia	Clostridiales	Ruminococcaceae	Faecalibacterium	Faecalibacterium prausnitzii
DXGXTDSDXAGQYQYTK	NO HITS		Bacteria	Firmicutes	Clostridia	Clostridiales	Ruminococcaceae	Faecalibacterium	Faecalibacterium prausnitzii
VEQYYWVDYVK	COG1879 ABC-type sugar transport system, periplasmic component	G	Bacteria	Firmicutes	Clostridia	Clostridiales	Ruminococcaceae	Faecalibacterium	Faecalibacterium prausnitzii
SDFXGGQNHXAXFAEAATK	NO HITS		Bacteria	Firmicutes	Clostridia	Clostridiales	Ruminococcaceae	Faecalibacterium	Faecalibacterium prausnitzii
XAGXFEWDSAASK	COG1653 ABC-type sugar transport system, periplasmic component	G	Bacteria	Firmicutes	Clostridia	Clostridiales	Ruminococcaceae	Faecalibacterium	Faecalibacterium prausnitzii
XXVDXXNEGGFSK	COG0059 Ketol-acid reductoisomerase	EH	Bacteria	Firmicutes	Clostridia	Clostridiales	Ruminococcaceae	Faecalibacterium	Faecalibacterium prausnitzii
VYYXNFKPEQDQDWQDXAAEYTK	COG1653 ABC-type sugar transport system, periplasmic component	G	Bacteria	Firmicutes	Clostridia	Clostridiales	Ruminococcaceae	Faecalibacterium	Faecalibacterium prausnitzii
FGGTXANVPAAEXGSXVXK	COG0183 Acetyl-CoA acetyltransferase	I	Bacteria	Firmicutes	Clostridia	Clostridiales	Ruminococcaceae	Faecalibacterium	Faecalibacterium prausnitzii
VTXVYAEVNPXDTXVGQTATHFK	COG1638 TRAP-type C4-dicarboxylate transport system, periplasmic component	G	Bacteria	Firmicutes	Clostridia	Clostridiales	Ruminococcaceae	Faecalibacterium	Faecalibacterium prausnitzii
VXNXWCWNDEFQSR	NO HITS		Bacteria	Firmicutes	Clostridia	Clostridiales	Ruminococcaceae	Faecalibacterium	Faecalibacterium prausnitzii
VXNXWCWNDEFQGR	NO HITS		Bacteria	Firmicutes	Clostridia	Clostridiales	Ruminococcaceae	Faecalibacterium	Faecalibacterium prausnitzii
AHFWNFANSDXAPEFXNEPQEXGXPVR	COG1638 TRAP-type C4-dicarboxylate transport system, periplasmic component	G	Bacteria	Firmicutes	Clostridia	Clostridiales	Ruminococcaceae	Faecalibacterium	Faecalibacterium prausnitzii
YGKDWADPTTSTXNYTADEXAEGXDFXK	COG1653 ABC-type sugar transport system, periplasmic component	G	Bacteria	Firmicutes	Clostridia	Clostridiales	Ruminococcaceae	Faecalibacterium	Faecalibacterium prausnitzii
GXEXAEQXAAAXGGGVVGASR	COG2025 Electron transfer flavoprotein, alpha subunit	C	Bacteria	Firmicutes	Clostridia	Clostridiales	Ruminococcaceae	Faecalibacterium	Faecalibacterium prausnitzii
XASXGXXGNFVGMXTDSR	COG1904 Glucuronate isomerase	G	Bacteria	Firmicutes	Clostridia	Clostridiales	Ruminococcaceae	Faecalibacterium	Faecalibacterium prausnitzii
CVAEAATXXNFXXNEEK	COG1653 ABC-type sugar transport system, periplasmic component	G	Bacteria	Firmicutes	Clostridia	Clostridiales	Ruminococcaceae	Faecalibacterium	Faecalibacterium prausnitzii
XPEEDFVQAVEAXVDVER	COG0115 Branched-chain amino acid aminotransferase/4-amino-4-deoxychorismate lyase	EH	Bacteria	Firmicutes	Clostridia	Clostridiales	Ruminococcaceae	Faecalibacterium	Faecalibacterium prausnitzii
XASXGXXGNFVGMXTDSR	COG1904 Glucuronate isomerase	G	Bacteria	Firmicutes	Clostridia	Clostridiales	Ruminococcaceae	Faecalibacterium	Faecalibacterium prausnitzii
DGDAVTSXAYVXETYGXXYNK	COG1653 ABC-type sugar transport system, periplasmic component	G	Bacteria	Firmicutes	Clostridia	Clostridiales	Ruminococcaceae	Faecalibacterium	Faecalibacterium prausnitzii
XAEVAVETAK	COG0280 Phosphotransacetylase	C	Bacteria	Firmicutes	Clostridia	Clostridiales	Ruminococcaceae	Faecalibacterium	Faecalibacterium prausnitzii
AGXAAAQAAGAVK	COG1653 ABC-type sugar transport system, periplasmic component	G	Bacteria	Firmicutes	Clostridia	Clostridiales	Ruminococcaceae	Faecalibacterium	Faecalibacterium prausnitzii
AGXAAAQAAGAVK	COG1653 ABC-type sugar transport system, periplasmic component	G	Bacteria	Firmicutes	Clostridia	Clostridiales	Ruminococcaceae	Faecalibacterium	Faecalibacterium prausnitzii
AGXAAAQAAGAVK	COG1653 ABC-type sugar transport system, periplasmic component	G	Bacteria	Firmicutes	Clostridia	Clostridiales	Ruminococcaceae	Faecalibacterium	Faecalibacterium prausnitzii
KGDTVFDTDEGPR	COG0183 Acetyl-CoA acetyltransferase	I	Bacteria	Firmicutes	Clostridia	Clostridiales	Ruminococcaceae	Faecalibacterium	Faecalibacterium prausnitzii
KGDTVFDTDEGPR	COG0183 Acetyl-CoA acetyltransferase	I	Bacteria	Firmicutes	Clostridia	Clostridiales	Ruminococcaceae	Faecalibacterium	Faecalibacterium prausnitzii
KGDTVFDTDEGPR	COG0183 Acetyl-CoA acetyltransferase	I	Bacteria	Firmicutes	Clostridia	Clostridiales	Ruminococcaceae	Faecalibacterium	Faecalibacterium prausnitzii
TGNTYVTEHVVGXGK	COG1592 Rubrerythrin	C	Bacteria	Firmicutes	Clostridia	Clostridiales	Ruminococcaceae	Faecalibacterium	Faecalibacterium prausnitzii
TGNTYVTEHVVGXGK	COG1592 Rubrerythrin	C	Bacteria	Firmicutes	Clostridia	Clostridiales	Ruminococcaceae	Faecalibacterium	Faecalibacterium prausnitzii
NXQVSDXXAK	COG1101 ABC-type uncharacterized transport system, ATPase component	R	Bacteria	Firmicutes	Clostridia	Clostridiales	Ruminococcaceae	Faecalibacterium	Faecalibacterium prausnitzii
NPVQVNEAAGFVVNR	COG1250 3-hydroxyacyl-CoA dehydrogenase	I	Bacteria	Firmicutes	Clostridia	Clostridiales	Ruminococcaceae	Faecalibacterium	Faecalibacterium prausnitzii
XXEVXAGCNTPAETVEK	COG1250 3-hydroxyacyl-CoA dehydrogenase	I	Bacteria	Firmicutes	Clostridia	Clostridiales	Ruminococcaceae	Faecalibacterium	Faecalibacterium prausnitzii
SPVQVNEAAGFVVNR	COG1250 3-hydroxyacyl-CoA dehydrogenase	I	Bacteria	Firmicutes	Clostridia	Clostridiales	Ruminococcaceae	Faecalibacterium	Faecalibacterium prausnitzii
TXHPDNVAAGPASYGXTDSXGR	NO COG		Bacteria	Firmicutes	Clostridia	Clostridiales	Ruminococcaceae	Faecalibacterium	Faecalibacterium prausnitzii
YXEXTEGYXNK	COG0822 NifU homolog involved in Fe-S cluster formation	C	Bacteria	Firmicutes	Clostridia	Clostridiales	Ruminococcaceae	Faecalibacterium	Faecalibacterium prausnitzii
GXDFEAXDR	COG0191 Fructose/tagatose bisphosphate aldolase	G	Bacteria	Firmicutes	Clostridia	Clostridiales	Ruminococcaceae	Faecalibacterium	Faecalibacterium prausnitzii
DGAFKDEXVPVVXK	COG0183 Acetyl-CoA acetyltransferase	I	Bacteria	Firmicutes	Clostridia	Clostridiales	Ruminococcaceae	Faecalibacterium	Faecalibacterium prausnitzii
AEGVPQEXVDGXR	COG1592 Rubrerythrin	C	Bacteria	Firmicutes	Clostridia	Clostridiales	Ruminococcaceae	Faecalibacterium	Faecalibacterium prausnitzii
XYESDPFQHXDQXGVGK	COG0574 Phosphoenolpyruvate synthase/pyruvate phosphate dikinase	G	Bacteria	Firmicutes	Clostridia	Clostridiales	Ruminococcaceae	Faecalibacterium	Faecalibacterium prausnitzii
VEQYYWVDYVK	COG1879 ABC-type sugar transport system, periplasmic component	G	Bacteria	Firmicutes	Clostridia	Clostridiales	Ruminococcaceae	Faecalibacterium	Faecalibacterium prausnitzii
XAGXFEWDSAASK	COG1653 ABC-type sugar transport system, periplasmic component	G	Bacteria	Firmicutes	Clostridia	Clostridiales	Ruminococcaceae	Faecalibacterium	Faecalibacterium prausnitzii
FSXAPVAVAXSAK	COG0126 3-phosphoglycerate kinase	G	Bacteria	Firmicutes	Clostridia	Clostridiales	Ruminococcaceae	Faecalibacterium	Faecalibacterium prausnitzii
FSXAPVAVAXSAK	COG0126 3-phosphoglycerate kinase	G	Bacteria	Firmicutes	Clostridia	Clostridiales	Ruminococcaceae	Faecalibacterium	Faecalibacterium prausnitzii
XXVDXXNEGGFSK	COG0059 Ketol-acid reductoisomerase	EH	Bacteria	Firmicutes	Clostridia	Clostridiales	Ruminococcaceae	Faecalibacterium	Faecalibacterium prausnitzii
EXSPXAPXHNPAGXXGXEAAR	COG0282 Acetate kinase	C	Bacteria	Firmicutes	Clostridia	Clostridiales	Ruminococcaceae	Faecalibacterium	Faecalibacterium prausnitzii
SQTAFSEDGXPXGAGXDDXGK	COG0822 NifU homolog involved in Fe-S cluster formation	C	Bacteria	Firmicutes	Clostridia	Clostridiales	Ruminococcaceae	Faecalibacterium	Faecalibacterium prausnitzii
FGGTXANVPAAEXGSXVXK	COG0183 Acetyl-CoA acetyltransferase	I	Bacteria	Firmicutes	Clostridia	Clostridiales	Ruminococcaceae	Faecalibacterium	Faecalibacterium prausnitzii
SXDFAEAGDNXGAXXR	COG0050 GTPases - translation elongation factors	J	Bacteria	Firmicutes	Clostridia	Clostridiales	Ruminococcaceae	Faecalibacterium	Faecalibacterium prausnitzii
GXEXAEQXAAAXGGGVVGASR	COG2025 Electron transfer flavoprotein, alpha subunit	C	Bacteria	Firmicutes	Clostridia	Clostridiales	Ruminococcaceae	Faecalibacterium	Faecalibacterium prausnitzii
SGXTDXXXXXGR	COG1210 UDP-glucose pyrophosphorylase	M	Bacteria	Firmicutes	Clostridia	Clostridiales	Ruminococcaceae	Faecalibacterium	Faecalibacterium prausnitzii
GXTDAAECAAAXGEGXEAFTXPGSVAEQR	NO COG		Bacteria	Firmicutes	Clostridia	Clostridiales	Ruminococcaceae	Faecalibacterium	Faecalibacterium prausnitzii
DVNKGXEXAEQXAAAXGGGVVGASR	COG2025 Electron transfer flavoprotein, alpha subunit	C	Bacteria	Firmicutes	Clostridia	Clostridiales	Ruminococcaceae	Faecalibacterium	Faecalibacterium prausnitzii
AGDXEGAQAAQDAXAXXQQTFK	COG0329 Dihydrodipicolinate synthase/N-acetylneuraminate lyase	EM	Bacteria	Firmicutes	Clostridia	Clostridiales	Ruminococcaceae	Faecalibacterium	Faecalibacterium prausnitzii
XGXASQAXGXAEGAXQETVAYVK	COG1960 Acyl-CoA dehydrogenases	I	Bacteria	Firmicutes	Clostridia	Clostridiales	Ruminococcaceae	Faecalibacterium	Faecalibacterium prausnitzii
XASXGXXGNFVGMXTDSR	COG1904 Glucuronate isomerase	G	Bacteria	Firmicutes	Clostridia	Clostridiales	Ruminococcaceae	Faecalibacterium	Faecalibacterium prausnitzii
KEDVQCSXTGNSTNPVR	NO COG		Bacteria	Firmicutes	Clostridia	Clostridiales	Ruminococcaceae	Faecalibacterium	Faecalibacterium prausnitzii
AGXAAAQAAGAVK	COG1653 ABC-type sugar transport system, periplasmic component	G	Bacteria	Firmicutes	Clostridia	Clostridiales	Ruminococcaceae	Faecalibacterium	Faecalibacterium prausnitzii
AGXAAAQAAGAVK	COG1653 ABC-type sugar transport system, periplasmic component	G	Bacteria	Firmicutes	Clostridia	Clostridiales	Ruminococcaceae	Faecalibacterium	Faecalibacterium prausnitzii
KGDTVFDTDEGPR	COG0183 Acetyl-CoA acetyltransferase	I	Bacteria	Firmicutes	Clostridia	Clostridiales	Ruminococcaceae	Faecalibacterium	Faecalibacterium prausnitzii
TGNTYVTEHVVGXGK	COG1592 Rubrerythrin	C	Bacteria	Firmicutes	Clostridia	Clostridiales	Ruminococcaceae	Faecalibacterium	Faecalibacterium prausnitzii
TGNTYVTEHVVGXGK	COG1592 Rubrerythrin	C	Bacteria	Firmicutes	Clostridia	Clostridiales	Ruminococcaceae	Faecalibacterium	Faecalibacterium prausnitzii
NPVQVNEAAGFVVNR	COG1250 3-hydroxyacyl-CoA dehydrogenase	I	Bacteria	Firmicutes	Clostridia	Clostridiales	Ruminococcaceae	Faecalibacterium	Faecalibacterium prausnitzii
XXEVXAGCNTPAETVEK	COG1250 3-hydroxyacyl-CoA dehydrogenase	I	Bacteria	Firmicutes	Clostridia	Clostridiales	Ruminococcaceae	Faecalibacterium	Faecalibacterium prausnitzii
SPVQVNEAAGFVVNR	COG1250 3-hydroxyacyl-CoA dehydrogenase	I	Bacteria	Firmicutes	Clostridia	Clostridiales	Ruminococcaceae	Faecalibacterium	Faecalibacterium prausnitzii
TXHPDNVAAGPASYGXTDSXGR	NO COG		Bacteria	Firmicutes	Clostridia	Clostridiales	Ruminococcaceae	Faecalibacterium	Faecalibacterium prausnitzii
YXEXTEGYXNK	COG0822 NifU homolog involved in Fe-S cluster formation	C	Bacteria	Firmicutes	Clostridia	Clostridiales	Ruminococcaceae	Faecalibacterium	Faecalibacterium prausnitzii
GXDFEAXDR	COG0191 Fructose/tagatose bisphosphate aldolase	G	Bacteria	Firmicutes	Clostridia	Clostridiales	Ruminococcaceae	Faecalibacterium	Faecalibacterium prausnitzii
DGAFKDEXVPVVXK	COG0183 Acetyl-CoA acetyltransferase	I	Bacteria	Firmicutes	Clostridia	Clostridiales	Ruminococcaceae	Faecalibacterium	Faecalibacterium prausnitzii
XVYXGNXGXK	COG2222 Predicted phosphosugar isomerases	M	Bacteria	Firmicutes	Clostridia	Clostridiales	Ruminococcaceae	Faecalibacterium	Faecalibacterium prausnitzii
XTEEVGHXNXXVNNAGXXK	COG1028 Dehydrogenases with different specificities (related to short-chain alcohol dehydrogenases)	IQR	Bacteria	Firmicutes	Clostridia	Clostridiales	Ruminococcaceae	Faecalibacterium	Faecalibacterium prausnitzii
XAGXFEWDSAASK	COG1653 ABC-type sugar transport system, periplasmic component	G	Bacteria	Firmicutes	Clostridia	Clostridiales	Ruminococcaceae	Faecalibacterium	Faecalibacterium prausnitzii
FSXAPVAVAXSAK	COG0126 3-phosphoglycerate kinase	G	Bacteria	Firmicutes	Clostridia	Clostridiales	Ruminococcaceae	Faecalibacterium	Faecalibacterium prausnitzii
XXVDXXNEGGFSK	COG0059 Ketol-acid reductoisomerase	EH	Bacteria	Firmicutes	Clostridia	Clostridiales	Ruminococcaceae	Faecalibacterium	Faecalibacterium prausnitzii
EXSPXAPXHNPAGXXGXEAAR	COG0282 Acetate kinase	C	Bacteria	Firmicutes	Clostridia	Clostridiales	Ruminococcaceae	Faecalibacterium	Faecalibacterium prausnitzii
APXPXVDXXK	COG0524 Sugar kinases, ribokinase family	G	Bacteria	Firmicutes	Clostridia	Clostridiales	Ruminococcaceae	Faecalibacterium	Faecalibacterium prausnitzii
VYYXNFKPEQDQDWQDXAAEYTK	COG1653 ABC-type sugar transport system, periplasmic component	G	Bacteria	Firmicutes	Clostridia	Clostridiales	Ruminococcaceae	Faecalibacterium	Faecalibacterium prausnitzii
FGGTXANVPAAEXGSXVXK	COG0183 Acetyl-CoA acetyltransferase	I	Bacteria	Firmicutes	Clostridia	Clostridiales	Ruminococcaceae	Faecalibacterium	Faecalibacterium prausnitzii
DGXVTAGNSSAXNDGAAAXVXMSEEK	COG0183 Acetyl-CoA acetyltransferase	I	Bacteria	Firmicutes	Clostridia	Clostridiales	Ruminococcaceae	Faecalibacterium	Faecalibacterium prausnitzii
GXEXAEQXAAAXGGGVVGASR	COG2025 Electron transfer flavoprotein, alpha subunit	C	Bacteria	Firmicutes	Clostridia	Clostridiales	Ruminococcaceae	Faecalibacterium	Faecalibacterium prausnitzii
EXGVKPXATWVAGAXAGVEPEVMGXGPXAATK	COG0183 Acetyl-CoA acetyltransferase	I	Bacteria	Firmicutes	Clostridia	Clostridiales	Ruminococcaceae	Faecalibacterium	Faecalibacterium prausnitzii
XASXGXXGNFVGMXTDSR	COG1904 Glucuronate isomerase	G	Bacteria	Firmicutes	Clostridia	Clostridiales	Ruminococcaceae	Faecalibacterium	Faecalibacterium prausnitzii
XASXGXXGNFVGMXTDSR	COG1904 Glucuronate isomerase	G	Bacteria	Firmicutes	Clostridia	Clostridiales	Ruminococcaceae	Faecalibacterium	Faecalibacterium prausnitzii
GXEXAEQXAAAXGGGVVGASR	COG2025 Electron transfer flavoprotein, alpha subunit	C	Bacteria	Firmicutes	Clostridia	Clostridiales	Ruminococcaceae	Faecalibacterium	Faecalibacterium prausnitzii
DGDAVTSXAYVXETYGXXYNK	COG1653 ABC-type sugar transport system, periplasmic component	G	Bacteria	Firmicutes	Clostridia	Clostridiales	Ruminococcaceae	Faecalibacterium	Faecalibacterium prausnitzii
GAPXDXEVANVVASVMK	COG3968 Uncharacterized protein related to glutamine synthetase	R	Bacteria	Firmicutes	Clostridia	Clostridiales	Ruminococcaceae	Faecalibacterium	Faecalibacterium prausnitzii
DGDAVTSXAYVXETYGXXYNK	COG1653 ABC-type sugar transport system, periplasmic component	G	Bacteria	Firmicutes	Clostridia	Clostridiales	Ruminococcaceae	Faecalibacterium	Faecalibacterium prausnitzii
NKHVSXGAGANVK	COG0366 Glycosidases	G	Bacteria	Firmicutes	Clostridia	Clostridiales	Ruminococcaceae	Ruminococcus	Ruminococcus bromii
NKHVSXGAGANVK	COG0366 Glycosidases	G	Bacteria	Firmicutes	Clostridia	Clostridiales	Ruminococcaceae	Ruminococcus	Ruminococcus bromii
XVRPXSSAPAAK	COG1866 Phosphoenolpyruvate carboxykinase (ATP)	C	Bacteria	Firmicutes	Clostridia	Clostridiales	Ruminococcaceae	Ruminococcus	Ruminococcus obeum
TXVDTAHEHGXR	COG0366 Glycosidases	G	Bacteria	Firmicutes	Clostridia	Clostridiales	Ruminococcaceae	Ruminococcus	Ruminococcus bromii
VVAQNPNEPEFHQAVK	COG0334 Glutamate dehydrogenase/leucine dehydrogenase	E	Bacteria	Firmicutes	Clostridia	Clostridiales	Ruminococcaceae	Ruminococcus	Ruminococcus sp.
KXEDXNSFEK	COG1653 ABC-type sugar transport system, periplasmic component	G	Bacteria	Firmicutes	Clostridia	Clostridiales	Ruminococcaceae	Ruminococcus	Ruminococcus bromii
XRNVYEGVXTGK	COG0334 Glutamate dehydrogenase/leucine dehydrogenase	E	Bacteria	Firmicutes	Clostridia	Clostridiales	Ruminococcaceae	Ruminococcus	Ruminococcus bromii
XHPSVNXGVXK	COG0334 Glutamate dehydrogenase/leucine dehydrogenase	E	Bacteria	Firmicutes	Clostridia	Clostridiales	Ruminococcaceae	Ruminococcus	Ruminococcus bromii
XAAVEDXYVAHTK	COG4822 Cobalamin biosynthesis protein CbiK, Co2+ chelatase	H	Bacteria	Firmicutes	Clostridia	Clostridiales	Ruminococcaceae	Ruminococcus	Ruminococcus sp.
SGXXFAPGK	COG0334 Glutamate dehydrogenase/leucine dehydrogenase	E	Bacteria	Firmicutes	Clostridia	Clostridiales	Ruminococcaceae	Ruminococcus	Ruminococcus bromii
KYGHEGDYVVGANXAGFEK	COG0334 Glutamate dehydrogenase/leucine dehydrogenase	E	Bacteria	Firmicutes	Clostridia	Clostridiales	Ruminococcaceae	Ruminococcus	Ruminococcus bromii
XMEVXTPSPYR	COG2265 SAM-dependent methyltransferases related to tRNA (uracil-5-)-methyltransferase	J	Bacteria	Firmicutes	Clostridia	Clostridiales	Ruminococcaceae	Ruminococcus	Ruminococcus sp.
XXFGWVATK	COG1621 Beta-fructosidases (levanase/invertase)	G	Bacteria	Firmicutes	Clostridia	Clostridiales	Ruminococcaceae	Ruminococcus	Ruminococcus sp.
SWXXGXKEYR	COG2160 L-arabinose isomerase	G	Bacteria	Firmicutes	Clostridia	Clostridiales	Ruminococcaceae	Ruminococcus
XXXXDKDETXAQVXR	COG1529 Aerobic-type carbon monoxide dehydrogenase, large subunit CoxL/CutL homologs	C	Bacteria	Firmicutes	Clostridia	Clostridiales	Ruminococcaceae	Ruminococcus
XGDWWYHXVTEYSDR	COG1621 Beta-fructosidases (levanase/invertase)	G	Bacteria	Firmicutes	Clostridia	Clostridiales	Ruminococcaceae	Ruminococcus	Ruminococcus sp.
GXXDAXXDGSXTK	COG1866 Phosphoenolpyruvate carboxykinase (ATP)	C	Bacteria	Firmicutes	Clostridia	Clostridiales	Ruminococcaceae	Ruminococcus	Ruminococcus bromii
NANEPEFXQAATEVXTSXEPVFEQNPK	COG0334 Glutamate dehydrogenase/leucine dehydrogenase	E	Bacteria	Firmicutes	Clostridia	Clostridiales	Ruminococcaceae	Ruminococcus	Ruminococcus bromii
NKHVSXGAGANVK	COG0366 Glycosidases	G	Bacteria	Firmicutes	Clostridia	Clostridiales	Ruminococcaceae	Ruminococcus	Ruminococcus bromii
NKHVSXGAGANVK	COG0366 Glycosidases	G	Bacteria	Firmicutes	Clostridia	Clostridiales	Ruminococcaceae	Ruminococcus	Ruminococcus bromii
XVRPXSSAPAAK	COG1866 Phosphoenolpyruvate carboxykinase (ATP)	C	Bacteria	Firmicutes	Clostridia	Clostridiales	Ruminococcaceae	Ruminococcus	Ruminococcus obeum
KYTDETGVEVTVK	COG1653 ABC-type sugar transport system, periplasmic component	G	Bacteria	Firmicutes	Clostridia	Clostridiales	Ruminococcaceae	Ruminococcus	Ruminococcus bromii
KXEDXNSFEK	COG1653 ABC-type sugar transport system, periplasmic component	G	Bacteria	Firmicutes	Clostridia	Clostridiales	Ruminococcaceae	Ruminococcus	Ruminococcus bromii
XRNVYEGVXTGK	COG0334 Glutamate dehydrogenase/leucine dehydrogenase	E	Bacteria	Firmicutes	Clostridia	Clostridiales	Ruminococcaceae	Ruminococcus	Ruminococcus bromii
SPEEYWAQKPGVQYQQR	COG0366 Glycosidases	G	Bacteria	Firmicutes	Clostridia	Clostridiales	Ruminococcaceae	Ruminococcus	Ruminococcus bromii
XAAVEDXYVAHTK	COG4822 Cobalamin biosynthesis protein CbiK, Co2+ chelatase	H	Bacteria	Firmicutes	Clostridia	Clostridiales	Ruminococcaceae	Ruminococcus	Ruminococcus sp.
KYGHEGDYVVGANXAGFEK	COG0334 Glutamate dehydrogenase/leucine dehydrogenase	E	Bacteria	Firmicutes	Clostridia	Clostridiales	Ruminococcaceae	Ruminococcus	Ruminococcus bromii
VYYXNFKPEQDEAWQNXAK	COG1653 ABC-type sugar transport system, periplasmic component	G	Bacteria	Firmicutes	Clostridia	Clostridiales	Ruminococcaceae	Ruminococcus	Ruminococcus obeum
SWXXGXKEYR	COG2160 L-arabinose isomerase	G	Bacteria	Firmicutes	Clostridia	Clostridiales	Ruminococcaceae	Ruminococcus
XXXXDKDETXAQVXR	COG1529 Aerobic-type carbon monoxide dehydrogenase, large subunit CoxL/CutL homologs	C	Bacteria	Firmicutes	Clostridia	Clostridiales	Ruminococcaceae	Ruminococcus
TPEEFXSXXDAR	COG1299 Phosphotransferase system, fructose-specific IIC component	G	Bacteria	Firmicutes	Clostridia	Clostridiales	Ruminococcaceae	Ruminococcus	Ruminococcus bromii
ASADDQAATXEFXNWCVTNK	COG1653 ABC-type sugar transport system, periplasmic component	G	Bacteria	Firmicutes	Clostridia	Clostridiales	Ruminococcaceae	Ruminococcus	Ruminococcus bromii
XGDWWYHXVTEYSDR	COG1621 Beta-fructosidases (levanase/invertase)	G	Bacteria	Firmicutes	Clostridia	Clostridiales	Ruminococcaceae	Ruminococcus	Ruminococcus sp.
GXXDAXXDGSXTK	COG1866 Phosphoenolpyruvate carboxykinase (ATP)	C	Bacteria	Firmicutes	Clostridia	Clostridiales	Ruminococcaceae	Ruminococcus	Ruminococcus bromii
VYNEPNEFFGGQPXFSTXVEYSSHXPEFTK	COG1653 ABC-type sugar transport system, periplasmic component	G	Bacteria	Firmicutes	Clostridia	Clostridiales	Ruminococcaceae	Ruminococcus	Ruminococcus sp.
TDXXDEAGYTXDDXTDXTWSK	COG1653 ABC-type sugar transport system, periplasmic component	G	Bacteria	Firmicutes	Clostridia	Clostridiales	Ruminococcaceae	Ruminococcus	Ruminococcus sp.
GETTEEXVDAXXAEXR	COG1454 Alcohol dehydrogenase, class IV	C	Bacteria	Firmicutes	Clostridia	Clostridiales	Ruminococcaceae	Ruminococcus	Ruminococcus bromii
NANEPEFXQAATEVXTSXEPVFEQNPK	COG0334 Glutamate dehydrogenase/leucine dehydrogenase	E	Bacteria	Firmicutes	Clostridia	Clostridiales	Ruminococcaceae	Ruminococcus	Ruminococcus bromii
XVRPXSSAPAAK	COG1866 Phosphoenolpyruvate carboxykinase (ATP)	C	Bacteria	Firmicutes	Clostridia	Clostridiales	Ruminococcaceae	Ruminococcus	Ruminococcus obeum
VNVYVQSSDNSTXNK	NO HITS		Bacteria	Firmicutes	Clostridia	Clostridiales	Ruminococcaceae	Ruminococcus	Ruminococcus bromii
XSATSGVAFGR	COG0366 Glycosidases	G	Bacteria	Firmicutes	Clostridia	Clostridiales	Ruminococcaceae	Ruminococcus	Ruminococcus bromii
SPEEYWAQKPGVQYQQR	COG0366 Glycosidases	G	Bacteria	Firmicutes	Clostridia	Clostridiales	Ruminococcaceae	Ruminococcus	Ruminococcus bromii
SGXXFAPGK	COG0334 Glutamate dehydrogenase/leucine dehydrogenase	E	Bacteria	Firmicutes	Clostridia	Clostridiales	Ruminococcaceae	Ruminococcus	Ruminococcus bromii
MTNXGGNVYQYTASK	NO HITS		Bacteria	Firmicutes	Clostridia	Clostridiales	Ruminococcaceae	Ruminococcus	Ruminococcus bromii
SAGNAFFEXAAK	COG1879 ABC-type sugar transport system, periplasmic component	G	Bacteria	Firmicutes	Clostridia	Clostridiales	Ruminococcaceae	Ruminococcus	Ruminococcus obeum
TNQWSVYDTSPXQVK	NO HITS		Bacteria	Firmicutes	Clostridia	Clostridiales	Ruminococcaceae	Ruminococcus	Ruminococcus bromii
VYYXNFKPEQDEAWQNXAK	COG1653 ABC-type sugar transport system, periplasmic component	G	Bacteria	Firmicutes	Clostridia	Clostridiales	Ruminococcaceae	Ruminococcus	Ruminococcus obeum
XXFGWVATK	COG1621 Beta-fructosidases (levanase/invertase)	G	Bacteria	Firmicutes	Clostridia	Clostridiales	Ruminococcaceae	Ruminococcus	Ruminococcus sp.
SWXXGXKEYR	COG2160 L-arabinose isomerase	G	Bacteria	Firmicutes	Clostridia	Clostridiales	Ruminococcaceae	Ruminococcus
AGXDPSTXTGPDAXKEAFETXDSK	COG1653 ABC-type sugar transport system, periplasmic component	G	Bacteria	Firmicutes	Clostridia	Clostridiales	Ruminococcaceae	Ruminococcus	Ruminococcus sp.
GXXDAXXDGSXTK	COG1866 Phosphoenolpyruvate carboxykinase (ATP)	C	Bacteria	Firmicutes	Clostridia	Clostridiales	Ruminococcaceae	Ruminococcus	Ruminococcus bromii
KXPYFDFEVPTEXPGVDPAXXDPR	COG1866 Phosphoenolpyruvate carboxykinase (ATP)	C	Bacteria	Firmicutes	Clostridia	Clostridiales	Ruminococcaceae	Ruminococcus	Ruminococcus albus
DXGNXQESXXPTQYXXDTYGXK	COG0366 Glycosidases	G	Bacteria	Firmicutes	Clostridia	Clostridiales	Ruminococcaceae	Ruminococcus	Ruminococcus bromii
GETTEEXVDAXXAEXR	COG1454 Alcohol dehydrogenase, class IV	C	Bacteria	Firmicutes	Clostridia	Clostridiales	Ruminococcaceae	Ruminococcus	Ruminococcus bromii
NANEPEFXQAATEVXTSXEPVFEQNPK	COG0334 Glutamate dehydrogenase/leucine dehydrogenase	E	Bacteria	Firmicutes	Clostridia	Clostridiales	Ruminococcaceae	Ruminococcus	Ruminococcus bromii
XAAXEGGTAAXAVASGAAAVSYAXQAXAK	COG2873 O-acetylhomoserine sulfhydrylase	E	Bacteria	Firmicutes	Clostridia	Clostridiales	Ruminococcaceae	Ruminococcus	Ruminococcus bromii
XVRPXSSAPAAK	COG1866 Phosphoenolpyruvate carboxykinase (ATP)	C	Bacteria	Firmicutes	Clostridia	Clostridiales	Ruminococcaceae	Ruminococcus	Ruminococcus obeum
VXXDNNPSPTR	COG1529 Aerobic-type carbon monoxide dehydrogenase, large subunit CoxL/CutL homologs	C	Bacteria	Firmicutes	Clostridia	Clostridiales	Ruminococcaceae	Ruminococcus
VNVYVQSSDNSTXNK	NO HITS		Bacteria	Firmicutes	Clostridia	Clostridiales	Ruminococcaceae	Ruminococcus	Ruminococcus bromii
XHPSVNXGVXK	COG0334 Glutamate dehydrogenase/leucine dehydrogenase	E	Bacteria	Firmicutes	Clostridia	Clostridiales	Ruminococcaceae	Ruminococcus	Ruminococcus bromii
SPEEYWAQKPGVQYQQR	COG0366 Glycosidases	G	Bacteria	Firmicutes	Clostridia	Clostridiales	Ruminococcaceae	Ruminococcus	Ruminococcus bromii
SGXXFAPGK	COG0334 Glutamate dehydrogenase/leucine dehydrogenase	E	Bacteria	Firmicutes	Clostridia	Clostridiales	Ruminococcaceae	Ruminococcus	Ruminococcus bromii
MXEXXQADGK	COG1879 ABC-type sugar transport system, periplasmic component	G	Bacteria	Firmicutes	Clostridia	Clostridiales	Ruminococcaceae	Ruminococcus
FSVTNAQGGTSTXSDFSSAK	NO HITS		Bacteria	Firmicutes	Clostridia	Clostridiales	Ruminococcaceae	Ruminococcus	Ruminococcus bromii
GXWQXTTMPK	COG1653 ABC-type sugar transport system, periplasmic component	G	Bacteria	Firmicutes	Clostridia	Clostridiales	Ruminococcaceae	Ruminococcus	Ruminococcus sp.
VYYXNFKPEQDEAWQNXAK	COG1653 ABC-type sugar transport system, periplasmic component	G	Bacteria	Firmicutes	Clostridia	Clostridiales	Ruminococcaceae	Ruminococcus	Ruminococcus obeum
XXFGWVATK	COG1621 Beta-fructosidases (levanase/invertase)	G	Bacteria	Firmicutes	Clostridia	Clostridiales	Ruminococcaceae	Ruminococcus	Ruminococcus sp.
SWXXGXKEYR	COG2160 L-arabinose isomerase	G	Bacteria	Firmicutes	Clostridia	Clostridiales	Ruminococcaceae	Ruminococcus
AGXDPSTXTGPDAXKEAFETXDSK	COG1653 ABC-type sugar transport system, periplasmic component	G	Bacteria	Firmicutes	Clostridia	Clostridiales	Ruminococcaceae	Ruminococcus	Ruminococcus sp.
FGFXDKAVAYXK	NO HITS		Bacteria	Firmicutes	Clostridia	Clostridiales	Ruminococcaceae	Ruminococcus	Ruminococcus sp.
GXXDAXXDGSXTK	COG1866 Phosphoenolpyruvate carboxykinase (ATP)	C	Bacteria	Firmicutes	Clostridia	Clostridiales	Ruminococcaceae	Ruminococcus	Ruminococcus bromii
AVANEAVVTXDXAEAMXK	COG4213 ABC-type xylose transport system, periplasmic component	G	Bacteria	Firmicutes	Clostridia	Clostridiales	Ruminococcaceae	Ruminococcus	Ruminococcus obeum
DXGNXQESXXPTQYXXDTYGXK	COG0366 Glycosidases	G	Bacteria	Firmicutes	Clostridia	Clostridiales	Ruminococcaceae	Ruminococcus	Ruminococcus bromii
NANEPEFXQAATEVXTSXEPVFEQNPK	COG0334 Glutamate dehydrogenase/leucine dehydrogenase	E	Bacteria	Firmicutes	Clostridia	Clostridiales	Ruminococcaceae	Ruminococcus	Ruminococcus bromii
XAAXEGGTAAXAVASGAAAVSYAXQAXAK	COG2873 O-acetylhomoserine sulfhydrylase	E	Bacteria	Firmicutes	Clostridia	Clostridiales	Ruminococcaceae	Ruminococcus	Ruminococcus bromii
XVRPXSSAPAAK	COG1866 Phosphoenolpyruvate carboxykinase (ATP)	C	Bacteria	Firmicutes	Clostridia	Clostridiales	Ruminococcaceae	Ruminococcus	Ruminococcus obeum
VNVYVQSSDNSTXNK	NO HITS		Bacteria	Firmicutes	Clostridia	Clostridiales	Ruminococcaceae	Ruminococcus	Ruminococcus bromii
XHPSVNXGVXK	COG0334 Glutamate dehydrogenase/leucine dehydrogenase	E	Bacteria	Firmicutes	Clostridia	Clostridiales	Ruminococcaceae	Ruminococcus	Ruminococcus bromii
MTNXGGNVYQYTASK	NO HITS		Bacteria	Firmicutes	Clostridia	Clostridiales	Ruminococcaceae	Ruminococcus	Ruminococcus bromii
FSVTNAQGGTSTXSDFSSAK	NO HITS		Bacteria	Firmicutes	Clostridia	Clostridiales	Ruminococcaceae	Ruminococcus	Ruminococcus bromii
AEAQGFEVFTAAEAAK	COG0059 Ketol-acid reductoisomerase	EH	Bacteria	Firmicutes	Clostridia	Clostridiales	Ruminococcaceae	Ruminococcus	Ruminococcus gnavus
SGQTEFEQVATANWDSAK	COG4213 ABC-type xylose transport system, periplasmic component	G	Bacteria	Firmicutes	Clostridia	Clostridiales	Ruminococcaceae	Ruminococcus	Ruminococcus sp.
SWXXGXKEYR	COG2160 L-arabinose isomerase	G	Bacteria	Firmicutes	Clostridia	Clostridiales	Ruminococcaceae	Ruminococcus
TPEEFXSXXDAR	COG1299 Phosphotransferase system, fructose-specific IIC component	G	Bacteria	Firmicutes	Clostridia	Clostridiales	Ruminococcaceae	Ruminococcus	Ruminococcus bromii
GTFQSXDVANXASGFASGK	NO HITS		Bacteria	Firmicutes	Clostridia	Clostridiales	Ruminococcaceae	Ruminococcus	Ruminococcus bromii
KADXXYGFXDSSEXFK	COG1932 Phosphoserine aminotransferase	HE	Bacteria	Firmicutes	Clostridia	Clostridiales	Ruminococcaceae	Ruminococcus	Ruminococcus bromii
FGFXDKAVAYXK	NO HITS		Bacteria	Firmicutes	Clostridia	Clostridiales	Ruminococcaceae	Ruminococcus	Ruminococcus sp.
GXXDAXXDGSXTK	COG1866 Phosphoenolpyruvate carboxykinase (ATP)	C	Bacteria	Firmicutes	Clostridia	Clostridiales	Ruminococcaceae	Ruminococcus	Ruminococcus bromii
XAAXEGGTAAXAVASGAAAVSYAXQAXAK	COG2873 O-acetylhomoserine sulfhydrylase	E	Bacteria	Firmicutes	Clostridia	Clostridiales	Ruminococcaceae	Ruminococcus	Ruminococcus bromii
NANEPEFXQAATEVXTSXEPVFEQNPK	COG0334 Glutamate dehydrogenase/leucine dehydrogenase	E	Bacteria	Firmicutes	Clostridia	Clostridiales	Ruminococcaceae	Ruminococcus	Ruminococcus bromii
XVRPXSSAPAAK	COG1866 Phosphoenolpyruvate carboxykinase (ATP)	C	Bacteria	Firmicutes	Clostridia	Clostridiales	Ruminococcaceae	Ruminococcus	Ruminococcus obeum
VNVYVQSSDNSTXNK	NO HITS		Bacteria	Firmicutes	Clostridia	Clostridiales	Ruminococcaceae	Ruminococcus	Ruminococcus bromii
SPEEYWAQKPGVQYQQR	COG0366 Glycosidases	G	Bacteria	Firmicutes	Clostridia	Clostridiales	Ruminococcaceae	Ruminococcus	Ruminococcus bromii
SGXXFAPGK	COG0334 Glutamate dehydrogenase/leucine dehydrogenase	E	Bacteria	Firmicutes	Clostridia	Clostridiales	Ruminococcaceae	Ruminococcus	Ruminococcus bromii
MTNXGGNVYQYTASK	NO HITS		Bacteria	Firmicutes	Clostridia	Clostridiales	Ruminococcaceae	Ruminococcus	Ruminococcus bromii
FSVTNAQGGTSTXSDFSSAK	NO HITS		Bacteria	Firmicutes	Clostridia	Clostridiales	Ruminococcaceae	Ruminococcus	Ruminococcus bromii
SGQTEFEQVATANWDSAK	COG4213 ABC-type xylose transport system, periplasmic component	G	Bacteria	Firmicutes	Clostridia	Clostridiales	Ruminococcaceae	Ruminococcus	Ruminococcus sp.
XXFGWVATK	COG1621 Beta-fructosidases (levanase/invertase)	G	Bacteria	Firmicutes	Clostridia	Clostridiales	Ruminococcaceae	Ruminococcus	Ruminococcus sp.
VYYXNFKPEQDEAWQNXAK	COG1653 ABC-type sugar transport system, periplasmic component	G	Bacteria	Firmicutes	Clostridia	Clostridiales	Ruminococcaceae	Ruminococcus	Ruminococcus obeum
SWXXGXKEYR	COG2160 L-arabinose isomerase	G	Bacteria	Firmicutes	Clostridia	Clostridiales	Ruminococcaceae	Ruminococcus
TGTSAXADDMGFVXPFK	COG1653 ABC-type sugar transport system, periplasmic component	G	Bacteria	Firmicutes	Clostridia	Clostridiales	Ruminococcaceae	Ruminococcus	Ruminococcus bromii
EGXAQNYTGQVFADYASGSXDEAGFVK	COG1653 ABC-type sugar transport system, periplasmic component	G	Bacteria	Firmicutes	Clostridia	Clostridiales	Ruminococcaceae	Ruminococcus	Ruminococcus sp.
EFEPDWXVAMGGGSPXDAAK	COG1454 Alcohol dehydrogenase, class IV	C	Bacteria	Firmicutes	Clostridia	Clostridiales	Ruminococcaceae	Ruminococcus
TXPHFNFEVPTEXPGVDSGXXDPR	COG1866 Phosphoenolpyruvate carboxykinase (ATP)	C	Bacteria	Firmicutes	Clostridia	Clostridiales	Ruminococcaceae	Ruminococcus	Ruminococcus bromii
AGXDPSTXTGPDAXKEAFETXDSK	COG1653 ABC-type sugar transport system, periplasmic component	G	Bacteria	Firmicutes	Clostridia	Clostridiales	Ruminococcaceae	Ruminococcus	Ruminococcus sp.
FGFXDKAVAYXK	NO HITS		Bacteria	Firmicutes	Clostridia	Clostridiales	Ruminococcaceae	Ruminococcus	Ruminococcus sp.
GXXDAXXDGSXTK	COG1866 Phosphoenolpyruvate carboxykinase (ATP)	C	Bacteria	Firmicutes	Clostridia	Clostridiales	Ruminococcaceae	Ruminococcus	Ruminococcus bromii
KXPYFDFEVPTEXPGVDPAXXDPR	COG1866 Phosphoenolpyruvate carboxykinase (ATP)	C	Bacteria	Firmicutes	Clostridia	Clostridiales	Ruminococcaceae	Ruminococcus	Ruminococcus albus
AVANEAVVTXDXAEAMXK	COG4213 ABC-type xylose transport system, periplasmic component	G	Bacteria	Firmicutes	Clostridia	Clostridiales	Ruminococcaceae	Ruminococcus	Ruminococcus obeum
VYNEPNEFFGGQPXFSTXVEYSSHXPEFTK	COG1653 ABC-type sugar transport system, periplasmic component	G	Bacteria	Firmicutes	Clostridia	Clostridiales	Ruminococcaceae	Ruminococcus	Ruminococcus sp.
XAAXEGGTAAXAVASGAAAVSYAXQAXAK	COG2873 O-acetylhomoserine sulfhydrylase	E	Bacteria	Firmicutes	Clostridia	Clostridiales	Ruminococcaceae	Ruminococcus	Ruminococcus bromii
NANEPEFXQAATEVXTSXEPVFEQNPK	COG0334 Glutamate dehydrogenase/leucine dehydrogenase	E	Bacteria	Firmicutes	Clostridia	Clostridiales	Ruminococcaceae	Ruminococcus	Ruminococcus bromii
XVRPXSSAPAAK	COG1866 Phosphoenolpyruvate carboxykinase (ATP)	C	Bacteria	Firmicutes	Clostridia	Clostridiales	Ruminococcaceae	Ruminococcus	Ruminococcus obeum
VXXDNNPSPTR	COG1529 Aerobic-type carbon monoxide dehydrogenase, large subunit CoxL/CutL homologs	C	Bacteria	Firmicutes	Clostridia	Clostridiales	Ruminococcaceae	Ruminococcus
XHPSVNXGVXK	COG0334 Glutamate dehydrogenase/leucine dehydrogenase	E	Bacteria	Firmicutes	Clostridia	Clostridiales	Ruminococcaceae	Ruminococcus	Ruminococcus bromii
SGXXFAPGK	COG0334 Glutamate dehydrogenase/leucine dehydrogenase	E	Bacteria	Firmicutes	Clostridia	Clostridiales	Ruminococcaceae	Ruminococcus	Ruminococcus bromii
MTNXGGNVYQYTASK	NO HITS		Bacteria	Firmicutes	Clostridia	Clostridiales	Ruminococcaceae	Ruminococcus	Ruminococcus bromii
GQEVMESXXK	COG1879 ABC-type sugar transport system, periplasmic component	G	Bacteria	Firmicutes	Clostridia	Clostridiales	Ruminococcaceae	Ruminococcus	Ruminococcus obeum
RPGESXSXFASEGSXK	COG1621 Beta-fructosidases (levanase/invertase)	G	Bacteria	Firmicutes	Clostridia	Clostridiales	Ruminococcaceae	Ruminococcus	Ruminococcus sp.
FSVTNAQGGTSTXSDFSSAK	NO HITS		Bacteria	Firmicutes	Clostridia	Clostridiales	Ruminococcaceae	Ruminococcus	Ruminococcus bromii
SAGNAFFEXAAK	COG1879 ABC-type sugar transport system, periplasmic component	G	Bacteria	Firmicutes	Clostridia	Clostridiales	Ruminococcaceae	Ruminococcus	Ruminococcus obeum
GXWQXTTMPK	COG1653 ABC-type sugar transport system, periplasmic component	G	Bacteria	Firmicutes	Clostridia	Clostridiales	Ruminococcaceae	Ruminococcus	Ruminococcus sp.
VYYXNFKPEQDEAWQNXAK	COG1653 ABC-type sugar transport system, periplasmic component	G	Bacteria	Firmicutes	Clostridia	Clostridiales	Ruminococcaceae	Ruminococcus	Ruminococcus obeum
SWXXGXKEYR	COG2160 L-arabinose isomerase	G	Bacteria	Firmicutes	Clostridia	Clostridiales	Ruminococcaceae	Ruminococcus
EFEPDWXVAMGGGSPXDAAK	COG1454 Alcohol dehydrogenase, class IV	C	Bacteria	Firmicutes	Clostridia	Clostridiales	Ruminococcaceae	Ruminococcus
TXPHFNFEVPTEXPGVDSGXXDPR	COG1866 Phosphoenolpyruvate carboxykinase (ATP)	C	Bacteria	Firmicutes	Clostridia	Clostridiales	Ruminococcaceae	Ruminococcus	Ruminococcus bromii
AGXDPSTXTGPDAXKEAFETXDSK	COG1653 ABC-type sugar transport system, periplasmic component	G	Bacteria	Firmicutes	Clostridia	Clostridiales	Ruminococcaceae	Ruminococcus	Ruminococcus sp.
FGFXDKAVAYXK	NO HITS		Bacteria	Firmicutes	Clostridia	Clostridiales	Ruminococcaceae	Ruminococcus	Ruminococcus sp.
GXXDAXXDGSXTK	COG1866 Phosphoenolpyruvate carboxykinase (ATP)	C	Bacteria	Firmicutes	Clostridia	Clostridiales	Ruminococcaceae	Ruminococcus	Ruminococcus bromii
GXKYPXADFNXTPDVAXVDPAXAETMPAK	COG1454 Alcohol dehydrogenase, class IV	C	Bacteria	Firmicutes	Clostridia	Clostridiales	Ruminococcaceae	Ruminococcus	Ruminococcus bromii
GETTEEXVDAXXAEXR	COG1454 Alcohol dehydrogenase, class IV	C	Bacteria	Firmicutes	Clostridia	Clostridiales	Ruminococcaceae	Ruminococcus	Ruminococcus bromii
NANEPEFXQAATEVXTSXEPVFEQNPK	COG0334 Glutamate dehydrogenase/leucine dehydrogenase	E	Bacteria	Firmicutes	Clostridia	Clostridiales	Ruminococcaceae	Ruminococcus	Ruminococcus bromii
XAAXEGGTAAXAVASGAAAVSYAXQAXAK	COG2873 O-acetylhomoserine sulfhydrylase	E	Bacteria	Firmicutes	Clostridia	Clostridiales	Ruminococcaceae	Ruminococcus	Ruminococcus bromii
XVRPXSSAPAAK	COG1866 Phosphoenolpyruvate carboxykinase (ATP)	C	Bacteria	Firmicutes	Clostridia	Clostridiales	Ruminococcaceae	Ruminococcus	Ruminococcus obeum
VNVYVQSSDNSTXNK	NO HITS		Bacteria	Firmicutes	Clostridia	Clostridiales	Ruminococcaceae	Ruminococcus	Ruminococcus bromii
XHPSVNXGVXK	COG0334 Glutamate dehydrogenase/leucine dehydrogenase	E	Bacteria	Firmicutes	Clostridia	Clostridiales	Ruminococcaceae	Ruminococcus	Ruminococcus bromii
SAGNAFFEXAAK	COG1879 ABC-type sugar transport system, periplasmic component	G	Bacteria	Firmicutes	Clostridia	Clostridiales	Ruminococcaceae	Ruminococcus	Ruminococcus obeum
AEAQGFEVFTAAEAAK	COG0059 Ketol-acid reductoisomerase	EH	Bacteria	Firmicutes	Clostridia	Clostridiales	Ruminococcaceae	Ruminococcus	Ruminococcus gnavus
SWXXGXKEYR	COG2160 L-arabinose isomerase	G	Bacteria	Firmicutes	Clostridia	Clostridiales	Ruminococcaceae	Ruminococcus
GTFQSXDVANXASGFASGK	NO HITS		Bacteria	Firmicutes	Clostridia	Clostridiales	Ruminococcaceae	Ruminococcus	Ruminococcus bromii
AGXDPSTXTGPDAXKEAFETXDSK	COG1653 ABC-type sugar transport system, periplasmic component	G	Bacteria	Firmicutes	Clostridia	Clostridiales	Ruminococcaceae	Ruminococcus	Ruminococcus sp.
KADXXYGFXDSSEXFK	COG1932 Phosphoserine aminotransferase	HE	Bacteria	Firmicutes	Clostridia	Clostridiales	Ruminococcaceae	Ruminococcus	Ruminococcus bromii
FGFXDKAVAYXK	NO HITS		Bacteria	Firmicutes	Clostridia	Clostridiales	Ruminococcaceae	Ruminococcus	Ruminococcus sp.
GXXDAXXDGSXTK	COG1866 Phosphoenolpyruvate carboxykinase (ATP)	C	Bacteria	Firmicutes	Clostridia	Clostridiales	Ruminococcaceae	Ruminococcus	Ruminococcus bromii
KXPYFDFEVPTEXPGVDPAXXDPR	COG1866 Phosphoenolpyruvate carboxykinase (ATP)	C	Bacteria	Firmicutes	Clostridia	Clostridiales	Ruminococcaceae	Ruminococcus	Ruminococcus albus
NANEPEFXQAATEVXTSXEPVFEQNPK	COG0334 Glutamate dehydrogenase/leucine dehydrogenase	E	Bacteria	Firmicutes	Clostridia	Clostridiales	Ruminococcaceae	Ruminococcus	Ruminococcus bromii
XAAXEGGTAAXAVASGAAAVSYAXQAXAK	COG2873 O-acetylhomoserine sulfhydrylase	E	Bacteria	Firmicutes	Clostridia	Clostridiales	Ruminococcaceae	Ruminococcus	Ruminococcus bromii
VGENPSDXSYER	COG0190 5,10-methylene-tetrahydrofolate dehydrogenase/Methenyl tetrahydrofolate cyclohydrolase	H	Bacteria	Firmicutes	Clostridia	Clostridiales	Ruminococcaceae	Ruminococcus
SFGGXGXFAXK	COG2407 L-fucose isomerase and related proteins	G	Bacteria	Firmicutes	Clostridia	Clostridiales	Ruminococcaceae	Ruminococcus
DSKPTTSXXTXTSNVVYGK	COG1882 Pyruvate-formate lyase	C	Bacteria	Firmicutes	Clostridia	Clostridiales	Ruminococcaceae	Ruminococcus
TXDFAEAGDNVGVXXR	COG0050 GTPases - translation elongation factors	J	Bacteria	Firmicutes	Clostridia	Clostridiales	Ruminococcaceae	Ruminococcus	Ruminococcus bromii
NXFEQXVYGR	COG0822 NifU homolog involved in Fe-S cluster formation	C	Bacteria	Firmicutes	Clostridia	Clostridiales	Ruminococcaceae	Ruminococcus	Ruminococcus bromii
GTFQSXDVANXASGFASGK	NO HITS		Bacteria	Firmicutes	Clostridia	Clostridiales	Ruminococcaceae	Ruminococcus	Ruminococcus bromii
KADQPFXMPVEDVFTXTGR	COG0050 GTPases - translation elongation factors	J	Bacteria	Firmicutes	Clostridia	Clostridiales	Ruminococcaceae	Ruminococcus	Ruminococcus bromii
DNSNVEXXTKMVXEAVEK	COG4869 Propanediol utilization protein	Q	Bacteria	Firmicutes	Clostridia	Clostridiales	Ruminococcaceae	Ruminococcus	Ruminococcus torques
GXXDAXXDGSXTK	COG1866 Phosphoenolpyruvate carboxykinase (ATP)	C	Bacteria	Firmicutes	Clostridia	Clostridiales	Ruminococcaceae	Ruminococcus	Ruminococcus bromii
ADQPFXMPVEDVFTXTGR	COG0050 GTPases - translation elongation factors	J	Bacteria	Firmicutes	Clostridia	Clostridiales	Ruminococcaceae	Ruminococcus	Ruminococcus bromii
YGNDDDRADEXATTXXSTFXEK	COG1882 Pyruvate-formate lyase	C	Bacteria	Firmicutes	Clostridia	Clostridiales	Ruminococcaceae	Ruminococcus
AAASESFGYNEDPXVSSDVXGMR	COG0057 Glyceraldehyde-3-phosphate dehydrogenase/erythrose-4-phosphate dehydrogenase	G	Bacteria	Firmicutes	Clostridia	Clostridiales	Ruminococcaceae	Ruminococcus	Ruminococcus bromii
XDXFNVTEEEXK	COG0149 Triosephosphate isomerase	G	Bacteria	Firmicutes	Clostridia	Clostridiales	Ruminococcaceae	Ruminococcus	Ruminococcus bromii
NXFEQXVYGR	COG0822 NifU homolog involved in Fe-S cluster formation	C	Bacteria	Firmicutes	Clostridia	Clostridiales	Ruminococcaceae	Ruminococcus	Ruminococcus bromii
KADQPFXMPVEDVFTXTGR	COG0050 GTPases - translation elongation factors	J	Bacteria	Firmicutes	Clostridia	Clostridiales	Ruminococcaceae	Ruminococcus	Ruminococcus bromii
DNSNVEXXTKMVXEAVEK	COG4869 Propanediol utilization protein	Q	Bacteria	Firmicutes	Clostridia	Clostridiales	Ruminococcaceae	Ruminococcus	Ruminococcus torques
GXXDAXXDGSXTK	COG1866 Phosphoenolpyruvate carboxykinase (ATP)	C	Bacteria	Firmicutes	Clostridia	Clostridiales	Ruminococcaceae	Ruminococcus	Ruminococcus bromii
GDKWYNYHVADVTK	COG0366 Glycosidases	G	Bacteria	Firmicutes	Clostridia	Clostridiales	Ruminococcaceae	Ruminococcus	Ruminococcus bromii
SPEEYWAQKPGVQYQQR	COG0366 Glycosidases	G	Bacteria	Firmicutes	Clostridia	Clostridiales	Ruminococcaceae	Ruminococcus	Ruminococcus bromii
SDNAYXDGXTYHGSDR	COG0366 Glycosidases	G	Bacteria	Firmicutes	Clostridia	Clostridiales	Ruminococcaceae	Ruminococcus	Ruminococcus bromii
VAXYGXDAXXEGK	COG1882 Pyruvate-formate lyase	C	Bacteria	Firmicutes	Clostridia	Clostridiales	Ruminococcaceae	Ruminococcus
AXADTDATTXXGGGDSAAAVXQXGFADK	COG0126 3-phosphoglycerate kinase	G	Bacteria	Firmicutes	Clostridia	Clostridiales	Ruminococcaceae	Ruminococcus	Ruminococcus bromii
DXGNXQESXXPTQYXXDTYGXK	COG0366 Glycosidases	G	Bacteria	Firmicutes	Clostridia	Clostridiales	Ruminococcaceae	Ruminococcus	Ruminococcus bromii
VNVYVQSSDNSTXNK	NO HITS		Bacteria	Firmicutes	Clostridia	Clostridiales	Ruminococcaceae	Ruminococcus	Ruminococcus bromii
SPEEYWAQKPGVQYQQR	COG0366 Glycosidases	G	Bacteria	Firmicutes	Clostridia	Clostridiales	Ruminococcaceae	Ruminococcus	Ruminococcus bromii
SDNAYXDGXTYHGSDR	COG0366 Glycosidases	G	Bacteria	Firmicutes	Clostridia	Clostridiales	Ruminococcaceae	Ruminococcus	Ruminococcus bromii
FSPTNEAXXGAAVK	COG1529 Aerobic-type carbon monoxide dehydrogenase, large subunit CoxL/CutL homologs	C	Bacteria	Firmicutes	Clostridia	Clostridiales	Ruminococcaceae	Ruminococcus
DXGNXQESXXPTQYXXDTYGXK	COG0366 Glycosidases	G	Bacteria	Firmicutes	Clostridia	Clostridiales	Ruminococcaceae	Ruminococcus	Ruminococcus bromii
VVDGKPXEGTFR	COG3957 Phosphoketolase	G	Bacteria	Firmicutes	Clostridia	Clostridiales	Ruminococcaceae	Subdoligranulum	Subdoligranulum variabile
SDAPTXFQVNGPVGXANWK	COG1653 ABC-type sugar transport system, periplasmic component	G	Bacteria	Firmicutes	Clostridia	Clostridiales	Ruminococcaceae	Subdoligranulum	Subdoligranulum variabile
SRDYVNVXVTSK	COG3957 Phosphoketolase	G	Bacteria	Firmicutes	Clostridia	Clostridiales	Ruminococcaceae	Subdoligranulum	Subdoligranulum variabile
XGXXGNFXGMXTDSR	COG1904 Glucuronate isomerase	G	Bacteria	Firmicutes	Clostridia	Clostridiales	Ruminococcaceae	Subdoligranulum	Subdoligranulum variabile
XGXXGNFXGMXTDSR	COG1904 Glucuronate isomerase	G	Bacteria	Firmicutes	Clostridia	Clostridiales	Ruminococcaceae	Subdoligranulum	Subdoligranulum variabile
XHEEMPEVYDQFVEXATR	COG0574 Phosphoenolpyruvate synthase/pyruvate phosphate dikinase	G	Bacteria	Firmicutes	Clostridia	Clostridiales	Ruminococcaceae	Subdoligranulum	Subdoligranulum variabile
XGXXGNFXGMXTDSR	COG1904 Glucuronate isomerase	G	Bacteria	Firmicutes	Clostridia	Clostridiales	Ruminococcaceae	Subdoligranulum	Subdoligranulum variabile
XGXXGNFXGMXTDSR	COG1904 Glucuronate isomerase	G	Bacteria	Firmicutes	Clostridia	Clostridiales	Ruminococcaceae	Subdoligranulum	Subdoligranulum variabile
AHQVPXDXTVGTPNQEEHXK	COG3957 Phosphoketolase	G	Bacteria	Firmicutes	Clostridia	Clostridiales	Ruminococcaceae	Subdoligranulum	Subdoligranulum variabile
XGXXGNFXGMXTDSR	COG1904 Glucuronate isomerase	G	Bacteria	Firmicutes	Clostridia	Clostridiales	Ruminococcaceae	Subdoligranulum	Subdoligranulum variabile
SRDYVNVXVTSK	COG3957 Phosphoketolase	G	Bacteria	Firmicutes	Clostridia	Clostridiales	Ruminococcaceae	Subdoligranulum	Subdoligranulum variabile
XHEEMPEVYDQFVEXATR	COG0574 Phosphoenolpyruvate synthase/pyruvate phosphate dikinase	G	Bacteria	Firmicutes	Clostridia	Clostridiales	Ruminococcaceae	Subdoligranulum	Subdoligranulum variabile
XGXXGNFXGMXTDSR	COG1904 Glucuronate isomerase	G	Bacteria	Firmicutes	Clostridia	Clostridiales	Ruminococcaceae	Subdoligranulum	Subdoligranulum variabile
TAXDKDNQVXGYQFVR	COG0822 NifU homolog involved in Fe-S cluster formation	C	Bacteria	Firmicutes	Clostridia	Clostridiales	Ruminococcaceae	Subdoligranulum	Subdoligranulum variabile
XXEVXAGVNTPAETVETXKK	COG1250 3-hydroxyacyl-CoA dehydrogenase	I	Bacteria	Firmicutes	Clostridia	Clostridiales	Ruminococcaceae	Subdoligranulum	Subdoligranulum variabile
YXEXTEGYXXK	COG0822 NifU homolog involved in Fe-S cluster formation	C	Bacteria	Firmicutes	Clostridia	Clostridiales	Ruminococcaceae	Subdoligranulum	Subdoligranulum variabile
GFFPVADXPTXR	COG3959 Transketolase, N-terminal subunit	G	Bacteria	Firmicutes	Clostridia	Clostridiales	Ruminococcaceae	Subdoligranulum	Subdoligranulum variabile
XGXXGNFXGMXTDSR	COG1904 Glucuronate isomerase	G	Bacteria	Firmicutes	Clostridia	Clostridiales	Ruminococcaceae	Subdoligranulum	Subdoligranulum variabile
DYAETXAEXATXVDGPXSGEVK	COG0176 Transaldolase	G	Bacteria	Firmicutes	Clostridia	Clostridiales	Ruminococcaceae	Subdoligranulum	Subdoligranulum variabile
XXEVXAGVNTPAETVETXKK	COG1250 3-hydroxyacyl-CoA dehydrogenase	I	Bacteria	Firmicutes	Clostridia	Clostridiales	Ruminococcaceae	Subdoligranulum	Subdoligranulum variabile
XGXXGNFXGMXTDSR	COG1904 Glucuronate isomerase	G	Bacteria	Firmicutes	Clostridia	Clostridiales	Ruminococcaceae	Subdoligranulum	Subdoligranulum variabile
SRDYVNVXVTSK	COG3957 Phosphoketolase	G	Bacteria	Firmicutes	Clostridia	Clostridiales	Ruminococcaceae	Subdoligranulum	Subdoligranulum variabile
AHQVPXDXTVGTPNQEEHXK	COG3957 Phosphoketolase	G	Bacteria	Firmicutes	Clostridia	Clostridiales	Ruminococcaceae	Subdoligranulum	Subdoligranulum variabile
XAEEXAEVXGGVVGGSR	COG2025 Electron transfer flavoprotein, alpha subunit	C	Bacteria	Firmicutes	Clostridia	Clostridiales	Ruminococcaceae	unclassified Ruminococcaceae	Ruminococcaceae bacterium
XAEEXAEVXGGVVGGSR	COG2025 Electron transfer flavoprotein, alpha subunit	C	Bacteria	Firmicutes	Clostridia	Clostridiales	Ruminococcaceae	unclassified Ruminococcaceae	Ruminococcaceae bacterium
GXXDAXXDGSXXK	COG1866 Phosphoenolpyruvate carboxykinase (ATP)	C	Bacteria	Firmicutes	Clostridia	Clostridiales	Ruminococcaceae
GNPTVEAEXTXADGTVAR	COG0148 Enolase	G	Bacteria	Firmicutes	Clostridia	Clostridiales	Ruminococcaceae
XDAGTTVYNSVK / VEAGTTVYNSVK	COG0480 Translation elongation factors (GTPases)	J	Bacteria	Firmicutes	Clostridia	Clostridiales	Ruminococcaceae
XDAGTTVYNSVK / VEAGTTVYNSVK	COG0480 Translation elongation factors (GTPases)	J	Bacteria	Firmicutes	Clostridia	Clostridiales	Ruminococcaceae
XVYQQXTXXTK	COG0696 Phosphoglyceromutase	G	Bacteria	Firmicutes	Clostridia	Clostridiales	Ruminococcaceae
GYYTFASYADTFR	NO HITS		Bacteria	Firmicutes	Clostridia	Clostridiales	Ruminococcaceae
WCAEVFHAXASXXK	COG0148 Enolase	G	Bacteria	Firmicutes	Clostridia	Clostridiales	Ruminococcaceae
GXXDAXXDGSXXK	COG1866 Phosphoenolpyruvate carboxykinase (ATP)	C	Bacteria	Firmicutes	Clostridia	Clostridiales	Ruminococcaceae
XDAGTTVYNSVK / VEAGTTVYNSVK	COG0480 Translation elongation factors (GTPases)	J	Bacteria	Firmicutes	Clostridia	Clostridiales	Ruminococcaceae
WCAEVFHAXASXXK	COG0148 Enolase	G	Bacteria	Firmicutes	Clostridia	Clostridiales	Ruminococcaceae
XDAGTTVYNSVK / VEAGTTVYNSVK	COG0480 Translation elongation factors (GTPases)	J	Bacteria	Firmicutes	Clostridia	Clostridiales	Ruminococcaceae
WCAEVFHAXASXXK	COG0148 Enolase	G	Bacteria	Firmicutes	Clostridia	Clostridiales	Ruminococcaceae
WCAEVFHAXASXXK	COG0148 Enolase	G	Bacteria	Firmicutes	Clostridia	Clostridiales	Ruminococcaceae
XDAGTTVYNSVK / VEAGTTVYNSVK	COG0480 Translation elongation factors (GTPases)	J	Bacteria	Firmicutes	Clostridia	Clostridiales	Ruminococcaceae
WCAEVFHAXASXXK	COG0148 Enolase	G	Bacteria	Firmicutes	Clostridia	Clostridiales	Ruminococcaceae
XDAGTTVYNSVK / VEAGTTVYNSVK	COG0480 Translation elongation factors (GTPases)	J	Bacteria	Firmicutes	Clostridia	Clostridiales	Ruminococcaceae
GXXDAXXDGSXXK	COG1866 Phosphoenolpyruvate carboxykinase (ATP)	C	Bacteria	Firmicutes	Clostridia	Clostridiales	Ruminococcaceae
XDAGTTVYNSVK / VEAGTTVYNSVK	COG0480 Translation elongation factors (GTPases)	J	Bacteria	Firmicutes	Clostridia	Clostridiales	Ruminococcaceae
EFGGSDTFATSQXXAAAVNK	COG2086 Electron transfer flavoprotein, beta subunit	C	Bacteria	Firmicutes	Clostridia	Clostridiales	Ruminococcaceae
GXXDAXXDGSXXK	COG1866 Phosphoenolpyruvate carboxykinase (ATP)	C	Bacteria	Firmicutes	Clostridia	Clostridiales	Ruminococcaceae
AKDXAXAYASGXGAGR	COG0059 Ketol-acid reductoisomerase	EH	Bacteria	Firmicutes	Clostridia	Clostridiales	Ruminococcaceae
YXGNAVNDPVRPFTAXXGGAK	COG0126 3-phosphoglycerate kinase	G	Bacteria	Firmicutes	Clostridia	Clostridiales	Ruminococcaceae
VGGGDSFGGGXXYAXXNGK	COG0524 Sugar kinases, ribokinase family	G	Bacteria	Firmicutes	Clostridia	Clostridiales	Ruminococcaceae
GXXDAXXDGSXXK	COG1866 Phosphoenolpyruvate carboxykinase (ATP)	C	Bacteria	Firmicutes	Clostridia	Clostridiales	Ruminococcaceae
RVXAHDTDGAXK	COG0166 Glucose-6-phosphate isomerase	G	Bacteria	Firmicutes	Clostridia	Clostridiales
VHAGEXTNAAGEK	COG0166 Glucose-6-phosphate isomerase	G	Bacteria	Firmicutes	Clostridia	Clostridiales
XVRPXSAAPAAK	COG1866 Phosphoenolpyruvate carboxykinase (ATP)	C	Bacteria	Firmicutes	Clostridia	Clostridiales
XAAAQAAXANK	COG0574 Phosphoenolpyruvate synthase/pyruvate phosphate dikinase	G	Bacteria	Firmicutes	Clostridia	Clostridiales
HVENXTQVYK	COG2759 Formyltetrahydrofolate synthetase	F	Bacteria	Firmicutes	Clostridia	Clostridiales
XREEXADQXK	COG1882 Pyruvate-formate lyase	C	Bacteria	Firmicutes	Clostridia	Clostridiales
VVAQNPGEPEFHQAVK	COG0334 Glutamate dehydrogenase/leucine dehydrogenase	E	Bacteria	Firmicutes	Clostridia	Clostridiales
XRGSYEGVXTGK	COG0334 Glutamate dehydrogenase/leucine dehydrogenase	E	Bacteria	Firmicutes	Clostridia	Clostridiales
HTHXVTGXPDTYGR	COG1882 Pyruvate-formate lyase	C	Bacteria	Firmicutes	Clostridia	Clostridiales
HTHXVTGXPDTYGR	COG1882 Pyruvate-formate lyase	C	Bacteria	Firmicutes	Clostridia	Clostridiales
AANAGGVATSAXEMSQNSQR	COG0334 Glutamate dehydrogenase/leucine dehydrogenase	E	Bacteria	Firmicutes	Clostridia	Clostridiales
FAADPEVVGPNAK	COG0126 3-phosphoglycerate kinase	G	Bacteria	Firmicutes	Clostridia	Clostridiales
FXNAYYDAK	COG0574 Phosphoenolpyruvate synthase/pyruvate phosphate dikinase	G	Bacteria	Firmicutes	Clostridia	Clostridiales
GXYEGVXTGK	COG0334 Glutamate dehydrogenase/leucine dehydrogenase	E	Bacteria	Firmicutes	Clostridia	Clostridiales
VPWVDDNGKVQVNR	COG0334 Glutamate dehydrogenase/leucine dehydrogenase	E	Bacteria	Firmicutes	Clostridia	Clostridiales
GNPTVEAEVYXADGTVGR	COG0148 Enolase	G	Bacteria	Firmicutes	Clostridia	Clostridiales
XXYDFXDQSK	COG1932 Phosphoserine aminotransferase	HE	Bacteria	Firmicutes	Clostridia	Clostridiales
FTTVVQXGXGGSDXGPR	COG0166 Glucose-6-phosphate isomerase	G	Bacteria	Firmicutes	Clostridia	Clostridiales
XFNVNWFK	COG1274 Phosphoenolpyruvate carboxykinase (GTP)	C	Bacteria	Firmicutes	Clostridia	Clostridiales
VXNXYCWNEEFK	COG1653 ABC-type sugar transport system, periplasmic component	G	Bacteria	Firmicutes	Clostridia	Clostridiales
AADXPVXFFNR	COG1879 ABC-type sugar transport system, periplasmic component	G	Bacteria	Firmicutes	Clostridia	Clostridiales
XGFXGGMAVPAVXR	COG1744 Uncharacterized ABC-type transport system, periplasmic component/surface lipoprotein	R	Bacteria	Firmicutes	Clostridia	Clostridiales
GXXDAXXSGAXNEAPTKK	COG1866 Phosphoenolpyruvate carboxykinase (ATP)	C	Bacteria	Firmicutes	Clostridia	Clostridiales
GXXDAXXSGAXNEAPTKK	COG1866 Phosphoenolpyruvate carboxykinase (ATP)	C	Bacteria	Firmicutes	Clostridia	Clostridiales
EXDFXGNAVNNPERPFVAXXGGAK	COG0126 3-phosphoglycerate kinase	G	Bacteria	Firmicutes	Clostridia	Clostridiales
GXXDAXXSGAXNEAPTK	COG1866 Phosphoenolpyruvate carboxykinase (ATP)	C	Bacteria	Firmicutes	Clostridia	Clostridiales
TWEYPYXYNXXDQYR	NO HITS		Bacteria	Firmicutes	Clostridia	Clostridiales
TQATGYGXXYXTNAXWK	COG0334 Glutamate dehydrogenase/leucine dehydrogenase	E	Bacteria	Firmicutes	Clostridia	Clostridiales
EXDFXGNAVENPVRPFVAXXGGAK	COG0126 3-phosphoglycerate kinase	G	Bacteria	Firmicutes	Clostridia	Clostridiales
NYRPNSEYHEGR	COG0334 Glutamate dehydrogenase/leucine dehydrogenase	E	Bacteria	Firmicutes	Clostridia	Clostridiales
XVRPVSAAPAAK	COG1866 Phosphoenolpyruvate carboxykinase (ATP)	C	Bacteria	Firmicutes	Clostridia	Clostridiales
XVRPXSAAPAAK	COG1866 Phosphoenolpyruvate carboxykinase (ATP)	C	Bacteria	Firmicutes	Clostridia	Clostridiales
VVAQNPGEPEFHQAVK	COG0334 Glutamate dehydrogenase/leucine dehydrogenase	E	Bacteria	Firmicutes	Clostridia	Clostridiales
XRGSYEGVXTGK	COG0334 Glutamate dehydrogenase/leucine dehydrogenase	E	Bacteria	Firmicutes	Clostridia	Clostridiales
HTHXVTGXPDTYGR	COG1882 Pyruvate-formate lyase	C	Bacteria	Firmicutes	Clostridia	Clostridiales
XETSPEDXTGMK	COG0574 Phosphoenolpyruvate synthase/pyruvate phosphate dikinase	G	Bacteria	Firmicutes	Clostridia	Clostridiales
FAADPEVVGPNAK	COG0126 3-phosphoglycerate kinase	G	Bacteria	Firmicutes	Clostridia	Clostridiales
YXGADTDVPAGDXGTGAR	COG0334 Glutamate dehydrogenase/leucine dehydrogenase	E	Bacteria	Firmicutes	Clostridia	Clostridiales
YXGADVDVPAGDXGTGAR	COG0334 Glutamate dehydrogenase/leucine dehydrogenase	E	Bacteria	Firmicutes	Clostridia	Clostridiales
GAAPSGASTGEFEAXEXR	COG0148 Enolase	G	Bacteria	Firmicutes	Clostridia	Clostridiales
VADKXNVXSNXXEK	COG0126 3-phosphoglycerate kinase	G	Bacteria	Firmicutes	Clostridia	Clostridiales
NYQAXVTHFGDXGAXK	COG2160 L-arabinose isomerase	G	Bacteria	Firmicutes	Clostridia	Clostridiales
XXYDFXDQSK	COG1932 Phosphoserine aminotransferase	HE	Bacteria	Firmicutes	Clostridia	Clostridiales
NXDTXXHPQFDAAAXK	COG0574 Phosphoenolpyruvate synthase/pyruvate phosphate dikinase	G	Bacteria	Firmicutes	Clostridia	Clostridiales
FXDPPXHEFVPTEEADXEK	COG0574 Phosphoenolpyruvate synthase/pyruvate phosphate dikinase	G	Bacteria	Firmicutes	Clostridia	Clostridiales
XGFXGGMAVPAVXR	COG1744 Uncharacterized ABC-type transport system, periplasmic component/surface lipoprotein	R	Bacteria	Firmicutes	Clostridia	Clostridiales
AAAXSXDXPXYR	COG0148 Enolase	G	Bacteria	Firmicutes	Clostridia	Clostridiales
XFNVNWFK	COG1274 Phosphoenolpyruvate carboxykinase (GTP)	C	Bacteria	Firmicutes	Clostridia	Clostridiales
VXNXYCWNEEFK	COG1653 ABC-type sugar transport system, periplasmic component	G	Bacteria	Firmicutes	Clostridia	Clostridiales
EAXEXXVEAXK	COG0148 Enolase	G	Bacteria	Firmicutes	Clostridia	Clostridiales
XGFXGGMAVPAVXR	COG1744 Uncharacterized ABC-type transport system, periplasmic component/surface lipoprotein	R	Bacteria	Firmicutes	Clostridia	Clostridiales
GXXDAXXSGAXNEAPTKK	COG1866 Phosphoenolpyruvate carboxykinase (ATP)	C	Bacteria	Firmicutes	Clostridia	Clostridiales
EXDFXGNAVNNPERPFVAXXGGAK	COG0126 3-phosphoglycerate kinase	G	Bacteria	Firmicutes	Clostridia	Clostridiales
ADDAXWXFPTVYK	COG3459 Cellobiose phosphorylase	G	Bacteria	Firmicutes	Clostridia	Clostridiales
TWEYPYXYNXXDQYR	NO HITS		Bacteria	Firmicutes	Clostridia	Clostridiales
TQATGYGXXYXTNAXWK	COG0334 Glutamate dehydrogenase/leucine dehydrogenase	E	Bacteria	Firmicutes	Clostridia	Clostridiales
FVADXVXPDXXVXGK	COG0161 Adenosylmethionine-8-amino-7-oxononanoate aminotransferase	H	Bacteria	Firmicutes	Clostridia	Clostridiales
GXATSVGDEGGFAPAXKSDEEAXETXXEAVK	COG0148 Enolase	G	Bacteria	Firmicutes	Clostridia	Clostridiales
XVRPXSAAPAAK	COG1866 Phosphoenolpyruvate carboxykinase (ATP)	C	Bacteria	Firmicutes	Clostridia	Clostridiales
XREEXADQXK	COG1882 Pyruvate-formate lyase	C	Bacteria	Firmicutes	Clostridia	Clostridiales
GDPENXDAQYR	COG1879 ABC-type sugar transport system, periplasmic component	G	Bacteria	Firmicutes	Clostridia	Clostridiales
VVAQNPGEPEFHQAVK	COG0334 Glutamate dehydrogenase/leucine dehydrogenase	E	Bacteria	Firmicutes	Clostridia	Clostridiales
XRGSYEGVXTGK	COG0334 Glutamate dehydrogenase/leucine dehydrogenase	E	Bacteria	Firmicutes	Clostridia	Clostridiales
XRGSYEGVXTGK	COG0334 Glutamate dehydrogenase/leucine dehydrogenase	E	Bacteria	Firmicutes	Clostridia	Clostridiales
EMXCSDTVEER	COG0574 Phosphoenolpyruvate synthase/pyruvate phosphate dikinase	G	Bacteria	Firmicutes	Clostridia	Clostridiales
HTHXVTGXPDTYGR	COG1882 Pyruvate-formate lyase	C	Bacteria	Firmicutes	Clostridia	Clostridiales
GSYEGVXTGK	COG0334 Glutamate dehydrogenase/leucine dehydrogenase	E	Bacteria	Firmicutes	Clostridia	Clostridiales
MGCVXQAAQGQNVAR	COG0183 Acetyl-CoA acetyltransferase	I	Bacteria	Firmicutes	Clostridia	Clostridiales
FAADPEVVGPNAK	COG0126 3-phosphoglycerate kinase	G	Bacteria	Firmicutes	Clostridia	Clostridiales
FXNAYYDAK	COG0574 Phosphoenolpyruvate synthase/pyruvate phosphate dikinase	G	Bacteria	Firmicutes	Clostridia	Clostridiales
KXGAFGXTEPGAGTDAQGQQTK	COG1960 Acyl-CoA dehydrogenases	I	Bacteria	Firmicutes	Clostridia	Clostridiales
DTYADASEWETK	COG1866 Phosphoenolpyruvate carboxykinase (ATP)	C	Bacteria	Firmicutes	Clostridia	Clostridiales
GXYEGVXTGK	COG0334 Glutamate dehydrogenase/leucine dehydrogenase	E	Bacteria	Firmicutes	Clostridia	Clostridiales
YXGADTDVPAGDXGTGAR	COG0334 Glutamate dehydrogenase/leucine dehydrogenase	E	Bacteria	Firmicutes	Clostridia	Clostridiales
GTPCXVAVEQDATGK	COG0059 Ketol-acid reductoisomerase	EH	Bacteria	Firmicutes	Clostridia	Clostridiales
VSYPXNHXKNXVRPXSSAPAAK	COG1866 Phosphoenolpyruvate carboxykinase (ATP)	C	Bacteria	Firmicutes	Clostridia	Clostridiales
YSXSNTAEYGDYVTGPK	COG0059 Ketol-acid reductoisomerase	EH	Bacteria	Firmicutes	Clostridia	Clostridiales
YXGADVDVPAGDXGTGAR	COG0334 Glutamate dehydrogenase/leucine dehydrogenase	E	Bacteria	Firmicutes	Clostridia	Clostridiales
YXQENGVXFVGGK	COG0334 Glutamate dehydrogenase/leucine dehydrogenase	E	Bacteria	Firmicutes	Clostridia	Clostridiales
VXDXDKDSEPDXYNAXK	COG1866 Phosphoenolpyruvate carboxykinase (ATP)	C	Bacteria	Firmicutes	Clostridia	Clostridiales
GAAPSGASTGEFEAXEXR	COG0148 Enolase	G	Bacteria	Firmicutes	Clostridia	Clostridiales
VYSGDXAAAVGFK	COG0480 Translation elongation factors (GTPases)	J	Bacteria	Firmicutes	Clostridia	Clostridiales
DSNQDVXGFVHQXPDR	COG3459 Cellobiose phosphorylase	G	Bacteria	Firmicutes	Clostridia	Clostridiales
DSGCNVXXGXYEGSK	COG0059 Ketol-acid reductoisomerase	EH	Bacteria	Firmicutes	Clostridia	Clostridiales
FTTVVQXGXGGSDXGPR	COG0166 Glucose-6-phosphate isomerase	G	Bacteria	Firmicutes	Clostridia	Clostridiales
FXDPPXHEFVPTEEADXEK	COG0574 Phosphoenolpyruvate synthase/pyruvate phosphate dikinase	G	Bacteria	Firmicutes	Clostridia	Clostridiales
DSNQDXXGFVHQXPDR	COG3459 Cellobiose phosphorylase	G	Bacteria	Firmicutes	Clostridia	Clostridiales
XGFXGGMAVPAVXR	COG1744 Uncharacterized ABC-type transport system, periplasmic component/surface lipoprotein	R	Bacteria	Firmicutes	Clostridia	Clostridiales
VXNXYCWNEEFK	COG1653 ABC-type sugar transport system, periplasmic component	G	Bacteria	Firmicutes	Clostridia	Clostridiales
EAXEXXVEAXK	COG0148 Enolase	G	Bacteria	Firmicutes	Clostridia	Clostridiales
XGFXGGMAVPAVXR	COG1744 Uncharacterized ABC-type transport system, periplasmic component/surface lipoprotein	R	Bacteria	Firmicutes	Clostridia	Clostridiales
GXXDAXXSGAXNEAPTKK	COG1866 Phosphoenolpyruvate carboxykinase (ATP)	C	Bacteria	Firmicutes	Clostridia	Clostridiales
GXXDXMEMK	COG0480 Translation elongation factors (GTPases)	J	Bacteria	Firmicutes	Clostridia	Clostridiales
EXDFXGNAVNNPERPFVAXXGGAK	COG0126 3-phosphoglycerate kinase	G	Bacteria	Firmicutes	Clostridia	Clostridiales
QADXXMXXXNDEK	COG0059 Ketol-acid reductoisomerase	EH	Bacteria	Firmicutes	Clostridia	Clostridiales
ADDAXWXFPTVYK	COG3459 Cellobiose phosphorylase	G	Bacteria	Firmicutes	Clostridia	Clostridiales
WCAEVFHAXAAXXK	COG0148 Enolase	G	Bacteria	Firmicutes	Clostridia	Clostridiales
GXXDAXXSGAXNEAPTK	COG1866 Phosphoenolpyruvate carboxykinase (ATP)	C	Bacteria	Firmicutes	Clostridia	Clostridiales
TQATGYGXXYXTNAXWK	COG0334 Glutamate dehydrogenase/leucine dehydrogenase	E	Bacteria	Firmicutes	Clostridia	Clostridiales
TEATGYGXXYXTNAXXK	COG0334 Glutamate dehydrogenase/leucine dehydrogenase	E	Bacteria	Firmicutes	Clostridia	Clostridiales
XXPYQQGDFEAXYEAXEGNPVTXR	COG0574 Phosphoenolpyruvate synthase/pyruvate phosphate dikinase	G	Bacteria	Firmicutes	Clostridia	Clostridiales
ADMTQAVXEGVAFAXR	COG1070 Sugar (pentulose and hexulose) kinases	G	Bacteria	Firmicutes	Clostridia	Clostridiales
XTNXDXPVAFASAFEGEXXR	COG1152 CO dehydrogenase/acetyl-CoA synthase alpha subunit;COG1614 CO dehydrogenase/acetyl-CoA synthase beta subunit [C]	C	Bacteria	Firmicutes	Clostridia	Clostridiales
AVADXXAXXSXGXK	COG1151 6Fe-6S prismane cluster-containing protein	C	Bacteria	Firmicutes	Clostridia	Clostridiales
XSNXQEXXPXXEQXVQSGAK	COG0459 Chaperonin GroEL (HSP60 family)	O	Bacteria	Firmicutes	Clostridia	Clostridiales
XVRPXSAAPAAK	COG1866 Phosphoenolpyruvate carboxykinase (ATP)	C	Bacteria	Firmicutes	Clostridia	Clostridiales
XREEXADQXK	COG1882 Pyruvate-formate lyase	C	Bacteria	Firmicutes	Clostridia	Clostridiales
GDPENXDAQYR	COG1879 ABC-type sugar transport system, periplasmic component	G	Bacteria	Firmicutes	Clostridia	Clostridiales
EMXCSDTVEER	COG0574 Phosphoenolpyruvate synthase/pyruvate phosphate dikinase	G	Bacteria	Firmicutes	Clostridia	Clostridiales
HTHXVTGXPDTYGR	COG1882 Pyruvate-formate lyase	C	Bacteria	Firmicutes	Clostridia	Clostridiales
GSYEGVXTGK	COG0334 Glutamate dehydrogenase/leucine dehydrogenase	E	Bacteria	Firmicutes	Clostridia	Clostridiales
MGCVXQAAQGQNVAR	COG0183 Acetyl-CoA acetyltransferase	I	Bacteria	Firmicutes	Clostridia	Clostridiales
FAADPEVVGPNAK	COG0126 3-phosphoglycerate kinase	G	Bacteria	Firmicutes	Clostridia	Clostridiales
FXNAYYDAK	COG0574 Phosphoenolpyruvate synthase/pyruvate phosphate dikinase	G	Bacteria	Firmicutes	Clostridia	Clostridiales
KXGAFGXTEPGAGTDAQGQQTK	COG1960 Acyl-CoA dehydrogenases	I	Bacteria	Firmicutes	Clostridia	Clostridiales
DTYADASEWETK	COG1866 Phosphoenolpyruvate carboxykinase (ATP)	C	Bacteria	Firmicutes	Clostridia	Clostridiales
YXGADTDVPAGDXGTGAR	COG0334 Glutamate dehydrogenase/leucine dehydrogenase	E	Bacteria	Firmicutes	Clostridia	Clostridiales
AANAGGVATSAXEMSQNSQR	COG0334 Glutamate dehydrogenase/leucine dehydrogenase	E	Bacteria	Firmicutes	Clostridia	Clostridiales
VPWVDDNGKVQVNR	COG0334 Glutamate dehydrogenase/leucine dehydrogenase	E	Bacteria	Firmicutes	Clostridia	Clostridiales
VSYPXNHXKNXVRPXSSAPAAK	COG1866 Phosphoenolpyruvate carboxykinase (ATP)	C	Bacteria	Firmicutes	Clostridia	Clostridiales
YSXSNTAEYGDYVTGPK	COG0059 Ketol-acid reductoisomerase	EH	Bacteria	Firmicutes	Clostridia	Clostridiales
YXQENGVXFVGGK	COG0334 Glutamate dehydrogenase/leucine dehydrogenase	E	Bacteria	Firmicutes	Clostridia	Clostridiales
VXDXDKDSEPDXYNAXK	COG1866 Phosphoenolpyruvate carboxykinase (ATP)	C	Bacteria	Firmicutes	Clostridia	Clostridiales
XXYDFXDQSK	COG1932 Phosphoserine aminotransferase	HE	Bacteria	Firmicutes	Clostridia	Clostridiales
VYSGDXAAAXGFK	COG0480 Translation elongation factors (GTPases)	J	Bacteria	Firmicutes	Clostridia	Clostridiales
FTTVVQXGXGGSDXGPR	COG0166 Glucose-6-phosphate isomerase	G	Bacteria	Firmicutes	Clostridia	Clostridiales
FXDPPXHEFVPTEEADXEK	COG0574 Phosphoenolpyruvate synthase/pyruvate phosphate dikinase	G	Bacteria	Firmicutes	Clostridia	Clostridiales
XGFXGGMAVPAVXR	COG1744 Uncharacterized ABC-type transport system, periplasmic component/surface lipoprotein	R	Bacteria	Firmicutes	Clostridia	Clostridiales
VXNXYCWNEEFK	COG1653 ABC-type sugar transport system, periplasmic component	G	Bacteria	Firmicutes	Clostridia	Clostridiales
TEWWNMXQR	COG1653 ABC-type sugar transport system, periplasmic component	G	Bacteria	Firmicutes	Clostridia	Clostridiales
XTEAEAQEXXDHFTMK	COG1882 Pyruvate-formate lyase	C	Bacteria	Firmicutes	Clostridia	Clostridiales
XTEAEAQEXXDHFTMK	COG1882 Pyruvate-formate lyase	C	Bacteria	Firmicutes	Clostridia	Clostridiales
EAXEXXVEAXK	COG0148 Enolase	G	Bacteria	Firmicutes	Clostridia	Clostridiales
XGFXGGMAVPAVXR	COG1744 Uncharacterized ABC-type transport system, periplasmic component/surface lipoprotein	R	Bacteria	Firmicutes	Clostridia	Clostridiales
GXXDAXXSGAXNEAPTKK	COG1866 Phosphoenolpyruvate carboxykinase (ATP)	C	Bacteria	Firmicutes	Clostridia	Clostridiales
GXXDXMEMK	COG0480 Translation elongation factors (GTPases)	J	Bacteria	Firmicutes	Clostridia	Clostridiales
EXDFXGNAVNNPERPFVAXXGGAK	COG0126 3-phosphoglycerate kinase	G	Bacteria	Firmicutes	Clostridia	Clostridiales
GXXDAXXSGAXNEAPTK	COG1866 Phosphoenolpyruvate carboxykinase (ATP)	C	Bacteria	Firmicutes	Clostridia	Clostridiales
WCAEVFHAXAAXXK	COG0148 Enolase	G	Bacteria	Firmicutes	Clostridia	Clostridiales
TQATGYGXXYXTNAXWK	COG0334 Glutamate dehydrogenase/leucine dehydrogenase	E	Bacteria	Firmicutes	Clostridia	Clostridiales
TEATGYGXXYXTNAXXK	COG0334 Glutamate dehydrogenase/leucine dehydrogenase	E	Bacteria	Firmicutes	Clostridia	Clostridiales
ADMTQAVXEGVAFAXR	COG1070 Sugar (pentulose and hexulose) kinases	G	Bacteria	Firmicutes	Clostridia	Clostridiales
AVADXXAXXSXGXK	COG1151 6Fe-6S prismane cluster-containing protein	C	Bacteria	Firmicutes	Clostridia	Clostridiales
XSNXQEXXPXXEQXVQSGAK	COG0459 Chaperonin GroEL (HSP60 family)	O	Bacteria	Firmicutes	Clostridia	Clostridiales
XVRPXSAAPAAK	COG1866 Phosphoenolpyruvate carboxykinase (ATP)	C	Bacteria	Firmicutes	Clostridia	Clostridiales
XREEXADQXK	COG1882 Pyruvate-formate lyase	C	Bacteria	Firmicutes	Clostridia	Clostridiales
XREEXADQXK	COG1882 Pyruvate-formate lyase	C	Bacteria	Firmicutes	Clostridia	Clostridiales
XREEXADQXK	COG1882 Pyruvate-formate lyase	C	Bacteria	Firmicutes	Clostridia	Clostridiales
GDPENXDAQYR	COG1879 ABC-type sugar transport system, periplasmic component	G	Bacteria	Firmicutes	Clostridia	Clostridiales
VVAQNPGEPEFHQAVK	COG0334 Glutamate dehydrogenase/leucine dehydrogenase	E	Bacteria	Firmicutes	Clostridia	Clostridiales
XRGSYEGVXTGK	COG0334 Glutamate dehydrogenase/leucine dehydrogenase	E	Bacteria	Firmicutes	Clostridia	Clostridiales
EMXCSDTVEER	COG0574 Phosphoenolpyruvate synthase/pyruvate phosphate dikinase	G	Bacteria	Firmicutes	Clostridia	Clostridiales
HTHXVTGXPDTYGR	COG1882 Pyruvate-formate lyase	C	Bacteria	Firmicutes	Clostridia	Clostridiales
HTHXVTGXPDTYGR	COG1882 Pyruvate-formate lyase	C	Bacteria	Firmicutes	Clostridia	Clostridiales
GSYEGVXTGK	COG0334 Glutamate dehydrogenase/leucine dehydrogenase	E	Bacteria	Firmicutes	Clostridia	Clostridiales
FAADPEVVGPNAK	COG0126 3-phosphoglycerate kinase	G	Bacteria	Firmicutes	Clostridia	Clostridiales
FXNAYYDAK	COG0574 Phosphoenolpyruvate synthase/pyruvate phosphate dikinase	G	Bacteria	Firmicutes	Clostridia	Clostridiales
QXXSDXQDGTFAK	COG0059 Ketol-acid reductoisomerase	EH	Bacteria	Firmicutes	Clostridia	Clostridiales
GTPCXVAVEQDATGK	COG0059 Ketol-acid reductoisomerase	EH	Bacteria	Firmicutes	Clostridia	Clostridiales
VPWVDDNGKVQVNR	COG0334 Glutamate dehydrogenase/leucine dehydrogenase	E	Bacteria	Firmicutes	Clostridia	Clostridiales
VSYPXNHXKNXVRPXSSAPAAK	COG1866 Phosphoenolpyruvate carboxykinase (ATP)	C	Bacteria	Firmicutes	Clostridia	Clostridiales
AXAYGXAXGGAR	COG0059 Ketol-acid reductoisomerase	EH	Bacteria	Firmicutes	Clostridia	Clostridiales
YSXSNTAEYGDYVTGPK	COG0059 Ketol-acid reductoisomerase	EH	Bacteria	Firmicutes	Clostridia	Clostridiales
YSXSNTAEYGDYVTGPK	COG0059 Ketol-acid reductoisomerase	EH	Bacteria	Firmicutes	Clostridia	Clostridiales
YXGADVDVPAGDXGTGAR	COG0334 Glutamate dehydrogenase/leucine dehydrogenase	E	Bacteria	Firmicutes	Clostridia	Clostridiales
VXDGAVGVFDAK	COG0480 Translation elongation factors (GTPases)	J	Bacteria	Firmicutes	Clostridia	Clostridiales
YXQENGVXFVGGK	COG0334 Glutamate dehydrogenase/leucine dehydrogenase	E	Bacteria	Firmicutes	Clostridia	Clostridiales
XYEAXEGNPVTXR	COG0574 Phosphoenolpyruvate synthase/pyruvate phosphate dikinase	G	Bacteria	Firmicutes	Clostridia	Clostridiales
VXDXDKDSEPDXYNAXK	COG1866 Phosphoenolpyruvate carboxykinase (ATP)	C	Bacteria	Firmicutes	Clostridia	Clostridiales
VYSGDXAAAVGFK	COG0480 Translation elongation factors (GTPases)	J	Bacteria	Firmicutes	Clostridia	Clostridiales
AXYEAXEGNPVTXR	COG0574 Phosphoenolpyruvate synthase/pyruvate phosphate dikinase	G	Bacteria	Firmicutes	Clostridia	Clostridiales
GNPTVEAEVYXADGTVGR	COG0148 Enolase	G	Bacteria	Firmicutes	Clostridia	Clostridiales
XXYDFXDQSK	COG1932 Phosphoserine aminotransferase	HE	Bacteria	Firmicutes	Clostridia	Clostridiales
FXDPPXHEFVPTEEADXEK	COG0574 Phosphoenolpyruvate synthase/pyruvate phosphate dikinase	G	Bacteria	Firmicutes	Clostridia	Clostridiales
VDXAXPCATQNEXDXEDAK	COG0334 Glutamate dehydrogenase/leucine dehydrogenase	E	Bacteria	Firmicutes	Clostridia	Clostridiales
EAXEXXVEAXK	COG0148 Enolase	G	Bacteria	Firmicutes	Clostridia	Clostridiales
XGFXGGMAVPAVXR	COG1744 Uncharacterized ABC-type transport system, periplasmic component/surface lipoprotein	R	Bacteria	Firmicutes	Clostridia	Clostridiales
GXXDAXXSGAXNEAPTKK	COG1866 Phosphoenolpyruvate carboxykinase (ATP)	C	Bacteria	Firmicutes	Clostridia	Clostridiales
GXXDAXXSGAXNEAPTKK	COG1866 Phosphoenolpyruvate carboxykinase (ATP)	C	Bacteria	Firmicutes	Clostridia	Clostridiales
GXXDXFEMK	COG0480 Translation elongation factors (GTPases)	J	Bacteria	Firmicutes	Clostridia	Clostridiales
GXMETXYANXSDAAK	COG0334 Glutamate dehydrogenase/leucine dehydrogenase	E	Bacteria	Firmicutes	Clostridia	Clostridiales
GXMETXYANXSDAAK	COG0334 Glutamate dehydrogenase/leucine dehydrogenase	E	Bacteria	Firmicutes	Clostridia	Clostridiales
EXDFXGNAVNNPERPFVAXXGGAK	COG0126 3-phosphoglycerate kinase	G	Bacteria	Firmicutes	Clostridia	Clostridiales
XGXAAQAXGXAEGAXER	COG1960 Acyl-CoA dehydrogenases	I	Bacteria	Firmicutes	Clostridia	Clostridiales
AGXPXEVPAXTXNVVCGSGXK	COG0183 Acetyl-CoA acetyltransferase	I	Bacteria	Firmicutes	Clostridia	Clostridiales
WCAEVFHAXAAXXK	COG0148 Enolase	G	Bacteria	Firmicutes	Clostridia	Clostridiales
AWTPFAPGANPSYGAETSGXXASXNSVAK	COG1882 Pyruvate-formate lyase	C	Bacteria	Firmicutes	Clostridia	Clostridiales
GXXDAXXSGAXNEAPTK	COG1866 Phosphoenolpyruvate carboxykinase (ATP)	C	Bacteria	Firmicutes	Clostridia	Clostridiales
GXXDAXXSGAXNEAPTK	COG1866 Phosphoenolpyruvate carboxykinase (ATP)	C	Bacteria	Firmicutes	Clostridia	Clostridiales
TQATGYGXXYXTNAXWK	COG0334 Glutamate dehydrogenase/leucine dehydrogenase	E	Bacteria	Firmicutes	Clostridia	Clostridiales
EXDFXGNAVENPVRPFVAXXGGAK	COG0126 3-phosphoglycerate kinase	G	Bacteria	Firmicutes	Clostridia	Clostridiales
TEATGYGXXYXTNAXXK	COG0334 Glutamate dehydrogenase/leucine dehydrogenase	E	Bacteria	Firmicutes	Clostridia	Clostridiales
ADMTQAVXEGVAFAXR	COG1070 Sugar (pentulose and hexulose) kinases	G	Bacteria	Firmicutes	Clostridia	Clostridiales
TEATGYGXXYXTEEXXK	COG0334 Glutamate dehydrogenase/leucine dehydrogenase	E	Bacteria	Firmicutes	Clostridia	Clostridiales
XSNXQEXXPXXEQXVQSGAK	COG0459 Chaperonin GroEL (HSP60 family)	O	Bacteria	Firmicutes	Clostridia	Clostridiales
XVRPXSAAPAAK	COG1866 Phosphoenolpyruvate carboxykinase (ATP)	C	Bacteria	Firmicutes	Clostridia	Clostridiales
XREEXADQXK	COG1882 Pyruvate-formate lyase	C	Bacteria	Firmicutes	Clostridia	Clostridiales
GDPENXDAQYR	COG1879 ABC-type sugar transport system, periplasmic component	G	Bacteria	Firmicutes	Clostridia	Clostridiales
VVAQNPGEPEFHQAVK	COG0334 Glutamate dehydrogenase/leucine dehydrogenase	E	Bacteria	Firmicutes	Clostridia	Clostridiales
HTHXVTGXPDTYGR	COG1882 Pyruvate-formate lyase	C	Bacteria	Firmicutes	Clostridia	Clostridiales
HTHXVTGXPDTYGR	COG1882 Pyruvate-formate lyase	C	Bacteria	Firmicutes	Clostridia	Clostridiales
GSYEGVXTGK	COG0334 Glutamate dehydrogenase/leucine dehydrogenase	E	Bacteria	Firmicutes	Clostridia	Clostridiales
MGCVXQAAQGQNVAR	COG0183 Acetyl-CoA acetyltransferase	I	Bacteria	Firmicutes	Clostridia	Clostridiales
FAADPEVVGPNAK	COG0126 3-phosphoglycerate kinase	G	Bacteria	Firmicutes	Clostridia	Clostridiales
FXNAYYDAK	COG0574 Phosphoenolpyruvate synthase/pyruvate phosphate dikinase	G	Bacteria	Firmicutes	Clostridia	Clostridiales
KXGAFGXTEPGAGTDAQGQQTK	COG1960 Acyl-CoA dehydrogenases	I	Bacteria	Firmicutes	Clostridia	Clostridiales
DTYADASEWETK	COG1866 Phosphoenolpyruvate carboxykinase (ATP)	C	Bacteria	Firmicutes	Clostridia	Clostridiales
GXYEGVXTGK	COG0334 Glutamate dehydrogenase/leucine dehydrogenase	E	Bacteria	Firmicutes	Clostridia	Clostridiales
YXGADTDVPAGDXGTGAR	COG0334 Glutamate dehydrogenase/leucine dehydrogenase	E	Bacteria	Firmicutes	Clostridia	Clostridiales
AANAGGVATSAXEMSQNSQR	COG0334 Glutamate dehydrogenase/leucine dehydrogenase	E	Bacteria	Firmicutes	Clostridia	Clostridiales
VSYPXNHXTNXVKPVSSAPAAK	COG1866 Phosphoenolpyruvate carboxykinase (ATP)	C	Bacteria	Firmicutes	Clostridia	Clostridiales
GTPCXVAVEQDATGK	COG0059 Ketol-acid reductoisomerase	EH	Bacteria	Firmicutes	Clostridia	Clostridiales
AXAYGXAXGGAR	COG0059 Ketol-acid reductoisomerase	EH	Bacteria	Firmicutes	Clostridia	Clostridiales
YDDXXNXK	COG1879 ABC-type sugar transport system, periplasmic component	G	Bacteria	Firmicutes	Clostridia	Clostridiales
YSXSNTAEYGDYVTGPK	COG0059 Ketol-acid reductoisomerase	EH	Bacteria	Firmicutes	Clostridia	Clostridiales
YXGADVDVPAGDXGTGAR	COG0334 Glutamate dehydrogenase/leucine dehydrogenase	E	Bacteria	Firmicutes	Clostridia	Clostridiales
XAGGFTDTSXTNPYGDGK	NO HITS		Bacteria	Firmicutes	Clostridia	Clostridiales
YXQENGVXFVGGK	COG0334 Glutamate dehydrogenase/leucine dehydrogenase	E	Bacteria	Firmicutes	Clostridia	Clostridiales
XYEAXEGNPVTXR	COG0574 Phosphoenolpyruvate synthase/pyruvate phosphate dikinase	G	Bacteria	Firmicutes	Clostridia	Clostridiales
NYQAXVTHFGDXGAXK	COG2160 L-arabinose isomerase	G	Bacteria	Firmicutes	Clostridia	Clostridiales
FTTVVQXGXGGSDXGPR	COG0166 Glucose-6-phosphate isomerase	G	Bacteria	Firmicutes	Clostridia	Clostridiales
FXDPPXHEFVPTEEADXEK	COG0574 Phosphoenolpyruvate synthase/pyruvate phosphate dikinase	G	Bacteria	Firmicutes	Clostridia	Clostridiales
FXDPPXHEFVPTEEADXEK	COG0574 Phosphoenolpyruvate synthase/pyruvate phosphate dikinase	G	Bacteria	Firmicutes	Clostridia	Clostridiales
XFNVNWFK	COG1274 Phosphoenolpyruvate carboxykinase (GTP)	C	Bacteria	Firmicutes	Clostridia	Clostridiales
VXNXYCWNEEFK	COG1653 ABC-type sugar transport system, periplasmic component	G	Bacteria	Firmicutes	Clostridia	Clostridiales
VXNXYSWNDEFR	COG1653 ABC-type sugar transport system, periplasmic component	G	Bacteria	Firmicutes	Clostridia	Clostridiales
XTEAEAQEXXDHFTMK	COG1882 Pyruvate-formate lyase	C	Bacteria	Firmicutes	Clostridia	Clostridiales
EAXEXXVEAXK	COG0148 Enolase	G	Bacteria	Firmicutes	Clostridia	Clostridiales
XGFXGGMAVPAVXR	COG1744 Uncharacterized ABC-type transport system, periplasmic component/surface lipoprotein	R	Bacteria	Firmicutes	Clostridia	Clostridiales
GXXDAXXSGAXNEAPTKK	COG1866 Phosphoenolpyruvate carboxykinase (ATP)	C	Bacteria	Firmicutes	Clostridia	Clostridiales
GXXDAXXSGAXNEAPTKK	COG1866 Phosphoenolpyruvate carboxykinase (ATP)	C	Bacteria	Firmicutes	Clostridia	Clostridiales
GXMETXYANXSDAAK	COG0334 Glutamate dehydrogenase/leucine dehydrogenase	E	Bacteria	Firmicutes	Clostridia	Clostridiales
EXDFXGNAVNNPERPFVAXXGGAK	COG0126 3-phosphoglycerate kinase	G	Bacteria	Firmicutes	Clostridia	Clostridiales
ADDAXWXFPTVYK	COG3459 Cellobiose phosphorylase	G	Bacteria	Firmicutes	Clostridia	Clostridiales
AGXPXEVPAXTXNVVCGSGXK	COG0183 Acetyl-CoA acetyltransferase	I	Bacteria	Firmicutes	Clostridia	Clostridiales
WCAEVFHAXAAXXK	COG0148 Enolase	G	Bacteria	Firmicutes	Clostridia	Clostridiales
GXXDAXXSGAXNEAPTK	COG1866 Phosphoenolpyruvate carboxykinase (ATP)	C	Bacteria	Firmicutes	Clostridia	Clostridiales
WCAEVFHAXAAXXK	COG0148 Enolase	G	Bacteria	Firmicutes	Clostridia	Clostridiales
TQATGYGXXYXTNAXWK	COG0334 Glutamate dehydrogenase/leucine dehydrogenase	E	Bacteria	Firmicutes	Clostridia	Clostridiales
NXXENPDMXDAXXGVYER	COG0166 Glucose-6-phosphate isomerase	G	Bacteria	Firmicutes	Clostridia	Clostridiales
ADMTQAVXEGVAFAXR	COG1070 Sugar (pentulose and hexulose) kinases	G	Bacteria	Firmicutes	Clostridia	Clostridiales
XTNXDXPVAFASAFEGEXXR	COG1152 CO dehydrogenase/acetyl-CoA synthase alpha subunit;COG1614 CO dehydrogenase/acetyl-CoA synthase beta subunit [C]	C	Bacteria	Firmicutes	Clostridia	Clostridiales
XVRPXSAAPAAK	COG1866 Phosphoenolpyruvate carboxykinase (ATP)	C	Bacteria	Firmicutes	Clostridia	Clostridiales
XREEXADQXK	COG1882 Pyruvate-formate lyase	C	Bacteria	Firmicutes	Clostridia	Clostridiales
GDPENXDAQYR	COG1879 ABC-type sugar transport system, periplasmic component	G	Bacteria	Firmicutes	Clostridia	Clostridiales
EMXCSDTVEER	COG0574 Phosphoenolpyruvate synthase/pyruvate phosphate dikinase	G	Bacteria	Firmicutes	Clostridia	Clostridiales
HTHXVTGXPDTYGR	COG1882 Pyruvate-formate lyase	C	Bacteria	Firmicutes	Clostridia	Clostridiales
HTHXVTGXPDTYGR	COG1882 Pyruvate-formate lyase	C	Bacteria	Firmicutes	Clostridia	Clostridiales
GSYEGVXTGK	COG0334 Glutamate dehydrogenase/leucine dehydrogenase	E	Bacteria	Firmicutes	Clostridia	Clostridiales
MGCVXQAAQGQNVAR	COG0183 Acetyl-CoA acetyltransferase	I	Bacteria	Firmicutes	Clostridia	Clostridiales
FAADPEVVGPNAK	COG0126 3-phosphoglycerate kinase	G	Bacteria	Firmicutes	Clostridia	Clostridiales
FXNAYYDAK	COG0574 Phosphoenolpyruvate synthase/pyruvate phosphate dikinase	G	Bacteria	Firmicutes	Clostridia	Clostridiales
KXGAFGXTEPGAGTDAQGQQTK	COG1960 Acyl-CoA dehydrogenases	I	Bacteria	Firmicutes	Clostridia	Clostridiales
DTYADASEWETK	COG1866 Phosphoenolpyruvate carboxykinase (ATP)	C	Bacteria	Firmicutes	Clostridia	Clostridiales
AANAGGVATSAXEMSQNSQR	COG0334 Glutamate dehydrogenase/leucine dehydrogenase	E	Bacteria	Firmicutes	Clostridia	Clostridiales
VSYPXNHXKNXVRPXSSAPAAK	COG1866 Phosphoenolpyruvate carboxykinase (ATP)	C	Bacteria	Firmicutes	Clostridia	Clostridiales
AXAYGXAXGGAR	COG0059 Ketol-acid reductoisomerase	EH	Bacteria	Firmicutes	Clostridia	Clostridiales
YSXSNTAEYGDYVTGPK	COG0059 Ketol-acid reductoisomerase	EH	Bacteria	Firmicutes	Clostridia	Clostridiales
YXGADVDVPAGDXGTGAR	COG0334 Glutamate dehydrogenase/leucine dehydrogenase	E	Bacteria	Firmicutes	Clostridia	Clostridiales
XYEAXEGNPVTXR	COG0574 Phosphoenolpyruvate synthase/pyruvate phosphate dikinase	G	Bacteria	Firmicutes	Clostridia	Clostridiales
VXDXDKDSEPDXYNAXK	COG1866 Phosphoenolpyruvate carboxykinase (ATP)	C	Bacteria	Firmicutes	Clostridia	Clostridiales
GAAPSGASTGEFEAXEXR	COG0148 Enolase	G	Bacteria	Firmicutes	Clostridia	Clostridiales
AXYEAXEGNPVTXR	COG0574 Phosphoenolpyruvate synthase/pyruvate phosphate dikinase	G	Bacteria	Firmicutes	Clostridia	Clostridiales
DSNQDVXGFVHQXPDR	COG3459 Cellobiose phosphorylase	G	Bacteria	Firmicutes	Clostridia	Clostridiales
EFXXDMSPAGR	COG0059 Ketol-acid reductoisomerase	EH	Bacteria	Firmicutes	Clostridia	Clostridiales
FTTVVQXGXGGSDXGPR	COG0166 Glucose-6-phosphate isomerase	G	Bacteria	Firmicutes	Clostridia	Clostridiales
FXDPPXHEFVPTEEADXEK	COG0574 Phosphoenolpyruvate synthase/pyruvate phosphate dikinase	G	Bacteria	Firmicutes	Clostridia	Clostridiales
VDXAXPCATQNEXDXEDAK	COG0334 Glutamate dehydrogenase/leucine dehydrogenase	E	Bacteria	Firmicutes	Clostridia	Clostridiales
VXNXYCWNEEFK	COG1653 ABC-type sugar transport system, periplasmic component	G	Bacteria	Firmicutes	Clostridia	Clostridiales
NVXGYPSTAVXPYSQAXSR	COG0166 Glucose-6-phosphate isomerase	G	Bacteria	Firmicutes	Clostridia	Clostridiales
XTEAEAQEXXDHFTMK	COG1882 Pyruvate-formate lyase	C	Bacteria	Firmicutes	Clostridia	Clostridiales
EAXEXXVEAXK	COG0148 Enolase	G	Bacteria	Firmicutes	Clostridia	Clostridiales
XGFXGGMAVPAVXR	COG1744 Uncharacterized ABC-type transport system, periplasmic component/surface lipoprotein	R	Bacteria	Firmicutes	Clostridia	Clostridiales
GXXDAXXSGAXNEAPTKK	COG1866 Phosphoenolpyruvate carboxykinase (ATP)	C	Bacteria	Firmicutes	Clostridia	Clostridiales
GXXDAXXSGAXNEAPTKK	COG1866 Phosphoenolpyruvate carboxykinase (ATP)	C	Bacteria	Firmicutes	Clostridia	Clostridiales
GXXDXFEMK	COG0480 Translation elongation factors (GTPases)	J	Bacteria	Firmicutes	Clostridia	Clostridiales
MDXXGANFYGAVDQXR	COG0480 Translation elongation factors (GTPases)	J	Bacteria	Firmicutes	Clostridia	Clostridiales
GXMETXYANXSDAAK	COG0334 Glutamate dehydrogenase/leucine dehydrogenase	E	Bacteria	Firmicutes	Clostridia	Clostridiales
EXDFXGNAVNNPERPFVAXXGGAK	COG0126 3-phosphoglycerate kinase	G	Bacteria	Firmicutes	Clostridia	Clostridiales
XGXAAQAXGXAEGAXER	COG1960 Acyl-CoA dehydrogenases	I	Bacteria	Firmicutes	Clostridia	Clostridiales
WCAEVFHAXAAXXK	COG0148 Enolase	G	Bacteria	Firmicutes	Clostridia	Clostridiales
GXXDAXXSGAXNEAPTK	COG1866 Phosphoenolpyruvate carboxykinase (ATP)	C	Bacteria	Firmicutes	Clostridia	Clostridiales
TQATGYGXXYXTNAXWK	COG0334 Glutamate dehydrogenase/leucine dehydrogenase	E	Bacteria	Firmicutes	Clostridia	Clostridiales
EMXNPTSAXAGMGXGSSVAXXTDGR	COG0129 Dihydroxyacid dehydratase/phosphogluconate dehydratase	EG	Bacteria	Firmicutes	Clostridia	Clostridiales
EXDFXGNAVENPVRPFVAXXGGAK	COG0126 3-phosphoglycerate kinase	G	Bacteria	Firmicutes	Clostridia	Clostridiales
TEATGYGXXYXTNAXXK	COG0334 Glutamate dehydrogenase/leucine dehydrogenase	E	Bacteria	Firmicutes	Clostridia	Clostridiales
EFEPYEVVATTYQAXSGAGK	COG0136 Aspartate-semialdehyde dehydrogenase	E	Bacteria	Firmicutes	Clostridia	Clostridiales
ADMTQAVXEGVAFAXR	COG1070 Sugar (pentulose and hexulose) kinases	G	Bacteria	Firmicutes	Clostridia	Clostridiales
ADMTQAVXEGVAFAXR	COG1070 Sugar (pentulose and hexulose) kinases	G	Bacteria	Firmicutes	Clostridia	Clostridiales
TEATGYGXXYXTEEMXK	COG0334 Glutamate dehydrogenase/leucine dehydrogenase	E	Bacteria	Firmicutes	Clostridia	Clostridiales
AVADXXAXXSXGXK	COG1151 6Fe-6S prismane cluster-containing protein	C	Bacteria	Firmicutes	Clostridia	Clostridiales
XSNXQEXXPXXEQXVQSGAK	COG0459 Chaperonin GroEL (HSP60 family)	O	Bacteria	Firmicutes	Clostridia	Clostridiales
XVRPXSAAPAAK	COG1866 Phosphoenolpyruvate carboxykinase (ATP)	C	Bacteria	Firmicutes	Clostridia	Clostridiales
HVENXTQVYK	COG2759 Formyltetrahydrofolate synthetase	F	Bacteria	Firmicutes	Clostridia	Clostridiales
XREEXADQXK	COG1882 Pyruvate-formate lyase	C	Bacteria	Firmicutes	Clostridia	Clostridiales
GDPENXDAQYR	COG1879 ABC-type sugar transport system, periplasmic component	G	Bacteria	Firmicutes	Clostridia	Clostridiales
GDPENXDAQYR	COG1879 ABC-type sugar transport system, periplasmic component	G	Bacteria	Firmicutes	Clostridia	Clostridiales
VVAQNPGEPEFHQAVK	COG0334 Glutamate dehydrogenase/leucine dehydrogenase	E	Bacteria	Firmicutes	Clostridia	Clostridiales
XRGSYEGVXTGK	COG0334 Glutamate dehydrogenase/leucine dehydrogenase	E	Bacteria	Firmicutes	Clostridia	Clostridiales
XRGSYEGVXTGK	COG0334 Glutamate dehydrogenase/leucine dehydrogenase	E	Bacteria	Firmicutes	Clostridia	Clostridiales
EMXCSDTVEER	COG0574 Phosphoenolpyruvate synthase/pyruvate phosphate dikinase	G	Bacteria	Firmicutes	Clostridia	Clostridiales
HTHXVTGXPDTYGR	COG1882 Pyruvate-formate lyase	C	Bacteria	Firmicutes	Clostridia	Clostridiales
GSYEGVXTGK	COG0334 Glutamate dehydrogenase/leucine dehydrogenase	E	Bacteria	Firmicutes	Clostridia	Clostridiales
[truncated: 3,061 more rows]

## Sheet: A2
Peptide	COG	Functional category	Group	Phylum	Class	Order	Family	Genus	Species
YSDPEDEAXAK	COG2115 Xylose isomerase	G	Bacteria	Actinobacteria	Actinobacteria	Bifidobacteriales	Bifidobacteriaceae	Bifidobacterium	Bifidobacterium adolescentis
XADAGXVAVGHR	COG0282 Acetate kinase	C	Bacteria	Actinobacteria	Actinobacteria	Bifidobacteriales	Bifidobacteriaceae	Bifidobacterium	Bifidobacterium adolescentis
XGAANSXXVK	COG0148 Enolase	G	Bacteria	Actinobacteria	Actinobacteria	Bifidobacteriales	Bifidobacteriaceae	Bifidobacterium	Bifidobacterium adolescentis
RTSFTAEDXFR	COG2115 Xylose isomerase	G	Bacteria	Actinobacteria	Actinobacteria	Bifidobacteriales	Bifidobacteriaceae	Bifidobacterium	Bifidobacterium adolescentis
RTSFTAEDXFR	COG2115 Xylose isomerase	G	Bacteria	Actinobacteria	Actinobacteria	Bifidobacteriales	Bifidobacteriaceae	Bifidobacterium	Bifidobacterium adolescentis
TYDXMDVFK	COG2115 Xylose isomerase	G	Bacteria	Actinobacteria	Actinobacteria	Bifidobacteriales	Bifidobacteriaceae	Bifidobacterium	Bifidobacterium adolescentis
YSDPEDEAXAKVDYAFEFFQK	COG2115 Xylose isomerase	G	Bacteria	Actinobacteria	Actinobacteria	Bifidobacteriales	Bifidobacteriaceae	Bifidobacterium	Bifidobacterium adolescentis
YSDPEDEAXAK	COG2115 Xylose isomerase	G	Bacteria	Actinobacteria	Actinobacteria	Bifidobacteriales	Bifidobacteriaceae	Bifidobacterium	Bifidobacterium adolescentis
XADAGXVAVGHR	COG0282 Acetate kinase	C	Bacteria	Actinobacteria	Actinobacteria	Bifidobacteriales	Bifidobacteriaceae	Bifidobacterium	Bifidobacterium adolescentis
XGAANSXXVK	COG0148 Enolase	G	Bacteria	Actinobacteria	Actinobacteria	Bifidobacteriales	Bifidobacteriaceae	Bifidobacterium	Bifidobacterium adolescentis
RTSFTAEDXFR	COG2115 Xylose isomerase	G	Bacteria	Actinobacteria	Actinobacteria	Bifidobacteriales	Bifidobacteriaceae	Bifidobacterium	Bifidobacterium adolescentis
RTSFTAEDXFR	COG2115 Xylose isomerase	G	Bacteria	Actinobacteria	Actinobacteria	Bifidobacteriales	Bifidobacteriaceae	Bifidobacterium	Bifidobacterium adolescentis
AKEPTMFQYDFDAATAXNFXR	COG2115 Xylose isomerase	G	Bacteria	Actinobacteria	Actinobacteria	Bifidobacteriales	Bifidobacteriaceae	Bifidobacterium	Bifidobacterium adolescentis
YSDPEDEAXAKVDYAFEFFQK	COG2115 Xylose isomerase	G	Bacteria	Actinobacteria	Actinobacteria	Bifidobacteriales	Bifidobacteriaceae	Bifidobacterium	Bifidobacterium adolescentis
XGANAXXGVSXAAXYASAESADQPXYR	COG0148 Enolase	G	Bacteria	Actinobacteria	Actinobacteria	Bifidobacteriales	Bifidobacteriaceae	Bifidobacterium	Bifidobacterium adolescentis
YSDPEDEAXAK	COG2115 Xylose isomerase	G	Bacteria	Actinobacteria	Actinobacteria	Bifidobacteriales	Bifidobacteriaceae	Bifidobacterium	Bifidobacterium adolescentis
XGAANSXXVK	COG0148 Enolase	G	Bacteria	Actinobacteria	Actinobacteria	Bifidobacteriales	Bifidobacteriaceae	Bifidobacterium	Bifidobacterium adolescentis
QGXNTGXGDEGGFAPK	COG0148 Enolase	G	Bacteria	Actinobacteria	Actinobacteria	Bifidobacteriales	Bifidobacteriaceae	Bifidobacterium	Bifidobacterium adolescentis
RTSFTAEDXFR	COG2115 Xylose isomerase	G	Bacteria	Actinobacteria	Actinobacteria	Bifidobacteriales	Bifidobacteriaceae	Bifidobacterium	Bifidobacterium adolescentis
RTSFTAEDXFR	COG2115 Xylose isomerase	G	Bacteria	Actinobacteria	Actinobacteria	Bifidobacteriales	Bifidobacteriaceae	Bifidobacterium	Bifidobacterium adolescentis
VXXSAPAKDETTPTXVFGVNHETXK	COG0057 Glyceraldehyde-3-phosphate dehydrogenase/erythrose-4-phosphate dehydrogenase	G	Bacteria	Actinobacteria	Actinobacteria	Bifidobacteriales	Bifidobacteriaceae	Bifidobacterium	Bifidobacterium adolescentis
XAGVEXAVXDENTNAR	COG2160 L-arabinose isomerase	G	Bacteria	Actinobacteria	Actinobacteria	Bifidobacteriales	Bifidobacteriaceae	Bifidobacterium	Bifidobacterium adolescentis
VFGASXNTWAVNDXVAAYEK	COG2160 L-arabinose isomerase	G	Bacteria	Actinobacteria	Actinobacteria	Bifidobacteriales	Bifidobacteriaceae	Bifidobacterium	Bifidobacterium adolescentis
YSDPEDEAXAKVDYAFEFFQK	COG2115 Xylose isomerase	G	Bacteria	Actinobacteria	Actinobacteria	Bifidobacteriales	Bifidobacteriaceae	Bifidobacterium	Bifidobacterium adolescentis
XGANAXXGVSXAAXYASAESADQPXYR	COG0148 Enolase	G	Bacteria	Actinobacteria	Actinobacteria	Bifidobacteriales	Bifidobacteriaceae	Bifidobacterium	Bifidobacterium adolescentis
YSDPEDEAXAK	COG2115 Xylose isomerase	G	Bacteria	Actinobacteria	Actinobacteria	Bifidobacteriales	Bifidobacteriaceae	Bifidobacterium	Bifidobacterium adolescentis
XGAANSXXVK	COG0148 Enolase	G	Bacteria	Actinobacteria	Actinobacteria	Bifidobacteriales	Bifidobacteriaceae	Bifidobacterium	Bifidobacterium adolescentis
RTSFTAEDXFR	COG2115 Xylose isomerase	G	Bacteria	Actinobacteria	Actinobacteria	Bifidobacteriales	Bifidobacteriaceae	Bifidobacterium	Bifidobacterium adolescentis
TYDXMDVFK	COG2115 Xylose isomerase	G	Bacteria	Actinobacteria	Actinobacteria	Bifidobacteriales	Bifidobacteriaceae	Bifidobacterium	Bifidobacterium adolescentis
YSDPEDEAXAKVDYAFEFFQK	COG2115 Xylose isomerase	G	Bacteria	Actinobacteria	Actinobacteria	Bifidobacteriales	Bifidobacteriaceae	Bifidobacterium	Bifidobacterium adolescentis
XGANAXXGVSXAAXYASAESADQPXYR	COG0148 Enolase	G	Bacteria	Actinobacteria	Actinobacteria	Bifidobacteriales	Bifidobacteriaceae	Bifidobacterium	Bifidobacterium adolescentis
VNNXDRYEXQAEAXR	COG3957 Phosphoketolase	G	Bacteria	Actinobacteria	Actinobacteria	Bifidobacteriales	Bifidobacteriaceae	Bifidobacterium	Bifidobacterium adolescentis
AGXWDXDKXEYVGR	COG2115 Xylose isomerase	G	Bacteria	Actinobacteria	Actinobacteria	Bifidobacteriales	Bifidobacteriaceae	Bifidobacterium	Bifidobacterium animalis
AGXWDXDKXEYVGR	COG2115 Xylose isomerase	G	Bacteria	Actinobacteria	Actinobacteria	Bifidobacteriales	Bifidobacteriaceae	Bifidobacterium	Bifidobacterium animalis
VDYAFEFFTK	COG2115 Xylose isomerase	G	Bacteria	Actinobacteria	Actinobacteria	Bifidobacteriales	Bifidobacteriaceae	Bifidobacterium	Bifidobacterium animalis
AGXWDXDKXEYVGR	COG2115 Xylose isomerase	G	Bacteria	Actinobacteria	Actinobacteria	Bifidobacteriales	Bifidobacteriaceae	Bifidobacterium	Bifidobacterium animalis
VDYAFEFFTK	COG2115 Xylose isomerase	G	Bacteria	Actinobacteria	Actinobacteria	Bifidobacteriales	Bifidobacteriaceae	Bifidobacterium	Bifidobacterium animalis
TGPDGGSAVAVXK	COG1653 ABC-type sugar transport system, periplasmic component	G	Bacteria	Actinobacteria	Actinobacteria	Bifidobacteriales	Bifidobacteriaceae	Bifidobacterium	Bifidobacterium longum
AYGXPQDTGPXVYFYNK	COG1653 ABC-type sugar transport system, periplasmic component	G	Bacteria	Actinobacteria	Actinobacteria	Bifidobacteriales	Bifidobacteriaceae	Bifidobacterium	Bifidobacterium longum
XGXTEXPQTADEFXAAAK	COG1653 ABC-type sugar transport system, periplasmic component	G	Bacteria	Actinobacteria	Actinobacteria	Bifidobacteriales	Bifidobacteriaceae	Bifidobacterium	Bifidobacterium longum
GXXQDVTQYAEQYKNDFASGPYSXVQVGGK	COG1653 ABC-type sugar transport system, periplasmic component	G	Bacteria	Actinobacteria	Actinobacteria	Bifidobacteriales	Bifidobacteriaceae	Bifidobacterium	Bifidobacterium longum
TGPDGGSAVAVXK	COG1653 ABC-type sugar transport system, periplasmic component	G	Bacteria	Actinobacteria	Actinobacteria	Bifidobacteriales	Bifidobacteriaceae	Bifidobacterium	Bifidobacterium longum
AYGXPQDTGPXVYFYNK	COG1653 ABC-type sugar transport system, periplasmic component	G	Bacteria	Actinobacteria	Actinobacteria	Bifidobacteriales	Bifidobacteriaceae	Bifidobacterium	Bifidobacterium longum
TGPDGGSAVAVXK	COG1653 ABC-type sugar transport system, periplasmic component	G	Bacteria	Actinobacteria	Actinobacteria	Bifidobacteriales	Bifidobacteriaceae	Bifidobacterium	Bifidobacterium longum
VADXFSDAQTTSVDTXK	COG1653 ABC-type sugar transport system, periplasmic component	G	Bacteria	Actinobacteria	Actinobacteria	Bifidobacteriales	Bifidobacteriaceae	Bifidobacterium	Bifidobacterium longum
AYGXPQDTGPXVYFYNK	COG1653 ABC-type sugar transport system, periplasmic component	G	Bacteria	Actinobacteria	Actinobacteria	Bifidobacteriales	Bifidobacteriaceae	Bifidobacterium	Bifidobacterium longum
SGEAPDXAQVGYAEXPEVFTK	COG1653 ABC-type sugar transport system, periplasmic component	G	Bacteria	Actinobacteria	Actinobacteria	Bifidobacteriales	Bifidobacteriaceae	Bifidobacterium	Bifidobacterium longum
SHHEVAGAGQQEXNYR	COG0174 Glutamine synthetase	E	Bacteria	Actinobacteria	Actinobacteria	Bifidobacteriales	Bifidobacteriaceae	Bifidobacterium
XXEATKSDHXESVK	COG2115 Xylose isomerase	G	Bacteria	Actinobacteria	Actinobacteria	Bifidobacteriales	Bifidobacteriaceae	Bifidobacterium
AAAXNTXAHSTGAAK	COG0057 Glyceraldehyde-3-phosphate dehydrogenase/erythrose-4-phosphate dehydrogenase	G	Bacteria	Actinobacteria	Actinobacteria	Bifidobacteriales	Bifidobacteriaceae	Bifidobacterium
KVVVGHYTDPEVAEK	COG2160 L-arabinose isomerase	G	Bacteria	Actinobacteria	Actinobacteria	Bifidobacteriales	Bifidobacteriaceae	Bifidobacterium
XQASYEVTNK	COG3957 Phosphoketolase	G	Bacteria	Actinobacteria	Actinobacteria	Bifidobacteriales	Bifidobacteriaceae	Bifidobacterium
XGAEAVAGXKK	COG0021 Transketolase	G	Bacteria	Actinobacteria	Actinobacteria	Bifidobacteriales	Bifidobacteriaceae	Bifidobacterium
TEFKETEXDER	COG0021 Transketolase	G	Bacteria	Actinobacteria	Actinobacteria	Bifidobacteriales	Bifidobacteriaceae	Bifidobacterium
TEFKETEXDER	COG0021 Transketolase	G	Bacteria	Actinobacteria	Actinobacteria	Bifidobacteriales	Bifidobacteriaceae	Bifidobacterium
MHEDKVXENXQAER	COG2115 Xylose isomerase	G	Bacteria	Actinobacteria	Actinobacteria	Bifidobacteriales	Bifidobacteriaceae	Bifidobacterium
MHEDKVXENXQAER	COG2115 Xylose isomerase	G	Bacteria	Actinobacteria	Actinobacteria	Bifidobacteriales	Bifidobacteriaceae	Bifidobacterium
VQRPXWASTGTK	COG0176 Transaldolase	G	Bacteria	Actinobacteria	Actinobacteria	Bifidobacteriales	Bifidobacteriaceae	Bifidobacterium
MHEDKVXENXQAER	COG2115 Xylose isomerase	G	Bacteria	Actinobacteria	Actinobacteria	Bifidobacteriales	Bifidobacteriaceae	Bifidobacterium
MHEDKVXENXQAER	COG2115 Xylose isomerase	G	Bacteria	Actinobacteria	Actinobacteria	Bifidobacteriales	Bifidobacteriaceae	Bifidobacterium
XRDEYSGVXTGK	COG0334 Glutamate dehydrogenase/leucine dehydrogenase	E	Bacteria	Actinobacteria	Actinobacteria	Bifidobacteriales	Bifidobacteriaceae	Bifidobacterium
XRDEYSGVXTGK	COG0334 Glutamate dehydrogenase/leucine dehydrogenase	E	Bacteria	Actinobacteria	Actinobacteria	Bifidobacteriales	Bifidobacteriaceae	Bifidobacterium
EAGVXGSXDANQGDK	COG2115 Xylose isomerase	G	Bacteria	Actinobacteria	Actinobacteria	Bifidobacteriales	Bifidobacteriaceae	Bifidobacterium
HSSSVXAFTNPSXNSYHR	COG0174 Glutamine synthetase	E	Bacteria	Actinobacteria	Actinobacteria	Bifidobacteriales	Bifidobacteriaceae	Bifidobacterium
EXAEATDFVDGR	COG0176 Transaldolase	G	Bacteria	Actinobacteria	Actinobacteria	Bifidobacteriales	Bifidobacteriaceae	Bifidobacterium
SRXESGSXQDXXANK	COG0176 Transaldolase	G	Bacteria	Actinobacteria	Actinobacteria	Bifidobacteriales	Bifidobacteriaceae	Bifidobacterium
RTSFAAEDXFR	COG2115 Xylose isomerase	G	Bacteria	Actinobacteria	Actinobacteria	Bifidobacteriales	Bifidobacteriaceae	Bifidobacterium
TSFAAEDXFR	COG2115 Xylose isomerase	G	Bacteria	Actinobacteria	Actinobacteria	Bifidobacteriales	Bifidobacteriaceae	Bifidobacterium
GXWDVDKXEYVGR	COG2115 Xylose isomerase	G	Bacteria	Actinobacteria	Actinobacteria	Bifidobacteriales	Bifidobacteriaceae	Bifidobacterium
GXEVXTKPXXQXATQHHK	COG2160 L-arabinose isomerase	G	Bacteria	Actinobacteria	Actinobacteria	Bifidobacteriales	Bifidobacteriaceae	Bifidobacterium
XGNXTVXFDANR	COG0021 Transketolase	G	Bacteria	Actinobacteria	Actinobacteria	Bifidobacteriales	Bifidobacteriaceae	Bifidobacterium
AXDDXEATFEVGK	COG0021 Transketolase	G	Bacteria	Actinobacteria	Actinobacteria	Bifidobacteriales	Bifidobacteriaceae	Bifidobacterium
VDYAFEFFQK	COG2115 Xylose isomerase	G	Bacteria	Actinobacteria	Actinobacteria	Bifidobacteriales	Bifidobacteriaceae	Bifidobacterium
GXWDXDKXPYVGR	COG2115 Xylose isomerase	G	Bacteria	Actinobacteria	Actinobacteria	Bifidobacteriales	Bifidobacteriaceae	Bifidobacterium
AGGXTGXXGEXDR	COG0129 Dihydroxyacid dehydratase/phosphogluconate dehydratase	EG	Bacteria	Actinobacteria	Actinobacteria	Bifidobacteriales	Bifidobacteriaceae	Bifidobacterium
AYDXXDVFK	COG2115 Xylose isomerase	G	Bacteria	Actinobacteria	Actinobacteria	Bifidobacteriales	Bifidobacteriaceae	Bifidobacterium
NXXKPETXQXFANXAK	COG0166 Glucose-6-phosphate isomerase	G	Bacteria	Actinobacteria	Actinobacteria	Bifidobacteriales	Bifidobacteriaceae	Bifidobacterium
VXGFFDEFGPK	COG0282 Acetate kinase	C	Bacteria	Actinobacteria	Actinobacteria	Bifidobacteriales	Bifidobacteriaceae	Bifidobacterium
FVSGASTSPFADXYAYAGGQXK	COG2115 Xylose isomerase	G	Bacteria	Actinobacteria	Actinobacteria	Bifidobacteriales	Bifidobacteriaceae	Bifidobacterium
XQVPDGSVTEXTTVXNKEVTADEXNAAFK	COG0057 Glyceraldehyde-3-phosphate dehydrogenase/erythrose-4-phosphate dehydrogenase	G	Bacteria	Actinobacteria	Actinobacteria	Bifidobacteriales	Bifidobacteriaceae	Bifidobacterium
XNQXGTVTETXDAXEXATK	COG0148 Enolase	G	Bacteria	Actinobacteria	Actinobacteria	Bifidobacteriales	Bifidobacteriaceae	Bifidobacterium
XNQXGTVTETXDAXEXATK	COG0148 Enolase	G	Bacteria	Actinobacteria	Actinobacteria	Bifidobacteriales	Bifidobacteriaceae	Bifidobacterium
SWDTVXADVQAGXDRVNG	COG0176 Transaldolase	G	Bacteria	Actinobacteria	Actinobacteria	Bifidobacteriales	Bifidobacteriaceae	Bifidobacterium
AGEXPEGFDKAXDDXEATFEVGK	COG0021 Transketolase	G	Bacteria	Actinobacteria	Actinobacteria	Bifidobacteriales	Bifidobacteriaceae	Bifidobacterium
GGQAGDXEVAAXNDXTTPATXAYXXK	COG0057 Glyceraldehyde-3-phosphate dehydrogenase/erythrose-4-phosphate dehydrogenase	G	Bacteria	Actinobacteria	Actinobacteria	Bifidobacteriales	Bifidobacteriaceae	Bifidobacterium
XXEATKSDHXESVK	COG2115 Xylose isomerase	G	Bacteria	Actinobacteria	Actinobacteria	Bifidobacteriales	Bifidobacteriaceae	Bifidobacterium
XXEATKSDHXESVK	COG2115 Xylose isomerase	G	Bacteria	Actinobacteria	Actinobacteria	Bifidobacteriales	Bifidobacteriaceae	Bifidobacterium
AAAXNTXAHSTGAAK	COG0057 Glyceraldehyde-3-phosphate dehydrogenase/erythrose-4-phosphate dehydrogenase	G	Bacteria	Actinobacteria	Actinobacteria	Bifidobacteriales	Bifidobacteriaceae	Bifidobacterium
XGAEAVAGXKK	COG0021 Transketolase	G	Bacteria	Actinobacteria	Actinobacteria	Bifidobacteriales	Bifidobacteriaceae	Bifidobacterium
XGAEAVAGXKK	COG0021 Transketolase	G	Bacteria	Actinobacteria	Actinobacteria	Bifidobacteriales	Bifidobacteriaceae	Bifidobacterium
TEFKETEXDER	COG0021 Transketolase	G	Bacteria	Actinobacteria	Actinobacteria	Bifidobacteriales	Bifidobacteriaceae	Bifidobacterium
MHEDKVXENXQAER	COG2115 Xylose isomerase	G	Bacteria	Actinobacteria	Actinobacteria	Bifidobacteriales	Bifidobacteriaceae	Bifidobacterium
MHEDKVXENXQAER	COG2115 Xylose isomerase	G	Bacteria	Actinobacteria	Actinobacteria	Bifidobacteriales	Bifidobacteriaceae	Bifidobacterium
VQRPXWASTGTK	COG0176 Transaldolase	G	Bacteria	Actinobacteria	Actinobacteria	Bifidobacteriales	Bifidobacteriaceae	Bifidobacterium
MHEDKVXENXQAER	COG2115 Xylose isomerase	G	Bacteria	Actinobacteria	Actinobacteria	Bifidobacteriales	Bifidobacteriaceae	Bifidobacterium
XRDEYSGVXTGK	COG0334 Glutamate dehydrogenase/leucine dehydrogenase	E	Bacteria	Actinobacteria	Actinobacteria	Bifidobacteriales	Bifidobacteriaceae	Bifidobacterium
XRDEYSGVXTGK	COG0334 Glutamate dehydrogenase/leucine dehydrogenase	E	Bacteria	Actinobacteria	Actinobacteria	Bifidobacteriales	Bifidobacteriaceae	Bifidobacterium
ATEDSXXVDGKEYK	COG0057 Glyceraldehyde-3-phosphate dehydrogenase/erythrose-4-phosphate dehydrogenase	G	Bacteria	Actinobacteria	Actinobacteria	Bifidobacteriales	Bifidobacteriaceae	Bifidobacterium
AXHEVGPYDPQXK	COG0176 Transaldolase	G	Bacteria	Actinobacteria	Actinobacteria	Bifidobacteriales	Bifidobacteriaceae	Bifidobacterium
HYDEXQSEGXSXK	COG0166 Glucose-6-phosphate isomerase	G	Bacteria	Actinobacteria	Actinobacteria	Bifidobacteriales	Bifidobacteriaceae	Bifidobacterium
EAGVXGSXDANQGDK	COG2115 Xylose isomerase	G	Bacteria	Actinobacteria	Actinobacteria	Bifidobacteriales	Bifidobacteriaceae	Bifidobacterium
RTSFAAEDXFR	COG2115 Xylose isomerase	G	Bacteria	Actinobacteria	Actinobacteria	Bifidobacteriales	Bifidobacteriaceae	Bifidobacterium
EVTADEXNAAFK	COG0057 Glyceraldehyde-3-phosphate dehydrogenase/erythrose-4-phosphate dehydrogenase	G	Bacteria	Actinobacteria	Actinobacteria	Bifidobacteriales	Bifidobacteriaceae	Bifidobacterium
RTSFYEEDXFR	COG2115 Xylose isomerase	G	Bacteria	Actinobacteria	Actinobacteria	Bifidobacteriales	Bifidobacteriaceae	Bifidobacterium
XXDENWGXK	COG0057 Glyceraldehyde-3-phosphate dehydrogenase/erythrose-4-phosphate dehydrogenase	G	Bacteria	Actinobacteria	Actinobacteria	Bifidobacteriales	Bifidobacteriaceae	Bifidobacterium
TSFAAEDXFR	COG2115 Xylose isomerase	G	Bacteria	Actinobacteria	Actinobacteria	Bifidobacteriales	Bifidobacteriaceae	Bifidobacterium
GXEVXTKPXXQXATQHHK	COG2160 L-arabinose isomerase	G	Bacteria	Actinobacteria	Actinobacteria	Bifidobacteriales	Bifidobacteriaceae	Bifidobacterium
XGNXTVXFDANR	COG0021 Transketolase	G	Bacteria	Actinobacteria	Actinobacteria	Bifidobacteriales	Bifidobacteriaceae	Bifidobacterium
GXWDXDKXPYVGR	COG2115 Xylose isomerase	G	Bacteria	Actinobacteria	Actinobacteria	Bifidobacteriales	Bifidobacteriaceae	Bifidobacterium
AGGXTGXXGEXDR	COG0129 Dihydroxyacid dehydratase/phosphogluconate dehydratase	EG	Bacteria	Actinobacteria	Actinobacteria	Bifidobacteriales	Bifidobacteriaceae	Bifidobacterium
NXXKPETXQXFANXAK	COG0166 Glucose-6-phosphate isomerase	G	Bacteria	Actinobacteria	Actinobacteria	Bifidobacteriales	Bifidobacteriaceae	Bifidobacterium
VXGFFDEFGPK	COG0282 Acetate kinase	C	Bacteria	Actinobacteria	Actinobacteria	Bifidobacteriales	Bifidobacteriaceae	Bifidobacterium
FVSGASTSPFADXYAYAGGQXK	COG2115 Xylose isomerase	G	Bacteria	Actinobacteria	Actinobacteria	Bifidobacteriales	Bifidobacteriaceae	Bifidobacterium
XNQXGTVTETXDAXEXATK	COG0148 Enolase	G	Bacteria	Actinobacteria	Actinobacteria	Bifidobacteriales	Bifidobacteriaceae	Bifidobacterium
XNQXGTVTETXDAXEXATK	COG0148 Enolase	G	Bacteria	Actinobacteria	Actinobacteria	Bifidobacteriales	Bifidobacteriaceae	Bifidobacterium
AGEXPEGFDKAXDDXEATFEVGK	COG0021 Transketolase	G	Bacteria	Actinobacteria	Actinobacteria	Bifidobacteriales	Bifidobacteriaceae	Bifidobacterium
FAEXFETVFDEXCDXK	COG3957 Phosphoketolase	G	Bacteria	Actinobacteria	Actinobacteria	Bifidobacteriales	Bifidobacteriaceae	Bifidobacterium
SHHEVAGAGQQEXNYR	COG0174 Glutamine synthetase	E	Bacteria	Actinobacteria	Actinobacteria	Bifidobacteriales	Bifidobacteriaceae	Bifidobacterium
AAAXNTXPHSTGAAK	COG0057 Glyceraldehyde-3-phosphate dehydrogenase/erythrose-4-phosphate dehydrogenase	G	Bacteria	Actinobacteria	Actinobacteria	Bifidobacteriales	Bifidobacteriaceae	Bifidobacterium
XXEATKSDHXESVK	COG2115 Xylose isomerase	G	Bacteria	Actinobacteria	Actinobacteria	Bifidobacteriales	Bifidobacteriaceae	Bifidobacterium
AAAXNTXAHSTGAAK	COG0057 Glyceraldehyde-3-phosphate dehydrogenase/erythrose-4-phosphate dehydrogenase	G	Bacteria	Actinobacteria	Actinobacteria	Bifidobacteriales	Bifidobacteriaceae	Bifidobacterium
YDSTHGTFRHDDGTPVDVK	COG0057 Glyceraldehyde-3-phosphate dehydrogenase/erythrose-4-phosphate dehydrogenase	G	Bacteria	Actinobacteria	Actinobacteria	Bifidobacteriales	Bifidobacteriaceae	Bifidobacterium
KVVVGHYTDPEVAEK	COG2160 L-arabinose isomerase	G	Bacteria	Actinobacteria	Actinobacteria	Bifidobacteriales	Bifidobacteriaceae	Bifidobacterium
XGAEAVAGXKK	COG0021 Transketolase	G	Bacteria	Actinobacteria	Actinobacteria	Bifidobacteriales	Bifidobacteriaceae	Bifidobacterium
TEFKETEXDER	COG0021 Transketolase	G	Bacteria	Actinobacteria	Actinobacteria	Bifidobacteriales	Bifidobacteriaceae	Bifidobacterium
TEFKETEXDER	COG0021 Transketolase	G	Bacteria	Actinobacteria	Actinobacteria	Bifidobacteriales	Bifidobacteriaceae	Bifidobacterium
MHEDKVXENXQAER	COG2115 Xylose isomerase	G	Bacteria	Actinobacteria	Actinobacteria	Bifidobacteriales	Bifidobacteriaceae	Bifidobacterium
MHEDKVXENXQAER	COG2115 Xylose isomerase	G	Bacteria	Actinobacteria	Actinobacteria	Bifidobacteriales	Bifidobacteriaceae	Bifidobacterium
VQRPXWASTGTK	COG0176 Transaldolase	G	Bacteria	Actinobacteria	Actinobacteria	Bifidobacteriales	Bifidobacteriaceae	Bifidobacterium
MHEDKVXENXQAER	COG2115 Xylose isomerase	G	Bacteria	Actinobacteria	Actinobacteria	Bifidobacteriales	Bifidobacteriaceae	Bifidobacterium
MHEDKVXENXQAER	COG2115 Xylose isomerase	G	Bacteria	Actinobacteria	Actinobacteria	Bifidobacteriales	Bifidobacteriaceae	Bifidobacterium
XRDEYSGVXTGK	COG0334 Glutamate dehydrogenase/leucine dehydrogenase	E	Bacteria	Actinobacteria	Actinobacteria	Bifidobacteriales	Bifidobacteriaceae	Bifidobacterium
XRDEYSGVXTGK	COG0334 Glutamate dehydrogenase/leucine dehydrogenase	E	Bacteria	Actinobacteria	Actinobacteria	Bifidobacteriales	Bifidobacteriaceae	Bifidobacterium
ATEDSXXVDGKEYK	COG0057 Glyceraldehyde-3-phosphate dehydrogenase/erythrose-4-phosphate dehydrogenase	G	Bacteria	Actinobacteria	Actinobacteria	Bifidobacteriales	Bifidobacteriaceae	Bifidobacterium
EAGVXGSXDANQGDK	COG2115 Xylose isomerase	G	Bacteria	Actinobacteria	Actinobacteria	Bifidobacteriales	Bifidobacteriaceae	Bifidobacterium
RTSFAAEDXFR	COG2115 Xylose isomerase	G	Bacteria	Actinobacteria	Actinobacteria	Bifidobacteriales	Bifidobacteriaceae	Bifidobacterium
RTSFAAEDXFR	COG2115 Xylose isomerase	G	Bacteria	Actinobacteria	Actinobacteria	Bifidobacteriales	Bifidobacteriaceae	Bifidobacterium
RTSFYEEDXFR	COG2115 Xylose isomerase	G	Bacteria	Actinobacteria	Actinobacteria	Bifidobacteriales	Bifidobacteriaceae	Bifidobacterium
XAYEXFENK	COG0176 Transaldolase	G	Bacteria	Actinobacteria	Actinobacteria	Bifidobacteriales	Bifidobacteriaceae	Bifidobacterium
VVNVVDXVK	COG3957 Phosphoketolase	G	Bacteria	Actinobacteria	Actinobacteria	Bifidobacteriales	Bifidobacteriaceae	Bifidobacterium
XXDENWGXK	COG0057 Glyceraldehyde-3-phosphate dehydrogenase/erythrose-4-phosphate dehydrogenase	G	Bacteria	Actinobacteria	Actinobacteria	Bifidobacteriales	Bifidobacteriaceae	Bifidobacterium
DGDQPEFXQAVR	COG0334 Glutamate dehydrogenase/leucine dehydrogenase	E	Bacteria	Actinobacteria	Actinobacteria	Bifidobacteriales	Bifidobacteriaceae	Bifidobacterium
TSFAAEDXFR	COG2115 Xylose isomerase	G	Bacteria	Actinobacteria	Actinobacteria	Bifidobacteriales	Bifidobacteriaceae	Bifidobacterium
GXWDVDKXEYVGR	COG2115 Xylose isomerase	G	Bacteria	Actinobacteria	Actinobacteria	Bifidobacteriales	Bifidobacteriaceae	Bifidobacterium
XGNXTVXFDANR	COG0021 Transketolase	G	Bacteria	Actinobacteria	Actinobacteria	Bifidobacteriales	Bifidobacteriaceae	Bifidobacterium
VDYAFEFFQK	COG2115 Xylose isomerase	G	Bacteria	Actinobacteria	Actinobacteria	Bifidobacteriales	Bifidobacteriaceae	Bifidobacterium
GXWDXDKXPYVGR	COG2115 Xylose isomerase	G	Bacteria	Actinobacteria	Actinobacteria	Bifidobacteriales	Bifidobacteriaceae	Bifidobacterium
AGGXTGXXGEXDR	COG0129 Dihydroxyacid dehydratase/phosphogluconate dehydratase	EG	Bacteria	Actinobacteria	Actinobacteria	Bifidobacteriales	Bifidobacteriaceae	Bifidobacterium
VANYXSXGQXYXR	COG3957 Phosphoketolase	G	Bacteria	Actinobacteria	Actinobacteria	Bifidobacteriales	Bifidobacteriaceae	Bifidobacterium
VXGFFDEFGPK	COG0282 Acetate kinase	C	Bacteria	Actinobacteria	Actinobacteria	Bifidobacteriales	Bifidobacteriaceae	Bifidobacterium
FVSGASTSPFADXYAYAGGQXK	COG2115 Xylose isomerase	G	Bacteria	Actinobacteria	Actinobacteria	Bifidobacteriales	Bifidobacteriaceae	Bifidobacterium
FVSGASTSPFADXYAYAGGQXK	COG2115 Xylose isomerase	G	Bacteria	Actinobacteria	Actinobacteria	Bifidobacteriales	Bifidobacteriaceae	Bifidobacterium
XQVPDGSVTEXTTVXNKEVTADEXNAAFK	COG0057 Glyceraldehyde-3-phosphate dehydrogenase/erythrose-4-phosphate dehydrogenase	G	Bacteria	Actinobacteria	Actinobacteria	Bifidobacteriales	Bifidobacteriaceae	Bifidobacterium
XNQXGTVTETXDAXEXATK	COG0148 Enolase	G	Bacteria	Actinobacteria	Actinobacteria	Bifidobacteriales	Bifidobacteriaceae	Bifidobacterium
XNQXGTVTETXDAXEXATK	COG0148 Enolase	G	Bacteria	Actinobacteria	Actinobacteria	Bifidobacteriales	Bifidobacteriaceae	Bifidobacterium
AGEXPEGFDKAXDDXEATFEVGK	COG0021 Transketolase	G	Bacteria	Actinobacteria	Actinobacteria	Bifidobacteriales	Bifidobacteriaceae	Bifidobacterium
GGQAGDXEVAAXNDXTTPATXAYXXK	COG0057 Glyceraldehyde-3-phosphate dehydrogenase/erythrose-4-phosphate dehydrogenase	G	Bacteria	Actinobacteria	Actinobacteria	Bifidobacteriales	Bifidobacteriaceae	Bifidobacterium
FAEXFETVFDEXCDXK	COG3957 Phosphoketolase	G	Bacteria	Actinobacteria	Actinobacteria	Bifidobacteriales	Bifidobacteriaceae	Bifidobacterium
AAAXNTXPHSTGAAK	COG0057 Glyceraldehyde-3-phosphate dehydrogenase/erythrose-4-phosphate dehydrogenase	G	Bacteria	Actinobacteria	Actinobacteria	Bifidobacteriales	Bifidobacteriaceae	Bifidobacterium
XXEATKSDHXESVK	COG2115 Xylose isomerase	G	Bacteria	Actinobacteria	Actinobacteria	Bifidobacteriales	Bifidobacteriaceae	Bifidobacterium
XXEATKSDHXESVK	COG2115 Xylose isomerase	G	Bacteria	Actinobacteria	Actinobacteria	Bifidobacteriales	Bifidobacteriaceae	Bifidobacterium
AAAXNTXAHSTGAAK	COG0057 Glyceraldehyde-3-phosphate dehydrogenase/erythrose-4-phosphate dehydrogenase	G	Bacteria	Actinobacteria	Actinobacteria	Bifidobacteriales	Bifidobacteriaceae	Bifidobacterium
KVVVGHYTDPEVAEK	COG2160 L-arabinose isomerase	G	Bacteria	Actinobacteria	Actinobacteria	Bifidobacteriales	Bifidobacteriaceae	Bifidobacterium
XGAEAVAGXKK	COG0021 Transketolase	G	Bacteria	Actinobacteria	Actinobacteria	Bifidobacteriales	Bifidobacteriaceae	Bifidobacterium
TEFKETEXDER	COG0021 Transketolase	G	Bacteria	Actinobacteria	Actinobacteria	Bifidobacteriales	Bifidobacteriaceae	Bifidobacterium
MHEDKVXENXQAER	COG2115 Xylose isomerase	G	Bacteria	Actinobacteria	Actinobacteria	Bifidobacteriales	Bifidobacteriaceae	Bifidobacterium
MHEDKVXENXQAER	COG2115 Xylose isomerase	G	Bacteria	Actinobacteria	Actinobacteria	Bifidobacteriales	Bifidobacteriaceae	Bifidobacterium
MHEDKVXENXQAER	COG2115 Xylose isomerase	G	Bacteria	Actinobacteria	Actinobacteria	Bifidobacteriales	Bifidobacteriaceae	Bifidobacterium
XRDEYSGVXTGK	COG0334 Glutamate dehydrogenase/leucine dehydrogenase	E	Bacteria	Actinobacteria	Actinobacteria	Bifidobacteriales	Bifidobacteriaceae	Bifidobacterium
XRDEYSGVXTGK	COG0334 Glutamate dehydrogenase/leucine dehydrogenase	E	Bacteria	Actinobacteria	Actinobacteria	Bifidobacteriales	Bifidobacteriaceae	Bifidobacterium
RTSFAAEDXFR	COG2115 Xylose isomerase	G	Bacteria	Actinobacteria	Actinobacteria	Bifidobacteriales	Bifidobacteriaceae	Bifidobacterium
EVTADEXNAAFK	COG0057 Glyceraldehyde-3-phosphate dehydrogenase/erythrose-4-phosphate dehydrogenase	G	Bacteria	Actinobacteria	Actinobacteria	Bifidobacteriales	Bifidobacteriaceae	Bifidobacterium
XAYEXFENK	COG0176 Transaldolase	G	Bacteria	Actinobacteria	Actinobacteria	Bifidobacteriales	Bifidobacteriaceae	Bifidobacterium
VVNVVDXVK	COG3957 Phosphoketolase	G	Bacteria	Actinobacteria	Actinobacteria	Bifidobacteriales	Bifidobacteriaceae	Bifidobacterium
TSFAAEDXFR	COG2115 Xylose isomerase	G	Bacteria	Actinobacteria	Actinobacteria	Bifidobacteriales	Bifidobacteriaceae	Bifidobacterium
GXEVXTKPXXQXATQHHK	COG2160 L-arabinose isomerase	G	Bacteria	Actinobacteria	Actinobacteria	Bifidobacteriales	Bifidobacteriaceae	Bifidobacterium
XGNXTVXFDANR	COG0021 Transketolase	G	Bacteria	Actinobacteria	Actinobacteria	Bifidobacteriales	Bifidobacteriaceae	Bifidobacterium
GXWDXDKXPYVGR	COG2115 Xylose isomerase	G	Bacteria	Actinobacteria	Actinobacteria	Bifidobacteriales	Bifidobacteriaceae	Bifidobacterium
YQXVDXETGEGXASGXVEK	COG0282 Acetate kinase	C	Bacteria	Actinobacteria	Actinobacteria	Bifidobacteriales	Bifidobacteriaceae	Bifidobacterium
VXGFFDEFGPK	COG0282 Acetate kinase	C	Bacteria	Actinobacteria	Actinobacteria	Bifidobacteriales	Bifidobacteriaceae	Bifidobacterium
NXXKPETXQXFADXAK	COG0166 Glucose-6-phosphate isomerase	G	Bacteria	Actinobacteria	Actinobacteria	Bifidobacteriales	Bifidobacteriaceae	Bifidobacterium
FVSGASTSPFADXYAYAGGQXK	COG2115 Xylose isomerase	G	Bacteria	Actinobacteria	Actinobacteria	Bifidobacteriales	Bifidobacteriaceae	Bifidobacterium
XNQXGTVTETXDAXEXATK	COG0148 Enolase	G	Bacteria	Actinobacteria	Actinobacteria	Bifidobacteriales	Bifidobacteriaceae	Bifidobacterium
AGEXPEGFDKAXDDXEATFEVGK	COG0021 Transketolase	G	Bacteria	Actinobacteria	Actinobacteria	Bifidobacteriales	Bifidobacteriaceae	Bifidobacterium
GGQAGDXEVAAXNDXTTPATXAYXXK	COG0057 Glyceraldehyde-3-phosphate dehydrogenase/erythrose-4-phosphate dehydrogenase	G	Bacteria	Actinobacteria	Actinobacteria	Bifidobacteriales	Bifidobacteriaceae	Bifidobacterium
VQRPXWASTGTK	COG0176 Transaldolase	G	Bacteria	Actinobacteria	Actinobacteria	Bifidobacteriales	Bifidobacteriaceae	Bifidobacterium
EXAEATDFVDGR	COG0176 Transaldolase	G	Bacteria	Actinobacteria	Actinobacteria	Bifidobacteriales	Bifidobacteriaceae	Bifidobacterium
XAYEXFENK	COG0176 Transaldolase	G	Bacteria	Actinobacteria	Actinobacteria	Bifidobacteriales	Bifidobacteriaceae	Bifidobacterium
AGGXTGXXGEXDR	COG0129 Dihydroxyacid dehydratase/phosphogluconate dehydratase	EG	Bacteria	Actinobacteria	Actinobacteria	Bifidobacteriales	Bifidobacteriaceae	Bifidobacterium
VXGFFDEFGPK	COG0282 Acetate kinase	C	Bacteria	Actinobacteria	Actinobacteria	Bifidobacteriales	Bifidobacteriaceae	Bifidobacterium
XQASYEVTNK	COG3957 Phosphoketolase	G	Bacteria	Actinobacteria	Actinobacteria	Bifidobacteriales	Bifidobacteriaceae	Bifidobacterium
XGAEAVAGXKK	COG0021 Transketolase	G	Bacteria	Actinobacteria	Actinobacteria	Bifidobacteriales	Bifidobacteriaceae	Bifidobacterium
XQAAYDVTNK	COG3957 Phosphoketolase	G	Bacteria	Actinobacteria	Actinobacteria	Bifidobacteriales	Bifidobacteriaceae	Bifidobacterium
ASXAEVEAAK	COG0021 Transketolase	G	Bacteria	Actinobacteria	Actinobacteria	Bifidobacteriales	Bifidobacteriaceae	Bifidobacterium
TEFKETEXDER	COG0021 Transketolase	G	Bacteria	Actinobacteria	Actinobacteria	Bifidobacteriales	Bifidobacteriaceae	Bifidobacterium
AEXEAGAAEWK	COG3957 Phosphoketolase	G	Bacteria	Actinobacteria	Actinobacteria	Bifidobacteriales	Bifidobacteriaceae	Bifidobacterium
EVAEYGHGWGQXEATR	COG3957 Phosphoketolase	G	Bacteria	Actinobacteria	Actinobacteria	Bifidobacteriales	Bifidobacteriaceae	Bifidobacterium
XDRYEXTAEAXR	COG3957 Phosphoketolase	G	Bacteria	Actinobacteria	Actinobacteria	Bifidobacteriales	Bifidobacteriaceae	Bifidobacterium
VREEAVQAVHK	COG1454 Alcohol dehydrogenase, class IV	C	Bacteria	Actinobacteria	Actinobacteria	Bifidobacteriales	Bifidobacteriaceae	Bifidobacterium
AAAXNTXPHSTGAAK	COG0057 Glyceraldehyde-3-phosphate dehydrogenase/erythrose-4-phosphate dehydrogenase	G	Bacteria	Actinobacteria	Actinobacteria	Bifidobacteriales	Bifidobacteriaceae	Bifidobacterium
TVEKDXEXESK	COG1879 ABC-type sugar transport system, periplasmic component	G	Bacteria	Actinobacteria	Actinobacteria	Bifidobacteriales	Bifidobacteriaceae	Bifidobacterium
VQRPXWASTGTK	COG0176 Transaldolase	G	Bacteria	Actinobacteria	Actinobacteria	Bifidobacteriales	Bifidobacteriaceae	Bifidobacterium
TVTAGXXDKYK	COG1879 ABC-type sugar transport system, periplasmic component	G	Bacteria	Actinobacteria	Actinobacteria	Bifidobacteriales	Bifidobacteriaceae	Bifidobacterium
XAYEXFENK	COG0176 Transaldolase	G	Bacteria	Actinobacteria	Actinobacteria	Bifidobacteriales	Bifidobacteriaceae	Bifidobacterium
VVNVVDXVK	COG3957 Phosphoketolase	G	Bacteria	Actinobacteria	Actinobacteria	Bifidobacteriales	Bifidobacteriaceae	Bifidobacterium
VXHEEFPDVNPEYDFNQXDSAPEEAAR	COG0050 GTPases - translation elongation factors	J	Bacteria	Actinobacteria	Actinobacteria	Bifidobacteriales	Bifidobacteriaceae	Bifidobacterium
XEXVGATXNXXK	COG0039 Malate/lactate dehydrogenases	C	Bacteria	Actinobacteria	Actinobacteria	Bifidobacteriales	Bifidobacteriaceae	Bifidobacterium
VXGFFDEFGPK	COG0282 Acetate kinase	C	Bacteria	Actinobacteria	Actinobacteria	Bifidobacteriales	Bifidobacteriaceae	Bifidobacterium
YVVHETAAXAGK	COG0174 Glutamine synthetase	E	Bacteria	Actinobacteria	Actinobacteria	Bifidobacteriales	Bifidobacteriaceae
YVVHETAAXAGK	COG0174 Glutamine synthetase	E	Bacteria	Actinobacteria	Actinobacteria	Bifidobacteriales	Bifidobacteriaceae
XPXAGTSPAAK	COG0174 Glutamine synthetase	E	Bacteria	Actinobacteria	Actinobacteria	Bifidobacteriales	Bifidobacteriaceae
KXVVGHYTDPEVAEK	COG2160 L-arabinose isomerase	G	Bacteria	Actinobacteria	Actinobacteria	Bifidobacteriales	Bifidobacteriaceae
XGAEAVAGXK	COG0021 Transketolase	G	Bacteria	Actinobacteria	Actinobacteria	Bifidobacteriales	Bifidobacteriaceae
XQFVGDDXXVTNPAR	COG0148 Enolase	G	Bacteria	Actinobacteria	Actinobacteria	Bifidobacteriales	Bifidobacteriaceae
FTDXXGVQQHFTVPASEFXK	COG0174 Glutamine synthetase	E	Bacteria	Actinobacteria	Actinobacteria	Bifidobacteriales	Bifidobacteriaceae
STGXADTASFAPEAEFFXFDKVR	COG0174 Glutamine synthetase	E	Bacteria	Actinobacteria	Actinobacteria	Bifidobacteriales	Bifidobacteriaceae
GGQAGDXEVAAXNDXTTPSMXAYXXK	COG0057 Glyceraldehyde-3-phosphate dehydrogenase/erythrose-4-phosphate dehydrogenase	G	Bacteria	Actinobacteria	Actinobacteria	Bifidobacteriales	Bifidobacteriaceae
YVVHETAAXAGK	COG0174 Glutamine synthetase	E	Bacteria	Actinobacteria	Actinobacteria	Bifidobacteriales	Bifidobacteriaceae
YVVHETAAXAGK	COG0174 Glutamine synthetase	E	Bacteria	Actinobacteria	Actinobacteria	Bifidobacteriales	Bifidobacteriaceae
XPXAGTSPAAK	COG0174 Glutamine synthetase	E	Bacteria	Actinobacteria	Actinobacteria	Bifidobacteriales	Bifidobacteriaceae
KXVVGHYTDPEVAEK	COG2160 L-arabinose isomerase	G	Bacteria	Actinobacteria	Actinobacteria	Bifidobacteriales	Bifidobacteriaceae
XGAEAVAGXK	COG0021 Transketolase	G	Bacteria	Actinobacteria	Actinobacteria	Bifidobacteriales	Bifidobacteriaceae
XGDRXQFVGDDXXVTNPAR	COG0148 Enolase	G	Bacteria	Actinobacteria	Actinobacteria	Bifidobacteriales	Bifidobacteriaceae
XQFVGDDXXVTNPAR	COG0148 Enolase	G	Bacteria	Actinobacteria	Actinobacteria	Bifidobacteriales	Bifidobacteriaceae
XXWNTSSXFTNPR	COG2115 Xylose isomerase	G	Bacteria	Actinobacteria	Actinobacteria	Bifidobacteriales	Bifidobacteriaceae
FTDXXGVQQHFTVPASEFXK	COG0174 Glutamine synthetase	E	Bacteria	Actinobacteria	Actinobacteria	Bifidobacteriales	Bifidobacteriaceae
STGXADTASFAPEAEFFXFDKVR	COG0174 Glutamine synthetase	E	Bacteria	Actinobacteria	Actinobacteria	Bifidobacteriales	Bifidobacteriaceae
YVVHETAAXAGK	COG0174 Glutamine synthetase	E	Bacteria	Actinobacteria	Actinobacteria	Bifidobacteriales	Bifidobacteriaceae
YVVHETAAXAGK	COG0174 Glutamine synthetase	E	Bacteria	Actinobacteria	Actinobacteria	Bifidobacteriales	Bifidobacteriaceae
XPXAGTSPAAK	COG0174 Glutamine synthetase	E	Bacteria	Actinobacteria	Actinobacteria	Bifidobacteriales	Bifidobacteriaceae
XFEXQAR	COG0057 Glyceraldehyde-3-phosphate dehydrogenase/erythrose-4-phosphate dehydrogenase	G	Bacteria	Actinobacteria	Actinobacteria	Bifidobacteriales	Bifidobacteriaceae
XAYEXFEK	COG0176 Transaldolase	G	Bacteria	Actinobacteria	Actinobacteria	Bifidobacteriales	Bifidobacteriaceae
XXWNTSSXFTNPR	COG2115 Xylose isomerase	G	Bacteria	Actinobacteria	Actinobacteria	Bifidobacteriales	Bifidobacteriaceae
YQXVDXESGEGXASGXVEK	COG0282 Acetate kinase	C	Bacteria	Actinobacteria	Actinobacteria	Bifidobacteriales	Bifidobacteriaceae
FTDXXGVQQHFTVPASEFXK	COG0174 Glutamine synthetase	E	Bacteria	Actinobacteria	Actinobacteria	Bifidobacteriales	Bifidobacteriaceae
XPATXEGXPAXTATXAK	COG0176 Transaldolase	G	Bacteria	Actinobacteria	Actinobacteria	Bifidobacteriales	Bifidobacteriaceae
STGXADTASFAPEAEFFXFDKVR	COG0174 Glutamine synthetase	E	Bacteria	Actinobacteria	Actinobacteria	Bifidobacteriales	Bifidobacteriaceae
XSPTPXEYEXYFHX	COG0174 Glutamine synthetase	E	Bacteria	Actinobacteria	Actinobacteria	Bifidobacteriales	Bifidobacteriaceae
STGXADTASFAPEAEFFXFDK	COG0174 Glutamine synthetase	E	Bacteria	Actinobacteria	Actinobacteria	Bifidobacteriales	Bifidobacteriaceae
GGQAGDXEVAAXNDXTTPSMXAYXXK	COG0057 Glyceraldehyde-3-phosphate dehydrogenase/erythrose-4-phosphate dehydrogenase	G	Bacteria	Actinobacteria	Actinobacteria	Bifidobacteriales	Bifidobacteriaceae
YVVHETAAXAGK	COG0174 Glutamine synthetase	E	Bacteria	Actinobacteria	Actinobacteria	Bifidobacteriales	Bifidobacteriaceae
YVVHETAAXAGK	COG0174 Glutamine synthetase	E	Bacteria	Actinobacteria	Actinobacteria	Bifidobacteriales	Bifidobacteriaceae
XPXAGTSPAAK	COG0174 Glutamine synthetase	E	Bacteria	Actinobacteria	Actinobacteria	Bifidobacteriales	Bifidobacteriaceae
KXVVGHYTDPEVAEK	COG2160 L-arabinose isomerase	G	Bacteria	Actinobacteria	Actinobacteria	Bifidobacteriales	Bifidobacteriaceae
XFEXQAR	COG0057 Glyceraldehyde-3-phosphate dehydrogenase/erythrose-4-phosphate dehydrogenase	G	Bacteria	Actinobacteria	Actinobacteria	Bifidobacteriales	Bifidobacteriaceae
GAAAWDWASTAK	COG3957 Phosphoketolase	G	Bacteria	Actinobacteria	Actinobacteria	Bifidobacteriales	Bifidobacteriaceae
XQFVGDDXXVTNPAR	COG0148 Enolase	G	Bacteria	Actinobacteria	Actinobacteria	Bifidobacteriales	Bifidobacteriaceae
AANYXSXGQXYXR	COG3957 Phosphoketolase	G	Bacteria	Actinobacteria	Actinobacteria	Bifidobacteriales	Bifidobacteriaceae
FTDXXGVQQHFTVPASEFXK	COG0174 Glutamine synthetase	E	Bacteria	Actinobacteria	Actinobacteria	Bifidobacteriales	Bifidobacteriaceae
XPATXEGXPAXTATXAK	COG0176 Transaldolase	G	Bacteria	Actinobacteria	Actinobacteria	Bifidobacteriales	Bifidobacteriaceae
STGXADTASFAPEAEFFXFDKVR	COG0174 Glutamine synthetase	E	Bacteria	Actinobacteria	Actinobacteria	Bifidobacteriales	Bifidobacteriaceae
HXGSVASFFVSR	COG0176 Transaldolase	G	Bacteria	Actinobacteria	Actinobacteria	Bifidobacteriales	Bifidobacteriaceae
XAYEXFEK	COG0176 Transaldolase	G	Bacteria	Actinobacteria	Actinobacteria	Bifidobacteriales	Bifidobacteriaceae
XPATXEGXPAXTATXAK	COG0176 Transaldolase	G	Bacteria	Actinobacteria	Actinobacteria	Bifidobacteriales	Bifidobacteriaceae
TSPVXGTPWK	COG3957 Phosphoketolase	G	Bacteria	Actinobacteria	Actinobacteria	Bifidobacteriales	Bifidobacteriaceae
GAAAWDWASTAK	COG3957 Phosphoketolase	G	Bacteria	Actinobacteria	Actinobacteria	Bifidobacteriales	Bifidobacteriaceae
FREEHDEQXK	COG1882 Pyruvate-formate lyase	C	Bacteria	Actinobacteria	Actinobacteria	Bifidobacteriales	Bifidobacteriaceae
XPATXEGXPAXTATXAK	COG0176 Transaldolase	G	Bacteria	Actinobacteria	Actinobacteria	Bifidobacteriales	Bifidobacteriaceae
XNXQFFSFR	COG1085 Galactose-1-phosphate uridylyltransferase	C	Bacteria	Actinobacteria	Actinobacteria	Bifidobacteriales	Bifidobacteriaceae
EXXHXPGETNEEXXAAXVQK	COG1454 Alcohol dehydrogenase, class IV	C	Bacteria	Actinobacteria	Actinobacteria	Coriobacteriales	Coriobacteriaceae	Collinsella	Collinsella aerofaciens
VXVSPWXXSVXTTDR	COG2222 Predicted phosphosugar isomerases	M	Bacteria	Actinobacteria	Actinobacteria	Coriobacteriales	Coriobacteriaceae	Collinsella	Collinsella aerofaciens
NVAVTEGDKTEAER	COG2160 L-arabinose isomerase	G	Bacteria	Actinobacteria	Actinobacteria
NVAVTEGDKTEAER	COG2160 L-arabinose isomerase	G	Bacteria	Actinobacteria	Actinobacteria
XEXHPXGXGGK	COG2160 L-arabinose isomerase	G	Bacteria	Actinobacteria	Actinobacteria
TGDXDPAVVFHXXR	COG0282 Acetate kinase	C	Bacteria	Actinobacteria	Actinobacteria
NVAVTEGDKTEAER	COG2160 L-arabinose isomerase	G	Bacteria	Actinobacteria	Actinobacteria
NVAVTEGDKTEAER	COG2160 L-arabinose isomerase	G	Bacteria	Actinobacteria	Actinobacteria
NVAVTEGDKTEAER	COG2160 L-arabinose isomerase	G	Bacteria	Actinobacteria	Actinobacteria
NVAVTEGDKTEAER	COG2160 L-arabinose isomerase	G	Bacteria	Actinobacteria	Actinobacteria
XEXHPXGXGGK	COG2160 L-arabinose isomerase	G	Bacteria	Actinobacteria	Actinobacteria
XEXHPXGXGGK	COG2160 L-arabinose isomerase	G	Bacteria	Actinobacteria	Actinobacteria
TGDXDPAVVFHXXR	COG0282 Acetate kinase	C	Bacteria	Actinobacteria	Actinobacteria
NVAVTEGDKTEAER	COG2160 L-arabinose isomerase	G	Bacteria	Actinobacteria	Actinobacteria
NVAVTEGDKTEAER	COG2160 L-arabinose isomerase	G	Bacteria	Actinobacteria	Actinobacteria
XEXHPXGXGGK	COG2160 L-arabinose isomerase	G	Bacteria	Actinobacteria	Actinobacteria
XEXHPXGXGGK	COG2160 L-arabinose isomerase	G	Bacteria	Actinobacteria	Actinobacteria
GYAGXSDXAR	COG0174 Glutamine synthetase	E	Bacteria	Actinobacteria	Actinobacteria
TGDXDPAVVFHXXR	COG0282 Acetate kinase	C	Bacteria	Actinobacteria	Actinobacteria
TGDXDPAVVFHXXR	COG0282 Acetate kinase	C	Bacteria	Actinobacteria	Actinobacteria
GXTXNXAHXEYQTEKR	COG0050 GTPases - translation elongation factors	J	Bacteria	Actinobacteria	Actinobacteria
TGDXDPAVVFHXXR	COG0282 Acetate kinase	C	Bacteria	Actinobacteria	Actinobacteria
DTEAHFEVXK	COG3957 Phosphoketolase	G	Bacteria	Actinobacteria	Actinobacteria
XGANPNANGGVXR	COG3957 Phosphoketolase	G	Bacteria	Actinobacteria	Actinobacteria
DTEAHFEVXK	COG3957 Phosphoketolase	G	Bacteria	Actinobacteria	Actinobacteria
XGANPNANGGVXR	COG3957 Phosphoketolase	G	Bacteria	Actinobacteria	Actinobacteria
DTEAHFEVXK	COG3957 Phosphoketolase	G	Bacteria	Actinobacteria	Actinobacteria
DTEAHFEVXK	COG3957 Phosphoketolase	G	Bacteria	Actinobacteria	Actinobacteria
XSFDAGDXHFDXSK	COG0166 Glucose-6-phosphate isomerase	G	Bacteria	Actinobacteria	Actinobacteria
XTKDEAGXQK	COG3957 Phosphoketolase	G	Bacteria	Actinobacteria	Actinobacteria
DTEAHFEVXK	COG3957 Phosphoketolase	G	Bacteria	Actinobacteria	Actinobacteria
AXXNNXSEXQKR	COG0561 Predicted hydrolases of the HAD superfamily	R	Bacteria	Bacteroidetes	Bacteroidia	Bacteroidales	Bacteroidaceae	Bacteroides	Bacteroides finegoldii
AXXNNXSEXQKR	COG0561 Predicted hydrolases of the HAD superfamily	R	Bacteria	Bacteroidetes	Bacteroidia	Bacteroidales	Bacteroidaceae	Bacteroides	Bacteroides finegoldii
AXXNNXSEXQKR	COG0561 Predicted hydrolases of the HAD superfamily	R	Bacteria	Bacteroidetes	Bacteroidia	Bacteroidales	Bacteroidaceae	Bacteroides	Bacteroides finegoldii
EXFANPDVDGGXXGGAAXK	COG0149 Triosephosphate isomerase	G	Bacteria	Bacteroidetes	Bacteroidia	Bacteroidales	Bacteroidaceae	Bacteroides
VFHFXPAEVNK	NO HITS		Bacteria	Bacteroidetes	Bacteroidia	Bacteroidales	Bacteroidaceae	Bacteroides
HXGPDEDVPAGDXGVGGR	COG0334 Glutamate dehydrogenase/leucine dehydrogenase	E	Bacteria	Bacteroidetes	Bacteroidia	Bacteroidales	Prevotellaceae	Prevotella
MGAEVFHAXAK	COG0148 Enolase	G	Bacteria	Bacteroidetes	Bacteroidia	Bacteroidales	Prevotellaceae	Prevotella
HXGPDEDVPAGDXGVGGR	COG0334 Glutamate dehydrogenase/leucine dehydrogenase	E	Bacteria	Bacteroidetes	Bacteroidia	Bacteroidales	Prevotellaceae	Prevotella
HXGPDEDVPAGDXGVGGR	COG0334 Glutamate dehydrogenase/leucine dehydrogenase	E	Bacteria	Bacteroidetes	Bacteroidia	Bacteroidales	Prevotellaceae	Prevotella
XXWGTANVFGHAR	COG2115 Xylose isomerase	G	Bacteria	Bacteroidetes	Bacteroidia	Bacteroidales
VGEDGPTHEPVEQEAQXR	COG0021 Transketolase	G	Bacteria	Bacteroidetes
GXXDAXXDGSXDKAPTK	COG1866 Phosphoenolpyruvate carboxykinase (ATP)	C	Bacteria	Bacteroidetes
VGEDGPTHEPVEQEAQXR	COG0021 Transketolase	G	Bacteria	Bacteroidetes
GXXDAXXDGSXDKAPTK	COG1866 Phosphoenolpyruvate carboxykinase (ATP)	C	Bacteria	Bacteroidetes
GXXDAXXDGSXDKAPTK	COG1866 Phosphoenolpyruvate carboxykinase (ATP)	C	Bacteria	Bacteroidetes
GXXDAXXDGSXDKAPTK	COG1866 Phosphoenolpyruvate carboxykinase (ATP)	C	Bacteria	Bacteroidetes
GXXDAXXDGSXDKAPTK	COG1866 Phosphoenolpyruvate carboxykinase (ATP)	C	Bacteria	Bacteroidetes
GXXDAXXDGSXDKAPTK	COG1866 Phosphoenolpyruvate carboxykinase (ATP)	C	Bacteria	Bacteroidetes
TNTXXQSAFFR	COG0674 Pyruvate:ferredoxin oxidoreductase and related 2-oxoacid:ferredoxin oxidoreductases, alpha subunit	C	Bacteria	Bacteroidetes
GXAEHAANSXXXK	COG0148 Enolase	G	Bacteria	Firmicutes	Bacilli	Lactobacillales	Streptococcaceae	Streptococcus
XEDQXGEVAEYR	COG0148 Enolase	G	Bacteria	Firmicutes	Bacilli	Lactobacillales	Streptococcaceae	Streptococcus
GXAEHAANSXXXK	COG0148 Enolase	G	Bacteria	Firmicutes	Bacilli	Lactobacillales	Streptococcaceae	Streptococcus
XEDQXGEVAEYR	COG0148 Enolase	G	Bacteria	Firmicutes	Bacilli	Lactobacillales	Streptococcaceae	Streptococcus
AVDNVNNVXAEHXXGFDVR	COG0148 Enolase	G	Bacteria	Firmicutes	Bacilli	Lactobacillales	Streptococcaceae	Streptococcus
GXAEHAANSXXXK	COG0148 Enolase	G	Bacteria	Firmicutes	Bacilli	Lactobacillales	Streptococcaceae	Streptococcus
VQXVGDDFFVTNTAYXEK	COG0148 Enolase	G	Bacteria	Firmicutes	Bacilli	Lactobacillales	Streptococcaceae	Streptococcus
AAADYXEVPXYSYXGGFNTK	COG0148 Enolase	G	Bacteria	Firmicutes	Bacilli	Lactobacillales	Streptococcaceae	Streptococcus
XYGYDXSGPATNAK	COG1882 Pyruvate-formate lyase	C	Bacteria	Firmicutes	Clostridia	Clostridiales	unclassified Clostridiales	unclassified Clostridiales	butyrate-producing bacterium
XPXAXXVQVAGR	COG1614 CO dehydrogenase/acetyl-CoA synthase beta subunit	C	Bacteria	Firmicutes	Clostridia	Clostridiales	Clostridiaceae	Clostridium	Clostridium bartlettii
VTGEFAPGTYTGKPVDFYGSXAR	COG0334 Glutamate dehydrogenase/leucine dehydrogenase	E	Bacteria	Firmicutes	Clostridia	Clostridiales	Clostridiaceae	Clostridium	Clostridium bartlettii
XPXAXXVQVAGR	COG1614 CO dehydrogenase/acetyl-CoA synthase beta subunit	C	Bacteria	Firmicutes	Clostridia	Clostridiales	Clostridiaceae	Clostridium	Clostridium bartlettii
XPXAXXVQVAGR	COG1614 CO dehydrogenase/acetyl-CoA synthase beta subunit	C	Bacteria	Firmicutes	Clostridia	Clostridiales	Clostridiaceae	Clostridium	Clostridium bartlettii
XPXAXXVQVAGR	COG1614 CO dehydrogenase/acetyl-CoA synthase beta subunit	C	Bacteria	Firmicutes	Clostridia	Clostridiales	Clostridiaceae	Clostridium	Clostridium bartlettii
VGAKPNDXSYEK	COG0190 5,10-methylene-tetrahydrofolate dehydrogenase/Methenyl tetrahydrofolate cyclohydrolase	H	Bacteria	Firmicutes	Clostridia	Clostridiales	Clostridiaceae	Clostridium	Clostridium bartlettii
GXGXAVPVR	COG4869 Propanediol utilization protein	Q	Bacteria	Firmicutes	Clostridia	Clostridiales	Clostridiaceae	Clostridium	Clostridium bartlettii
VXGPVRPESQVEVSXADAR	COG4869 Propanediol utilization protein	Q	Bacteria	Firmicutes	Clostridia	Clostridiales	Clostridiaceae	Clostridium	Clostridium bartlettii
XPXAXXVQVAGR	COG1614 CO dehydrogenase/acetyl-CoA synthase beta subunit	C	Bacteria	Firmicutes	Clostridia	Clostridiales	Clostridiaceae	Clostridium	Clostridium bartlettii
TXNVFEXAQXQVK	COG0334 Glutamate dehydrogenase/leucine dehydrogenase	E	Bacteria	Firmicutes	Clostridia	Clostridiales	Clostridiaceae	Clostridium	Clostridium bartlettii
VGAKPNDXSYEK	COG0190 5,10-methylene-tetrahydrofolate dehydrogenase/Methenyl tetrahydrofolate cyclohydrolase	H	Bacteria	Firmicutes	Clostridia	Clostridiales	Clostridiaceae	Clostridium	Clostridium bartlettii
TTTTXGVADGXQK	COG2759 Formyltetrahydrofolate synthetase	F	Bacteria	Firmicutes	Clostridia	Clostridiales	Clostridiaceae	Clostridium	Clostridium bartlettii
QADREGFPEVAEAYQR	COG1592 Rubrerythrin	C	Bacteria	Firmicutes	Clostridia	Clostridiales	Clostridiaceae	Clostridium	Clostridium perfringens
TGXTVNDFDXXEANEAFAAQSXAVAR	COG0183 Acetyl-CoA acetyltransferase	I	Bacteria	Firmicutes	Clostridia	Clostridiales	Clostridiaceae	Clostridium	Clostridium sp.
YXRENGXXXK	COG0249 Mismatch repair ATPase (MutS family)	L	Bacteria	Firmicutes	Clostridia	Clostridiales	Clostridiaceae	Clostridium	Clostridium sporogenes
HVENXTKVYK	COG2759 Formyltetrahydrofolate synthetase	F	Bacteria	Firmicutes	Clostridia	Clostridiales	Clostridiaceae	Clostridium
XPVDNAEDFVK	COG0436 Aspartate/tyrosine/aromatic aminotransferase	E	Bacteria	Firmicutes	Clostridia	Clostridiales	Clostridiaceae	Clostridium
HVENXTKVYK	COG2759 Formyltetrahydrofolate synthetase	F	Bacteria	Firmicutes	Clostridia	Clostridiales	Clostridiaceae	Clostridium
HVENXTKVYK	COG2759 Formyltetrahydrofolate synthetase	F	Bacteria	Firmicutes	Clostridia	Clostridiales	Clostridiaceae	Clostridium
HVENXTKVYK	COG2759 Formyltetrahydrofolate synthetase	F	Bacteria	Firmicutes	Clostridia	Clostridiales	Clostridiaceae	Clostridium
HVENXTKVYK	COG2759 Formyltetrahydrofolate synthetase	F	Bacteria	Firmicutes	Clostridia	Clostridiales	Clostridiaceae	Clostridium
HVENXTKVYK	COG2759 Formyltetrahydrofolate synthetase	F	Bacteria	Firmicutes	Clostridia	Clostridiales	Clostridiaceae	Clostridium
VVVAYEPXWAXGTGK	COG0149 Triosephosphate isomerase	G	Bacteria	Firmicutes	Clostridia	Clostridiales	Clostridiaceae	Clostridium
TEATGYGXXYXTNAXWK	COG0334 Glutamate dehydrogenase/leucine dehydrogenase	E	Bacteria	Firmicutes	Clostridia	Clostridiales	Eubacteriaceae	Eubacterium	Eubacterium eligens
TEATGYGXXYXTNAXWK	COG0334 Glutamate dehydrogenase/leucine dehydrogenase	E	Bacteria	Firmicutes	Clostridia	Clostridiales	Eubacteriaceae	Eubacterium	Eubacterium eligens
TEATGYGXXYXTNAXWK	COG0334 Glutamate dehydrogenase/leucine dehydrogenase	E	Bacteria	Firmicutes	Clostridia	Clostridiales	Eubacteriaceae	Eubacterium	Eubacterium eligens
TEATGYGXXYXTNAXWK	COG0334 Glutamate dehydrogenase/leucine dehydrogenase	E	Bacteria	Firmicutes	Clostridia	Clostridiales	Eubacteriaceae	Eubacterium	Eubacterium eligens
KPXETADEXVDTXXEK	COG2376 Dihydroxyacetone kinase	G	Bacteria	Firmicutes	Clostridia	Clostridiales	Eubacteriaceae	Eubacterium	Eubacterium hallii
TGAGPQXFACDEAVK	COG4816 Ethanolamine utilization protein	E	Bacteria	Firmicutes	Clostridia	Clostridiales	Eubacteriaceae	Eubacterium	Eubacterium hallii
KPXETADEXVDTXXEK	COG2376 Dihydroxyacetone kinase	G	Bacteria	Firmicutes	Clostridia	Clostridiales	Eubacteriaceae	Eubacterium	Eubacterium hallii
VGXAAQAXGXAEGAXEETTK	COG1960 Acyl-CoA dehydrogenases	I	Bacteria	Firmicutes	Clostridia	Clostridiales	Eubacteriaceae	Eubacterium	Eubacterium hallii
KXHVTDYSNAAR	COG0554 Glycerol kinase	C	Bacteria	Firmicutes	Clostridia	Clostridiales	Eubacteriaceae	Eubacterium	Eubacterium hallii
VAXXSGGGSGHEPAHGGFVGK	COG2376 Dihydroxyacetone kinase	G	Bacteria	Firmicutes	Clostridia	Clostridiales	Eubacteriaceae	Eubacterium	Eubacterium hallii
KPXETADEXVDTXXEK	COG2376 Dihydroxyacetone kinase	G	Bacteria	Firmicutes	Clostridia	Clostridiales	Eubacteriaceae	Eubacterium	Eubacterium hallii
VPNVDEAXDFAVEVEHGNR	COG1012 NAD-dependent aldehyde dehydrogenases	C	Bacteria	Firmicutes	Clostridia	Clostridiales	Eubacteriaceae	Eubacterium	Eubacterium hallii
AFGXTVGAPSGXGXVXADTASK	COG4816 Ethanolamine utilization protein	E	Bacteria	Firmicutes	Clostridia	Clostridiales	Eubacteriaceae	Eubacterium	Eubacterium hallii
KXHVTDYSNAAR	COG0554 Glycerol kinase	C	Bacteria	Firmicutes	Clostridia	Clostridiales	Eubacteriaceae	Eubacterium	Eubacterium hallii
XPMXEHXR	COG0219 Predicted rRNA methylase (SpoU class)	J	Bacteria	Firmicutes	Clostridia	Clostridiales	Eubacteriaceae	Eubacterium	Eubacterium hallii
VGXAAQAXGXAEGAXEETTK	COG1960 Acyl-CoA dehydrogenases	I	Bacteria	Firmicutes	Clostridia	Clostridiales	Eubacteriaceae	Eubacterium	Eubacterium hallii
VGXAAQAXGXAEGAXEETTK	COG1960 Acyl-CoA dehydrogenases	I	Bacteria	Firmicutes	Clostridia	Clostridiales	Eubacteriaceae	Eubacterium	Eubacterium hallii
NNXXAQAGQSMXAQANQSNQGVXSXXQ	COG1344 Flagellin and related hook-associated proteins	N	Bacteria	Firmicutes	Clostridia	Clostridiales	Eubacteriaceae	Eubacterium	Eubacterium rectale
SYVDEVXEVVK	COG0334 Glutamate dehydrogenase/leucine dehydrogenase	E	Bacteria	Firmicutes	Clostridia	Clostridiales	Eubacteriaceae	Eubacterium	Eubacterium rectale
ASSNAEDGVSSVQTAEGAXTEVHSMXQR	COG1344 Flagellin and related hook-associated proteins	N	Bacteria	Firmicutes	Clostridia	Clostridiales	Eubacteriaceae	Eubacterium	Eubacterium rectale
SYVDEVXEVVK	COG0334 Glutamate dehydrogenase/leucine dehydrogenase	E	Bacteria	Firmicutes	Clostridia	Clostridiales	Eubacteriaceae	Eubacterium	Eubacterium rectale
XXTXDPVDXEFYDVK	NO HITS		Bacteria	Firmicutes	Clostridia	Clostridiales	Eubacteriaceae	Eubacterium	Eubacterium rectale
NNXXAQAGQSMXAQANQSNQGVXSXXQ	COG1344 Flagellin and related hook-associated proteins	N	Bacteria	Firmicutes	Clostridia	Clostridiales	Eubacteriaceae	Eubacterium	Eubacterium rectale
GXXDAXXSGDXXNAPTK	COG1866 Phosphoenolpyruvate carboxykinase (ATP)	C	Bacteria	Firmicutes	Clostridia	Clostridiales	Eubacteriaceae	Eubacterium	Eubacterium rectale
SYVDEVXEVVK	COG0334 Glutamate dehydrogenase/leucine dehydrogenase	E	Bacteria	Firmicutes	Clostridia	Clostridiales	Eubacteriaceae	Eubacterium	Eubacterium rectale
NNXXAQAGQSMXAQANQSNQGVXSXXQ	COG1344 Flagellin and related hook-associated proteins	N	Bacteria	Firmicutes	Clostridia	Clostridiales	Eubacteriaceae	Eubacterium	Eubacterium rectale
SYVDEVXEVVK	COG0334 Glutamate dehydrogenase/leucine dehydrogenase	E	Bacteria	Firmicutes	Clostridia	Clostridiales	Eubacteriaceae	Eubacterium	Eubacterium rectale
TGXTXDDFDXXEANEAFAAQSXAVAR	COG0183 Acetyl-CoA acetyltransferase	I	Bacteria	Firmicutes	Clostridia	Clostridiales	Eubacteriaceae	Eubacterium	Eubacterium rectale
XNKWTDTXGSSGK	NO HITS		Bacteria	Firmicutes	Clostridia	Clostridiales	Eubacteriaceae	Eubacterium	Eubacterium siraeum
XNKWTDTXGSSGK	NO HITS		Bacteria	Firmicutes	Clostridia	Clostridiales	Eubacteriaceae	Eubacterium	Eubacterium siraeum
TDYVAGANXAGFEK	COG0334 Glutamate dehydrogenase/leucine dehydrogenase	E	Bacteria	Firmicutes	Clostridia	Clostridiales	Eubacteriaceae	Eubacterium
VFVQEGXYDKFVEAAVK	COG1012 NAD-dependent aldehyde dehydrogenases	C	Bacteria	Firmicutes	Clostridia	Clostridiales	Lachnospiraceae	Coprococcus	Coprococcus catus
VFVQEGXYDKFVEAAVK	COG1012 NAD-dependent aldehyde dehydrogenases	C	Bacteria	Firmicutes	Clostridia	Clostridiales	Lachnospiraceae	Coprococcus	Coprococcus catus
VFVQEGXYDKFVEAAVK	COG1012 NAD-dependent aldehyde dehydrogenases	C	Bacteria	Firmicutes	Clostridia	Clostridiales	Lachnospiraceae	Coprococcus	Coprococcus catus
VXNXYAWNEEFK	NO HITS		Bacteria	Firmicutes	Clostridia	Clostridiales	Lachnospiraceae	Coprococcus	Coprococcus eutactus
XGXAAQAXGXAEGAXETTVNYVK	COG1960 Acyl-CoA dehydrogenases	I	Bacteria	Firmicutes	Clostridia	Clostridiales	Lachnospiraceae	Coprococcus	Coprococcus eutactus
XPVATAFWTPKPNXK	COG2160 L-arabinose isomerase	G	Bacteria	Firmicutes	Clostridia	Clostridiales	Lachnospiraceae	Dorea	Dorea formicigenerans
FXDENNYQAVVTHFGDXGGXK	COG2160 L-arabinose isomerase	G	Bacteria	Firmicutes	Clostridia	Clostridiales	Lachnospiraceae	Dorea	Dorea longicatena
TEATGYGXXYXTQEXXK	COG0334 Glutamate dehydrogenase/leucine dehydrogenase	E	Bacteria	Firmicutes	Clostridia	Clostridiales	Lachnospiraceae	Marvinbryantia	Marvinbryantia formatexigens
TEATGYGXXYXTQEXXK	COG0334 Glutamate dehydrogenase/leucine dehydrogenase	E	Bacteria	Firmicutes	Clostridia	Clostridiales	Lachnospiraceae	Marvinbryantia	Marvinbryantia formatexigens
TEATGYGXXYXTQEXXK	COG0334 Glutamate dehydrogenase/leucine dehydrogenase	E	Bacteria	Firmicutes	Clostridia	Clostridiales	Lachnospiraceae	Marvinbryantia	Marvinbryantia formatexigens
FNEXYXXKGDDGEK	COG1344 Flagellin and related hook-associated proteins	N	Bacteria	Firmicutes	Clostridia	Clostridiales	Lachnospiraceae	Roseburia	Roseburia intestinalis
FNEXYXXKGDDGEK	COG1344 Flagellin and related hook-associated proteins	N	Bacteria	Firmicutes	Clostridia	Clostridiales	Lachnospiraceae	Roseburia	Roseburia intestinalis
ASSNAQDGVSSVQTAEGAXTEVHSMXQR	COG1344 Flagellin and related hook-associated proteins	N	Bacteria	Firmicutes	Clostridia	Clostridiales	Lachnospiraceae	Roseburia	Roseburia intestinalis
SAXGAVQNRXEHTXDNXDNXSENTSSAESR	COG1344 Flagellin and related hook-associated proteins	N	Bacteria	Firmicutes	Clostridia	Clostridiales	Lachnospiraceae	Roseburia	Roseburia intestinalis
GYVDEVXEVVK	COG0334 Glutamate dehydrogenase/leucine dehydrogenase	E	Bacteria	Firmicutes	Clostridia	Clostridiales	Lachnospiraceae	Roseburia	Roseburia intestinalis
ASSNAQDGVSSVQTAEGAXTEVHSMXQR	COG1344 Flagellin and related hook-associated proteins	N	Bacteria	Firmicutes	Clostridia	Clostridiales	Lachnospiraceae	Roseburia	Roseburia intestinalis
GXXDAXXSGDXXK	COG1866 Phosphoenolpyruvate carboxykinase (ATP)	C	Bacteria	Firmicutes	Clostridia	Clostridiales	Lachnospiraceae	Roseburia	Roseburia intestinalis
KAXQDEXDQXNTEXDR	COG1344 Flagellin and related hook-associated proteins	N	Bacteria	Firmicutes	Clostridia	Clostridiales	Lachnospiraceae	Roseburia	Roseburia intestinalis
AXQDEXDQXNTEXDR	COG1344 Flagellin and related hook-associated proteins	N	Bacteria	Firmicutes	Clostridia	Clostridiales	Lachnospiraceae	Roseburia	Roseburia intestinalis
SAXGAVQNRXEHTXDNXDNXSENTSSAESR	COG1344 Flagellin and related hook-associated proteins	N	Bacteria	Firmicutes	Clostridia	Clostridiales	Lachnospiraceae	Roseburia	Roseburia intestinalis
GYVDEVXEVVK	COG0334 Glutamate dehydrogenase/leucine dehydrogenase	E	Bacteria	Firmicutes	Clostridia	Clostridiales	Lachnospiraceae	Roseburia	Roseburia intestinalis
ASSNAQDGVSSVQTAEGAXTEVHSMXQR	COG1344 Flagellin and related hook-associated proteins	N	Bacteria	Firmicutes	Clostridia	Clostridiales	Lachnospiraceae	Roseburia	Roseburia intestinalis
FNEXYXXKGDDGEK	COG1344 Flagellin and related hook-associated proteins	N	Bacteria	Firmicutes	Clostridia	Clostridiales	Lachnospiraceae	Roseburia	Roseburia intestinalis
AXQDEXDQXNTEXDR	COG1344 Flagellin and related hook-associated proteins	N	Bacteria	Firmicutes	Clostridia	Clostridiales	Lachnospiraceae	Roseburia	Roseburia intestinalis
GYVDEVXEVVK	COG0334 Glutamate dehydrogenase/leucine dehydrogenase	E	Bacteria	Firmicutes	Clostridia	Clostridiales	Lachnospiraceae	Roseburia	Roseburia intestinalis
GXXDAXXSGDXXK	COG1866 Phosphoenolpyruvate carboxykinase (ATP)	C	Bacteria	Firmicutes	Clostridia	Clostridiales	Lachnospiraceae	Roseburia	Roseburia intestinalis
FNEXYXXKGDDGEK	COG1344 Flagellin and related hook-associated proteins	N	Bacteria	Firmicutes	Clostridia	Clostridiales	Lachnospiraceae	Roseburia	Roseburia intestinalis
FNEXYXXKGDDGEK	COG1344 Flagellin and related hook-associated proteins	N	Bacteria	Firmicutes	Clostridia	Clostridiales	Lachnospiraceae	Roseburia	Roseburia intestinalis
KAXQDEXDQXNTEXDR	COG1344 Flagellin and related hook-associated proteins	N	Bacteria	Firmicutes	Clostridia	Clostridiales	Lachnospiraceae	Roseburia	Roseburia intestinalis
AXQDEXDQXNTEXDR	COG1344 Flagellin and related hook-associated proteins	N	Bacteria	Firmicutes	Clostridia	Clostridiales	Lachnospiraceae	Roseburia	Roseburia intestinalis
GYVDEVXEVVK	COG0334 Glutamate dehydrogenase/leucine dehydrogenase	E	Bacteria	Firmicutes	Clostridia	Clostridiales	Lachnospiraceae	Roseburia	Roseburia intestinalis
GYVDEVXEVVK	COG0334 Glutamate dehydrogenase/leucine dehydrogenase	E	Bacteria	Firmicutes	Clostridia	Clostridiales	Lachnospiraceae	Roseburia	Roseburia intestinalis
GXXDAXXSGDXXK	COG1866 Phosphoenolpyruvate carboxykinase (ATP)	C	Bacteria	Firmicutes	Clostridia	Clostridiales	Lachnospiraceae	Roseburia	Roseburia intestinalis
GYVDEVXEVVK	COG0334 Glutamate dehydrogenase/leucine dehydrogenase	E	Bacteria	Firmicutes	Clostridia	Clostridiales	Lachnospiraceae	Roseburia	Roseburia intestinalis
GXXDAXXSGDXXK	COG1866 Phosphoenolpyruvate carboxykinase (ATP)	C	Bacteria	Firmicutes	Clostridia	Clostridiales	Lachnospiraceae	Roseburia	Roseburia intestinalis
TGXTXDDMDXXEANEAFAAQSXAVAR	COG0183 Acetyl-CoA acetyltransferase	I	Bacteria	Firmicutes	Clostridia	Clostridiales	Lachnospiraceae	Roseburia	Roseburia inulinivorans
VAETTKFNEXYXXK	COG1344 Flagellin and related hook-associated proteins	N	Bacteria	Firmicutes	Clostridia	Clostridiales	Lachnospiraceae
VAETTKFNEXYXXK	COG1344 Flagellin and related hook-associated proteins	N	Bacteria	Firmicutes	Clostridia	Clostridiales	Lachnospiraceae
VAETTKFNEXYXXK	COG1344 Flagellin and related hook-associated proteins	N	Bacteria	Firmicutes	Clostridia	Clostridiales	Lachnospiraceae
EATKEEVNAXYQK	COG1904 Glucuronate isomerase	G	Bacteria	Firmicutes	Clostridia	Clostridiales	Ruminococcaceae	Faecalibacterium	Faecalibacterium prausnitzii
NPDGSYFGDHYK	COG1904 Glucuronate isomerase	G	Bacteria	Firmicutes	Clostridia	Clostridiales	Ruminococcaceae	Faecalibacterium	Faecalibacterium prausnitzii
XASXGXXGNFVGMXTDSR	COG1904 Glucuronate isomerase	G	Bacteria	Firmicutes	Clostridia	Clostridiales	Ruminococcaceae	Faecalibacterium	Faecalibacterium prausnitzii
XASXGXXGNFVGMXTDSR	COG1904 Glucuronate isomerase	G	Bacteria	Firmicutes	Clostridia	Clostridiales	Ruminococcaceae	Faecalibacterium	Faecalibacterium prausnitzii
SXANXGXXGNFVGMXTDSR	COG1904 Glucuronate isomerase	G	Bacteria	Firmicutes	Clostridia	Clostridiales	Ruminococcaceae	Faecalibacterium	Faecalibacterium prausnitzii
XASXGXXGNFVGMXTDSR	COG1904 Glucuronate isomerase	G	Bacteria	Firmicutes	Clostridia	Clostridiales	Ruminococcaceae	Faecalibacterium	Faecalibacterium prausnitzii
EATKEEVNAXYQK	COG1904 Glucuronate isomerase	G	Bacteria	Firmicutes	Clostridia	Clostridiales	Ruminococcaceae	Faecalibacterium	Faecalibacterium prausnitzii
ASDHGXDYXPYR	COG1904 Glucuronate isomerase	G	Bacteria	Firmicutes	Clostridia	Clostridiales	Ruminococcaceae	Faecalibacterium	Faecalibacterium prausnitzii
GTTWQATPGXFAYR	NO HITS		Bacteria	Firmicutes	Clostridia	Clostridiales	Ruminococcaceae	Faecalibacterium	Faecalibacterium prausnitzii
FGGTXANVPAAEXGSXVXK	COG0183 Acetyl-CoA acetyltransferase	I	Bacteria	Firmicutes	Clostridia	Clostridiales	Ruminococcaceae	Faecalibacterium	Faecalibacterium prausnitzii
XASXGXXGNFVGMXTDSR	COG1904 Glucuronate isomerase	G	Bacteria	Firmicutes	Clostridia	Clostridiales	Ruminococcaceae	Faecalibacterium	Faecalibacterium prausnitzii
EATKEEVNAXYQK	COG1904 Glucuronate isomerase	G	Bacteria	Firmicutes	Clostridia	Clostridiales	Ruminococcaceae	Faecalibacterium	Faecalibacterium prausnitzii
FGGTXANVPAAEXGSXVXK	COG0183 Acetyl-CoA acetyltransferase	I	Bacteria	Firmicutes	Clostridia	Clostridiales	Ruminococcaceae	Faecalibacterium	Faecalibacterium prausnitzii
GXEXAEQXAAAXGGGVVGASR	COG2025 Electron transfer flavoprotein, alpha subunit	C	Bacteria	Firmicutes	Clostridia	Clostridiales	Ruminococcaceae	Faecalibacterium	Faecalibacterium prausnitzii
XASXGXXGNFVGMXTDSR	COG1904 Glucuronate isomerase	G	Bacteria	Firmicutes	Clostridia	Clostridiales	Ruminococcaceae	Faecalibacterium	Faecalibacterium prausnitzii
XASXGXXGNFVGMXTDSR	COG1904 Glucuronate isomerase	G	Bacteria	Firmicutes	Clostridia	Clostridiales	Ruminococcaceae	Faecalibacterium	Faecalibacterium prausnitzii
GXATSVGDEGGFAPNXSSDEETXETXXAAXEK	COG0148 Enolase	G	Bacteria	Firmicutes	Clostridia	Clostridiales	Ruminococcaceae	Faecalibacterium	Faecalibacterium prausnitzii
EATKEEVNAXYQK	COG1904 Glucuronate isomerase	G	Bacteria	Firmicutes	Clostridia	Clostridiales	Ruminococcaceae	Faecalibacterium	Faecalibacterium prausnitzii
VXNXWCWNDEFQSR	NO HITS		Bacteria	Firmicutes	Clostridia	Clostridiales	Ruminococcaceae	Faecalibacterium	Faecalibacterium prausnitzii
XASXGXXGNFVGMXTDSR	COG1904 Glucuronate isomerase	G	Bacteria	Firmicutes	Clostridia	Clostridiales	Ruminococcaceae	Faecalibacterium	Faecalibacterium prausnitzii
KGDTVFDTDEGPR	COG0183 Acetyl-CoA acetyltransferase	I	Bacteria	Firmicutes	Clostridia	Clostridiales	Ruminococcaceae	Faecalibacterium	Faecalibacterium prausnitzii
KGDTVFDTDEGPR	COG0183 Acetyl-CoA acetyltransferase	I	Bacteria	Firmicutes	Clostridia	Clostridiales	Ruminococcaceae	Faecalibacterium	Faecalibacterium prausnitzii
TGNTYVTEHVVGXGK	COG1592 Rubrerythrin	C	Bacteria	Firmicutes	Clostridia	Clostridiales	Ruminococcaceae	Faecalibacterium	Faecalibacterium prausnitzii
SPVQVNEAAGFVVNR	COG1250 3-hydroxyacyl-CoA dehydrogenase	I	Bacteria	Firmicutes	Clostridia	Clostridiales	Ruminococcaceae	Faecalibacterium	Faecalibacterium prausnitzii
DGAFKDEXVPVVXK	COG0183 Acetyl-CoA acetyltransferase	I	Bacteria	Firmicutes	Clostridia	Clostridiales	Ruminococcaceae	Faecalibacterium	Faecalibacterium prausnitzii
GXEXAEQXAAAXGGGVVGASR	COG2025 Electron transfer flavoprotein, alpha subunit	C	Bacteria	Firmicutes	Clostridia	Clostridiales	Ruminococcaceae	Faecalibacterium	Faecalibacterium prausnitzii
XGXASQAXGXAEGAXEETVAYVK	COG1960 Acyl-CoA dehydrogenases	I	Bacteria	Firmicutes	Clostridia	Clostridiales	Ruminococcaceae	Faecalibacterium	Faecalibacterium prausnitzii
KGDTVFDTDEGPR	COG0183 Acetyl-CoA acetyltransferase	I	Bacteria	Firmicutes	Clostridia	Clostridiales	Ruminococcaceae	Faecalibacterium	Faecalibacterium prausnitzii
KGDTVFDTDEGPR	COG0183 Acetyl-CoA acetyltransferase	I	Bacteria	Firmicutes	Clostridia	Clostridiales	Ruminococcaceae	Faecalibacterium	Faecalibacterium prausnitzii
TGNTYVTEHVVGXGK	COG1592 Rubrerythrin	C	Bacteria	Firmicutes	Clostridia	Clostridiales	Ruminococcaceae	Faecalibacterium	Faecalibacterium prausnitzii
SPVQVNEAAGFVVNR	COG1250 3-hydroxyacyl-CoA dehydrogenase	I	Bacteria	Firmicutes	Clostridia	Clostridiales	Ruminococcaceae	Faecalibacterium	Faecalibacterium prausnitzii
FSXAPVAVAXSAK	COG0126 3-phosphoglycerate kinase	G	Bacteria	Firmicutes	Clostridia	Clostridiales	Ruminococcaceae	Faecalibacterium	Faecalibacterium prausnitzii
NKHVSXGAGANVK	COG0366 Glycosidases	G	Bacteria	Firmicutes	Clostridia	Clostridiales	Ruminococcaceae	Ruminococcus	Ruminococcus bromii
NKHVSXGAGANVK	COG0366 Glycosidases	G	Bacteria	Firmicutes	Clostridia	Clostridiales	Ruminococcaceae	Ruminococcus	Ruminococcus bromii
XSATSGVAFGR	COG0366 Glycosidases	G	Bacteria	Firmicutes	Clostridia	Clostridiales	Ruminococcaceae	Ruminococcus	Ruminococcus bromii
XHPSVNXGVXK	COG0334 Glutamate dehydrogenase/leucine dehydrogenase	E	Bacteria	Firmicutes	Clostridia	Clostridiales	Ruminococcaceae	Ruminococcus	Ruminococcus bromii
GXXDAXXDGSXTK	COG1866 Phosphoenolpyruvate carboxykinase (ATP)	C	Bacteria	Firmicutes	Clostridia	Clostridiales	Ruminococcaceae	Ruminococcus	Ruminococcus bromii
NANEPEFXQAATEVXTSXEPVFEQNPK	COG0334 Glutamate dehydrogenase/leucine dehydrogenase	E	Bacteria	Firmicutes	Clostridia	Clostridiales	Ruminococcaceae	Ruminococcus	Ruminococcus bromii
NKHVSXGAGANVK	COG0366 Glycosidases	G	Bacteria	Firmicutes	Clostridia	Clostridiales	Ruminococcaceae	Ruminococcus	Ruminococcus bromii
NKHVSXGAGANVK	COG0366 Glycosidases	G	Bacteria	Firmicutes	Clostridia	Clostridiales	Ruminococcaceae	Ruminococcus	Ruminococcus bromii
XSATSGVAFGR	COG0366 Glycosidases	G	Bacteria	Firmicutes	Clostridia	Clostridiales	Ruminococcaceae	Ruminococcus	Ruminococcus bromii
XRNVYEGVXTGK	COG0334 Glutamate dehydrogenase/leucine dehydrogenase	E	Bacteria	Firmicutes	Clostridia	Clostridiales	Ruminococcaceae	Ruminococcus	Ruminococcus bromii
SPEEYWAQKPGVQYQQR	COG0366 Glycosidases	G	Bacteria	Firmicutes	Clostridia	Clostridiales	Ruminococcaceae	Ruminococcus	Ruminococcus bromii
FSVTNAQGGTSTXSDFSSAK	NO HITS		Bacteria	Firmicutes	Clostridia	Clostridiales	Ruminococcaceae	Ruminococcus	Ruminococcus bromii
NKHVSXGAGANVK	COG0366 Glycosidases	G	Bacteria	Firmicutes	Clostridia	Clostridiales	Ruminococcaceae	Ruminococcus	Ruminococcus bromii
NKHVSXGAGANVK	COG0366 Glycosidases	G	Bacteria	Firmicutes	Clostridia	Clostridiales	Ruminococcaceae	Ruminococcus	Ruminococcus bromii
XSATSGVAFGR	COG0366 Glycosidases	G	Bacteria	Firmicutes	Clostridia	Clostridiales	Ruminococcaceae	Ruminococcus	Ruminococcus bromii
XHPSVNXGVXK	COG0334 Glutamate dehydrogenase/leucine dehydrogenase	E	Bacteria	Firmicutes	Clostridia	Clostridiales	Ruminococcaceae	Ruminococcus	Ruminococcus bromii
NKHVSXGAGANVK	COG0366 Glycosidases	G	Bacteria	Firmicutes	Clostridia	Clostridiales	Ruminococcaceae	Ruminococcus	Ruminococcus bromii
NKHVSXGAGANVK	COG0366 Glycosidases	G	Bacteria	Firmicutes	Clostridia	Clostridiales	Ruminococcaceae	Ruminococcus	Ruminococcus bromii
XHPSVNXGVXK	COG0334 Glutamate dehydrogenase/leucine dehydrogenase	E	Bacteria	Firmicutes	Clostridia	Clostridiales	Ruminococcaceae	Ruminococcus	Ruminococcus bromii
NANEPEFXQAATEVXTSXEPVFEQNPK	COG0334 Glutamate dehydrogenase/leucine dehydrogenase	E	Bacteria	Firmicutes	Clostridia	Clostridiales	Ruminococcaceae	Ruminococcus	Ruminococcus bromii
XVRPXSSAPAAK	COG1866 Phosphoenolpyruvate carboxykinase (ATP)	C	Bacteria	Firmicutes	Clostridia	Clostridiales	Ruminococcaceae	Ruminococcus	Ruminococcus obeum
VYYXNFKPEQDEAWQNXAK	COG1653 ABC-type sugar transport system, periplasmic component	G	Bacteria	Firmicutes	Clostridia	Clostridiales	Ruminococcaceae	Ruminococcus	Ruminococcus obeum
XVRPXSSAPAAK	COG1866 Phosphoenolpyruvate carboxykinase (ATP)	C	Bacteria	Firmicutes	Clostridia	Clostridiales	Ruminococcaceae	Ruminococcus	Ruminococcus obeum
XVRPXSSAPAAK	COG1866 Phosphoenolpyruvate carboxykinase (ATP)	C	Bacteria	Firmicutes	Clostridia	Clostridiales	Ruminococcaceae	Ruminococcus	Ruminococcus obeum
VYYXNFKPEQDEAWQNXAK	COG1653 ABC-type sugar transport system, periplasmic component	G	Bacteria	Firmicutes	Clostridia	Clostridiales	Ruminococcaceae	Ruminococcus	Ruminococcus obeum
XVRPXSSAPAAK	COG1866 Phosphoenolpyruvate carboxykinase (ATP)	C	Bacteria	Firmicutes	Clostridia	Clostridiales	Ruminococcaceae	Ruminococcus	Ruminococcus obeum
VVAQNPNEPEFHQAVK	COG0334 Glutamate dehydrogenase/leucine dehydrogenase	E	Bacteria	Firmicutes	Clostridia	Clostridiales	Ruminococcaceae	Ruminococcus	Ruminococcus sp.
XAAVEDXYVAHTK	COG4822 Cobalamin biosynthesis protein CbiK, Co2+ chelatase	H	Bacteria	Firmicutes	Clostridia	Clostridiales	Ruminococcaceae	Ruminococcus	Ruminococcus sp.
XMEVXTPSPYR	COG2265 SAM-dependent methyltransferases related to tRNA (uracil-5-)-methyltransferase	J	Bacteria	Firmicutes	Clostridia	Clostridiales	Ruminococcaceae	Ruminococcus	Ruminococcus sp.
VYNEPNEFFGGQPXFSTXVEYSSHXPEFTK	COG1653 ABC-type sugar transport system, periplasmic component	G	Bacteria	Firmicutes	Clostridia	Clostridiales	Ruminococcaceae	Ruminococcus	Ruminococcus sp.
TDXXDEAGYTXDDXTDXTWSK	COG1653 ABC-type sugar transport system, periplasmic component	G	Bacteria	Firmicutes	Clostridia	Clostridiales	Ruminococcaceae	Ruminococcus	Ruminococcus sp.
GXGPVXQXAEGWTVAXPEEVSDKXWK	COG2407 L-fucose isomerase and related proteins	G	Bacteria	Firmicutes	Clostridia	Clostridiales	Ruminococcaceae	Ruminococcus	Ruminococcus sp.
XMEVXTPSPYR	COG2265 SAM-dependent methyltransferases related to tRNA (uracil-5-)-methyltransferase	J	Bacteria	Firmicutes	Clostridia	Clostridiales	Ruminococcaceae	Ruminococcus	Ruminococcus sp.
YRPNSEYHEGR	COG0334 Glutamate dehydrogenase/leucine dehydrogenase	E	Bacteria	Firmicutes	Clostridia	Clostridiales	Ruminococcaceae	Ruminococcus
SYTEEVYER	COG0334 Glutamate dehydrogenase/leucine dehydrogenase	E	Bacteria	Firmicutes	Clostridia	Clostridiales	Ruminococcaceae	Ruminococcus
SWXXGXKEYR	COG2160 L-arabinose isomerase	G	Bacteria	Firmicutes	Clostridia	Clostridiales	Ruminococcaceae	Ruminococcus
YRPNSEYHEGR	COG0334 Glutamate dehydrogenase/leucine dehydrogenase	E	Bacteria	Firmicutes	Clostridia	Clostridiales	Ruminococcaceae	Ruminococcus
SWXXGXKEYR	COG2160 L-arabinose isomerase	G	Bacteria	Firmicutes	Clostridia	Clostridiales	Ruminococcaceae	Ruminococcus
XXXXDKDETXAQVXR	COG1529 Aerobic-type carbon monoxide dehydrogenase, large subunit CoxL/CutL homologs	C	Bacteria	Firmicutes	Clostridia	Clostridiales	Ruminococcaceae	Ruminococcus
YRPNSEYHEGR	COG0334 Glutamate dehydrogenase/leucine dehydrogenase	E	Bacteria	Firmicutes	Clostridia	Clostridiales	Ruminococcaceae	Ruminococcus
XXXXDKDETXAQVXR	COG1529 Aerobic-type carbon monoxide dehydrogenase, large subunit CoxL/CutL homologs	C	Bacteria	Firmicutes	Clostridia	Clostridiales	Ruminococcaceae	Ruminococcus
FSPTNEAXXGAAVK	COG1529 Aerobic-type carbon monoxide dehydrogenase, large subunit CoxL/CutL homologs	C	Bacteria	Firmicutes	Clostridia	Clostridiales	Ruminococcaceae	Ruminococcus
XADYAXTEAGFGADXGAEK	COG2759 Formyltetrahydrofolate synthetase	F	Bacteria	Firmicutes	Clostridia	Clostridiales	Ruminococcaceae	Ruminococcus
XGXXGNFXGMXTDSR	COG1904 Glucuronate isomerase	G	Bacteria	Firmicutes	Clostridia	Clostridiales	Ruminococcaceae	Subdoligranulum	Subdoligranulum variabile
TAXDKDNQVXGYQFVR	COG0822 NifU homolog involved in Fe-S cluster formation	C	Bacteria	Firmicutes	Clostridia	Clostridiales	Ruminococcaceae	Subdoligranulum	Subdoligranulum variabile
TXHPDNVAAGPASYGXTDSMGR	NO COG		Bacteria	Firmicutes	Clostridia	Clostridiales	Ruminococcaceae	Subdoligranulum	Subdoligranulum variabile
YXEXTEGYXXK	COG0822 NifU homolog involved in Fe-S cluster formation	C	Bacteria	Firmicutes	Clostridia	Clostridiales	Ruminococcaceae	Subdoligranulum	Subdoligranulum variabile
GXXDAXXDGSXXK	COG1866 Phosphoenolpyruvate carboxykinase (ATP)	C	Bacteria	Firmicutes	Clostridia	Clostridiales	Ruminococcaceae
GXXDAXXDGSXXK	COG1866 Phosphoenolpyruvate carboxykinase (ATP)	C	Bacteria	Firmicutes	Clostridia	Clostridiales	Ruminococcaceae
EFGGSDTFATSQXXAAAVNK	COG2086 Electron transfer flavoprotein, beta subunit	C	Bacteria	Firmicutes	Clostridia	Clostridiales	Ruminococcaceae
XAQYEXTXXDWXDGHR	COG2407 L-fucose isomerase and related proteins	G	Bacteria	Firmicutes	Clostridia	Clostridiales	unclassified Clostridiales	unclassified Clostridiales	Clostridiales bacterium
NYRPNSEYHEGR	COG0334 Glutamate dehydrogenase/leucine dehydrogenase	E	Bacteria	Firmicutes	Clostridia	Clostridiales
NYRPNSEYHEGR	COG0334 Glutamate dehydrogenase/leucine dehydrogenase	E	Bacteria	Firmicutes	Clostridia	Clostridiales
XVRPVSAAPAAK	COG1866 Phosphoenolpyruvate carboxykinase (ATP)	C	Bacteria	Firmicutes	Clostridia	Clostridiales
XVRPXSAAPAAK	COG1866 Phosphoenolpyruvate carboxykinase (ATP)	C	Bacteria	Firmicutes	Clostridia	Clostridiales
XTEYAAARPSAEYHEGR	COG0334 Glutamate dehydrogenase/leucine dehydrogenase	E	Bacteria	Firmicutes	Clostridia	Clostridiales
XREEXADQXK	COG1882 Pyruvate-formate lyase	C	Bacteria	Firmicutes	Clostridia	Clostridiales
VVAQNPGEPEFHQAVK	COG0334 Glutamate dehydrogenase/leucine dehydrogenase	E	Bacteria	Firmicutes	Clostridia	Clostridiales
XRGSYEGVXTGK	COG0334 Glutamate dehydrogenase/leucine dehydrogenase	E	Bacteria	Firmicutes	Clostridia	Clostridiales
XRGSYEGVXTGK	COG0334 Glutamate dehydrogenase/leucine dehydrogenase	E	Bacteria	Firmicutes	Clostridia	Clostridiales
HTHXVTGXPDTYGR	COG1882 Pyruvate-formate lyase	C	Bacteria	Firmicutes	Clostridia	Clostridiales
ATGYDXEGVAK	COG2407 L-fucose isomerase and related proteins	G	Bacteria	Firmicutes	Clostridia	Clostridiales
FAADPEVVGPNAK	COG0126 3-phosphoglycerate kinase	G	Bacteria	Firmicutes	Clostridia	Clostridiales
VPWVDDNGKVQVNR	COG0334 Glutamate dehydrogenase/leucine dehydrogenase	E	Bacteria	Firmicutes	Clostridia	Clostridiales
XRGXYEGVXTGK	COG0334 Glutamate dehydrogenase/leucine dehydrogenase	E	Bacteria	Firmicutes	Clostridia	Clostridiales
YXGADTDVPAGDXGTGAR	COG0334 Glutamate dehydrogenase/leucine dehydrogenase	E	Bacteria	Firmicutes	Clostridia	Clostridiales
XXYDFXDQSK	COG1932 Phosphoserine aminotransferase	HE	Bacteria	Firmicutes	Clostridia	Clostridiales
NVXGYPSTAVXPYSQAXSR	COG0166 Glucose-6-phosphate isomerase	G	Bacteria	Firmicutes	Clostridia	Clostridiales
EAXEXXVEAXK	COG0148 Enolase	G	Bacteria	Firmicutes	Clostridia	Clostridiales
GXXDAXXSGAXNEAPTKK	COG1866 Phosphoenolpyruvate carboxykinase (ATP)	C	Bacteria	Firmicutes	Clostridia	Clostridiales
TQATGYGXXYXTNAXWK	COG0334 Glutamate dehydrogenase/leucine dehydrogenase	E	Bacteria	Firmicutes	Clostridia	Clostridiales
NYRPNSEYHEGR	COG0334 Glutamate dehydrogenase/leucine dehydrogenase	E	Bacteria	Firmicutes	Clostridia	Clostridiales
NYRPNSEYHEGR	COG0334 Glutamate dehydrogenase/leucine dehydrogenase	E	Bacteria	Firmicutes	Clostridia	Clostridiales
XVRPVSAAPAAK	COG1866 Phosphoenolpyruvate carboxykinase (ATP)	C	Bacteria	Firmicutes	Clostridia	Clostridiales
XVRPXSAAPAAK	COG1866 Phosphoenolpyruvate carboxykinase (ATP)	C	Bacteria	Firmicutes	Clostridia	Clostridiales
XREEXADQXK	COG1882 Pyruvate-formate lyase	C	Bacteria	Firmicutes	Clostridia	Clostridiales
VVAQNPGEPEFHQAVK	COG0334 Glutamate dehydrogenase/leucine dehydrogenase	E	Bacteria	Firmicutes	Clostridia	Clostridiales
XRGSYEGVXTGK	COG0334 Glutamate dehydrogenase/leucine dehydrogenase	E	Bacteria	Firmicutes	Clostridia	Clostridiales
XRGSYEGVXTGK	COG0334 Glutamate dehydrogenase/leucine dehydrogenase	E	Bacteria	Firmicutes	Clostridia	Clostridiales
HTHXVTGXPDTYGR	COG1882 Pyruvate-formate lyase	C	Bacteria	Firmicutes	Clostridia	Clostridiales
ATGYDXEGVAK	COG2407 L-fucose isomerase and related proteins	G	Bacteria	Firmicutes	Clostridia	Clostridiales
FAADPEVVGPNAK	COG0126 3-phosphoglycerate kinase	G	Bacteria	Firmicutes	Clostridia	Clostridiales
YXGADTDVPAGDXGTGAR	COG0334 Glutamate dehydrogenase/leucine dehydrogenase	E	Bacteria	Firmicutes	Clostridia	Clostridiales
VPWVDDNGKVQVNR	COG0334 Glutamate dehydrogenase/leucine dehydrogenase	E	Bacteria	Firmicutes	Clostridia	Clostridiales
XFQXFEGSNEXQR	COG1960 Acyl-CoA dehydrogenases	I	Bacteria	Firmicutes	Clostridia	Clostridiales
NVXVAXREPSXGPVFGVK	COG2759 Formyltetrahydrofolate synthetase	F	Bacteria	Firmicutes	Clostridia	Clostridiales
GXXDAXXSGAXNEAPTK	COG1866 Phosphoenolpyruvate carboxykinase (ATP)	C	Bacteria	Firmicutes	Clostridia	Clostridiales
ANPDXXDAXXGVYER	COG0166 Glucose-6-phosphate isomerase	G	Bacteria	Firmicutes	Clostridia	Clostridiales
AVADXXAXXSXGXK	COG1151 6Fe-6S prismane cluster-containing protein	C	Bacteria	Firmicutes	Clostridia	Clostridiales
NYRPNSEYHEGR	COG0334 Glutamate dehydrogenase/leucine dehydrogenase	E	Bacteria	Firmicutes	Clostridia	Clostridiales
XVRPVSAAPAAK	COG1866 Phosphoenolpyruvate carboxykinase (ATP)	C	Bacteria	Firmicutes	Clostridia	Clostridiales
XVRPXSAAPAAK	COG1866 Phosphoenolpyruvate carboxykinase (ATP)	C	Bacteria	Firmicutes	Clostridia	Clostridiales
XREEXADQXK	COG1882 Pyruvate-formate lyase	C	Bacteria	Firmicutes	Clostridia	Clostridiales
XREEXADQXK	COG1882 Pyruvate-formate lyase	C	Bacteria	Firmicutes	Clostridia	Clostridiales
VVAQNPGEPEFHQAVK	COG0334 Glutamate dehydrogenase/leucine dehydrogenase	E	Bacteria	Firmicutes	Clostridia	Clostridiales
XRGSYEGVXTGK	COG0334 Glutamate dehydrogenase/leucine dehydrogenase	E	Bacteria	Firmicutes	Clostridia	Clostridiales
XRGSYEGVXTGK	COG0334 Glutamate dehydrogenase/leucine dehydrogenase	E	Bacteria	Firmicutes	Clostridia	Clostridiales
HTHXVTGXPDTYGR	COG1882 Pyruvate-formate lyase	C	Bacteria	Firmicutes	Clostridia	Clostridiales
HTHXVTGXPDTYGR	COG1882 Pyruvate-formate lyase	C	Bacteria	Firmicutes	Clostridia	Clostridiales
FAADPEVVGPNAK	COG0126 3-phosphoglycerate kinase	G	Bacteria	Firmicutes	Clostridia	Clostridiales
XRGXYEGVXTGK	COG0334 Glutamate dehydrogenase/leucine dehydrogenase	E	Bacteria	Firmicutes	Clostridia	Clostridiales
YXGADTDVPAGDXGTGAR	COG0334 Glutamate dehydrogenase/leucine dehydrogenase	E	Bacteria	Firmicutes	Clostridia	Clostridiales
VPWVDDNGKVQVNR	COG0334 Glutamate dehydrogenase/leucine dehydrogenase	E	Bacteria	Firmicutes	Clostridia	Clostridiales
YXGADVDVPAGDXGTGAR	COG0334 Glutamate dehydrogenase/leucine dehydrogenase	E	Bacteria	Firmicutes	Clostridia	Clostridiales
XXYDFXDQSK	COG1932 Phosphoserine aminotransferase	HE	Bacteria	Firmicutes	Clostridia	Clostridiales
FXDPPXHEFVPTEEADXEK	COG0574 Phosphoenolpyruvate synthase/pyruvate phosphate dikinase	G	Bacteria	Firmicutes	Clostridia	Clostridiales
XGFXGGMAVPAVXR	COG1744 Uncharacterized ABC-type transport system, periplasmic component/surface lipoprotein	R	Bacteria	Firmicutes	Clostridia	Clostridiales
SWXXGXQEYR	COG2160 L-arabinose isomerase	G	Bacteria	Firmicutes	Clostridia	Clostridiales
EAXEXXVEAXK	COG0148 Enolase	G	Bacteria	Firmicutes	Clostridia	Clostridiales
GXXDAXXSGAXNEAPTKK	COG1866 Phosphoenolpyruvate carboxykinase (ATP)	C	Bacteria	Firmicutes	Clostridia	Clostridiales
ADDAXWXFPTVYK	COG3459 Cellobiose phosphorylase	G	Bacteria	Firmicutes	Clostridia	Clostridiales
NYRPNSEYHEGR	COG0334 Glutamate dehydrogenase/leucine dehydrogenase	E	Bacteria	Firmicutes	Clostridia	Clostridiales
NYRPNSEYHEGR	COG0334 Glutamate dehydrogenase/leucine dehydrogenase	E	Bacteria	Firmicutes	Clostridia	Clostridiales
XRDTDMAEEMVNYSK	COG1344 Flagellin and related hook-associated proteins	N	Bacteria	Firmicutes	Clostridia	Clostridiales
XVRPVSAAPAAK	COG1866 Phosphoenolpyruvate carboxykinase (ATP)	C	Bacteria	Firmicutes	Clostridia	Clostridiales
XVRPXSAAPAAK	COG1866 Phosphoenolpyruvate carboxykinase (ATP)	C	Bacteria	Firmicutes	Clostridia	Clostridiales
XTEYAAARPSAEYHEGR	COG0334 Glutamate dehydrogenase/leucine dehydrogenase	E	Bacteria	Firmicutes	Clostridia	Clostridiales
XREEXADQXK	COG1882 Pyruvate-formate lyase	C	Bacteria	Firmicutes	Clostridia	Clostridiales
VVAQNPGEPEFHQAVK	COG0334 Glutamate dehydrogenase/leucine dehydrogenase	E	Bacteria	Firmicutes	Clostridia	Clostridiales
XRGSYEGVXTGK	COG0334 Glutamate dehydrogenase/leucine dehydrogenase	E	Bacteria	Firmicutes	Clostridia	Clostridiales
XRGSYEGVXTGK	COG0334 Glutamate dehydrogenase/leucine dehydrogenase	E	Bacteria	Firmicutes	Clostridia	Clostridiales
HTHXVTGXPDTYGR	COG1882 Pyruvate-formate lyase	C	Bacteria	Firmicutes	Clostridia	Clostridiales
ATGYDXEGVAK	COG2407 L-fucose isomerase and related proteins	G	Bacteria	Firmicutes	Clostridia	Clostridiales
FAADPEVVGPNAK	COG0126 3-phosphoglycerate kinase	G	Bacteria	Firmicutes	Clostridia	Clostridiales
VPWVDDNGKVQVNR	COG0334 Glutamate dehydrogenase/leucine dehydrogenase	E	Bacteria	Firmicutes	Clostridia	Clostridiales
XRGXYEGVXTGK	COG0334 Glutamate dehydrogenase/leucine dehydrogenase	E	Bacteria	Firmicutes	Clostridia	Clostridiales
VPWVDDNGKVQVNR	COG0334 Glutamate dehydrogenase/leucine dehydrogenase	E	Bacteria	Firmicutes	Clostridia	Clostridiales
VPVXDGHTAAVFVK	COG0136 Aspartate-semialdehyde dehydrogenase	E	Bacteria	Firmicutes	Clostridia	Clostridiales
XXYDFXDQSK	COG1932 Phosphoserine aminotransferase	HE	Bacteria	Firmicutes	Clostridia	Clostridiales
XGFXGGMAVPAVXR	COG1744 Uncharacterized ABC-type transport system, periplasmic component/surface lipoprotein	R	Bacteria	Firmicutes	Clostridia	Clostridiales
SWXXGXQEYR	COG2160 L-arabinose isomerase	G	Bacteria	Firmicutes	Clostridia	Clostridiales
EAXEXXVEAXK	COG0148 Enolase	G	Bacteria	Firmicutes	Clostridia	Clostridiales
EXDFXGNAVNNPERPFVAXXGGAK	COG0126 3-phosphoglycerate kinase	G	Bacteria	Firmicutes	Clostridia	Clostridiales
GXXDAXXSGAXNEAPTK	COG1866 Phosphoenolpyruvate carboxykinase (ATP)	C	Bacteria	Firmicutes	Clostridia	Clostridiales
TQATGYGXXYXTNAXWK	COG0334 Glutamate dehydrogenase/leucine dehydrogenase	E	Bacteria	Firmicutes	Clostridia	Clostridiales
TEATGYGXXYXTNAXXK	COG0334 Glutamate dehydrogenase/leucine dehydrogenase	E	Bacteria	Firmicutes	Clostridia	Clostridiales
XVRPXSAAPAAK	COG1866 Phosphoenolpyruvate carboxykinase (ATP)	C	Bacteria	Firmicutes	Clostridia	Clostridiales
XREEXADQXK	COG1882 Pyruvate-formate lyase	C	Bacteria	Firmicutes	Clostridia	Clostridiales
XREEXADQXK	COG1882 Pyruvate-formate lyase	C	Bacteria	Firmicutes	Clostridia	Clostridiales
GDPENXDAQYR	COG1879 ABC-type sugar transport system, periplasmic component	G	Bacteria	Firmicutes	Clostridia	Clostridiales
KVVXSAPAGNDXK	COG0057 Glyceraldehyde-3-phosphate dehydrogenase/erythrose-4-phosphate dehydrogenase	G	Bacteria	Firmicutes	Clostridia	Clostridiales
XRGSYEGVXTGK	COG0334 Glutamate dehydrogenase/leucine dehydrogenase	E	Bacteria	Firmicutes	Clostridia	Clostridiales
HTHXVTGXPDTYGR	COG1882 Pyruvate-formate lyase	C	Bacteria	Firmicutes	Clostridia	Clostridiales
XRGSYEGVXTGK	COG0334 Glutamate dehydrogenase/leucine dehydrogenase	E	Bacteria	Firmicutes	Clostridia	Clostridiales
XGVXGAGTMGQGXAK / VGXXGAGTMGQGXAK	COG1250 3-hydroxyacyl-CoA dehydrogenase	I	Bacteria	Firmicutes	Clostridia	Clostridiales
XPAHAXGQAAVNSXR	COG0524 Sugar kinases, ribokinase family	G	Bacteria	Firmicutes	Clostridia	Clostridiales
GFYVYNADR	COG1250 3-hydroxyacyl-CoA dehydrogenase	I	Bacteria	Firmicutes	Clostridia	Clostridiales
YXGADTDVPAGDXGTGAR	COG0334 Glutamate dehydrogenase/leucine dehydrogenase	E	Bacteria	Firmicutes	Clostridia	Clostridiales
YXGADVDVPAGDXGTGAR	COG0334 Glutamate dehydrogenase/leucine dehydrogenase	E	Bacteria	Firmicutes	Clostridia	Clostridiales
TPVQVNEAAGFVVNR	COG1250 3-hydroxyacyl-CoA dehydrogenase	I	Bacteria	Firmicutes	Clostridia	Clostridiales
TPVQVNEAAGFVVNR	COG1250 3-hydroxyacyl-CoA dehydrogenase	I	Bacteria	Firmicutes	Clostridia	Clostridiales
GVSEDXXADXR	COG1592 Rubrerythrin	C	Bacteria	Firmicutes	Clostridia	Clostridiales
TQSAFSDDGXAVGAGXEDXGK	COG0822 NifU homolog involved in Fe-S cluster formation	C	Bacteria	Firmicutes	Clostridia	Clostridiales
GXPEXXSPEXXK	COG4154 Fucose dissimilation pathway protein FucU	G	Bacteria	Firmicutes	Clostridia	Clostridiales
GXXDAXXSGAXNEAPTKK	COG1866 Phosphoenolpyruvate carboxykinase (ATP)	C	Bacteria	Firmicutes	Clostridia	Clostridiales
GXXDAXXSGAXNEAPTK	COG1866 Phosphoenolpyruvate carboxykinase (ATP)	C	Bacteria	Firmicutes	Clostridia	Clostridiales
TQATGYGXXYXTNAXWK	COG0334 Glutamate dehydrogenase/leucine dehydrogenase	E	Bacteria	Firmicutes	Clostridia	Clostridiales
TQATGYGXXYXTNAXWK	COG0334 Glutamate dehydrogenase/leucine dehydrogenase	E	Bacteria	Firmicutes	Clostridia	Clostridiales
EXDFXGNAVENPVRPFVAXXGGAK	COG0126 3-phosphoglycerate kinase	G	Bacteria	Firmicutes	Clostridia	Clostridiales
HTHXVTGXPDTYGR	COG1882 Pyruvate-formate lyase	C	Bacteria	Firmicutes	Clostridia	Clostridiales
SQSAFSEDGXAVGAGXEDXGK	COG0822 NifU homolog involved in Fe-S cluster formation	C	Bacteria	Firmicutes	Clostridia	Clostridiales
XVRPVSAAPAAK	COG1866 Phosphoenolpyruvate carboxykinase (ATP)	C	Bacteria	Firmicutes	Clostridia	Clostridiales
FQHXVAGTYKK	NO COG		Bacteria	Firmicutes	Clostridia	Clostridiales
XVRPXSAAPAAK	COG1866 Phosphoenolpyruvate carboxykinase (ATP)	C	Bacteria	Firmicutes	Clostridia	Clostridiales
XREEXADQXK	COG1882 Pyruvate-formate lyase	C	Bacteria	Firmicutes	Clostridia	Clostridiales
GDPENXDAQYR	COG1879 ABC-type sugar transport system, periplasmic component	G	Bacteria	Firmicutes	Clostridia	Clostridiales
KVVXSAPAGNDXK	COG0057 Glyceraldehyde-3-phosphate dehydrogenase/erythrose-4-phosphate dehydrogenase	G	Bacteria	Firmicutes	Clostridia	Clostridiales
XRGSYEGVXTGK	COG0334 Glutamate dehydrogenase/leucine dehydrogenase	E	Bacteria	Firmicutes	Clostridia	Clostridiales
XRGSYEGVXTGK	COG0334 Glutamate dehydrogenase/leucine dehydrogenase	E	Bacteria	Firmicutes	Clostridia	Clostridiales
HTHXVTGXPDTYGR	COG1882 Pyruvate-formate lyase	C	Bacteria	Firmicutes	Clostridia	Clostridiales
XGVXGAGTMGQGXAK / VGXXGAGTMGQGXAK	COG1250 3-hydroxyacyl-CoA dehydrogenase	I	Bacteria	Firmicutes	Clostridia	Clostridiales
XPAHAXGQAAVNSXR	COG0524 Sugar kinases, ribokinase family	G	Bacteria	Firmicutes	Clostridia	Clostridiales
GFYVYNADR	COG1250 3-hydroxyacyl-CoA dehydrogenase	I	Bacteria	Firmicutes	Clostridia	Clostridiales
YXGADTDVPAGDXGTGAR	COG0334 Glutamate dehydrogenase/leucine dehydrogenase	E	Bacteria	Firmicutes	Clostridia	Clostridiales
YXGADVDVPAGDXGTGAR	COG0334 Glutamate dehydrogenase/leucine dehydrogenase	E	Bacteria	Firmicutes	Clostridia	Clostridiales
TPVQVNEAAGFVVNR	COG1250 3-hydroxyacyl-CoA dehydrogenase	I	Bacteria	Firmicutes	Clostridia	Clostridiales
TPVQVNEAAGFVVNR	COG1250 3-hydroxyacyl-CoA dehydrogenase	I	Bacteria	Firmicutes	Clostridia	Clostridiales
XGXAAQAXGXAEGAXER	COG1960 Acyl-CoA dehydrogenases	I	Bacteria	Firmicutes	Clostridia	Clostridiales
GXXDAXXSGAXNEAPTK	COG1866 Phosphoenolpyruvate carboxykinase (ATP)	C	Bacteria	Firmicutes	Clostridia	Clostridiales
TQATGYGXXYXTNAXWK	COG0334 Glutamate dehydrogenase/leucine dehydrogenase	E	Bacteria	Firmicutes	Clostridia	Clostridiales
VPWVDDEGNVQVNR	COG0334 Glutamate dehydrogenase/leucine dehydrogenase	E	Bacteria	Firmicutes	Clostridia	Halanaerobiales	Halobacteroidaceae	Acetohalobium	Acetohalobium arabaticum
VPWVDDEGNVQVNR	COG0334 Glutamate dehydrogenase/leucine dehydrogenase	E	Bacteria	Firmicutes	Clostridia	Halanaerobiales	Halobacteroidaceae	Acetohalobium	Acetohalobium arabaticum
VPWVDDEGNVQVNR	COG0334 Glutamate dehydrogenase/leucine dehydrogenase	E	Bacteria	Firmicutes	Clostridia	Halanaerobiales	Halobacteroidaceae	Acetohalobium	Acetohalobium arabaticum
XXXTTAXNPTPAGEGK	COG2759 Formyltetrahydrofolate synthetase	F	Bacteria	Firmicutes	Clostridia
XGXCGAVSWXDAK	COG1614 CO dehydrogenase/acetyl-CoA synthase beta subunit	C	Bacteria	Firmicutes	Clostridia
XXXTTAXNPTPAGEGK	COG2759 Formyltetrahydrofolate synthetase	F	Bacteria	Firmicutes	Clostridia
XGXCGAVSWXDAK	COG1614 CO dehydrogenase/acetyl-CoA synthase beta subunit	C	Bacteria	Firmicutes	Clostridia
XGXCGAVSWXDAK	COG1614 CO dehydrogenase/acetyl-CoA synthase beta subunit	C	Bacteria	Firmicutes	Clostridia
XGXCGAVSWXDAK	COG1614 CO dehydrogenase/acetyl-CoA synthase beta subunit	C	Bacteria	Firmicutes	Clostridia
XGXCGAVSWXDAK	COG1614 CO dehydrogenase/acetyl-CoA synthase beta subunit	C	Bacteria	Firmicutes	Clostridia
TFATGXAGXSHVADSXSAXK	COG1882 Pyruvate-formate lyase	C	Bacteria	Firmicutes	Erysipelotrichi	Erysipelotrichales	Erysipelotrichaceae	Erysipelothrix	Erysipelothrix rhusiopathiae
TFATGXAGXSHVADSXSAXK	COG1882 Pyruvate-formate lyase	C	Bacteria	Firmicutes	Erysipelotrichi	Erysipelotrichales	Erysipelotrichaceae	Erysipelothrix	Erysipelothrix rhusiopathiae
NAXADACTGSNPR	COG1454 Alcohol dehydrogenase, class IV	C	Bacteria	Firmicutes
AADDAAGXTXSEK	COG1344 Flagellin and related hook-associated proteins	N	Bacteria	Firmicutes
NVAVTEGDKVEAQXK	COG2160 L-arabinose isomerase	G	Bacteria	Firmicutes
VPWVDDEGKVQVNR	COG0334 Glutamate dehydrogenase/leucine dehydrogenase	E	Bacteria	Firmicutes
NAXADACTGSNPR	COG1454 Alcohol dehydrogenase, class IV	C	Bacteria	Firmicutes
AADDAAGXTXSEK	COG1344 Flagellin and related hook-associated proteins	N	Bacteria	Firmicutes
NVAVTEGDKVEAQXK	COG2160 L-arabinose isomerase	G	Bacteria	Firmicutes
NAXADACTGSNPR	COG1454 Alcohol dehydrogenase, class IV	C	Bacteria	Firmicutes
AADDAAGXTXSEK	COG1344 Flagellin and related hook-associated proteins	N	Bacteria	Firmicutes
TFATGXAGFSHVXDSXSAXK	COG1882 Pyruvate-formate lyase	C	Bacteria	Firmicutes
NAXADACTGSNPR	COG1454 Alcohol dehydrogenase, class IV	C	Bacteria	Firmicutes
AADDAAGXTXSEK	COG1344 Flagellin and related hook-associated proteins	N	Bacteria	Firmicutes
FDDEXVPVPVK	COG0183 Acetyl-CoA acetyltransferase	I	Bacteria	Firmicutes
MGGAXSNTPAADXGAXVXK	COG0183 Acetyl-CoA acetyltransferase	I	Bacteria	Firmicutes
GXFGEFXTNAQGEDVVAGVR	COG0574 Phosphoenolpyruvate synthase/pyruvate phosphate dikinase	G	Bacteria	Firmicutes
AADDAAGXTXSEK	COG1344 Flagellin and related hook-associated proteins	N	Bacteria	Firmicutes
VPVPTGSTTXXVAVVK	COG0057 Glyceraldehyde-3-phosphate dehydrogenase/erythrose-4-phosphate dehydrogenase	G	Bacteria	Firmicutes
XENPFXPFNR	COG2152 Predicted glycosylase	G	Bacteria	Firmicutes
AADDAAGXTXSEK	COG1344 Flagellin and related hook-associated proteins	N	Bacteria	Firmicutes
VPVPTGSTTXXVAVVK	COG0057 Glyceraldehyde-3-phosphate dehydrogenase/erythrose-4-phosphate dehydrogenase	G	Bacteria	Firmicutes
VPVPTGSTTXXVAVVK	COG0057 Glyceraldehyde-3-phosphate dehydrogenase/erythrose-4-phosphate dehydrogenase	G	Bacteria	Firmicutes
XFQFXYXPK	COG0627 Predicted esterase	R	Bacteria	Fusobacteria	Fusobacteria	Fusobacteriales	Fusobacteriaceae	Fusobacterium	Fusobacterium varium
NXVRMVNXXSR	COG0803 ABC-type metal ion transport system, periplasmic component/surface adhesin	P	Bacteria	Fusobacteria	Fusobacteria	Fusobacteriales	Fusobacteriaceae	Fusobacterium
NXVRMVNXXSR	COG0803 ABC-type metal ion transport system, periplasmic component/surface adhesin	P	Bacteria	Fusobacteria	Fusobacteria	Fusobacteriales	Fusobacteriaceae	Fusobacterium
XXFNGGEAPRXGXXASGK	COG4231 Indolepyruvate ferredoxin oxidoreductase, alpha and beta subunits	C	Bacteria	Proteobacteria	Alphaproteobacteria	Rhizobiales	Beijerinckiaceae	Beijerinckia	Beijerinckia indica
CVVDRVNXTVR	COG1137 ABC-type (unclassified) transport system, ATPase component	R	Bacteria	Proteobacteria	Deltaproteobacteria	Syntrophobacterales	Syntrophobacteraceae	Syntrophobacter	Syntrophobacter fumaroxidans
CVVDRVNXTVR	COG1137 ABC-type (unclassified) transport system, ATPase component	R	Bacteria	Proteobacteria	Deltaproteobacteria	Syntrophobacterales	Syntrophobacteraceae	Syntrophobacter	Syntrophobacter fumaroxidans
XVNRFEGVXTGK	COG0334 Glutamate dehydrogenase/leucine dehydrogenase	E	Bacteria	Proteobacteria	Epsilonproteobacteria	Campylobacterales	Helicobacteraceae	Helicobacter
XVNRFEGVXTGK	COG0334 Glutamate dehydrogenase/leucine dehydrogenase	E	Bacteria	Proteobacteria	Epsilonproteobacteria	Campylobacterales	Helicobacteraceae	Helicobacter
XVNRFEGVXTGK	COG0334 Glutamate dehydrogenase/leucine dehydrogenase	E	Bacteria	Proteobacteria	Epsilonproteobacteria	Campylobacterales	Helicobacteraceae	Helicobacter
XVNRFEGVXTGK	COG0334 Glutamate dehydrogenase/leucine dehydrogenase	E	Bacteria	Proteobacteria	Epsilonproteobacteria	Campylobacterales	Helicobacteraceae	Helicobacter
AXGXVXPEXDGKXXGSAQR	COG0057 Glyceraldehyde-3-phosphate dehydrogenase/erythrose-4-phosphate dehydrogenase	G	Bacteria	Proteobacteria	Deltaproteobacteria
NXEXEXFGAXSXSR	COG1760 L-serine deaminase	E	Bacteria	Proteobacteria	Gammaproteobacteria	Enterobacteriales	Enterobacteriaceae	Citrobacter	Citrobacter koseri
NXEXEXFGAXSXSR	COG1760 L-serine deaminase	E	Bacteria	Proteobacteria	Gammaproteobacteria	Enterobacteriales	Enterobacteriaceae	Citrobacter	Citrobacter koseri
QEYSQAASVXVGNXK	NO COG		Bacteria	Proteobacteria	Gammaproteobacteria	Enterobacteriales	Enterobacteriaceae	Escherichia	Escherichia coli
XNXDQNPGTAPK	COG0526 Thiol-disulfide isomerase and thioredoxins	OC	Bacteria	Proteobacteria	Gammaproteobacteria	Enterobacteriales	Enterobacteriaceae
SMVVQHNMQAANANR	COG1344 Flagellin and related hook-associated proteins	N	Unknown
SMVVQHNMQAANANR	COG1344 Flagellin and related hook-associated proteins	N	Unknown
SMVVQHNMQAANANR	COG1344 Flagellin and related hook-associated proteins	N	Unknown
XECDDKGDGSCDVR	COG5069 Ca2+-binding actin-bundling protein fimbrin/plastin (EF-Hand superfamily)	Z	Human
SMVVQHNMQAANANR	COG1344 Flagellin and related hook-associated proteins	N	Unknown
RGGDGGEFGATTGRPR	COG0104 Adenylosuccinate synthase	F	Bacteria
SMVVQHNMQAANANR	COG1344 Flagellin and related hook-associated proteins	N	Unknown
SANASGSVEAATK	COG2182 Maltose-binding periplasmic proteins/domains	G	Unknown
XRDTDMAQEMVNYSK	COG1344 Flagellin and related hook-associated proteins	N	Unknown
GGSGGSYGGGGSGGGYGGGSGSR	NO HITS		Human
XAHVVXKEEQK	NO HITS		Human
GGSGGSYGGGGSGGGYGGGSGSR	NO HITS		Human
RAGYTAVXSHR	COG0148 Enolase	G	Bacteria
CETQNPVSAR	NO HITS		Human
FSSSSGYGGGSSR	NO HITS		Human
SAXGAVQNR	COG1344 Flagellin and related hook-associated proteins	N	Bacteria
SGGGGGGGXGSGGSXR	NO HITS		Human
XXDGSQGGSSSTTGSGPK	COG1344 Flagellin and related hook-associated proteins	N	Unknown
SQYEQXAEQNRK	NO HITS		Human
KXTHQYQGVXTGK	COG0334 Glutamate dehydrogenase/leucine dehydrogenase	E	Unknown
YTQEXATSADGK	NO HITS		Unknown
AFVNCDENSR	NO HITS		Human
AQYEDXAQK	NO HITS		Human
YAVNDAQPEESR	COG1653 ABC-type sugar transport system, periplasmic component	G	Unknown
AWDADQTEANNR	NO COG		Human
NXVRPXSSAPAAK	COG1866 Phosphoenolpyruvate carboxykinase (ATP)	C	Bacteria
VGTYHTDCNCFR	NO HITS		Human
AADGAGSQGXDXQEKR	COG4724 Endo-beta-N-acetylglucosaminidase D	G	Unknown
MXGXTSGAQAK	COG1344 Flagellin and related hook-associated proteins	N	Unknown
AGAANXVPNSTGAAK	COG0057 Glyceraldehyde-3-phosphate dehydrogenase/erythrose-4-phosphate dehydrogenase	G	Bacteria
XTHQYQGVXTGK	COG0334 Glutamate dehydrogenase/leucine dehydrogenase	E	Unknown
NEYXXKNFK	COG3522 Uncharacterized protein conserved in bacteria	S	Bacteria
AVEEKYPEXTH	NO HITS		Unknown
VQTFQGDDDHNWK	NO HITS		Human
VQTFQGDDDHNWK	NO HITS		Human
XFGPDETASNR	COG3957 Phosphoketolase	G	Bacteria
NYAXGTVSQTK	NO HITS		Unknown
TNAENEFVTXKK	NO HITS		Human
HFVAVSTNXEK	COG0166 Glucose-6-phosphate isomerase	G	Bacteria
NSKXEXSEXNR	NO HITS		Human
XKDTGXTAAEXK	COG4992 Ornithine/acetylornithine aminotransferase	E	Unknown
XKDTGXTAAEXK	COG4992 Ornithine/acetylornithine aminotransferase	E	Unknown
TAVGXVESSHXR	COG2160 L-arabinose isomerase	G	Unknown
XKYENEVAXR	NO HITS		Human
XKYENEVAXR	NO HITS		Human
AXVFVDNHDNQR	COG0366 Glycosidases	G	Human
VNDTAEATXEYK	NO HITS		Unknown
TPXTATXSK	NO HITS		Human
XSDAGQYXCQAGDDSNSNKK	NO HITS		Human
MXGXTSGAQAK	COG1344 Flagellin and related hook-associated proteins	N	Unknown
AADDAAGXSXSEK	COG1344 Flagellin and related hook-associated proteins	N	Bacteria
AGDDAAGXAXSEK	COG1344 Flagellin and related hook-associated proteins	N	Bacteria
GXSYGGSXAR	COG0334 Glutamate dehydrogenase/leucine dehydrogenase	E	Bacteria
GXTYGGSXAR	COG0334 Glutamate dehydrogenase/leucine dehydrogenase	E	Bacteria
HXGADTDVPAGDXGTGAR	COG0334 Glutamate dehydrogenase/leucine dehydrogenase	E	Bacteria
TXNAGDTVSXGGK	COG1344 Flagellin and related hook-associated proteins	N	Unknown
NYTXGGEEADVK	COG1344 Flagellin and related hook-associated proteins	N	Unknown
TGSGDXENYNDATQVR	COG0366 Glycosidases	G	Human
TGTGNPGANVTENVTXAEDGKK	NO HITS		Unknown
FHPSVNQGXXK	COG0334 Glutamate dehydrogenase/leucine dehydrogenase	E	Bacteria
AXEESNYEXEGK	NO HITS		Human
XTDHYPGYEEVDGTTGK	NO HITS		Unknown
XTEXTATVAGNTK	NO HITS		Unknown
VSAXVDYER	NO COG		Human
XXMDEXTQVKK	COG0188 Type IIA topoisomerase (DNA gyrase/topo II, topoisomerase IV), A subunit	L	Unknown
HXGADTDVPAGDXGVGGR	COG0334 Glutamate dehydrogenase/leucine dehydrogenase	E	Unknown
XEXSEXNR	NO HITS		Human
DNTVAGATVADAVK	NO HITS		Unknown
XRNVYEGVXTGK / XVNRYEGVXTGK	COG0334 Glutamate dehydrogenase/leucine dehydrogenase	E	Bacteria
FXEQQNQVXQTK	NO HITS		Human
YEEXQXTAGR	NO HITS		Human
VPWVDDKGQVQVNR	COG0334 Glutamate dehydrogenase/leucine dehydrogenase	E	Bacteria
VQFNNSXGPYK	COG0334 Glutamate dehydrogenase/leucine dehydrogenase	E	Bacteria
XGTHXXSXDPR	COG0243 Anaerobic dehydrogenases, typically selenocysteine-containing	C	Unknown
SDXVNEEATGQFR	NO HITS		Human
FHPSVNXSVVK	COG0334 Glutamate dehydrogenase/leucine dehydrogenase	E	Unknown
FKDEXVPVEVK	COG0183 Acetyl-CoA acetyltransferase	I	Bacteria
KVTFNSENVAAGNYVYK	NO HITS		Unknown
WXQGSQEXPR	NO HITS		Human
XRNEFTGVXTGK	COG0334 Glutamate dehydrogenase/leucine dehydrogenase	E	Unknown
NYFDGNATXDEAK	NO HITS		Unknown
XHPSVNXGXXK	COG0334 Glutamate dehydrogenase/leucine dehydrogenase	E	Bacteria
AWGPGXETGQVGK	COG5069 Ca2+-binding actin-bundling protein fimbrin/plastin (EF-Hand superfamily)	Z	Human
VQFNSAXGPYK	COG0334 Glutamate dehydrogenase/leucine dehydrogenase	E	Unknown
NSXTGXPXGGGK	COG0334 Glutamate dehydrogenase/leucine dehydrogenase	E	Unknown
XYVVDVGSEPR	NO COG		Human
NSXTTXPXGGGK	COG0334 Glutamate dehydrogenase/leucine dehydrogenase	E	Unknown
XHPSVNXGXXK	COG0334 Glutamate dehydrogenase/leucine dehydrogenase	E	Bacteria
FKDXDTXVATAK	NO HITS		Unknown
GAXADNXXR	COG2355 Zn-dependent dipeptidase, microsomal dipeptidase homolog	E	Human
HXGPNVDVPAGDXGVGGR	COG0334 Glutamate dehydrogenase/leucine dehydrogenase	E	Bacteria
GSVTFHCAXGPEVANVAK	NO HITS		Human
GSVTFHCAXGPEVANVAK	NO HITS		Human
DVGXTDDDXKDQYQYTK	NO HITS		Unknown
YQFNSAXGPYK	COG0334 Glutamate dehydrogenase/leucine dehydrogenase	E	Unknown
DXXYGNXGXXK	NO HITS		Unknown
XDVDNNNFDXK	NO HITS		Unknown
YENXESADDAYQFK	NO HITS		Unknown
GYGFGAEGDWK	COG2160 L-arabinose isomerase	G	Bacteria
XSXTGTYDXK	COG4826 Serine protease inhibitor	O	Human
FHPSVNXGXXK	COG0334 Glutamate dehydrogenase/leucine dehydrogenase	E	Unknown
FHPSVNXSXXK	COG0334 Glutamate dehydrogenase/leucine dehydrogenase	E	Unknown
FGVAAADXGXVGKK	COG4724 Endo-beta-N-acetylglucosaminidase D	G	Unknown
XPAAFXDXAHK	COG4724 Endo-beta-N-acetylglucosaminidase D	G	Unknown
FHPSVNXSXXK	COG0334 Glutamate dehydrogenase/leucine dehydrogenase	E	Unknown
GVXXNAFER	NO HITS		Human
VGDYFAAEXAK	COG4992 Ornithine/acetylornithine aminotransferase	E	Unknown
GXVMEXXYRTK	NO HITS		Unknown
AVGFGGDFDGVPR	COG2355 Zn-dependent dipeptidase, microsomal dipeptidase homolog	E	Human
SVXGQXGXTK	COG4826 Serine protease inhibitor	O	Human
TXTXXSVTR	NO HITS		Human
RXGAENYVFWGGR	COG2115 Xylose isomerase	G	Bacteria
XSDFEDVXGQR	NO HITS		Human
VSXWVTVR	NO COG		Human
VFSNGADXSGVTEEAPXK	COG4826 Serine protease inhibitor	O	Human
XAVKDPTQYAAFXK	NO HITS		Unknown
EXGFXFGQYKR	COG0334 Glutamate dehydrogenase/leucine dehydrogenase	E	Unknown
HGVQEXEXEXQSQXSKK	NO HITS		Human
XPEFNSXXGQR	NO HITS		Human
XXDGSXGGSSAVTEFGAK	COG1344 Flagellin and related hook-associated proteins	N	Unknown
FXAFEQTFK	COG0334 Glutamate dehydrogenase/leucine dehydrogenase	E	Unknown
FESXDAYENYQFK	NO HITS		Unknown
XSWTFEEVDAK	COG0334 Glutamate dehydrogenase/leucine dehydrogenase	E	Bacteria
XSXQWXR	COG1506 Dipeptidyl aminopeptidases/acylaminoacyl-peptidases	E	Human
VAYDXVYYVR	NO HITS		Human
SDKAAADQPXVXAAVEGXK	NO HITS		Unknown
FXGFEQTFK	COG0334 Glutamate dehydrogenase/leucine dehydrogenase	E	Unknown
AXADGAFKDEXVPVVXK	COG0183 Acetyl-CoA acetyltransferase	I	Unknown
XGAENYVFWGGR	COG2115 Xylose isomerase	G	Bacteria
GHGAGGASXXTFWDAR	COG0366 Glycosidases	G	Human
QEPSQGTTTFAVTSXXR	NO HITS		Human
FAGFPAXXNR	COG1501 Alpha-glucosidases, family 31 of glycosyl hydrolases	G	Human
TSXVHXFEWR	COG0366 Glycosidases	G	Human
FCQAFMTEXYR	COG0334 Glutamate dehydrogenase/leucine dehydrogenase	E	Bacteria
TSXVHXFEWR	COG0366 Glycosidases	G	Human
XDFSAXDXER	NO HITS		Human
XVSXTXNXVTR	NO HITS		Human
XGEAAVXEXVER	NO COG		Human
DGSFSVVXTGXR	NO HITS		Human
YVDTDYTMPVKDXGXTDADXANQYQYTK	NO HITS		Unknown
FYNSEGYGFGVTXYPNSR	NO HITS		Human
NWGEGWGFVPSDR	COG0366 Glycosidases	G	Human
XFGTTANEYXHXFK	COG4724 Endo-beta-N-acetylglucosaminidase D	G	Unknown
TXAXVAXNFK	COG4724 Endo-beta-N-acetylglucosaminidase D	G	Unknown
NVAXXXPETWK	NO HITS		Human
XXXNPQDKDGSFSVVXTGXR	NO HITS		Human
VYYXNFKPEQDEAWQAXAK	COG1653 ABC-type sugar transport system, periplasmic component	G	Unknown
VPXAXFAXNR	COG0006 Xaa-Pro aminopeptidase	E	Human
XTGXXDXAXEKDYVR	COG0366 Glycosidases	G	Human
XFNVNWFR	COG1274 Phosphoenolpyruvate carboxykinase (GTP)	C	Unknown
FXEQQNQVXQTKWEXXQQVDTSTR	NO HITS		Human
VSSTDDVVEEXVFQK	NO HITS		Unknown
XTGXXDXAXEK	COG0366 Glycosidases	G	Human
XSDSFFXPXK	NO COG		Human
NVXVAXREPSXGPVFGXK	COG2759 Formyltetrahydrofolate synthetase	F	Unknown
FXGFEQVFK	COG0334 Glutamate dehydrogenase/leucine dehydrogenase	E	Unknown
XVPGFEAPVNXVYSAR	COG0174 Glutamine synthetase	E	Bacteria
SPGPGDXSXYDNWXR	NO COG		Human
FXGFEQXXK	COG0334 Glutamate dehydrogenase/leucine dehydrogenase	E	Unknown
VXAPAXVGFSAXEQR	COG0148 Enolase	G	Unknown
GXVXGAGWAEGYXR	NO COG		Human
XVGXXDXAXEKDYVR	COG0366 Glycosidases	G	Human
XAEYMNHXXDXGVAGFR	COG0366 Glycosidases	G	Human
DFPAVPYSGWDFNDGK	COG0366 Glycosidases	G	Human
XXXVSFDGFR	COG1524 Uncharacterized proteins of the AP superfamily	R	Human
EAGXEDDPDXCFADFVR	COG1053 Succinate dehydrogenase/fumarate reductase, flavoprotein subunit	C	Unknown
YAAVGXXFPXHVVQXR	NO HITS		Unknown
AYVAFPDFFR	COG1501 Alpha-glucosidases, family 31 of glycosyl hydrolases	G	Human
THNXEPYFESFXNNXR	NO HITS		Human
FXGFEQXFK	COG0334 Glutamate dehydrogenase/leucine dehydrogenase	E	Unknown
SXDXDSXXAEVK	NO HITS		Human
NXDXDSXXAEVK	NO HITS		Human
YGXDGVXDNVVVWDK	COG4724 Endo-beta-N-acetylglucosaminidase D	G	Unknown
AXVTAXXAEXKXDDVK	COG2272 Carboxylesterase type B	I	Unknown
GAXXYAFEMFR	NO HITS		Human
YXCGAHSDGQXQEGSPXQAWQXFVNEESTXPR	NO HITS		Human
XTPNXAEFAFSXYR	COG4826 Serine protease inhibitor	O	Human
XTPNXAEFAFSXYR	COG4826 Serine protease inhibitor	O	Human
GXXDAXXSGAXDKAPTK	COG1866 Phosphoenolpyruvate carboxykinase (ATP)	C	Unknown
VPFXNFFDGFR	COG0674 Pyruvate:ferredoxin oxidoreductase and related 2-oxoacid:ferredoxin oxidoreductases, alpha subunit	C	Bacteria
NNVDENXVEXAPXAEVGAYXNR	NO HITS		Unknown
VPEGXEDVSKYPDXXAEXXR	COG2355 Zn-dependent dipeptidase, microsomal dipeptidase homolog	E	Human
VPEGXEDVSKYPDXXAEXXR	COG2355 Zn-dependent dipeptidase, microsomal dipeptidase homolog	E	Human
DVXGTDDPDAVQEAXADWDKFNAVAEQAAAK	NO HITS		Unknown
VSAFXDWXEETXASH	COG5640 Secreted trypsin-like serine protease	O	Human
EXDRDTVFAXVNYXFFK	COG4826 Serine protease inhibitor	O	Human
EXDRDTVFAXVNYXFFK	COG4826 Serine protease inhibitor	O	Human
DXXAFXDASPVNFXAVK	COG1362 Aspartyl aminopeptidase	E	Unknown
SMVVQHNMQAANANR	COG1344 Flagellin and related hook-associated proteins	N	Unknown
SMVVQHNMQAANANR	COG1344 Flagellin and related hook-associated proteins	N	Unknown
GPYESGSGHSSGXGHR	NO HITS		Human
SMVVQHNMQAANANR	COG1344 Flagellin and related hook-associated proteins	N	Unknown
XECDDKGDGSCDVR	COG5069 Ca2+-binding actin-bundling protein fimbrin/plastin (EF-Hand superfamily)	Z	Human
RGGDGGEFGATTGRPR	COG0104 Adenylosuccinate synthase	F	Bacteria
ATASADEQNEVAK	COG1344 Flagellin and related hook-associated proteins	N	Unknown
SANASGSVEAATK	COG2182 Maltose-binding periplasmic proteins/domains	G	Unknown
GGSGGSYGGGGSGGGYGGGSGSR	NO HITS		Human
SMVVQHNMQAANANR	COG1344 Flagellin and related hook-associated proteins	N	Unknown
XRDTDMAQEMVNYSK	COG1344 Flagellin and related hook-associated proteins	N	Unknown
RGGDGGEFGATTGRPR	COG0104 Adenylosuccinate synthase	F	Bacteria
GGSGGSYGGGGSGGGYGGGSGSR	NO HITS		Human
XAHVVXKEEQK	NO HITS		Human
SANASGSVEAATK	COG2182 Maltose-binding periplasmic proteins/domains	G	Unknown
FSSSSGYGGGSSR	NO HITS		Human
SAXGAVQNR	COG1344 Flagellin and related hook-associated proteins	N	Bacteria
SGGGGGGGXGSGGSXR	NO HITS		Human
XXDGSQGGSSSTTGSGPK	COG1344 Flagellin and related hook-associated proteins	N	Unknown
YVEASPNATDATK	NO HITS		Unknown
KXTHQYQGVXTGK	COG0334 Glutamate dehydrogenase/leucine dehydrogenase	E	Unknown
YTQEXATSADGK	NO HITS		Unknown
AFVNCDENSR	NO HITS		Human
YAVNDAQPEESR	COG1653 ABC-type sugar transport system, periplasmic component	G	Unknown
AWDADQTEANNR	NO COG		Human
NXVRPXSSAPAAK	COG1866 Phosphoenolpyruvate carboxykinase (ATP)	C	Bacteria
VGTYHTDCNCFR	NO HITS		Human
AADGAGSQGXDXQEKR	COG4724 Endo-beta-N-acetylglucosaminidase D	G	Unknown
MXGXTSGAQAK	COG1344 Flagellin and related hook-associated proteins	N	Unknown
XTHQYQGVXTGK	COG0334 Glutamate dehydrogenase/leucine dehydrogenase	E	Unknown
ENYXXEFXK	COG0454 Histone acetyltransferase HPA2 and related acetyltransferases	KR	Unknown
AVEEKYPEXTH	NO HITS		Unknown
VQTFQGDDDHNWK	NO HITS		Human
VQTFQGDDDHNWK	NO HITS		Human
XFGPDETASNR	COG3957 Phosphoketolase	G	Bacteria
NYAXGTVSQTK	NO HITS		Unknown
TNAENEFVTXKK	NO HITS		Human
NSKXEXSEXNR	NO HITS		Human
HFVAVSTNXEK	COG0166 Glucose-6-phosphate isomerase	G	Bacteria
NSKXEXSEXNR	NO HITS		Human
XKDTGXTAAEXK	COG4992 Ornithine/acetylornithine aminotransferase	E	Unknown
XKDTGXTAAEXK	COG4992 Ornithine/acetylornithine aminotransferase	E	Unknown
XNXEGNHANXAGHTYQHEXR	COG2115 Xylose isomerase	G	Bacteria
XKYENEVAXR	NO HITS		Human
XEGDDDNPXTTGR	COG0243 Anaerobic dehydrogenases, typically selenocysteine-containing	C	Unknown
AXVFVDNHDNQR	COG0366 Glycosidases	G	Human
XKYENEVAXR	NO HITS		Human
VNDTAEATXEYK	NO HITS		Unknown
TPXTATXSK	NO HITS		Human
GXSYGGSXAR	COG0334 Glutamate dehydrogenase/leucine dehydrogenase	E	Bacteria
AADDAAGXSXSEK	COG1344 Flagellin and related hook-associated proteins	N	Bacteria
AGDDAAGXAXSEK	COG1344 Flagellin and related hook-associated proteins	N	Bacteria
HXGADTDVPAGDXGTGAR	COG0334 Glutamate dehydrogenase/leucine dehydrogenase	E	Bacteria
TXNAGDTVSXGGK	COG1344 Flagellin and related hook-associated proteins	N	Unknown
NYTXGGEEADVK	COG1344 Flagellin and related hook-associated proteins	N	Unknown
FHPSVNQGXXK	COG0334 Glutamate dehydrogenase/leucine dehydrogenase	E	Bacteria
XTDHYPGYEEVDGTTGK	NO HITS		Unknown
XTEXTATVAGNTK	NO HITS		Unknown
VSAXVDYER	NO COG		Human
XXMDEXTQVKK	COG0188 Type IIA topoisomerase (DNA gyrase/topo II, topoisomerase IV), A subunit	L	Unknown
XEXSEXNR	NO HITS		Human
DNTVAGATVADAVK	NO HITS		Unknown
VQYNAAXGPYK	COG0334 Glutamate dehydrogenase/leucine dehydrogenase	E	Unknown
FXEQQNQVXQTK	NO HITS		Human
XTXNXGAQSEK	COG2182 Maltose-binding periplasmic proteins/domains	G	Unknown
YEEXQXTAGR	NO HITS		Human
HSYTASYDXYDXNKR	COG1506 Dipeptidyl aminopeptidases/acylaminoacyl-peptidases	E	Human
EXEEXYNNPQNPER	COG1501 Alpha-glucosidases, family 31 of glycosyl hydrolases	G	Human
VPWVDDNGQVQVNR	COG0334 Glutamate dehydrogenase/leucine dehydrogenase	E	Bacteria
VPWVDDQGKVQVNR	COG0334 Glutamate dehydrogenase/leucine dehydrogenase	E	Bacteria
XGTHXXSXDPR	COG0243 Anaerobic dehydrogenases, typically selenocysteine-containing	C	Unknown
SDXVNEEATGQFR	NO HITS		Human
FNAYYPEVK	NO HITS		Unknown
XRNEFTGVXTGK	COG0334 Glutamate dehydrogenase/leucine dehydrogenase	E	Unknown
NYFDGNATXDEAK	NO HITS		Unknown
XHPSVNXGXXK	COG0334 Glutamate dehydrogenase/leucine dehydrogenase	E	Bacteria
AWGPGXETGQVGK	COG5069 Ca2+-binding actin-bundling protein fimbrin/plastin (EF-Hand superfamily)	Z	Human
VQMNSAXGPYK	COG0334 Glutamate dehydrogenase/leucine dehydrogenase	E	Unknown
NSXTGXPXGGGK	COG0334 Glutamate dehydrogenase/leucine dehydrogenase	E	Unknown
NSXTTXPXGGGK	COG0334 Glutamate dehydrogenase/leucine dehydrogenase	E	Unknown
XHPSVNXGXXK	COG0334 Glutamate dehydrogenase/leucine dehydrogenase	E	Bacteria
FKDXDTXVATAK	NO HITS		Unknown
GAXADNXXR	COG2355 Zn-dependent dipeptidase, microsomal dipeptidase homolog	E	Human
GSVTFHCAXGPEVANVAK	NO HITS		Human
SXTTXDDTKADGXDDNDTSVXTK	COG1344 Flagellin and related hook-associated proteins	N	Unknown
GXNWGGSXAR	COG0334 Glutamate dehydrogenase/leucine dehydrogenase	E	Bacteria
YQFNSAXGPYK	COG0334 Glutamate dehydrogenase/leucine dehydrogenase	E	Unknown
YVDSPYTXDVK	NO HITS		Unknown
XDVDNNNFDXK	NO HITS		Unknown
YENXESADDAYQFK	NO HITS		Unknown
STDGHXDKYAAEAXXGR	NO HITS		Unknown
GYGFGAEGDWK	COG2160 L-arabinose isomerase	G	Bacteria
XSXTGTYDXK	COG4826 Serine protease inhibitor	O	Human
XQMNSAXGPYK	COG0334 Glutamate dehydrogenase/leucine dehydrogenase	E	Bacteria
EXGYXFGQYKR / EXGYXFGQYRK	COG0334 Glutamate dehydrogenase/leucine dehydrogenase	E	Unknown
PNFVDPXAEVHAR	COG0148 Enolase	G	Unknown
FHPSVNXSXXK	COG0334 Glutamate dehydrogenase/leucine dehydrogenase	E	Unknown
MGGXSTAEVEFR	COG0474 Cation transport ATPase	P	Unknown
FGVAAADXGXVGKK	COG4724 Endo-beta-N-acetylglucosaminidase D	G	Unknown
YYXEVANMPTTNDAXR	COG0334 Glutamate dehydrogenase/leucine dehydrogenase	E	Unknown
XPAAFXDXAHK	COG4724 Endo-beta-N-acetylglucosaminidase D	G	Unknown
FHPSVNXSXXK	COG0334 Glutamate dehydrogenase/leucine dehydrogenase	E	Unknown
RHPDYSVVXXXR	NO HITS		Human
GVXXNAFER	NO HITS		Human
VGDYFAAEXAK	COG4992 Ornithine/acetylornithine aminotransferase	E	Unknown
GXVMEXXYRTK	NO HITS		Unknown
SVXGQXGXTK	COG4826 Serine protease inhibitor	O	Human
AVGFGGDFDGVPR	COG2355 Zn-dependent dipeptidase, microsomal dipeptidase homolog	E	Human
TXTXXSVTR	NO HITS		Human
RXGAENYVFWGGR	COG2115 Xylose isomerase	G	Bacteria
XSDFEDVXGQR	NO HITS		Human
VSXWVTVR	NO COG		Human
GSXGGGFSSGGFSGGSFSR	NO HITS		Human
FASNVNXSXXK	COG0334 Glutamate dehydrogenase/leucine dehydrogenase	E	Unknown
VFSNGADXSGVTEEAPXK	COG4826 Serine protease inhibitor	O	Human
XAVKDPTQYAAFXK	NO HITS		Unknown
HGVQEXEXEXQSQXSKK	NO HITS		Human
XPEFNSXXGQR	NO HITS		Human
TSXWSDQWAADQGPAGK	NO HITS		Unknown
DPTQYAAFXK	NO HITS		Unknown
VXGGQNPXAMFCAGAEK	NO HITS		Unknown
FXAFEQTFK	COG0334 Glutamate dehydrogenase/leucine dehydrogenase	E	Unknown
VAYDXVYYVR	NO HITS		Human
FXGFEQTFK	COG0334 Glutamate dehydrogenase/leucine dehydrogenase	E	Unknown
XGAENYVFWGGR	COG2115 Xylose isomerase	G	Bacteria
GHGAGGASXXTFWDAR	COG0366 Glycosidases	G	Human
GHGAGGASXXTFWDAR	COG0366 Glycosidases	G	Human
HGVQEXEXEXQSQXSK	NO HITS		Human
SXNNQFASFXDKVR	NO HITS		Human
SSXWDATWAADQGPTGK	NO HITS		Unknown
TSXVHXFEWR	COG0366 Glycosidases	G	Human
FAGFPAXXNR	COG1501 Alpha-glucosidases, family 31 of glycosyl hydrolases	G	Human
TSXVHXFEWR	COG0366 Glycosidases	G	Human
AXXEHEXXHAXGFYHEQSR	NO HITS		Human
XDFSAXDXER	NO HITS		Human
YYFXSGFTAK	COG1866 Phosphoenolpyruvate carboxykinase (ATP)	C	Bacteria
XVSXTXNXVTR	NO HITS		Human
QVXXTXXDQEPDVR	NO HITS		Human
VTXPTDMDAVPETXDXXK	NO HITS		Unknown
DGSFSVVXTGXR	NO HITS		Human
NADXQVXKPEPEXVYEDXR	NO HITS		Human
FYNSEGYGFGVTXYPNSR	NO HITS		Human
NWGEGWGFVPSDR	COG0366 Glycosidases	G	Human
XAXDXEXATYR	NO HITS		Human
XAXQQXXAAAK	COG0028 Thiamine pyrophosphate-requiring enzymes [acetolactate synthase, pyruvate dehydrogenase (cytochrome), glyoxylate carboligase, phosphonopyruvate decarboxylase]	EH	Unknown
TXAXVAXNFK	COG4724 Endo-beta-N-acetylglucosaminidase D	G	Unknown
VPXAXFAXNR	COG0006 Xaa-Pro aminopeptidase	E	Human
AAADQPXVXAAVEGXK	NO HITS		Unknown
XTGXXDXAXEKDYVR	COG0366 Glycosidases	G	Human
XTGXXDXAXEKDYVR	COG0366 Glycosidases	G	Human
XSGXXDXAXGKDYVR	COG0366 Glycosidases	G	Human
FXEQQNQVXQTKWEXXQQVDTSTR	NO HITS		Human
XTGXXDXAXEK	COG0366 Glycosidases	G	Human
NVXVAXREPSXGPVFGXK	COG2759 Formyltetrahydrofolate synthetase	F	Unknown
FXGFEQVFK	COG0334 Glutamate dehydrogenase/leucine dehydrogenase	E	Unknown
FXGFEQXXK	COG0334 Glutamate dehydrogenase/leucine dehydrogenase	E	Unknown
VXAPAXVGFSAXEQR	COG0148 Enolase	G	Unknown
GXVXGAGWAEGYXR	NO COG		Human
XVGXXDXAXEKDYVR	COG0366 Glycosidases	G	Human
TXNQPDSQXQXTTGNGXFXSEGXK	COG4826 Serine protease inhibitor	O	Human
XAEYMNHXXDXGVAGFR	COG0366 Glycosidases	G	Human
FXGXEQXXK	COG0334 Glutamate dehydrogenase/leucine dehydrogenase	E	Bacteria
XXXVSFDGFR	COG1524 Uncharacterized proteins of the AP superfamily	R	Human
AYVAFPDFFR	COG1501 Alpha-glucosidases, family 31 of glycosyl hydrolases	G	Human
THNXEPYFESFXNNXR	NO HITS		Human
FXGFEQXFK	COG0334 Glutamate dehydrogenase/leucine dehydrogenase	E	Unknown
GXGTDQXSXATQEDANAAXDKXDNAXNK	COG1344 Flagellin and related hook-associated proteins	N	Unknown
SXDXDSXXAEVK	NO HITS		Human
NXDXDSXXAEVK	NO HITS		Human
GAXXYAFEMFR	NO HITS		Human
NNXXAKAGQSMXAQANQSNQGVXSXXQ	COG1344 Flagellin and related hook-associated proteins	N	Unknown
YXCGAHSDGQXQEGSPXQAWQXFVNEESTXPR	NO HITS		Human
XTPNXAEFAFSXYR	COG4826 Serine protease inhibitor	O	Human
XTPNXAEFAFSXYR	COG4826 Serine protease inhibitor	O	Human
NXXXFXGDGXGVPTVTATR	COG1785 Alkaline phosphatase	P	Human
VPFXNFFDGFR	COG0674 Pyruvate:ferredoxin oxidoreductase and related 2-oxoacid:ferredoxin oxidoreductases, alpha subunit	C	Bacteria
VPEGXEDVSKYPDXXAEXXR	COG2355 Zn-dependent dipeptidase, microsomal dipeptidase homolog	E	Human
DVXGTDDPDAVQEAXADWDKFNAVAEQAAAK	NO HITS		Unknown
SXDXDSXXAEVKAQYEDXAQK	NO HITS		Human
VSAFXDWXEETXASH	COG5640 Secreted trypsin-like serine protease	O	Human
EXDRDTVFAXVNYXFFK	COG4826 Serine protease inhibitor	O	Human
EXDRDTVFAXVNYXFFK	COG4826 Serine protease inhibitor	O	Human
[truncated: 966 more rows]

## Sheet: B1
Peptide	COG	Functional category	Group	Phylum	Class	Order	Family	Genus	Species
[truncated: 6,421 more rows]

[truncated: 3 more sheets: B2, C1, C2]
